# Supplementary material for: Rapid assay development for low input targeted proteomics using a versatile linear ion trap
Source: Research Square preprint supplement (doi:10.21203/rs.3.rs-4702746/v1), 2024-07-19
Supplement: Supplementary file 1 [file 60e9732382a087eb57a87c71.xlsx]

## Sheet: TableDescriptions
Rapid assay development for low input targeted proteomics using a versatile linear ion trap
Ariana E. Shannon,1,2 Rachael N. Teodorescu,1 Nojoon Soon,1 Lilian R. Heil,3 Cristina C. Jacob,3 Philip M. Remes,3 Zihai Li,1 Mark P. Rubinstein,1,4 Brian C. Searle1,2,*
1Pelotonia Institute for Immuno-Oncology, The Ohio State University Comprehensive Cancer Center, Columbus, OH, 43210, USA.
2Department of Biomedical Informatics, The Ohio State University Medical Center, Columbus, OH, 43210, USA.
3Thermo Fisher Scientific, San Jose, CA, 95134, United States
4Division of Medical Oncology, Department of Internal Medicine, The Ohio State University College of Medicine, Columbus, OH, 43210, USA.
Tab Name	Description
S1_1ngFOM	The output from EncyclopeDIA for calculating Figures of Merit from the integration results exported from Skyline documents available at https://panoramaweb.org/StellarIonTrapForLowInput.url. The first column in each table are modififed peptide sequences as the peptide column and protein name and accession as the protein column. To calcaulte the limits of detection and quantification, EncyclopeDIA…
S2_10ngFOM
S3_100ngFOM
S4_PantherAnnotation	The functional annotation of all proteins from PANTHER DB. Proteins annotated with immune response in pathways or biological processes, as well as cytokines, chaperones and transcription factors were scheduled for PRM.
S5_SampleList	The sample list used in the supplementary note to schedule an assay using the PRM Scheduler within EncyclopeDIA.
S6_TargetProteins	The list of target proteins used in the PRM Scheduler tutorial within the Supplemental Note.
S7_InclusionAndEclusionLists	The inclusion and excluded peptides from the PRM Scheduler tutorial within the Supplemental Note.

## Sheet: S1_1ngFOM
peptide	protein	lod	loq	r2	m	b	noiseStdev	linearStdev	max
IGGVQQDTILAEGLHFR	sp|O35129|PHB2_MOUSE	-0.845074	-0.00420435	0.101408	1	-0.198195	0.0511932	0.28029	6032
VLPSIVNEVLK	sp|O35129|PHB2_MOUSE	-1.5146	-0.109277	0.323274	1	-0.392874	0.0922023	0.468442	53417
IVQAEGEAEAAK	sp|O35129|PHB2_MOUSE	-1.78816	-1.5545	0.0186037	1	-0.0641738	0.0346991	0.0778878	58080
VQVVDEEGDQQHQEGK	sp|O70494|SP3_MOUSE	-1.05102	-0.760711	0.0685105	1	-0.0235979	0.0967711	0.030529	4833
GPAISIC[+57]K	sp|P01590|IL2RA_MOUSE	-0.960789	-0.663255	0.0278953	1	0.0681294	0.0440083	0.0991777	40644
TGWTQPQLTC[+57]VDER	sp|P01590|IL2RA_MOUSE	-1.51836	-0.878659	0.156556	1	-0.1739	0.136799	0.213232	3594
FLASEESQGSR	sp|P01590|IL2RA_MOUSE	-1.4978	-0.999403	0.201271	1	-0.0611111	0.166134	0.0751676	9670
YVLTLNK	sp|P01731|CD8A_MOUSE	-1.27347	-0.95248	0.102036	1	0.0600157	0.094704	0.106998	25388
WEQAGEAER	sp|P01901|HA1B_MOUSE	-1.30774	-0.875448	0.212403	1	-0.0272873	0.144098	0.0925075	8154
NIIGMDKPLSLPGFLAK	sp|P03958|ADA_MOUSE	-0.0509922	0	0.511692	1	0	0.12768	0	677
TQQVIPMVK	sp|P04187|GRAB_MOUSE	-2.12864	-1.60478	0.157493	1	-0.0842227	0.174618	0.119159	803366
YSNTLQEVELTVQK	sp|P04187|GRAB_MOUSE	-1.08435	-0.171065	0.109805	1	-0.248249	0.0375454	0.304428	97108
EC[+57]ESYFK	sp|P04187|GRAB_MOUSE	-1.73957	-1.35855	0.0880648	1	-0.0789633	0.127007	0.0927536	156911
VAAGIVSYGYK	sp|P04187|GRAB_MOUSE	-2.0727	-1.62159	0.113007	1	-0.077227	0.15037	0.102355	843427
DETVDDFWR	sp|P06800|PTPRC_MOUSE	-1.50046	-0.938201	0.0450843	1	-0.158309	0.0250738	0.187421	69509
TQHIGNQEENK	sp|P06800|PTPRC_MOUSE	-1.3946	-1.06189	0.106702	1	-0.00279969	0.110903	0.0839531	14432
NSNVVPYDFNR	sp|P06800|PTPRC_MOUSE	-2.09389	-1.61432	0.069037	1	-0.137065	0.0938059	0.159858	65016
GEELPAEPK	sp|P06800|PTPRC_MOUSE	-1.89334	-1.63126	0.0187174	1	0.00418992	0.0356411	0.0873608	146888
SLGTDLMNEMR	sp|P09055|ITB1_MOUSE	-1.29902	-0.967029	0.0455065	1	-0.0144574	0.0287219	0.110665	12349
GVLYGESVDK	sp|P10300|CD8B_MOUSE	-1.21889	-0.808014	0.160153	1	0.0425256	0.136958	0.105034	28683
NIILESSDSR	sp|P10300|CD8B_MOUSE	-1.7502	-1.55938	0.0201623	1	-0.0313581	0.0636083	0.0370211	61924
MVFGTGTK	sp|P10300|CD8B_MOUSE	-1.32687	-1.058	0.0522367	1	0.00715861	0.0896223	0.0403146	18478
YAGVFHVEK	sp|P15379|CD44_MOUSE	-0.651924	-0.16212	0.336339	1	0.0426043	0.163268	0.0602516	4283
YGFIEGNVVIPR	sp|P15379|CD44_MOUSE	-1.22651	0	0.295781	1	-0.36044	0.0917911	0.44516	9349
LVINGGNGTVEDR	sp|P15379|CD44_MOUSE	-1.26598	-0.914647	0.13569	1	0.00434044	0.115536	0.117112	3434
SQEMVHLVNKEPSETPDQC[+57]MTADETR	sp|P15379|CD44_MOUSE	-1.12191	-0.745229	0.110078	1	0.0546405	0.101562	0.12556	1798
TC[+57]DFHPFDNLR	sp|P16297|IL2RB_MOUSE	-0.934511	-0.399839	0.0719458	1	0.111363	0.0609904	0.178224	53220
YLPALQGC[+57]R	sp|P24788|CD11B_MOUSE	-1.2055	-0.471796	0.159423	1	0.168214	0.101728	0.244568	16214
SVEEFQC[+57]LNR	sp|P24788|CD11B_MOUSE	-1.20809	-0.75163	0.097409	1	-0.107659	0.0663887	0.152153	5462
IEEGTYGVVYR	sp|P24788|CD11B_MOUSE	-1.43603	-0.852165	0.120878	1	-0.155752	0.104481	0.194623	8438
EIVVGSNMDK	sp|P24788|CD11B_MOUSE	-1.2861	-0.994034	0.0484722	1	0.0499986	0.0610322	0.0973564	12676
FLTYYPGR	sp|P24788|CD11B_MOUSE	-0.786644	-0.636069	0.0357847	1	-0.0104537	0.0501915	0.0147838	12322
SWALAQR	sp|P37217|CD69_MOUSE	-0.125241	0	1.95568	1	0	0.333662	0	7664
YSGELEHWIGLK	sp|P37217|CD69_MOUSE	-0.791727	-0.642835	0.0279338	1	0.0111496	0.0496305	0.0157679	10233
LAGMADGLFLLR	sp|P43404|ZAP70_MOUSE	0	0	0.742249	1	-0.0461681	0.157335	0.0461681	823
KHPDASVNFSEFSK	sp|P63158|HMGB1_MOUSE	-0.703623	-0.472015	0.0623821	1	0.014122	0.0772026	0.0199715	4809
FKDPNAPK	sp|P63158|HMGB1_MOUSE	-1.38421	-0.595363	0.100283	1	0.212406	0.0301998	0.262948	21150
VLPSITTEILK	sp|P67778|PHB_MOUSE	-1.7197	-1.03223	0.0787635	1	-0.190873	0.0422574	0.229155	41346
AAIISAEGDSK	sp|P67778|PHB_MOUSE	-1.88983	-1.61774	0.0350215	1	-0.0295053	0.0642769	0.0906964	110207
AAELIANSLATAGDGLIELR	sp|P67778|PHB_MOUSE	0	0	0.5119	1	-0.0928729	0.128089	0.0928729	2436
SAGPPEPEVSMR	sp|Q02111|KPCT_MOUSE	-1.13279	-0.493797	0.0888877	1	0.108221	0.0546716	0.212999	5799
MLDASGEK	sp|Q03267|IKZF1_MOUSE	-0.798974	-0.632244	0.0676738	1	-0.0253043	0.0555766	0.0357856	12951
VVSTSGEQLK	sp|Q03267|IKZF1_MOUSE	-1.54753	-1.3538	0.0352046	1	-0.0114884	0.0645781	0.0324944	43435
LQSTENDYINASLVDIEEAQR	sp|Q06180|PTN2_MOUSE	-1.10167	0	0.207851	1	-0.291435	0.0580603	0.379573	5266
FSYMAIIEGAK	sp|Q06180|PTN2_MOUSE	-0.5637	0	0.201652	1	-0.133107	0.101272	0.188242	1602
TLWENLSMIR	sp|Q60611|SATB1_MOUSE	-0.914617	0	0.241431	1	-0.297711	0.0846408	0.421027	3098
MLFLVAQDTK	sp|Q60766|IRGM1_MOUSE	-0.537986	-0.412403	0.0398955	1	0.0220011	0.0418613	0.0311143	7792
NVEAQSTEEMFVK	sp|Q61735|CD47_MOUSE	-1.3572	0	0.441722	1	-0.432366	0.122336	0.531751	5359
SMVDVLADHAGELVR	sp|Q64131|RUNX3_MOUSE	-0.615911	0	0.420013	1	-0.285563	0.110316	0.403847	5364
DKYENEDLIK	sp|Q78PG9|CCD25_MOUSE	-0.840589	-0.286567	0.451223	1	-0.0497545	0.184674	0.0703635	2921
MNNVNVVYTPWSNLK	sp|Q78PG9|CCD25_MOUSE	-0.804899	0	0.0909632	1	0.180114	0.0645789	0.282114	510
TADMDVGQIGFHR	sp|Q78PG9|CCD25_MOUSE	-1.31946	-0.957956	0.0781969	1	-0.0938747	0.0851896	0.120502	3445
VFFYNPTTR	sp|Q8CGF7|TCRG1_MOUSE	-1.57003	-1.42338	0.0133392	1	1.79634e-05	0.0206658	0.0488844	20175
LSMWDRPDDLIGR	sp|Q8CGF7|TCRG1_MOUSE	-0.528022	-0.0769062	0.0779647	1	-0.106329	0.0624743	0.150372	6252
EALFNEFVAAAR	sp|Q8CGF7|TCRG1_MOUSE	-0.653491	0	0.242796	1	-0.220918	0.0889042	0.312425	3325
ALLSDMVR	sp|Q8CGF7|TCRG1_MOUSE	-1.20785	-0.0219942	0.525795	1	0.135164	0.0545135	0.395286	7105
YLVLDC[+57]VPEER	sp|Q8CGF7|TCRG1_MOUSE	-1.71451	-0.838304	0.23212	1	-0.163615	0.121884	0.292067	11254
VTEDLFSSLK	sp|Q8K1X4|NCKPL_MOUSE	-1.44545	-1.16152	0.0812297	1	-0.0491561	0.0946441	0.0620943	12899
SKPSSPVVSEK	sp|Q8K352|SASH3_MOUSE	-1.12551	-0.801557	0.12126	1	-0.0520843	0.107985	0.067994	15022
GTEMDC[+57]PR	sp|Q9QZL0|RIPK3_MOUSE	-0.862905	-0.275798	0.0379314	1	0.128406	0.0421731	0.195702	8937

## Sheet: S2_10ngFOM
peptide	protein	lod	loq	r2	m	b	noiseStdev	linearStdev	max
VLPSIVNEVLK	sp|O35129|PHB2_MOUSE	-1.78049	-1.22684	0.204112	1	0.100291	0.184549	0.167147	239998
FEEGGYVVC[+57]NTK	sp|O08573|LEG9_MOUSE	-1.76268	-0.8605	0.157615	1	0.169663	0.0710774	0.300728	29813
SIMISGNVLPDATR	sp|O08573|LEG9_MOUSE	-1.40326	-0.980486	0.206102	1	0.0357257	0.140924	0.0717529	25314
NTQINNSWGQEER	sp|O08573|LEG9_MOUSE	-1.93222	-1.4457	0.0706824	1	0.0835594	0.0227419	0.162172	10657
AGGSASAMLQPLLDNQVGFK	sp|O09061|PSB1_MOUSE	-1.9285	-1.3659	0.304459	1	0.0426247	0.187534	0.163907	66819
LPFTALGSGQGAAVALLEDR	sp|O35955|PSB10_MOUSE	-1.56546	-1.0691	0.258075	1	-0.0566744	0.159277	0.165456	86718
YSMDSLSSER	sp|O54839|EOMES_MOUSE	-0.99498	-0.518002	0.219413	1	0.0459968	0.158993	0.0563368	27822
GANNNNTQMIVLQSLHK	sp|O54839|EOMES_MOUSE	-0.687722	-0.324002	0.2179	1	0.0857298	0.10175	0.12124	19325
LHIVEVTEDGVEDLNEPSK	sp|O54839|EOMES_MOUSE	-1.7863	-0.820833	0.160362	1	0.220207	0.0693867	0.321822	92788
YGVQNFFPEPFVNTLPQAR	sp|O54839|EOMES_MOUSE	-0.707005	-0.538638	0.0422003	1	0.0255794	0.0561223	0.0361747	6598
WLVTPVQQPVTNK	sp|O54839|EOMES_MOUSE	-1.79685	-0.93357	0.118219	1	0.211927	0.0319312	0.287761	28378
VDILDPALLR	sp|O88685|PRS6A_MOUSE	-2.4313	-1.91934	0.12043	1	0.125883	0.100962	0.170653	486288
HVFGQPAK	sp|O89053|COR1A_MOUSE	-2.57811	-2.22003	0.101202	1	0.0814955	0.117865	0.119361	2782873
RGLEVNK	sp|O89053|COR1A_MOUSE	-2.3605	-1.88718	0.131825	1	0.109726	0.116949	0.157774	1974737
DAGPLLISLK	sp|O89053|COR1A_MOUSE	-2.66162	-1.87009	0.298777	1	0.0745581	0.263843	0.0945861	2492785
QWLNQGDGIQGFR	sp|P04202|TGFB1_MOUSE	-1.3037	-0.693532	0.0999442	1	0.126945	0.0398264	0.203388	42845
VEQLSNMIVR	sp|P04202|TGFB1_MOUSE	-0.889187	-0.452508	0.0641411	1	0.0912907	0.0690588	0.145559	36921
ELSDIAHR	sp|P05064|ALDOA_MOUSE	-2.54456	-2.13438	0.118432	1	0.097399	0.136728	0.129469	935491
LQSIGTENTEENRR	sp|P05064|ALDOA_MOUSE	-2.57342	-0.911055	1.27265	1	0.077766	0.554122	0.115995	6684268
FSNEEIAMATVTALR	sp|P05064|ALDOA_MOUSE	-1.77704	-1.1793	0.182759	1	0.0273776	0.131118	0.199246	236563
ALANSLAC[+57]QGK	sp|P05064|ALDOA_MOUSE	-2.68548	-1.50973	0.635807	1	0.0822833	0.391917	0.101681	2930466
EVMQMLVELAK	sp|P06745|G6PI_MOUSE	-1.64935	-1.33943	0.0883924	1	-0.0150825	0.0839432	0.103306	90600
APFDLFENR	sp|P07901|HS90A_MOUSE	-1.81074	-1.23146	0.108411	1	0.124887	0.10361	0.193096	341724
ALNTTYQSQLIKPSR	sp|P08046|EGR1_MOUSE	-0.66437	-0.38084	0.128337	1	0.0520252	0.0945099	0.0735747	36875
DGVANVSIEDR	sp|P08228|SODC_MOUSE	-2.46698	-1.87341	0.12472	1	0.139314	0.0396427	0.197857	888242
VISLSGEHSIIGR	sp|P08228|SODC_MOUSE	-2.46576	-2.02878	0.152154	1	0.0959301	0.145662	0.142887	1181972
YYVTIIDAPGHR	sp|P10126|EF1A1_MOUSE	-2.29649	-1.73527	0.127373	1	0.123554	0.0757734	0.187073	1198609
VGEFSGANK	sp|P10639|THIO_MOUSE	-2.60785	-2.19158	0.0519652	1	0.109623	0.0462228	0.138758	2217502
ADHGEPIGR	sp|P11499|HS90B_MOUSE	-2.43185	-1.98318	0.139754	1	0.0356856	0.149559	0.098254	902808
APFDLFENK	sp|P11499|HS90B_MOUSE	-2.07139	-1.20479	0.219268	1	0.20327	0.148637	0.288866	475787
LVINGKPITIFQER	sp|P16858|G3P_MOUSE	-2.61476	-1.88155	0.283814	1	0.0256878	0.244405	0.0902205	5657840
QASEGPLK	sp|P16858|G3P_MOUSE	-2.25249	-1.55964	0.100822	1	0.176543	0.0045085	0.230951	2573725
VVDLMAYMASKE	sp|P16858|G3P_MOUSE	-2.45612	-1.73549	0.275648	1	-0.0060859	0.240211	0.0866654	765837
EPSEVPTPK	sp|P17095|HMGA1_MOUSE	-0.809461	0	0.119879	1	0.238758	0.0593879	0.312971	195960
LMDLDVEQLGIPEQEYSC[+57]VIK	sp|P17918|PCNA_MOUSE	-1.46865	-0.365192	0.741756	1	-0.259173	0.22173	0.367821	33397
AVLFC[+57]LSEDKK	sp|P18760|COF1_MOUSE	-2.56665	-1.79317	0.297334	1	0.0555522	0.257826	0.0912455	1417682
IINEPTAAAIAYGLDKR	sp|P20029|BIP_MOUSE	-2.48743	-1.67661	0.397756	1	0.118432	0.270273	0.177822	631714
DNHLLGTFDLTGIPPAPR	sp|P20029|BIP_MOUSE	-1.70389	-1.3716	0.11075	1	-0.0214906	0.0754275	0.110763	166791
IEWLESHQDADIEDFK	sp|P20029|BIP_MOUSE	-1.4943	-1.15258	0.13484	1	0.0214867	0.0813627	0.113907	232610
EVVEEAENGR	sp|P26350|PTMA_MOUSE	-2.64764	-1.60736	0.50276	1	0.10117	0.346761	0.117756	3791826
VAEDDEDDDVDTKK	sp|P26350|PTMA_MOUSE	-2.59229	-1.90317	0.265097	1	0.0937796	0.229708	0.133417	1870720
ALEQFLQEYFDGNLK	sp|P27773|PDIA3_MOUSE	-0.721013	-0.299702	0.28873	1	-0.017702	0.140437	0.0250344	6312
TSTMNAEEELVLHSAK	sp|P29352|PTN22_MOUSE	-1.59422	-1.04385	0.0958487	1	0.114668	0.0363346	0.183459	45434
ASPVVGEPLQK	sp|P29352|PTN22_MOUSE	-1.16497	0	0.22941	1	0.345456	0.0494403	0.446805	62089
STPFELIQQR	sp|P29352|PTN22_MOUSE	-1.17467	-0.461262	0.0966815	1	0.180925	0.0749853	0.237804	43726
NSSSFLNFGFGNR	sp|P29352|PTN22_MOUSE	-0.536448	0	0.967594	1	0.0992445	0.185464	0.140353	10481
VLMSSANEDIK	sp|P34902|IL2RG_MOUSE	-1.6306	-1.15434	0.0918612	1	0.122283	0.06772	0.158753	118653
EITSGC[+57]QIQK	sp|P34902|IL2RG_MOUSE	-1.71425	-0.90931	0.077652	1	0.157302	0.026325	0.268313	31619
LNLQNLVIPR	sp|P34902|IL2RG_MOUSE	-1.45587	-1.04322	0.0967379	1	0.0969163	0.0841505	0.137548	59670
FSLPSVDELKR	sp|P34902|IL2RG_MOUSE	-1.62472	-1.01383	0.31521	1	0.0620896	0.20363	0.127997	40291
GLTESLQPDYSER	sp|P34902|IL2RG_MOUSE	-1.72832	-0.759768	0.121494	1	0.220133	0.0336205	0.322851	40764
SALFAQINQGESITHALK	sp|P40124|CAP1_MOUSE	-2.03731	-1.69668	0.129616	1	-0.0104167	0.0879875	0.113543	331276
SSEMNVLIPTEGGDFNEFPVPEQFK	sp|P40124|CAP1_MOUSE	-1.30242	-0.464696	0.383082	1	-0.13068	0.14276	0.279242	23286
ELEPQIASAKPNAE	sp|P42082|CD86_MOUSE	-0.927	-0.355929	0.0588678	1	0.137351	0.0411173	0.190357	6660
FDAMPFTLR	sp|P50580|PA2G4_MOUSE	-1.77455	-1.20286	0.115629	1	0.117187	0.102973	0.190562	280406
ALLQSSASR	sp|P50580|PA2G4_MOUSE	-2.21184	-1.63153	0.065999	1	0.144976	0.0279882	0.193436	1314698
NKNPAPPLDAVEQILPTLVR	sp|P52293|IMA1_MOUSE	-1.22673	-1.05426	0.036597	1	-0.0365698	0.0574898	0.048891	39715
LDIDSAPITAR	sp|P52480|KPYM_MOUSE	-2.53149	-1.45606	0.541047	1	0.0944645	0.358478	0.115875	7666646
EATESFASDPILYRPVAVALDTK	sp|P52480|KPYM_MOUSE	-2.59181	-1.7088	0.415395	1	-0.122796	0.294334	0.162961	496557
APIIAVTR	sp|P52480|KPYM_MOUSE	-2.61401	-2.20251	0.047797	1	0.108806	0.0385486	0.137165	6839214
GIFPVLC[+57]K	sp|P52480|KPYM_MOUSE	-2.41665	-1.8675	0.183637	1	0.104303	0.183049	0.138374	4197339
GEGQLSAAER	sp|P58252|EF2_MOUSE	-2.45809	-1.65572	0.312633	1	0.0958033	0.267456	0.116599	3269716
TFC[+57]QLILDPIFK	sp|P58252|EF2_MOUSE	-2.15277	-1.6621	0.148087	1	-0.0251732	0.104749	0.163559	548335
FSVSPVVR	sp|P58252|EF2_MOUSE	-2.51834	-1.62982	0.392964	1	0.110426	0.296171	0.138599	3334940
DSVVAGFQWATK	sp|P58252|EF2_MOUSE	-1.47341	-1.04448	0.221137	1	-0.0219304	0.142978	0.137489	145383
EGALC[+57]EENMR	sp|P58252|EF2_MOUSE	-2.71007	-1.84797	0.35377	1	0.0614739	0.287367	0.0876785	1652292
NVFDEAILAALEPPEPK	sp|P60766|CDC42_MOUSE	-1.99928	-1.53485	0.123833	1	-0.0655696	0.074492	0.15481	186350
DQIYDIFQK	sp|P60843|IF4A1_MOUSE	-1.5404	-1.19729	0.107303	1	0.0686784	0.114373	0.08791	418015
GC[+57]EVVVSGK	sp|P62908|RS3_MOUSE	-2.48539	-2.16047	0.0380562	1	0.0738682	0.0101541	0.108307	1067109
TVTNAVVTVPAYFNDSQR	sp|P63017|HSP7C_MOUSE	-2.61012	-1.90732	0.276315	1	0.0951697	0.234267	0.136097	1229348
GTLDPVEK	sp|P63017|HSP7C_MOUSE	-2.52875	-1.5285	0.482263	1	0.110662	0.333419	0.136054	4866416
SINPDEAVAYGAAVQAAILSGDK	sp|P63017|HSP7C_MOUSE	-1.434	-0.898977	0.26824	1	-0.0456722	0.153384	0.17834	116753
NQTAEKEEFEHQQK	sp|P63017|HSP7C_MOUSE	-2.36507	-1.74756	0.252311	1	0.108698	0.205835	0.160068	704501
DLISHDELFSDIYK	sp|P63028|TCTP_MOUSE	-2.32538	-1.6354	0.396566	1	0.093056	0.183379	0.229993	1235097
GKLEEQKPER	sp|P63028|TCTP_MOUSE	-2.35813	-1.85866	0.0993975	1	0.11236	0.0469955	0.166489	946565
TAFDEAIAELDTLSEESYK	sp|P63101|1433Z_MOUSE	-0.856494	-0.547737	0.207271	1	-0.0514749	0.102919	0.0727965	11011
IEINFPAEYPFKPPK	sp|P68037|UB2L3_MOUSE	-1.79323	-1.2144	0.209189	1	-0.0274957	0.138281	0.192942	474246
SLHDALC[+57]VLAQTVK	sp|P80314|TCPB_MOUSE	-1.86982	-1.44697	0.0695083	1	-0.0239207	0.0504073	0.140951	272706
TENLLGSYFPK	sp|P97371|PSME1_MOUSE	-1.85515	-1.31995	0.205045	1	0.117719	0.178401	0.178283	297899
SELDLLDIR	sp|P97384|ANX11_MOUSE	-1.48286	-0.992103	0.224256	1	0.106755	0.163584	0.138919	143856
MDELQLFR	sp|Q01853|TERA_MOUSE	-2.32516	-1.68464	0.311567	1	0.101343	0.213506	0.179768	372346
LAGTQPLEVLEAVQR	sp|Q02053|UBA1_MOUSE	-2.19327	-1.48969	0.152214	1	0.151533	0.0981473	0.234527	152582
AAVASLLQSVQVPEFTPK	sp|Q02053|UBA1_MOUSE	-1.7089	-1.46902	0.0852024	1	0.00294886	0.07996	0.079322	67222
SSGSETEQVVDFSDR	sp|Q5SVQ0|KAT7_MOUSE	-1.23669	-0.805931	0.309212	1	0.0796218	0.14043	0.143586	3417
LQGQITEGSNMIK	sp|Q5SVQ0|KAT7_MOUSE	-1.48121	-0.936727	0.230275	1	-0.0157321	0.181495	0.0345056	17616
MLIDFSYLLSK	sp|Q5SVQ0|KAT7_MOUSE	-1.29969	-0.86845	0.106241	1	0.0742249	0.0937566	0.143747	49410
EIRPALELLEPIEQK	sp|Q61598|GDIB_MOUSE	-1.80252	-1.23169	0.122958	1	0.102678	0.114408	0.190278	268240
DELHIVEAEAMNYEGSPIK	sp|Q61937|NPM_MOUSE	-1.84566	-1.15368	0.245046	1	-0.0265468	0.106739	0.230661	212201
MSVQPTVSLGGFEITPPVVLR	sp|Q61937|NPM_MOUSE	-1.706	-0.922647	0.189758	1	-0.025534	0.0468588	0.261118	39881
GPSSVEDIK	sp|Q61937|NPM_MOUSE	-2.48082	-2.03432	0.115293	1	0.110008	0.117258	0.148832	1514134
MQASIEK	sp|Q61937|NPM_MOUSE	-1.63902	-1.193	0.193437	1	0.0940027	0.148672	0.113138	887675
EAVGDLLDAFK	sp|Q6NZJ6|IF4G1_MOUSE	-2.00268	-1.60103	0.114237	1	0.0564879	0.133884	0.097985	94354
VTSPYWEER	sp|Q80TQ2|CYLD_MOUSE	-0.62995	-0.359314	0.0778549	1	0.0637895	0.0705429	0.090212	23731
FASLQPVSNQIER	sp|Q80TQ2|CYLD_MOUSE	-1.37032	-0.917857	0.226751	1	0.100088	0.150821	0.129909	26698
VSHLLGINVTDFTR	sp|Q8VDD5|MYH9_MOUSE	-1.43086	-1.11827	0.145597	1	-0.00791376	0.0916288	0.104195	350172
ELETQISELQEDLESER	sp|Q8VDD5|MYH9_MOUSE	-2.22112	-1.57979	0.293549	1	0.101811	0.177675	0.213779	99634
LQQELDDLLVDLDHQR	sp|Q8VDD5|MYH9_MOUSE	-1.71651	-0.549267	0.688456	1	-0.263522	0.180308	0.389083	178885
EKPYFPIPEDC[+57]TFIQNVPLEDR	sp|Q8VEK3|HNRPU_MOUSE	-2.02588	-1.02651	0.357881	1	-0.131212	0.0512699	0.333123	203453
MC[+57]LFAGFQR	sp|Q8VEK3|HNRPU_MOUSE	-1.86157	-1.526	0.0813911	1	0.0168967	0.0889984	0.111857	459035
GAEEMETVIPVDVMR	sp|Q99LX0|PARK7_MOUSE	-1.20404	-0.619738	0.101691	1	0.135117	0.0683004	0.194766	148232
TQGPYDVVVLPGGNLGAQNLSESPMVK	sp|Q99LX0|PARK7_MOUSE	-2.56031	-1.65446	0.519412	1	0.0695179	0.301948	0.174984	220120
FTAEDVMAVR	sp|Q99MI6|GIMA3_MOUSE	-1.34993	-0.726645	0.106373	1	0.160623	0.0806682	0.20776	61343
DAILDALENLSGDELKK	sp|Q9EPB4|ASC_MOUSE	-1.32743	-0.716902	0.26362	1	0.0106807	0.12008	0.203509	26896
VTQWAEER	sp|Q9EQW7|KI13A_MOUSE	-2.36976	-1.88106	0.135745	1	0.124666	0.132072	0.162902	1918150
TFSFAIPLIEK	sp|Q9JIK5|DDX21_MOUSE	-1.09321	-0.380275	0.120034	1	0.166505	0.106439	0.237644	67711
LIGNMALLPLR	sp|Q9JM76|ARPC3_MOUSE	-1.83254	-1.30476	0.101376	1	0.0752871	0.0891745	0.175925	985680
FILNLPTFSVR	sp|Q9R1P3|PSB2_MOUSE	-1.47505	-0.909478	0.314509	1	-0.109381	0.182923	0.188524	100631
VPTWGPLR	sp|Q9Z1X4|ILF3_MOUSE	-1.41862	-0.915052	0.112985	1	0.130124	0.0977848	0.167857	130228
EDITQSAQHALR	sp|Q9Z1X4|ILF3_MOUSE	-1.22485	-0.494278	0.177387	1	0.146561	0.0793468	0.243524	61805
VLQDMGLPTGAEGR	sp|Q9Z1X4|ILF3_MOUSE	-1.43472	-1.0186	0.192781	1	0.089022	0.119636	0.138706	75211
AYAALAALEK	sp|Q9Z1X4|ILF3_MOUSE	-0.391592	0	0.0509126	1	0.134454	0.0362266	0.190147	69808
RPPEVASAIQPTPVSR	sp|O54824|IL16_MOUSE	-1.5965	-1.06049	0.169301	1	0.127202	0.126934	0.178671	268658
FSGLLGQGATVTAK	sp|O54824|IL16_MOUSE	-1.85734	-1.32864	0.141749	1	0.114622	0.112293	0.176232	84995
ALSPDPLLR	sp|O54824|IL16_MOUSE	-1.7895	-1.24212	0.153338	1	0.128557	0.126905	0.182459	285016
GNEVLSINGK	sp|O54824|IL16_MOUSE	-0.985234	-0.708724	0.140755	1	0.0363955	0.0921699	0.057246	74034
EATVC[+57]TVTLEK	sp|O54824|IL16_MOUSE	-1.59996	-0.706369	0.209201	1	0.18736	0.157941	0.297864	81299
TGWTQPQLTC[+57]VDER	sp|P01590|IL2RA_MOUSE	-1.64338	-1.43155	0.0676082	1	-0.0007581	0.0706077	0.0540815	27984
FLASEESQGSR	sp|P01590|IL2RA_MOUSE	-1.71276	-1.3789	0.10433	1	0.0888566	0.0958222	0.111286	63053
YVLTLNK	sp|P01731|CD8A_MOUSE	-0.704902	-0.474414	0.0840962	1	0.00575237	0.0768295	0.00813508	101462
VAAGIVSYGYK	sp|P04187|GRAB_MOUSE	-2.61527	-2.01632	0.179888	1	0.080582	0.199651	0.0995041	5087808
EGESAELPC[+57]ESSQK	sp|P06332|CD4_MOUSE	-1.45307	-0.929391	0.309342	1	0.0114598	0.174558	0.0152746	10726
MEDSQTYIC[+57]ELENR	sp|P06332|CD4_MOUSE	-1.57184	-1.25236	0.0595193	1	0.0914516	0.0786327	0.106493	55889
VVQVVAPETGLWQC[+57]LLSEGDKVK	sp|P06332|CD4_MOUSE	-1.01753	-0.0820991	0.230794	1	0.19934	0.134932	0.311811	4428
GVLYGESVDK	sp|P10300|CD8B_MOUSE	-1.71901	-0.803208	0.127255	1	0.203043	0.0845667	0.305267	147631
NIILESSDSR	sp|P10300|CD8B_MOUSE	-1.67553	-1.19476	0.0676295	1	0.122615	0.0639927	0.160258	234149
MVFGTGTK	sp|P10300|CD8B_MOUSE	-1.74515	-0.946483	0.10943	1	0.173391	0.0813185	0.266221	144516
DFAEMSSQLHLTPFTAR	sp|P10417|BCL2_MOUSE	-0.952964	-0.641574	0.133726	1	0.00352536	0.103797	0.00498561	13485
YGFIEGNVVIPR	sp|P15379|CD44_MOUSE	-1.85156	-1.37089	0.0825044	1	0.0537248	0.0639228	0.160225	90030
LVINGGNGTVEDR	sp|P15379|CD44_MOUSE	-1.42021	-1.01376	0.116724	1	0.112379	0.105009	0.135486	11255
SQEMVHLVNKEPSETPDQC[+57]MTADETR	sp|P15379|CD44_MOUSE	-1.09292	-0.630834	0.210628	1	-0.0420414	0.112922	0.154029	27494
VSQVSHYIEPYLEFEAR	sp|P16297|IL2RB_MOUSE	-1.12854	-0.330499	0.202079	1	0.181969	0.153865	0.266013	128347
AVQLLLLQK	sp|P16297|IL2RB_MOUSE	-0.92259	-0.368751	0.293765	1	0.104558	0.144175	0.184613	55813
YLPALQGC[+57]R	sp|P24788|CD11B_MOUSE	-1.30667	-0.70965	0.162336	1	0.14644	0.11882	0.199008	60105
SVEEFQC[+57]LNR	sp|P24788|CD11B_MOUSE	-1.78088	-0.671844	0.220149	1	0.239522	0.0499714	0.36968	31513
IEEGTYGVVYR	sp|P24788|CD11B_MOUSE	-1.54327	-1.22756	0.0834534	1	0.0799555	0.0690323	0.105238	36966
EIVVGSNMDK	sp|P24788|CD11B_MOUSE	-1.4476	-1.01449	0.0738577	1	0.107395	0.0763642	0.144368	78161
FLTYYPGR	sp|P24788|CD11B_MOUSE	-1.16567	-0.609165	0.169849	1	0.134069	0.099763	0.185502	76811
NEWISYK	sp|P37217|CD69_MOUSE	-0.591474	-0.199694	0.241086	1	0.0855622	0.130593	0.121003	44837
SWALAQR	sp|P37217|CD69_MOUSE	-1.13628	-0.0178783	0.164825	1	0.281141	0.0546241	0.372801	46679
YSGELEHWIGLK	sp|P37217|CD69_MOUSE	-1.41705	-0.946825	0.133529	1	0.121698	0.110938	0.156743	50417
SSLVNESEGAAAGAGVPGPGVR	sp|Q00417|TCF7_MOUSE	-1.61203	-0.744099	0.847186	1	0.021856	0.289312	0.0918429	9302
VHGEAEGAPEALGR	sp|Q00417|TCF7_MOUSE	-1.05209	0	0.255538	1	0.256994	0.138482	0.376655	967
NVEAQSTEEMFVK	sp|Q61735|CD47_MOUSE	-2.30296	-1.88717	0.0936892	1	0.0685775	0.0705535	0.138599	103272
ISVSDLINGIASLK	sp|Q61735|CD47_MOUSE	-0.579582	0	0.482575	1	0.0522006	0.209528	0.0738228	3038
TVSWFSPNEK	sp|Q61735|CD47_MOUSE	-1.12223	-0.588515	0.30752	1	0.112732	0.177905	0.151248	31614
DKYENEDLIK	sp|Q78PG9|CCD25_MOUSE	-1.73435	-0.723365	0.151725	1	0.228518	0.0520604	0.336995	11474
MNNVNVVYTPWSNLK	sp|Q78PG9|CCD25_MOUSE	-1.19298	-0.554544	0.430779	1	0.103073	0.212811	0.199852	9717
TADMDVGQIGFHR	sp|Q78PG9|CCD25_MOUSE	-0.991452	0	0.230101	1	0.280175	0.141346	0.385145	15282
VFFYNPTTR	sp|Q8CGF7|TCRG1_MOUSE	-1.59729	-0.652524	0.32297	1	0.213023	0.169386	0.314923	152086
LSMWDRPDDLIGR	sp|Q8CGF7|TCRG1_MOUSE	-0.681123	-0.421957	0.0512043	1	0.0610858	0.0562865	0.0863884	48461
EALFNEFVAAAR	sp|Q8CGF7|TCRG1_MOUSE	-1.60181	-1.17344	0.0944404	1	0.0384712	0.0478672	0.142789	34246
ALLSDMVR	sp|Q8CGF7|TCRG1_MOUSE	-1.51008	-0.996461	0.164639	1	0.131053	0.0924771	0.171205	116728
YLVLDC[+57]VPEER	sp|Q8CGF7|TCRG1_MOUSE	-2.21247	-1.70851	0.0744209	1	0.131001	0.0830497	0.167987	75155

## Sheet: S3_100ngFOM
peptide	protein	lod	loq	r2	m	b	noiseStdev	linearStdev	max
IGGVQQDTILAEGLHFR	sp|O35129|PHB2_MOUSE	-1.69423	-1.02183	0.21494	1	0.0614415	0.104759	0.224132	2219983
LGLDYEER	sp|O35129|PHB2_MOUSE	-2.23858	-1.87117	0.072698	1	0.0821133	0.0678877	0.12247	3702042
VLPSIVNEVLK	sp|O35129|PHB2_MOUSE	-1.85335	-1.28282	0.150002	1	0.0999222	0.0974433	0.190178	3327065
FNASQLITQR	sp|O35129|PHB2_MOUSE	-2.15627	-1.63378	0.21055	1	0.0113343	0.174163	0.0743093	3873384
IVQAEGEAEAAK	sp|O35129|PHB2_MOUSE	-2.25981	-1.8838	0.0918418	1	0.0578726	0.0636919	0.125338	2006221
AHSQDENK	sp|A7XUX6|SKIT2_MOUSE	-1.25131	-0.724754	0.0963178	1	0.110772	0.0734243	0.175518	720443
VEMPDYHV	sp|D0QMC3|MNDAL_MOUSE	-0.490032	-0.197595	0.0852732	1	0.0689279	0.0685855	0.0974787	558846
HVMQLEK	sp|E9Q7E2|ARID2_MOUSE	-1.12439	-0.568021	0.0773729	1	0.0770652	0.0455345	0.185456	1092708
LPFPIIDDK	sp|O08709|PRDX6_MOUSE	-2.26618	-1.91129	0.0955965	1	0.0659258	0.100797	0.118295	5741754
AGGSASAMLQPLLDNQVGFK	sp|O09061|PSB1_MOUSE	-1.93172	-0.8613	0.353182	1	0.197257	0.125651	0.356807	905189
NMQNVEHVPLTLDR	sp|O09061|PSB1_MOUSE	-2.25001	-1.95627	0.0675315	1	-0.00723656	0.0630062	0.0979126	4369886
DGIDDESYEAIFKPVMSK	sp|O09106|HDAC1_MOUSE	-1.81033	-1.07378	0.214312	1	0.13152	0.108436	0.245516	872206
LQAQQDAVNIVC[+57]HSK	sp|O35226|PSMD4_MOUSE	-2.01995	-1.53426	0.168094	1	0.0563414	0.0841783	0.161897	1072473
VIDVFAMPQSGTGVSVEAVDPVFQAK	sp|O35593|PSDE_MOUSE	-0.626158	-0.481227	0.0519194	1	-0.0341606	0.0392697	0.0483103	371579
AFVEFLTDEIKEEK	sp|O35658|C1QBP_MOUSE	-1.20756	-0.614686	0.108665	1	0.11636	0.0528132	0.197623	572319
LPFTALGSGQGAAVALLEDR	sp|O35955|PSB10_MOUSE	-1.00469	-0.532693	0.279683	1	-4.45048e-06	0.157332	0.0130185	1096031
SSLNPILFR	sp|O54734|OST48_MOUSE	-2.15536	-1.58556	0.111948	1	0.123328	0.0793785	0.189935	6137868
NTLLIAGLQAR	sp|O54734|OST48_MOUSE	-1.78421	-1.24205	0.087895	1	0.0538693	0.0696773	0.180721	2812879
LPDVYGVFQFK	sp|O54734|OST48_MOUSE	-1.14227	-0.426057	0.172629	1	0.144351	0.0908328	0.238737	380330
DVTNNVHYENYR	sp|O55131|SEPT7_MOUSE	-2.61918	-1.77927	0.173613	1	0.146254	0.093685	0.279967	2312136
TTQVPQYILDDFIQNDR	sp|O70133|DHX9_MOUSE	-1.60375	-0.504814	0.152206	1	0.225362	0.0307265	0.366313	586952
AAEC[+57]NIVVTQPR	sp|O70133|DHX9_MOUSE	-2.48716	-2.18308	0.0723792	1	0.0331088	0.10136	0.0613744	2544081
ISAVAVAER	sp|O70133|DHX9_MOUSE	-1.39293	-0.965062	0.0592673	1	0.0982072	0.0373491	0.142622	2092012
LGGIGQFLAK	sp|O70133|DHX9_MOUSE	-1.80003	-0.250878	0.331177	1	0.371583	0.096097	0.516382	619197
YPSPFFVFGEK	sp|O70133|DHX9_MOUSE	-2.08104	-1.0849	0.282971	1	0.187381	0.0373909	0.332046	822185
LGFGSFVDK	sp|O70309|ITB5_MOUSE	-2.01746	-1.45846	0.14018	1	0.0941885	0.0346281	0.186332	1977958
AVENSSTAIGIR	sp|O70435|PSA3_MOUSE	-2.21007	-1.82027	0.119846	1	0.0503787	0.129936	0.117433	4775998
QIQELVEAIVLPMNHK	sp|O88685|PRS6A_MOUSE	-0.835686	-0.573905	0.12385	1	-0.00502361	0.0872604	0.00710446	201770
VDILDPALLR	sp|O88685|PRS6A_MOUSE	-2.32475	-1.88841	0.136985	1	0.0819155	0.107013	0.145448	5061478
VGQAVALR	sp|O88712|CTBP1_MOUSE	-1.38954	-0.667089	0.148617	1	0.17627	0.0683762	0.240818	1567656
HVFGQPAK	sp|O89053|COR1A_MOUSE	-2.73468	-2.18388	0.086767	1	0.0122873	0.0475521	0.1836	21562492
ADQC[+57]YEDVR	sp|O89053|COR1A_MOUSE	-2.96098	-2.49657	0.13787	1	0.0709181	0.0853242	0.154804	16682281
DGALIC[+57]TSC[+57]R	sp|O89053|COR1A_MOUSE	-2.92423	-2.37364	0.216346	1	0.0433934	0.183532	0.14016	42632656
RGLEVNK	sp|O89053|COR1A_MOUSE	-2.13952	-1.66242	0.0854402	1	0.0896055	0.066937	0.159033	19065504
DAGPLLISLK	sp|O89053|COR1A_MOUSE	-2.9451	-2.20394	0.333024	1	0.024367	0.247054	0.132726	42247496
TPQIQVYSR	sp|P01887|B2MG_MOUSE	-2.33626	-2.00717	0.053307	1	0.0722632	0.0415687	0.109698	4808204
HASMAEPK	sp|P01887|B2MG_MOUSE	-1.53754	-1.27229	0.0691391	1	-0.0447113	0.0730761	0.0884176	2129062
TPSALAILENANVLAR	sp|P05063|ALDOC_MOUSE	-1.17336	-0.623817	0.168172	1	0.115763	0.0955754	0.18318	272824
YSPEEIAMATVTALR	sp|P05063|ALDOC_MOUSE	-1.14083	-0.341573	0.0870109	1	0.186793	0.0320812	0.266418	568742
ELSDIAHR	sp|P05064|ALDOA_MOUSE	-2.44823	-2.08919	0.0390692	1	-0.100218	0.0507534	0.119681	17048816
LQSIGTENTEENRR	sp|P05064|ALDOA_MOUSE	-3.07402	-2.04701	0.565637	1	0.0100897	0.342338	0.118061	56300600
QLLLTADDR	sp|P05064|ALDOA_MOUSE	-2.38829	-2.08728	0.0789357	1	0.0471804	0.100335	0.0787747	19380140
ADDGRPFPQVIK	sp|P05064|ALDOA_MOUSE	-2.5875	-1.67601	0.144118	1	0.163376	0.0585204	0.303829	11908013
ALANSLAC[+57]QGK	sp|P05064|ALDOA_MOUSE	-3.08808	-2.02776	0.588247	1	0.036911	0.353441	0.118383	41378120
DFDQNQGEVVK	sp|P06240|LCK_MOUSE	-1.89312	-1.5041	0.216319	1	0.0636293	0.129672	0.103845	809667
ELFEADPER	sp|P06745|G6PI_MOUSE	-2.36878	-2.0045	0.107773	1	0.0942661	0.0987811	0.121426	11127092
DNMFSGSK	sp|P06745|G6PI_MOUSE	-1.83075	-1.29888	0.0654448	1	0.0907713	0.0375879	0.177288	2822676
INYTENR	sp|P06745|G6PI_MOUSE	-2.14347	-1.76274	0.0934875	1	0.0663308	0.0608497	0.126911	5807529
EWFLEAAK	sp|P06745|G6PI_MOUSE	-2.29747	-1.91588	0.103758	1	0.0417789	0.0803564	0.127194	5884593
VFEGNRPTNSIVFTK	sp|P06745|G6PI_MOUSE	-2.28247	-1.7068	0.229343	1	0.0361663	0.191889	0.0962239	11507768
DALNIETAVK	sp|P07356|ANXA2_MOUSE	-2.4763	-2.26713	0.046585	1	-0.0275996	0.0657059	0.0697228	10392162
GVDEVTIVNILTNR	sp|P07356|ANXA2_MOUSE	-1.62749	-1.32467	0.114665	1	0.0206044	0.100939	0.0371486	575110
QDIAFAYQR	sp|P07356|ANXA2_MOUSE	-2.06219	-1.79776	0.0616028	1	0.0324162	0.0540173	0.0881439	5390473
RAEDGSVIDYELIDQDAR	sp|P07356|ANXA2_MOUSE	-2.08737	-1.49855	0.119255	1	0.0888144	0.064246	0.196272	4708621
ELYDAGVK	sp|P07356|ANXA2_MOUSE	-2.44827	-2.19979	0.0508329	1	0.0189276	0.0828281	0.0463958	13326082
TDTGEPMGR	sp|P07901|HS90A_MOUSE	-2.12403	-1.59277	0.121055	1	0.0922714	0.0878301	0.177085	6174909
NPDDITNEEYGEFYK	sp|P07901|HS90A_MOUSE	-2.97578	-2.38851	0.258247	1	0.0886675	0.126998	0.195759	3458433
SLTNDWEEHLAVK	sp|P07901|HS90A_MOUSE	-2.17154	-1.8388	0.0713168	1	0.0122028	0.0337279	0.110914	3485420
APFDLFENR	sp|P07901|HS90A_MOUSE	-2.65107	-1.73952	0.162616	1	0.161703	0.00641656	0.303849	5574482
FYEQFSK	sp|P07901|HS90A_MOUSE	-2.15317	-1.72385	0.181574	1	0.0380672	0.143106	0.106737	7253736
DISPLLKDPDSFR	sp|P08030|APT_MOUSE	-1.87454	-1.26897	0.151762	1	0.111392	0.114674	0.201858	2493556
FAFQAEVNR	sp|P08113|ENPL_MOUSE	-2.39636	-1.7943	0.227443	1	0.0173501	0.200684	0.0752387	10422060
SILFVPTSAPR	sp|P08113|ENPL_MOUSE	-2.80708	-2.17634	0.131155	1	0.115136	0.0994756	0.210246	18565696
GLFDEYGSK	sp|P08113|ENPL_MOUSE	-2.12308	-1.77328	0.122388	1	0.059504	0.0851037	0.116601	6351707
IYFMAGSSR	sp|P08113|ENPL_MOUSE	-2.14058	-1.93676	0.0533911	1	0.0046631	0.0536852	0.0679403	6298558
EAESSPFVER	sp|P08113|ENPL_MOUSE	-2.56349	-2.27002	0.0773819	1	0.0261883	0.0978221	0.0652505	8910050
HVGDLGNVTAGK	sp|P08228|SODC_MOUSE	-3.10154	-2.71074	0.167618	1	-0.0271466	0.116181	0.130266	7646998
DGVANVSIEDR	sp|P08228|SODC_MOUSE	-2.23805	-1.85818	0.110909	1	0.0761136	0.11025	0.126624	8392780
VISLSGEHSIIGR	sp|P08228|SODC_MOUSE	-2.76747	-2.35868	0.100391	1	0.056344	0.136264	0.133499	14493990
YYVTIIDAPGHR	sp|P10126|EF1A1_MOUSE	-2.49116	-2.01854	0.159166	1	0.0320129	0.0466086	0.157537	17255932
C[+57]MPTFQFYK	sp|P10639|THIO_MOUSE	-1.83308	-1.36395	0.131558	1	0.0298472	0.0784143	0.156376	4076871
VGEFSGANK	sp|P10639|THIO_MOUSE	-2.50303	-2.23201	0.0649323	1	0.0328641	0.0903419	0.0528618	17552310
SLTNDWEDHLAVK	sp|P11499|HS90B_MOUSE	-2.27529	-1.94184	0.131038	1	0.0619162	0.104563	0.11115	5645781
APFDLFENK	sp|P11499|HS90B_MOUSE	-2.62337	-1.50252	0.296809	1	0.229416	0.0898796	0.373617	4506481
LGIHEDSTNR	sp|P11499|HS90B_MOUSE	-2.81826	-2.17124	0.114227	1	-0.130896	0.0139996	0.215673	7849973
HLEINPDHPIVETLR	sp|P11499|HS90B_MOUSE	-2.22017	-1.79676	0.0937246	1	-0.0517385	0.064664	0.141136	18716714
LGGDLLQALNEITESGR	sp|P11835|ITB2_MOUSE	-1.89659	-0.389996	0.699744	1	0.257382	0.166277	0.502197	586040
LGAILTPNDGR	sp|P11835|ITB2_MOUSE	-1.87001	-1.59926	0.102313	1	0.0413136	0.0902513	0.0536467	5304241
TNVLGHLQQGGAPTPFDR	sp|P12382|PFKAL_MOUSE	-2.08227	-1.2549	0.190151	1	0.170581	0.0848031	0.275789	1815920
ISMADYVSGELEHVTR	sp|P12382|PFKAL_MOUSE	-1.5829	-1.10692	0.35378	1	-0.102037	0.15866	0.119326	763044
GLQTSQDAR	sp|P14211|CALR_MOUSE	-2.70721	-2.15132	0.0962269	1	0.0823304	0.112146	0.185296	5211120
HEQNIDC[+57]GGGYVK	sp|P14211|CALR_MOUSE	-1.78373	-1.24388	0.0958463	1	0.0947829	0.0785655	0.179951	1532340
DMHGDSEYNIMFGPDIC[+57]GPGTK	sp|P14211|CALR_MOUSE	-2.4064	-2.0661	0.114211	1	0.0248417	0.0684835	0.113433	2373994
IKDPDAAKPEDWDER	sp|P14211|CALR_MOUSE	-2.76943	-2.154	0.167308	1	0.0688093	0.107019	0.205144	6544814
KPEDWDEEMDGEWEPPVIQNPEYK	sp|P14211|CALR_MOUSE	-2.91242	-1.81932	0.851828	1	0.143052	0.364366	0.272379	3639666
SLMPYFLLTQAVR	sp|P14685|PSMD3_MOUSE	-0.959956	-0.578194	0.306501	1	0.0767133	0.127254	0.124082	50663
MLITIMGTVKPNANR	sp|P16110|LEG3_MOUSE	-1.75856	-1.17033	0.128773	1	-0.0246686	0.0596786	0.196074	2787881
GNDVAFHFNPR	sp|P16110|LEG3_MOUSE	-2.28348	-1.98209	0.0599254	1	0.0624726	0.0599171	0.100464	5798937
QSAFPFESGKPFK	sp|P16110|LEG3_MOUSE	-1.9367	-1.43006	0.110136	1	0.0997829	0.0765373	0.168881	3161968
IQVLVEADHFK	sp|P16110|LEG3_MOUSE	-2.28217	-1.88908	0.15255	1	-0.0193264	0.131033	0.121818	2918962
VAVNDAHLLQYNHR	sp|P16110|LEG3_MOUSE	-2.13394	-1.56223	0.10729	1	0.0589306	0.010135	0.190567	2237975
DLASVQALLR	sp|P16546|SPTN1_MOUSE	-1.75535	-1.18338	0.24515	1	0.0162981	0.154247	0.190658	1220177
LVINGKPITIFQER	sp|P16858|G3P_MOUSE	-3.0907	-2.17548	0.478609	1	0.0711505	0.305074	0.14231	48983768
WGEAGAEYVVESTGVFTTMEK	sp|P16858|G3P_MOUSE	-1.32241	-0.972223	0.119535	1	0.0486476	0.095787	0.116728	1158112
QASEGPLK	sp|P16858|G3P_MOUSE	-2.29233	-2.0276	0.0804446	1	0.0438729	0.0882465	0.0769648	19291866
VVDLMAYMASKE	sp|P16858|G3P_MOUSE	-2.65095	-1.61134	0.526222	1	0.0119478	0.346535	0.166442	9359546
IIPGFMC[+57]QGGDFTR	sp|P17742|PPIA_MOUSE	-1.98044	-1.48896	0.1674	1	0.0934122	0.114818	0.163825	2149712
VKEGMNIVEAMER	sp|P17742|PPIA_MOUSE	-2.80345	-2.13834	0.274706	1	0.0196384	0.221703	0.163606	23425922
KITISDC[+57]GQL	sp|P17742|PPIA_MOUSE	-2.76803	-2.17436	0.162958	1	-0.0324594	0.114527	0.19789	18183752
SEGFDTYR	sp|P17918|PCNA_MOUSE	-2.80208	-2.16509	0.175727	1	0.104636	0.129935	0.212331	15702193
NLAMGVNLTSMSK	sp|P17918|PCNA_MOUSE	-2.05926	-1.75066	0.109303	1	-0.0516621	0.102868	0.0959622	4766487
DLSHIGDAVVISC[+57]AK	sp|P17918|PCNA_MOUSE	-2.47134	-2.2056	0.0733443	1	0.0218787	0.0634897	0.0885799	9143058
FSASGELGNGNIK	sp|P17918|PCNA_MOUSE	-2.90915	-2.37243	0.120145	1	0.0952568	0.0625215	0.178907	4528329
YLNFFTK	sp|P17918|PCNA_MOUSE	-2.28689	-1.82974	0.146913	1	0.0579921	0.0937975	0.152382	7027247
GGC[+57]EAIVDTGTSLLVGPVEEVK	sp|P18242|CATD_MOUSE	-2.02359	-1.70027	0.154649	1	0.0345398	0.104872	0.107772	2040488
AVLFC[+57]LSEDK	sp|P18760|COF1_MOUSE	-2.05276	-1.76265	0.0833702	1	0.0155914	0.0661803	0.0967042	2993662
AVLFC[+57]LSEDKK	sp|P18760|COF1_MOUSE	-2.76817	-2.23221	0.12376	1	0.0529324	0.11333	0.178656	9374234
HELQANC[+57]YEEVK	sp|P18760|COF1_MOUSE	-1.93638	-1.52993	0.0654932	1	0.0468701	0.0309527	0.135484	1820889
HELQANC[+57]YEEVKDR	sp|P18760|COF1_MOUSE	-2.64795	-1.71348	0.266333	1	0.136437	0.012247	0.311488	5429998
EAAQMDMVNDGVEDLR	sp|P19157|GSTP1_MOUSE	-2.8029	-2.1199	0.294751	1	0.095588	0.227668	0.196973	2070901
VTHAVVTVPAYFNDAQR	sp|P20029|BIP_MOUSE	-2.35158	-2.08834	0.0962708	1	0.0344414	0.0802788	0.0877468	6754275
IINEPTAAAIAYGLDKR	sp|P20029|BIP_MOUSE	-2.56191	-2.33379	0.0612652	1	0.0201705	0.0760394	0.0640216	10810060
SQIFSTASDNQPTVTIK	sp|P20029|BIP_MOUSE	-3.15819	-2.7262	0.167927	1	0.0786887	0.143997	0.135399	2994975
ITITNDQNR	sp|P20029|BIP_MOUSE	-2.94789	-2.36103	0.140151	1	0.114634	0.0072298	0.19562	9942987
IEWLESHQDADIEDFK	sp|P20029|BIP_MOUSE	-1.74256	-1.10798	0.281237	1	0.0838064	0.136164	0.211529	2080555
WAILGLGVR	sp|P21958|TAP1_MOUSE	-1.11102	-0.800659	0.171984	1	-0.0835001	0.0918731	0.103454	342552
NGQELPQKHDK	sp|P22646|CD3E_MOUSE	-0.707062	-0.211467	0.0396309	1	-0.116813	0.0264891	0.165199	34564
WKDSDEADLVLAK	sp|P23198|CBX3_MOUSE	-1.87602	-1.38877	0.0717117	1	0.0839181	0.0449583	0.162419	5297480
VFGFSLITNK	sp|P23492|PNPH_MOUSE	-1.68038	-1.5637	0.0204583	1	-0.0174449	0.0388933	0.0328573	1018903
TLHIFASEPVEEFVK	sp|P24063|ITAL_MOUSE	-1.27434	-0.932624	0.183394	1	-0.00783543	0.113904	0.0994967	1050576
DWAGGFLDLR	sp|P24063|ITAL_MOUSE	-1.68601	-1.11275	0.146269	1	0.0467287	0.093449	0.191087	952958
LADVVVGAEGR	sp|P24063|ITAL_MOUSE	-1.84847	-1.18117	0.0973965	1	0.110886	0.0241542	0.222433	3602625
GSPMEISLPIALSK	sp|P24527|LKHA4_MOUSE	-2.04428	-1.34646	0.192361	1	0.10782	0.118557	0.232608	1572379
ELVALMSAIR	sp|P24527|LKHA4_MOUSE	-1.80324	-1.35592	0.0768025	1	0.0413304	0.063023	0.149107	2196987
DLSSHQLNEFLAQVLQK	sp|P24527|LKHA4_MOUSE	-0.82569	-0.378834	0.318896	1	-0.0504265	0.148952	0.0713139	195873
FGVPVIADGGIQNVGHIAK	sp|P24547|IMDH2_MOUSE	-1.85785	-1.15823	0.311521	1	0.170499	0.1619	0.233208	3024225
VAQGVSGAVQDK	sp|P24547|IMDH2_MOUSE	-2.30118	-1.53506	0.418715	1	-0.0677946	0.0966784	0.255373	5121264
LGLGILNNAFR	sp|P25799|NFKB1_MOUSE	-1.86371	-0.620775	0.325078	1	0.212149	0.0991282	0.414312	365672
KEVVEEAENGR	sp|P26350|PTMA_MOUSE	-1.7779	-1.25801	0.255496	1	0.0861934	0.173296	0.160938	3169937
EVVEEAENGR	sp|P26350|PTMA_MOUSE	-3.02314	-2.41232	0.266817	1	0.0415882	0.203607	0.127111	31115748
RVAEDDEDDDVDTK	sp|P26350|PTMA_MOUSE	-1.88205	-0.887874	0.234191	1	0.266542	0.0878115	0.331391	1039735
VAEDDEDDDVDTKK	sp|P26350|PTMA_MOUSE	-2.41328	-1.72008	0.131751	1	0.20007	0.0817095	0.231067	9532893
VVGVLLGSWQK	sp|P26516|PSMD7_MOUSE	-1.9186	-1.61227	0.0916195	1	0.0506136	0.0923887	0.102112	1826789
YGVSGYPTLK	sp|P27773|PDIA3_MOUSE	-2.16634	-1.51402	0.182398	1	0.146025	0.0953282	0.217439	6421818
QAGPASVPLR	sp|P27773|PDIA3_MOUSE	-2.58661	-1.6462	0.227719	1	0.195087	0.143384	0.313468	6102371
DLFSDGHSEFLK	sp|P27773|PDIA3_MOUSE	-2.16783	-1.75231	0.179401	1	0.0297838	0.138506	0.0845652	4229073
LNFAVASR	sp|P27773|PDIA3_MOUSE	-2.24904	-1.90155	0.0924794	1	0.0607831	0.0834529	0.115829	12863602
FVMQEEFSR	sp|P27773|PDIA3_MOUSE	-2.79164	-2.02069	0.317039	1	0.0467156	0.256984	0.150661	12538386
ATAGSYISSLR	sp|P28063|PSB8_MOUSE	-2.23202	-1.83035	0.140529	1	0.0400693	0.13389	0.103407	6577286
KGPGLYYVDDNGTR	sp|P28063|PSB8_MOUSE	-1.35235	-0.891483	0.0864378	1	0.101202	0.0511804	0.153623	3503084
AIAYATHR	sp|P28063|PSB8_MOUSE	-1.6567	-0.709264	0.132407	1	0.187494	0.0441919	0.315813	2916620
VSAGTAVVNR	sp|P28076|PSB9_MOUSE	-1.77521	-1.02643	0.0898977	1	0.155807	0.0386704	0.249592	3921842
AGFWEEFESLQK	sp|P29351|PTN6_MOUSE	-1.21084	-0.747875	0.180403	1	0.0842908	0.105876	0.154321	358646
DSNIPGSDYINANYVK	sp|P29351|PTN6_MOUSE	-2.45762	-1.54566	0.176211	1	0.0928441	0.121788	0.303985	1540950
VYGLYSVTNSR	sp|P29351|PTN6_MOUSE	-2.5217	-2.21027	0.0847223	1	0.0324665	0.10381	0.0808461	3164151
KHPDSSVNFAEFSK	sp|P30681|HMGB2_MOUSE	-1.79106	-1.1639	0.277003	1	-0.0508954	0.141998	0.209053	7439783
SKFEDLAK	sp|P30681|HMGB2_MOUSE	-2.87976	-2.41391	0.0983207	1	-0.0240573	0.0319722	0.155284	18173570
IEHPGLSIGDTAK	sp|P30681|HMGB2_MOUSE	-2.70078	-1.92421	0.23341	1	0.121918	0.16137	0.258855	16696224
LGEMWSEQSAK	sp|P30681|HMGB2_MOUSE	-2.94921	-1.96021	0.561504	1	0.0169935	0.329665	0.152486	20884296
LHISPDR	sp|P34884|MIF_MOUSE	-2.51098	-1.24043	0.430312	1	0.28292	0.154702	0.423516	21204648
NEPQNAAGAPGR	sp|P35278|RAB5C_MOUSE	-2.33631	-1.91309	0.121625	1	0.0603893	0.0566376	0.141074	1215637
GVDLQESNPASR	sp|P35278|RAB5C_MOUSE	-2.19706	-1.62052	0.0472477	1	0.145998	0.0127501	0.192179	1130730
LAAAILGGVDQIHIKPGAK	sp|P35550|FBRL_MOUSE	-1.33378	-0.319929	0.244063	1	-0.213043	0.0496623	0.337951	2808857
TNIIPVIEDAR	sp|P35550|FBRL_MOUSE	-2.46319	-2.21913	0.0726552	1	0.0306468	0.0813555	0.0787816	14391562
SDASTPPSPK	sp|P35564|CALX_MOUSE	-2.54061	-1.42704	0.255159	1	0.215795	0.0842921	0.37119	6179347
TGVYEEK	sp|P35564|CALX_MOUSE	-1.27378	-0.54554	0.108555	1	0.192165	0.0432726	0.242748	2689066
EIEDPEDR	sp|P35564|CALX_MOUSE	-1.7117	-1.24491	0.285408	1	0.113011	0.154464	0.155597	5606296
VVDDWANDGWGLK	sp|P35564|CALX_MOUSE	-2.16308	-1.55512	0.123245	1	0.103006	0.0424834	0.202654	2355946
AEEDEILNR	sp|P35564|CALX_MOUSE	-1.8281	-1.35143	0.225089	1	0.102201	0.158891	0.157014	4840479
EAVGGLQTVR	sp|P36371|TAP2_MOUSE	-1.70625	-1.53021	0.0506568	1	0.0285976	0.0586793	0.0407543	4320700
SALFAQINQGESITHALK	sp|P40124|CAP1_MOUSE	-2.33876	-2.00817	0.130535	1	0.0252418	0.0947056	0.110198	3180354
KEPALLELEGK	sp|P40124|CAP1_MOUSE	-1.80346	-1.34641	0.134687	1	0.0661593	0.0965458	0.152349	4309661
NSLDC[+57]EIVSAK	sp|P40124|CAP1_MOUSE	-2.87375	-2.34196	0.210128	1	0.0571162	0.177265	0.161554	9672687
SSEMNVLIPTEGGDFNEFPVPEQFK	sp|P40124|CAP1_MOUSE	-2.17802	-1.5178	0.409658	1	0.119628	0.175497	0.220074	1195953
GLRPLDVAFLR	sp|P42209|SEPT1_MOUSE	-2.20286	-1.85539	0.0708979	1	0.0252802	0.0716536	0.115824	3441055
VNIIPVIGK	sp|P42209|SEPT1_MOUSE	-2.29103	-1.92416	0.126861	1	0.0686554	0.0931255	0.122292	5802734
FSLENNFLLQHNIR	sp|P42225|STAT1_MOUSE	-1.70828	-1.40231	0.0780077	1	-0.0608733	0.0585235	0.101988	1167159
LLGPNAGPDGLIPWTR	sp|P42225|STAT1_MOUSE	-2.54648	-1.52353	0.480445	1	0.196029	0.258486	0.340985	3621973
EAPEPMELDDPKR	sp|P42225|STAT1_MOUSE	-2.18626	-1.60577	0.112479	1	0.129496	0.0601117	0.193498	2665738
DVDEVSSLLR	sp|P42932|TCPQ_MOUSE	-2.72218	-1.99189	0.114763	1	0.130209	0.0139379	0.243431	8662464
VADIALHYANK	sp|P42932|TCPQ_MOUSE	-2.18081	-1.67433	0.0932816	1	0.118439	0.0869474	0.168826	1115412
YNIMLVR	sp|P42932|TCPQ_MOUSE	-1.95103	-1.17963	0.295863	1	0.126484	0.108884	0.257135	3734823
FAEAFEAIPR	sp|P42932|TCPQ_MOUSE	-2.64381	-1.75802	0.178774	1	0.171775	0.0537107	0.295262	6456997
LATNAAVTVLR	sp|P42932|TCPQ_MOUSE	-1.76133	-1.00564	0.103138	1	0.127767	0.043434	0.251898	4249668
ALDEGDIALLK	sp|P46471|PRS7_MOUSE	-1.66043	-1.3873	0.112286	1	0.0313722	0.0910412	0.0511409	2497813
GVLLFGPPGTGK	sp|P46471|PRS7_MOUSE	-1.96717	-1.26824	0.280671	1	0.124844	0.121684	0.232979	3732955
TDAC[+57]FIR	sp|P46471|PRS7_MOUSE	-1.84311	-1.26028	0.132422	1	0.0684753	0.0727092	0.194276	2845919
ESC[+57]DSALR	sp|P47753|CAZA1_MOUSE	-1.86284	-1.28786	0.206815	1	0.100762	0.11599	0.191661	3313215
EGAAHAFAQYNLDQFTPVK	sp|P47754|CAZA2_MOUSE	-1.71571	-1.33355	0.129413	1	0.0835206	0.0890729	0.127387	1136836
TSVETALR	sp|P47754|CAZA2_MOUSE	-2.15016	-1.85777	0.0804092	1	0.0630551	0.0974632	0.093944	6092924
LVEDMENK	sp|P47757|CAPZB_MOUSE	-2.27117	-1.96693	0.0370611	1	0.0359604	0.0206119	0.101412	6491462
STLNEIYFGK	sp|P47757|CAPZB_MOUSE	-2.19507	-1.74563	0.205418	1	0.0637102	0.149811	0.135586	6144959
LAQQYYLVYQEPIPTAQLVQR	sp|P49722|PSA2_MOUSE	-1.83671	-0.68934	0.628336	1	0.208597	0.250896	0.382455	1878179
LVGIVTSR	sp|P50096|IMDH1_MOUSE	-2.40874	-2.28971	0.0207631	1	0.0190248	0.0396766	0.039587	6854899
ARDDLITDLLNEAK	sp|P50518|VATE1_MOUSE	-1.2123	-0.732792	0.0942393	1	0.0831986	0.0524027	0.159835	474161
GDAMIMEETGK	sp|P50580|PA2G4_MOUSE	-2.76308	-2.04841	0.15114	1	0.0955607	0.048793	0.238223	5232020
LVKPGNQNTQVTEAWNK	sp|P50580|PA2G4_MOUSE	-2.50083	-2.30854	0.0228139	1	0.0214571	0.0105118	0.0640966	5488135
TIIQNPTDQQK	sp|P50580|PA2G4_MOUSE	-2.98928	-2.53275	0.158716	1	0.0709688	0.152179	0.12247	6948162
AFFSEVER	sp|P50580|PA2G4_MOUSE	-2.32474	-2.03129	0.104691	1	0.0570668	0.0978177	0.0903961	15354945
ALLQSSASR	sp|P50580|PA2G4_MOUSE	-2.14587	-1.80356	0.111289	1	0.0740978	0.0852934	0.114105	11287526
VIILGDSGVGK	sp|P51150|RAB7A_MOUSE	-2.47795	-2.06143	0.0740681	1	0.0908833	0.0300682	0.138843	5615685
NKNPAPPLDAVEQILPTLVR	sp|P52293|IMA1_MOUSE	-0.952367	-0.379702	0.398593	1	0.0268323	0.190888	0.101681	1684865
VIDAGALAVFPSLLTNPK	sp|P52293|IMA1_MOUSE	-1.55739	-0.565819	0.141992	1	0.182074	0.0501803	0.330524	388334
LDIDSAPITAR	sp|P52480|KPYM_MOUSE	-2.86756	-2.05758	0.348946	1	0.0567142	0.269992	0.144372	87234080
EATESFASDPILYRPVAVALDTK	sp|P52480|KPYM_MOUSE	-3.001	-2.17227	0.497695	1	0.0318151	0.276242	0.168838	40772464
KGVNLPGAAVDLPAVSEK	sp|P52480|KPYM_MOUSE	-2.58389	-2.21783	0.0931159	1	0.0398124	0.122019	0.070439	25526324
APIIAVTR	sp|P52480|KPYM_MOUSE	-2.90833	-2.41314	0.195306	1	0.0717799	0.165063	0.158678	94130248
ASGQAFELILSPR	sp|P54227|STMN1_MOUSE	-2.26741	-1.935	0.0786748	1	-0.0432333	0.110803	0.081163	5677307
ESVPDFPLSPPK	sp|P54227|STMN1_MOUSE	-1.65849	-0.886845	0.116025	1	0.135681	0.0563017	0.257215	6830495
SHEAEVLK	sp|P54227|STMN1_MOUSE	-2.07213	-1.84452	0.0609955	1	-0.0182668	0.0565279	0.0758703	5721740
AIEENNNFSK	sp|P54227|STMN1_MOUSE	-2.86071	-2.28018	0.192775	1	0.0983285	0.149211	0.193511	9126297
ATAPQTQHVSPMR	sp|P57776|EF1D_MOUSE	-1.88001	-1.4338	0.0433627	1	0.0670673	0.0247724	0.148738	4460247
STLTDSLVC[+57]K	sp|P58252|EF2_MOUSE	-2.99598	-2.43163	0.28747	1	0.0873326	0.188116	0.169899	24416702
GEGQLSAAER	sp|P58252|EF2_MOUSE	-2.70125	-2.10929	0.201521	1	0.0861767	0.19165	0.19732	15400146
FSVSPVVR	sp|P58252|EF2_MOUSE	-2.78272	-1.63274	0.881862	1	-0.041589	0.0939835	0.383327	29598258
DLEEDHAC[+57]IPIKK	sp|P58252|EF2_MOUSE	-1.84215	-1.21932	0.181525	1	0.0576019	0.102215	0.207609	5640480
EGALC[+57]EENMR	sp|P58252|EF2_MOUSE	-2.9975	-2.22548	0.3873	1	0.0456234	0.257339	0.140675	17169124
VLIEGSINSVR	sp|P59999|ARPC4_MOUSE	-2.64707	-1.90808	0.123816	1	0.0903994	0.0763632	0.24633	11766252
LDPSIFESLQK	sp|P60122|RUVB1_MOUSE	-1.9074	-1.17895	0.177546	1	0.163347	0.0872154	0.242815	1726198
ALESSIAPIVIFASNR	sp|P60122|RUVB1_MOUSE	-1.59692	-0.707119	0.167859	1	0.150798	0.0983124	0.2966	772886
VMTIPYQPMPASSPVIC[+57]AGGQDR	sp|P60335|PCBP1_MOUSE	-2.22996	-1.73113	0.238025	1	0.0904033	0.166278	0.159623	2987304
IANPVEGSSGR	sp|P60335|PCBP1_MOUSE	-2.78745	-2.07904	0.121238	1	0.139036	0.0500294	0.236138	11782864
TPFLLVGTQIDLR	sp|P60766|CDC42_MOUSE	-1.25154	-0.496942	0.322809	1	0.148595	0.109946	0.251534	449711
NVFDEAILAALEPPEPK	sp|P60766|CDC42_MOUSE	-2.24063	-1.7425	0.203158	1	0.0599091	0.125139	0.166044	4062469
ATQALVLAPTR	sp|P60843|IF4A1_MOUSE	-2.76932	-2.06816	0.106744	1	0.135097	0.0327071	0.23372	23695844
LQMEAPHIIVGTPGR	sp|P60843|IF4A1_MOUSE	-2.7085	-2.06311	0.126673	1	0.076371	0.0881254	0.215132	22768054
GFKDQIYDIFQK	sp|P60843|IF4A1_MOUSE	-2.08652	-1.34095	0.199452	1	0.0974065	0.0524395	0.248522	2577255
DFTVSAMHGDMDQK	sp|P60843|IF4A1_MOUSE	-2.26865	-1.83991	0.0736772	1	0.0920945	0.0383049	0.142915	4326586
TC[+57]DISFSDPDDLLNFK	sp|P61082|UBC12_MOUSE	-1.86201	-0.693644	0.745283	1	0.219023	0.303265	0.389456	347932
VDLVDENFTELR	sp|P61087|UBE2K_MOUSE	-1.34906	-1.06678	0.0885218	1	0.0533294	0.0940931	0.0843914	1455094
LLAEPVPGIK	sp|P61089|UBE2N_MOUSE	-2.44922	-2.16144	0.0596391	1	0.0124884	0.095928	0.0491929	12631416
TNEAQAIETAR	sp|P61089|UBE2N_MOUSE	-2.52301	-2.33098	0.0464289	1	0.025247	0.0543834	0.0640095	4337716
ILLTEPPMNPTK	sp|P61161|ARP2_MOUSE	-2.92318	-2.3519	0.227662	1	0.082949	0.190427	0.157029	10867649
GYAFNHSADFETVR	sp|P61161|ARP2_MOUSE	-1.8271	-1.29632	0.164055	1	0.0738837	0.12512	0.176928	3790331
HIVLSGGSTMYPGLPSR	sp|P61161|ARP2_MOUSE	-2.29641	-1.84955	0.204762	1	-0.0502367	0.126803	0.148952	9290030
VFVMPNGMLK	sp|P61290|PSME3_MOUSE	-2.20237	-0.381546	0.589696	1	0.359933	0.140706	0.606942	1590013
TVESEAASYLDQISR	sp|P61290|PSME3_MOUSE	-1.91249	-1.41634	0.179003	1	0.0964718	0.120403	0.165381	1171641
IDILDSALLRPGR	sp|P62196|PRS8_MOUSE	-2.18214	-1.81554	0.103357	1	0.0445137	0.0683202	0.122199	3629435
TLGEC[+57]GFTSQTARPQAPATVGLAFR	sp|P62869|ELOB_MOUSE	-2.56772	-2.26675	0.0707675	1	0.0166305	0.0476521	0.100321	1246023
ADDTFEALR	sp|P62869|ELOB_MOUSE	-2.22178	-1.62828	0.072588	1	0.13781	0.0270478	0.197834	3412916
AELNEFLTR	sp|P62908|RS3_MOUSE	-2.68483	-2.09868	0.0963307	1	0.0965122	0.110443	0.195384	24847672
TQNVLGEK	sp|P62908|RS3_MOUSE	-2.24577	-1.99985	0.0607968	1	0.00968851	0.0819726	0.040143	10707764
ELTAVVQK	sp|P62908|RS3_MOUSE	-2.36513	-1.99409	0.0917101	1	0.0870391	0.08291	0.123681	10890924
GC[+57]EVVVSGK	sp|P62908|RS3_MOUSE	-2.08324	-1.89258	0.0544005	1	0.00410754	0.0614214	0.0635523	9208100
EC[+57]PSDEC[+57]GAGVFMGSHFDR	sp|P62983|RS27A_MOUSE	-2.655	-1.83743	0.466703	1	-0.00338948	0.272524	0.247187	7076889
RFDDAVVQSDMK	sp|P63017|HSP7C_MOUSE	-2.4942	-2.3075	0.0351933	1	-0.0140678	0.0622334	0.0496039	19502540
EIAEAYLGK	sp|P63017|HSP7C_MOUSE	-3.01557	-2.3619	0.265982	1	0.0973834	0.00293088	0.21789	23786342
TVTNAVVTVPAYFNDSQR	sp|P63017|HSP7C_MOUSE	-2.92485	-2.26915	0.153506	1	0.135021	0.0177617	0.218567	11551684
GTLDPVEK	sp|P63017|HSP7C_MOUSE	-2.73589	-1.95563	0.131292	1	0.178075	0.0906262	0.260086	33666868
SQIHDIVLVGGSTR	sp|P63017|HSP7C_MOUSE	-2.53299	-2.3257	0.0473714	1	0.0320393	0.0545836	0.0690954	42585372
DLISHDELFSDIYK	sp|P63028|TCTP_MOUSE	-2.9662	-2.352	0.284312	1	0.10185	0.150672	0.204731	6090841
GKLEEQKPER	sp|P63028|TCTP_MOUSE	-1.83658	-1.46786	0.0801564	1	0.0386598	0.075556	0.122904	3883045
LEEQKPER	sp|P63028|TCTP_MOUSE	-1.97555	-1.66742	0.0745577	1	-0.0325039	0.061508	0.102711	1379149
DGLEMEK	sp|P63028|TCTP_MOUSE	-1.68093	-0.956015	0.0914559	1	0.113045	0.0550792	0.241639	3546698
DAVTHIGR	sp|P63073|IF4E_MOUSE	-1.61746	-1.40023	0.0653172	1	0.0343741	0.0724075	0.0490895	2184271
NYLLSLPHK	sp|P63085|MK01_MOUSE	-1.49058	-1.12042	0.125726	1	0.0151365	0.0549708	0.123386	2332864
YDDMAAC[+57]MK	sp|P63101|1433Z_MOUSE	-2.89699	-2.64979	0.0252751	1	-0.00661729	0.0251657	0.0824001	13328612
YLAEVAAGDDKK	sp|P63101|1433Z_MOUSE	-2.34315	-2.00604	0.0591955	1	0.0784327	0.049184	0.112369	5541516
GIVDQSQQAYQEAFEISK	sp|P63101|1433Z_MOUSE	-1.84022	-1.2873	0.177316	1	0.1134	0.149559	0.184307	1637471
TAFDEAIAELDTLSEESYK	sp|P63101|1433Z_MOUSE	-2.26025	-1.71123	0.324305	1	-0.0110185	0.183006	0.166455	1940372
GQVC[+57]LPVISAENWKPATK	sp|P68037|UB2L3_MOUSE	-2.21928	-1.79343	0.141999	1	0.0585768	0.14195	0.138162	2838937
ADLAEEYSK	sp|P68037|UB2L3_MOUSE	-1.83425	-1.08188	0.108146	1	0.158676	0.0289606	0.25079	3027852
AVFVDLEPTVIDEIR	sp|P68368|TBA4A_MOUSE	-1.44547	-1.11267	0.145446	1	-0.0233196	0.110933	0.101927	295331
EIIDPVLDR	sp|P68368|TBA4A_MOUSE	-2.29012	-1.89741	0.0623821	1	0.081833	0.0348671	0.130903	10715942
AAVENLPTFLVELSR	sp|P70168|IMB1_MOUSE	-1.17118	-0.81546	0.174537	1	0.0168447	0.118572	0.037773	545740
SDFDMVDYLNELR	sp|P70168|IMB1_MOUSE	-0.713116	0	1.12062	1	0.0132215	0.27755	0.018698	313767
SGTDVDAANLR	sp|P70677|CASP3_MOUSE	-1.51186	-1.01494	0.0856337	1	0.117567	0.0494741	0.16564	4617609
EDILELMDSVSK	sp|P70677|CASP3_MOUSE	-2.09807	-1.24383	0.333676	1	0.172982	0.175437	0.284745	985640
LFIIQAC[+57]R	sp|P70677|CASP3_MOUSE	-1.99933	-1.61185	0.146026	1	0.0561625	0.0797147	0.129161	4336853
EALLSSAVDHGSDEAR	sp|P80314|TCPB_MOUSE	-2.43052	-1.96443	0.0840715	1	0.103321	0.0202159	0.155361	7611476
LAVEAVLR	sp|P80314|TCPB_MOUSE	-2.27003	-1.82922	0.203985	1	-0.00703093	0.146937	0.111286	4811782
HGINC[+57]FINR	sp|P80314|TCPB_MOUSE	-1.2165	-0.663413	0.0925479	1	-0.112441	0.0518615	0.184362	1445296
SLHDALC[+57]VLAQTVK	sp|P80314|TCPB_MOUSE	-1.94724	-1.47894	0.111396	1	0.031129	0.0485033	0.156102	2688805
EAVAMESFAK	sp|P80314|TCPB_MOUSE	-2.09266	-1.73624	0.196296	1	0.031304	0.118804	0.109871	5046319
EVFAEAVR	sp|P84096|RHOG_MOUSE	-1.36048	-1.00685	0.0764442	1	0.0813091	0.0635311	0.117878	3012310
TENLLGSYFPK	sp|P97371|PSME1_MOUSE	-2.33019	-1.93871	0.12972	1	0.066781	0.097793	0.130491	6214253
DEAAYGALR	sp|P97372|PSME2_MOUSE	-1.99024	-1.52063	0.22477	1	0.0840806	0.139454	0.156537	7659142
GFGTDEQAIIDC[+57]LGSR	sp|P97384|ANX11_MOUSE	-1.54046	-1.16491	0.169313	1	0.0573895	0.125184	0.106144	556663
SELDLLDIR	sp|P97384|ANX11_MOUSE	-1.87552	-1.36334	0.0728224	1	0.0701334	0.0275972	0.170727	1376866
ISVYYNEATGGK	sp|P99024|TBB5_MOUSE	-3.04887	-2.12927	0.487272	1	0.0422154	0.306532	0.133041	23621102
MAVTFIGNSTAIQELFK	sp|P99024|TBB5_MOUSE	-1.63932	0	0.613195	1	0.333041	0.0944224	0.600563	299799
FQIATVTEK	sp|P99026|PSB4_MOUSE	-2.10614	-1.6322	0.227595	1	0.041285	0.157979	0.0935683	5450237
DRPFFPGLVK	sp|Q01768|NDKB_MOUSE	-2.0527	-1.69133	0.0900667	1	0.00223613	0.0406523	0.120458	5066213
NIIHGSDSVESAEK	sp|Q01768|NDKB_MOUSE	-2.73842	-1.92698	0.158278	1	0.173578	0.0881195	0.270479	7549623
MDELQLFR	sp|Q01853|TERA_MOUSE	-2.06407	-1.799	0.0535356	1	0.0141916	0.0429278	0.0883581	4821321
EMVELPLR	sp|Q01853|TERA_MOUSE	-1.97889	-1.69715	0.0617427	1	0.0347886	0.0499709	0.0939135	7698195
EVDIGIPDATGR	sp|Q01853|TERA_MOUSE	-2.25312	-1.69238	0.23291	1	0.120681	0.186913	0.163764	7764867
ELQELVQYPVEHPDK	sp|Q01853|TERA_MOUSE	-2.25141	-1.8954	0.0835084	1	0.0586017	0.09422	0.118671	4318564
GGNIGDGGGAADR	sp|Q01853|TERA_MOUSE	-2.77725	-2.02653	0.145727	1	0.156149	0.0893978	0.250241	5587698
YDGQVAVFGSDFQEK	sp|Q02053|UBA1_MOUSE	-2.65087	-1.95761	0.112566	1	0.117501	0.101596	0.231087	1916416
SDTAAAAVR	sp|Q02053|UBA1_MOUSE	-2.14358	-1.36429	0.141348	1	0.207986	0.081477	0.259764	3635735
LAGTQPLEVLEAVQR	sp|Q02053|UBA1_MOUSE	-1.8511	-1.38265	0.174009	1	0.0993865	0.143017	0.15615	1851565
AAVASLLQSVQVPEFTPK	sp|Q02053|UBA1_MOUSE	-1.93677	-1.42771	0.115332	1	0.100546	0.0650212	0.169687	2279202
SMQNWHQLENLSNFIK	sp|Q08093|CNN2_MOUSE	-0.934635	-0.461711	0.289479	1	-0.111469	0.121522	0.157642	227037
DLISYLEK	sp|Q3TBD2|HMHA1_MOUSE	-2.04477	-1.7812	0.039626	1	0.0504346	0.0371954	0.0878581	1420351
MMLDDIVSR	sp|Q3U0V1|FUBP2_MOUSE	-1.81416	-1.30822	0.15626	1	0.0596725	0.103568	0.168649	2893543
MILIQDGSQNTNVDKPLR	sp|Q3U0V1|FUBP2_MOUSE	-2.19327	-1.64644	0.134469	1	0.047031	0.0284317	0.182277	1992298
VGGGIDVPVPR	sp|Q3U0V1|FUBP2_MOUSE	-1.93487	-1.37754	0.0918828	1	0.124846	0.0434451	0.185777	3728768
NAYTPQEIMGGIPNSEHLLPELLK	sp|Q571E4|GALNS_MOUSE	-2.19393	-1.57241	0.279445	1	0.0643954	0.116119	0.207172	731426
LAAIQESGVER	sp|Q60692|PSB6_MOUSE	-1.89041	-1.53817	0.0644868	1	0.0637993	0.0563673	0.117414	1871673
SLAPLDREPFILGK	sp|Q60787|LCP2_MOUSE	-1.85385	-1.31152	0.241451	1	0.0980978	0.144784	0.180776	1606379
SPDGAHLTWEPPSVTSGK	sp|Q61191|HCFC1_MOUSE	-1.51779	-1.33574	0.0510688	1	0.0468636	0.0606815	0.0582984	1128426
IIVLGLLPR	sp|Q61206|PA1B2_MOUSE	-1.80856	-1.30276	0.121746	1	0.0392469	0.07115	0.1686	1562312
SNLAYDIVQLPTGLTGIK	sp|Q61316|HSP74_MOUSE	-1.44675	-1.02035	0.167765	1	0.0289012	0.142134	0.0483262	713471
VLATAFDTTLGGR	sp|Q61316|HSP74_MOUSE	-2.14638	-1.81105	0.134016	1	0.049406	0.094891	0.111779	2609157
AENEALAMQK	sp|Q61335|BAP31_MOUSE	-1.88331	-1.40885	0.1266	1	0.101927	0.100763	0.158152	2901694
FKLPGQPPASMGR	sp|Q61598|GDIB_MOUSE	-1.78249	-1.19406	0.0508098	1	0.0885972	0.00450029	0.196142	3905167
MLLFTEVTR	sp|Q61598|GDIB_MOUSE	-1.3919	-1.05719	0.179133	1	0.0226349	0.11157	0.0786134	2031395
EIRPALELLEPIEQK	sp|Q61598|GDIB_MOUSE	-1.87031	-1.52289	0.131144	1	0.0590521	0.103946	0.115807	3739963
FVSISDLFVPK	sp|Q61598|GDIB_MOUSE	-2.78852	-2.19918	0.111842	1	0.0878499	0.0718311	0.196448	2803438
TVSLGAGAK	sp|Q61937|NPM_MOUSE	-2.18387	-1.6612	0.138468	1	0.0794456	0.0663353	0.174225	10261180
DELHIVEAEAMNYEGSPIK	sp|Q61937|NPM_MOUSE	-2.08039	-1.34272	0.435052	1	0.09589	0.245889	0.22785	3512579
MSVQPTVSLGGFEITPPVVLR	sp|Q61937|NPM_MOUSE	-2.2647	-1.57479	0.230526	1	-0.132281	0.0764738	0.229972	7531668
GPSSVEDIK	sp|Q61937|NPM_MOUSE	-2.77023	-2.28313	0.109145	1	0.0820709	0.134824	0.162366	24615304
MQASIEK	sp|Q61937|NPM_MOUSE	-2.00564	-1.65193	0.0875008	1	0.0592816	0.0792297	0.117904	9210423
VRPC[+57]VVYGGAEIGQQIR	sp|Q62167|DDX3X_MOUSE	-1.49519	-0.498602	0.268628	1	0.172173	0.115155	0.332195	1109547
GLSFLFPLLK	sp|Q62448|IF4G2_MOUSE	-1.37065	-1.08026	0.115585	1	-0.0164704	0.096797	0.0957056	340242
RPISADSAIMNPASK	sp|Q68FD5|CLH1_MOUSE	-1.50111	-1.19887	0.0988348	1	0.0617177	0.0969803	0.100747	2418332
LHIIEVGTPPTGNQPFPK	sp|Q68FD5|CLH1_MOUSE	-2.10952	-1.35872	0.448148	1	0.0152028	0.250266	0.0900727	5390687
AHIAQLC[+57]EK	sp|Q68FD5|CLH1_MOUSE	-2.27595	-1.66259	0.0903685	1	0.173753	0.0614817	0.204453	1949189
ESNC[+57]YDPER	sp|Q68FD5|CLH1_MOUSE	-2.00516	-1.55186	0.0912634	1	0.0827792	0.0304024	0.1511	2597489
LASTLVHLGEYQAAVDGAR	sp|Q68FD5|CLH1_MOUSE	-1.63182	-0.727418	0.209342	1	0.180123	0.106366	0.301467	1508307
EAVGDLLDAFK	sp|Q6NZJ6|IF4G1_MOUSE	-1.78735	-1.31575	0.0764767	1	0.053557	0.0724481	0.1572	983106
GVIDLIFEK	sp|Q6NZJ6|IF4G1_MOUSE	-1.70674	-1.15614	0.107778	1	0.0403861	0.0732927	0.183532	431538
IGVMSLIR	sp|Q6PDQ2|CHD4_MOUSE	-1.43537	-1.18166	0.0883785	1	0.0504864	0.0619338	0.0845714	1250352
IESFVVEDIVSGVQNR	sp|Q6Q899|DDX58_MOUSE	-0.953172	-0.340378	0.293958	1	0.129283	0.118001	0.204264	255688
SALASVIMGLSPILGK	sp|Q76MZ3|2AAA_MOUSE	-1.58617	-1.00507	0.189001	1	-0.134619	0.0941741	0.193698	154889
IGPILDNSTLQSEVKPILEK	sp|Q76MZ3|2AAA_MOUSE	-2.25199	-1.38473	0.540794	1	0.103632	0.289087	0.155541	3657082
TEIVPLFTNLASDEQDSVR	sp|Q7TNP2|2AAB_MOUSE	-1.29965	-0.86202	0.220116	1	0.0561096	0.128993	0.145875	278762
LITGLGVGR	sp|Q7TPV4|MBB1A_MOUSE	-1.50557	-1.07697	0.248357	1	0.100489	0.142868	0.135879	2091314
LVQLADMLLNHNR	sp|Q7TPV4|MBB1A_MOUSE	-2.06024	-1.55384	0.297632	1	0.0275261	0.168799	0.127149	1543913
ALDLIEVLVTK	sp|Q7TPV4|MBB1A_MOUSE	-1.1745	-0.414916	0.104263	1	0.175522	0.0773023	0.253196	263841
VYSASLESLLTK	sp|Q7TPV4|MBB1A_MOUSE	-2.19474	-1.84183	0.144906	1	0.0552545	0.117637	0.106242	1592859
STLINTLFK	sp|Q80UG5|SEPT9_MOUSE	-2.54437	-1.71564	0.13996	1	0.127267	0.102316	0.276246	4264090
LTVIDTPGFGDHINNENC[+57]WQPIMK	sp|Q80UG5|SEPT9_MOUSE	-2.78543	-2.02161	0.168341	1	0.149938	0.0536346	0.254605	884319
VVNIVPVIAK	sp|Q80UG5|SEPT9_MOUSE	-2.11727	-1.82674	0.0427974	1	0.0419376	0.0237902	0.0968448	5062316
AQSLLSTDR	sp|Q8BG32|PSD11_MOUSE	-2.1503	-1.65097	0.0563182	1	0.103863	0.054325	0.166443	2400297
LYDNLLEQNLIR	sp|Q8BG32|PSD11_MOUSE	-2.2221	-1.43958	0.309303	1	0.166676	0.112268	0.260843	795746
VATVPQHATSGPGPADVSK	sp|Q8BTM8|FLNA_MOUSE	-2.71016	-1.90194	0.193904	1	0.144478	0.122405	0.269407	2709642
SDPFLEFFR	sp|Q8C166|CPNE1_MOUSE	-1.38371	-1.01996	0.0775347	1	0.0540601	0.0365626	0.121248	643793
IFLIC[+57]QIVR	sp|Q8C3J5|DOCK2_MOUSE	-1.56348	-1.23274	0.159517	1	-0.00189186	0.110245	0.0333733	841428
YIPSVLHDVETVFDAK	sp|Q8C3J5|DOCK2_MOUSE	-1.05105	-0.671177	0.141569	1	-0.0289758	0.126624	0.0422515	194550
IGPITPLQFYK	sp|Q8R016|BLMH_MOUSE	-2.52548	-1.71983	0.16037	1	0.115703	0.137	0.268548	3008368
AETLMTVTDPVHDIAFAPNLGR	sp|Q8R2U0|SEH1_MOUSE	-1.49254	-1.17005	0.17228	1	0.0437788	0.107498	0.0924229	349977
NLAPTPRR	sp|Q8R3Y8|I2BP1_MOUSE	-2.64565	-2.01416	0.156568	1	0.0637374	0.146923	0.210496	17193432
IDLAGSALSGILDKDLSDR	sp|Q8R550|SH3K1_MOUSE	-1.82938	-1.22972	0.401074	1	0.0224278	0.199884	0.196028	821870
VMAGALEGDLFIGPK	sp|Q8R5C5|ACTY_MOUSE	-1.12244	-0.162061	0.727562	1	0.211946	0.266462	0.320125	331944
TDLLLEPYNK	sp|Q8VDD5|MYH9_MOUSE	-2.5408	-2.28689	0.0626407	1	0.0531299	0.0846366	0.0803206	11724853
ALELDSNLYR	sp|Q8VDD5|MYH9_MOUSE	-2.3384	-2.00017	0.0744928	1	0.0502208	0.0426733	0.112744	7458242
HSQAVEELADQLEQTK	sp|Q8VDD5|MYH9_MOUSE	-1.65321	-1.37195	0.177319	1	-0.0310259	0.0937548	0.0677026	3580087
DLEGLSQR	sp|Q8VDD5|MYH9_MOUSE	-2.28909	-1.8348	0.0657568	1	0.103258	0.0170717	0.151428	10706756
LQQELDDLLVDLDHQR	sp|Q8VDD5|MYH9_MOUSE	-2.34919	-1.78944	0.320202	1	-0.0130072	0.151055	0.186583	6260174
WLPLGLGLNHLGK	sp|Q8VDM4|PSMD2_MOUSE	-1.41069	-0.762961	0.125043	1	-0.164011	0.0559698	0.215908	349585
AVPLALALISVSNPR	sp|Q8VDM4|PSMD2_MOUSE	-1.37915	-1.02106	0.229857	1	0.010446	0.119363	0.0505397	414322
LNILDTLSK	sp|Q8VDM4|PSMD2_MOUSE	-2.18409	-1.55729	0.132623	1	0.110137	0.0623546	0.208931	2169697
NGQDLGVAFK	sp|Q8VEK3|HNRPU_MOUSE	-2.17192	-1.83775	0.135711	1	0.0432746	0.11139	0.0898275	5349037
KDC[+57]EVVMMIGLPGAGK	sp|Q8VEK3|HNRPU_MOUSE	-1.24487	-0.838075	0.0474737	1	0.0681055	0.0347475	0.135598	2351125
YNILGTNTIMDK	sp|Q8VEK3|HNRPU_MOUSE	-2.91836	-2.40806	0.207864	1	0.0403118	0.136935	0.170099	17212560
MC[+57]LFAGFQR	sp|Q8VEK3|HNRPU_MOUSE	-2.08267	-1.56139	0.176366	1	0.00954721	0.129428	0.17376	6119053
DLPEHAVLK	sp|Q8VEK3|HNRPU_MOUSE	-2.14595	-1.63171	0.0999324	1	0.0786277	0.0480605	0.171412	4831745
DGVYILDLAAK	sp|Q91V92|ACLY_MOUSE	-1.67016	-1.00485	0.238222	1	0.118519	0.109206	0.22177	775917
EILIPVFK	sp|Q91V92|ACLY_MOUSE	-2.20246	-1.66119	0.204601	1	0.122833	0.165488	0.180422	1994627
GVTIIGPATVGGIKPGC[+57]FK	sp|Q91V92|ACLY_MOUSE	-1.51402	-1.07071	0.304052	1	0.044249	0.14777	0.0541286	1736681
KLDYGQHVVAGTPGR	sp|Q91VC3|IF4A3_MOUSE	-1.34741	-0.937176	0.114629	1	0.0936868	0.0805508	0.136745	2428595
EQIYDVYR	sp|Q91VC3|IF4A3_MOUSE	-1.972	-1.5672	0.0982534	1	0.0748123	0.0830353	0.134935	3957406
EANFTVSSMHGDMPQK	sp|Q91VC3|IF4A3_MOUSE	-1.53612	-1.33103	0.0564292	1	-0.00718325	0.0409703	0.0683631	1958209
GIDIHGVPYVINVTLPDEK	sp|Q91VR5|DDX1_MOUSE	-1.3571	-1.08424	0.0584728	1	-0.0479226	0.0567671	0.090955	592285
YPDLNLLR	sp|Q99388|CSPRS_MOUSE	-1.60918	-0.727023	0.124309	1	0.157634	0.0595246	0.294052	2159615
VKDTDDVPMILVGNK	sp|Q99JI6|RAP1B_MOUSE	-1.95631	-1.37861	0.180734	1	0.0824234	0.0868798	0.192564	2956562
FMEQVIFK	sp|Q99JY9|ARP3_MOUSE	-1.7419	-1.27088	0.228049	1	0.00926957	0.157008	0.152781	3278912
YSYVC[+57]PDLVK	sp|Q99JY9|ARP3_MOUSE	-2.24317	-1.96945	0.0813235	1	0.0430961	0.0730759	0.0912416	6612372
QYTGVNAISK	sp|Q99JY9|ARP3_MOUSE	-1.99536	-1.53309	0.21805	1	0.0344799	0.154091	0.0659925	1924032
LSEELSGGR	sp|Q99JY9|ARP3_MOUSE	-2.23941	-1.27468	0.551289	1	0.106151	0.321575	0.15083	7199211
GAEEMETVIPVDVMR	sp|Q99LX0|PARK7_MOUSE	-1.56753	-1.16281	0.176362	1	0.0754536	0.134906	0.108038	1501632
VTVAGLAGK	sp|Q99LX0|PARK7_MOUSE	-2.22969	-1.90639	0.122025	1	0.0357735	0.107766	0.073248	5854577
TQGPYDVVVLPGGNLGAQNLSESPMVK	sp|Q99LX0|PARK7_MOUSE	-2.30121	-1.65274	0.28401	1	0.157049	0.173091	0.216154	3097550
VTTHPLAK	sp|Q99LX0|PARK7_MOUSE	-1.54123	-0.368478	0.190439	1	0.220485	0.0451586	0.390918	1845907
QGNMTAALQAALK	sp|Q9CPW4|ARPC5_MOUSE	-2.12991	-1.38465	0.357502	1	0.132051	0.21959	0.248419	1734014
ALAAGGVGSIVR	sp|Q9CPW4|ARPC5_MOUSE	-2.73395	-2.16899	0.067461	1	0.0788942	0.033058	0.188319	12707863
FTTGDAMSK	sp|Q9CQI6|COTL1_MOUSE	-2.19225	-1.77499	0.111271	1	0.076403	0.0787066	0.139088	4686487
EVVQNFAK	sp|Q9CQI6|COTL1_MOUSE	-2.77834	-1.90119	0.278697	1	0.16809	0.140691	0.292385	7416218
EFVISDR	sp|Q9CQI6|COTL1_MOUSE	-2.5756	-2.39991	0.0292106	1	-0.0302826	0.0585629	0.0418016	19904286
ELEEDFIR	sp|Q9CQI6|COTL1_MOUSE	-2.53832	-1.73984	0.236184	1	0.13087	0.19022	0.266161	12901647
AVTEQGHELSNEER	sp|Q9CQV8|1433B_MOUSE	-2.73488	-2.56264	0.0274444	1	-0.00966475	0.0319762	0.0574156	5466620
MILLEVNNR	sp|Q9CVB6|ARPC2_MOUSE	-2.19568	-1.82671	0.0732674	1	0.00310754	0.029981	0.122989	3222257
ASHTAPQVLFSHR	sp|Q9CVB6|ARPC2_MOUSE	-1.99068	-1.55433	0.139058	1	0.0305702	0.0675418	0.14545	3588939
DNTINLIHTFR	sp|Q9CVB6|ARPC2_MOUSE	-2.26649	-1.73237	0.24221	1	0.10203	0.132309	0.178039	4114708
NIFDFNALK	sp|Q9D0F9|PGM1_MOUSE	-1.85352	-1.32456	0.0828359	1	0.0958785	0.0492546	0.176319	969792
INQDPQVMLAPLISIALK	sp|Q9D0F9|PGM1_MOUSE	-0.954272	-0.761906	0.037297	1	0.0461787	0.0463517	0.0641218	99621
DVAWAPSIGLPTSTIASC[+57]SQDGR	sp|Q9D1M0|SEC13_MOUSE	-1.82865	-1.18515	0.387138	1	0.145904	0.182788	0.2145	604201
TASDMVSTSR	sp|Q9D8W5|PSD12_MOUSE	-2.17396	-1.58799	0.116461	1	0.112729	0.0499788	0.195322	1801262
AIYDTPC[+57]IQAESDKWQQALK	sp|Q9D8W5|PSD12_MOUSE	-2.36547	-1.14155	0.314751	1	0.208198	0.145438	0.407973	1949320
LNSLMSLVNK	sp|Q9D8W5|PSD12_MOUSE	-1.85655	-1.44849	0.0736316	1	0.0701426	0.0758347	0.136021	1797933
FSGWYDADLSPAGHEEAK	sp|Q9DBJ1|PGAM1_MOUSE	-1.80725	-1.20283	0.147955	1	0.0970729	0.0844491	0.201474	4461994
SYDVPPPPMEPDHPFYSNISK	sp|Q9DBJ1|PGAM1_MOUSE	-2.68511	-2.05673	0.0908499	1	0.0836241	0.0741292	0.20946	8914574
ALPFWNEEIVPQIK	sp|Q9DBJ1|PGAM1_MOUSE	-1.62868	-0.762499	0.133162	1	0.180716	0.0738402	0.288726	1533953
DAILDALENLSGDELKK	sp|Q9EPB4|ASC_MOUSE	-1.91192	-1.10497	0.264869	1	0.0919461	0.152342	0.268984	551249
VTEVDGVLDALHGSVLTEGQYQAVR	sp|Q9EPB4|ASC_MOUSE	-1.68389	-1.03803	0.237996	1	0.0649422	0.134033	0.215288	646164
TQEFPHILTLIGR	sp|Q9EQH2|ERAP1_MOUSE	-1.78141	-1.04017	0.15726	1	0.106676	0.0631514	0.247081	1219135
VTQWAEER	sp|Q9EQW7|KI13A_MOUSE	-2.2521	-1.8568	0.0547279	1	0.0899505	0.0323206	0.131765	16199499
DLFQVAFNR	sp|Q9JHU4|DYHC1_MOUSE	-0.858797	-0.152224	0.115356	1	0.168201	0.0659399	0.235524	429409
LKEAELLEPLMPAIR	sp|Q9JIF7|COPB_MOUSE	-1.32427	-0.841226	0.0903837	1	0.0922177	0.0400238	0.161015	881797
TFSFAIPLIEK	sp|Q9JIK5|DDX21_MOUSE	-2.17446	-1.67387	0.215386	1	0.0772137	0.149762	0.166863	2524800
APQVLVLAPTR	sp|Q9JIK5|DDX21_MOUSE	-2.13308	-1.59413	0.109981	1	0.105173	0.0662761	0.179649	5869605
SGIDILVGTPGR	sp|Q9JIK5|DDX21_MOUSE	-1.51241	-1.17722	0.176803	1	-0.00183579	0.11173	0.0393519	2620303
AAVIGDVIR	sp|Q9JIK5|DDX21_MOUSE	-1.86803	-1.14585	0.220279	1	0.155829	0.109487	0.240726	6706338
TEAVTEIQEK	sp|Q9JIK5|DDX21_MOUSE	-2.18965	-1.68184	0.120636	1	0.130228	0.107333	0.169269	2655567
LIGNMALLPLR	sp|Q9JM76|ARPC3_MOUSE	-2.2453	-1.95783	0.0927179	1	0.0320502	0.0958234	0.0898538	9501323
AYLQQLR	sp|Q9JM76|ARPC3_MOUSE	-2.33817	-1.94918	0.143786	1	0.0944885	0.120594	0.129664	13329480
IGAFGYMEC[+57]SAK	sp|Q9QUI0|RHOA_MOUSE	-2.22068	-1.81104	0.155822	1	0.0668821	0.122381	0.136548	5049619
TTIFSPEGR	sp|Q9R1P0|PSA4_MOUSE	-1.7479	-1.1765	0.0869351	1	0.121257	0.0648721	0.190465	7270822
LNEDMAC[+57]SVAGITSDANVLTNELR	sp|Q9R1P0|PSA4_MOUSE	-2.00079	-0.599217	0.62993	1	0.330226	0.255371	0.467192	476400
VEIATLTR	sp|Q9R1P0|PSA4_MOUSE	-1.7997	-1.03536	0.0966799	1	0.154109	0.0203328	0.254779	7901534
NC[+57]VAIAADR	sp|Q9R1P1|PSB3_MOUSE	-1.70877	-0.938724	0.0885678	1	0.137661	0.0469797	0.256683	1943865
VAASNIVQMK	sp|Q9R1P3|PSB2_MOUSE	-2.13398	-1.8395	0.0836033	1	0.0158203	0.0761719	0.0981607	3416268
NLADC[+57]LR	sp|Q9R1P3|PSB2_MOUSE	-2.31003	-2.02069	0.0426406	1	0.0497175	0.0229446	0.0964453	5303683
FILNLPTFSVR	sp|Q9R1P3|PSB2_MOUSE	-1.75582	-0.98204	0.2058	1	-0.0698332	0.079134	0.257927	1486232
FVFDRPLPVSR	sp|Q9R1P4|PSA1_MOUSE	-2.32319	-1.89634	0.101801	1	0.0920681	0.0796884	0.142282	11535094
YPAGASAPHC[+57]EMSR	sp|Q9R233|TPSN_MOUSE	-2.08573	-1.79967	0.098385	1	0.0217929	0.061457	0.0953557	2966520
SLSPEQNC[+57]PR	sp|Q9R233|TPSN_MOUSE	-2.22263	-1.69892	0.134761	1	0.0920007	0.0766663	0.174568	2353817
GHLLLAATPGLAGR	sp|Q9R233|TPSN_MOUSE	-1.75051	-1.09255	0.137542	1	0.120622	0.102067	0.21932	2918520
MVPVSVQQSLAVFSQR	sp|Q9WU78|PDC6I_MOUSE	-1.28781	-1.01302	0.0399841	1	0.0190955	0.0397954	0.0915968	559662
DTIALLC[+57]KPEPELNAAIPSANPAK	sp|Q9WU78|PDC6I_MOUSE	-2.36579	-1.93132	0.096894	1	0.0900844	0.0480574	0.144823	3119125
IVTC[+57]GTDR	sp|Q9WV32|ARC1B_MOUSE	-2.19484	-1.60372	0.126442	1	0.142483	0.0761319	0.197041	6512492
ASSEGGAATGAGLDSLHK	sp|Q9WV32|ARC1B_MOUSE	-2.70701	-2.09954	0.126152	1	0.105704	0.133886	0.202491	5097554
EVNVSPC[+57]PTDPC[+57]QLHK	sp|Q9Z0J0|NPC2_MOUSE	-2.31283	-1.78243	0.20657	1	-0.0161825	0.1768	0.0614205	3846407
NYTDDAIETDDLTIK	sp|Q9Z2U0|PSA7_MOUSE	-2.99204	-2.2624	0.361621	1	0.0514096	0.243214	0.145639	6747630
GVNTFSPEGR	sp|Q9Z2U1|PSA5_MOUSE	-1.92282	-1.27483	0.119165	1	0.131622	0.0489613	0.215998	6615530
GPQLFHMDPSGTFVQC[+57]DAR	sp|Q9Z2U1|PSA5_MOUSE	-1.76362	-1.24772	0.182045	1	0.0716847	0.0984903	0.171965	2192525
EELEEVIKDI	sp|Q9Z2U1|PSA5_MOUSE	-1.73264	-1.14457	0.148339	1	0.104184	0.0857387	0.196023	1106569
GPAISIC[+57]K	sp|P01590|IL2RA_MOUSE	-0.396448	-0.00328303	0.124909	1	0.0926699	0.0658073	0.131055	595245
TGWTQPQLTC[+57]VDER	sp|P01590|IL2RA_MOUSE	-2.13506	-1.55487	0.10302	1	0.114757	0.0445146	0.193396	324520
FLASEESQGSR	sp|P01590|IL2RA_MOUSE	-1.88456	-1.4053	0.0495624	1	0.089926	0.0203642	0.159752	527545
YVLTLNK	sp|P01731|CD8A_MOUSE	-1.84748	-1.31908	0.119957	1	0.0823061	0.0719463	0.176132	1203339
GGSHTIQVISGC[+57]EVGSDGR	sp|P01901|HA1B_MOUSE	-1.9473	-1.49867	0.0864205	1	0.0653228	0.039452	0.149543	2735463
NIIGMDKPLSLPGFLAK	sp|P03958|ADA_MOUSE	-1.24867	-0.793575	0.350535	1	0.0264449	0.151698	0.132881	193784
TQQVIPMVK	sp|P04187|GRAB_MOUSE	-2.64311	-2.4135	0.0472541	1	0.00118496	0.0765361	0.0514611	64361560
NVNVKPGDVC[+57]YVAGWGR	sp|P04187|GRAB_MOUSE	-2.83932	-2.14437	0.284163	1	0.0428994	0.231652	0.148123	29482562
YSNTLQEVELTVQK	sp|P04187|GRAB_MOUSE	-2.48302	-1.26625	0.314283	1	0.203212	0.0638677	0.40559	7101523
EC[+57]ESYFK	sp|P04187|GRAB_MOUSE	-1.87624	-1.37129	0.415962	1	0.0554356	0.168317	0.0941019	8418558
VAAGIVSYGYK	sp|P04187|GRAB_MOUSE	-3.04205	-2.45375	0.240434	1	0.0199966	0.196099	0.113019	48733400
DETVDDFWR	sp|P06800|PTPRC_MOUSE	-1.92468	-0.778555	0.629689	1	0.219467	0.273331	0.382042	5114914
VDVYGYVVK	sp|P06800|PTPRC_MOUSE	-2.15533	-1.68721	0.154682	1	0.0811618	0.10672	0.15604	4975966
NSNVVPYDFNR	sp|P06800|PTPRC_MOUSE	-2.29179	-1.86725	0.102821	1	0.0830006	0.076459	0.141513	4133351
GEELPAEPK	sp|P06800|PTPRC_MOUSE	-2.13079	-1.6123	0.194545	1	0.0999757	0.120752	0.172832	8138147
SLGTDLMNEMR	sp|P09055|ITB1_MOUSE	-1.71883	-1.01802	0.14812	1	0.125848	0.106005	0.233605	602829
GVLYGESVDK	sp|P10300|CD8B_MOUSE	-1.88822	-1.37572	0.0866949	1	0.11101	0.0701575	0.170831	2155196
NIILESSDSR	sp|P10300|CD8B_MOUSE	-1.67101	-1.45862	0.0697156	1	0.0347142	0.0707968	0.0665845	2378064
MVFGTGTK	sp|P10300|CD8B_MOUSE	-1.28988	-0.801821	0.323729	1	0.10036	0.131527	0.162685	1464046
YAGVFHVEK	sp|P15379|CD44_MOUSE	-0.955005	-0.715026	0.189347	1	0.0565635	0.0695469	0.0799928	273370
YGFIEGNVVIPR	sp|P15379|CD44_MOUSE	-1.98802	-1.26016	0.132718	1	0.117664	0.0721048	0.242617	1142988
LVINGGNGTVEDR	sp|P15379|CD44_MOUSE	-1.41396	-0.895246	0.0801053	1	0.116493	0.0296086	0.172903	204771
SQEMVHLVNKEPSETPDQC[+57]MTADETR	sp|P15379|CD44_MOUSE	-1.75233	-0.892984	0.186723	1	0.20256	0.0808385	0.286447	301074
TC[+57]DFHPFDNLR	sp|P16297|IL2RB_MOUSE	-0.84331	-0.281367	0.263117	1	0.117678	0.123946	0.187314	213078
VSQVSHYIEPYLEFEAR	sp|P16297|IL2RB_MOUSE	-1.38503	-1.23957	0.0214961	1	0.0299496	0.0264208	0.0484881	1996803
AVQLLLLQK	sp|P16297|IL2RB_MOUSE	-1.64198	-0.938016	0.0928676	1	0.0731811	0.0636848	0.234654	549203
YLPALQGC[+57]R	sp|P24788|CD11B_MOUSE	-1.18067	-0.400632	0.114425	1	0.187532	0.0481683	0.260012	528591
SVEEFQC[+57]LNR	sp|P24788|CD11B_MOUSE	-1.41713	-0.877567	0.22627	1	0.129067	0.135205	0.179855	278754
IEEGTYGVVYR	sp|P24788|CD11B_MOUSE	-1.45656	-0.921261	0.39849	1	0.0616041	0.178433	0.0879039	342489
FLTYYPGR	sp|P24788|CD11B_MOUSE	-1.22934	-0.310737	0.268194	1	0.193307	0.101592	0.3062	688420
DLLMVPMQR	sp|P27870|VAV_MOUSE	-1.43326	-0.983999	0.326431	1	0.0884193	0.149755	0.116671	501197
SWALAQR	sp|P37217|CD69_MOUSE	-1.09154	-0.934922	0.0487312	1	0.0274732	0.0522064	0.0433447	480864
YSGELEHWIGLK	sp|P37217|CD69_MOUSE	-1.681	-0.871482	0.0925518	1	0.176315	0.0610978	0.269839	445696
LAGMADGLFLLR	sp|P43404|ZAP70_MOUSE	-1.55624	-0.46221	0.271374	1	0.200649	0.088004	0.364676	857152
LEGDALEQAIISQAPQVEK	sp|P43404|ZAP70_MOUSE	-1.60414	-1.22542	0.145467	1	0.0852742	0.117135	0.126239	1405574
KHPDASVNFSEFSK	sp|P63158|HMGB1_MOUSE	-1.8964	0	1.35482	1	-0.397957	0.0338176	0.681986	7150930
FKDPNAPK	sp|P63158|HMGB1_MOUSE	-2.26079	-1.99559	0.0517105	1	-0.025877	0.0609932	0.0883991	3702319
GEHPGLSIGDVAK	sp|P63158|HMGB1_MOUSE	-1.92011	-1.62163	0.0503758	1	0.0711527	0.0511035	0.0994933	4035178
LGEMWNNTAADDKQPYEK	sp|P63158|HMGB1_MOUSE	-2.85895	-2.22315	0.2202	1	0.0603773	0.211933	0.126577	7081296
VLPSITTEILK	sp|P67778|PHB_MOUSE	-1.91655	-1.45812	0.213665	1	0.0311091	0.152808	0.109934	3775705
FDAGELITQR	sp|P67778|PHB_MOUSE	-2.37587	-1.86385	0.125331	1	0.103497	0.0405938	0.170672	4742882
AAIISAEGDSK	sp|P67778|PHB_MOUSE	-2.04622	-1.44675	0.164755	1	0.129701	0.0816787	0.199823	2717368
AAELIANSLATAGDGLIELR	sp|P67778|PHB_MOUSE	-1.03079	-0.531955	0.291818	1	0.0497812	0.166278	0.0612557	943005
SNHSAQDAVDNLLLLSK	sp|Q03267|IKZF1_MOUSE	-1.14441	-0.415152	0.171192	1	0.146824	0.0861606	0.243087	449956
LQSTENDYINASLVDIEEAQR	sp|Q06180|PTN2_MOUSE	-1.87834	-1.02522	0.256766	1	0.191648	0.114519	0.284373	738377
TLWENLSMIR	sp|Q60611|SATB1_MOUSE	-1.85986	-1.50016	0.145024	1	-0.0158199	0.0975525	0.119899	731761
THTGEKPYAC[+57]SHC[+57]DK	sp|Q61164|CTCF_MOUSE	-1.04994	-0.750487	0.345291	1	-0.0672885	0.099817	0.0951603	12614
SMVDVLADHAGELVR	sp|Q64131|RUNX3_MOUSE	-1.81032	-1.22839	0.164321	1	0.106913	0.126127	0.193977	997501
MNNVNVVYTPWSNLK	sp|Q78PG9|CCD25_MOUSE	-1.4447	-0.917266	0.170299	1	0.0964128	0.0928931	0.175812	135066
TADMDVGQIGFHR	sp|Q78PG9|CCD25_MOUSE	-1.27837	-0.548046	0.253099	1	0.134884	0.0977017	0.243442	289381
VFFYNPTTR	sp|Q8CGF7|TCRG1_MOUSE	-1.6489	-0.741165	0.140767	1	0.154293	0.0455916	0.302578	1551470
LSMWDRPDDLIGR	sp|Q8CGF7|TCRG1_MOUSE	-1.65142	-1.29515	0.207057	1	0.0376138	0.118756	0.0822731	773480
EALFNEFVAAAR	sp|Q8CGF7|TCRG1_MOUSE	-1.48992	-1.15549	0.137506	1	0.0387495	0.111478	0.0945875	294412
ALLSDMVR	sp|Q8CGF7|TCRG1_MOUSE	-1.29231	-1.13942	0.0629534	1	0.0160182	0.0509628	0.024843	980503
YLVLDC[+57]VPEER	sp|Q8CGF7|TCRG1_MOUSE	-1.72208	-1.51763	0.0560527	1	-0.0521842	0.0675456	0.0681483	725115

## Sheet: S4_PantherAnnotation
GeneID	MappedID	GeneName	PantherSubFamily	PantherGO-SlimMF	PantherGO-SlimBP	PantherGO-SlimCC	PantherProteinClass	Pathway	Go-MF	Go-BP	Go-CC	Reactome	Enhancer	Start	End	ChromosomeLocation	Species
MOUSE|MGI=MGI=1342057|UniProtKB=Q09200	Q09200	Beta-1,4 N-acetylgalactosaminyltransferase 1;B4galnt1;PTN000791069;orthologs	BETA-1,4 N-ACETYLGALACTOSAMINYLTRANSFERASE 1 (PTHR15046:SF1)	UDP-glycosyltransferase activity(GO:0008194);hexosyltransferase activity(GO:0016758)	ceramide biosynthetic process(GO:0046513);glycosphingolipid biosynthetic process(GO:0006688)				(N-acetylneuraminyl)-galactosylglucosylceramide N-acetylgalactosaminyltransferase activity(GO:0003947);acetylgalactosaminyltransferase activity(GO:0008376);transferase activity(GO:0016740);glycosyltransferase activity(GO:0016757);hexosyltransferase activity(GO:0016758)	ganglioside biosynthetic process(GO:0001574);lipid metabolic process(GO:0006629);sphingolipid metabolic process(GO:0006665);glycosphingolipid metabolic process(GO:0006687);glycosphingolipid biosynthetic process(GO:0006688);vacuole organization(GO:0007033);spermatogenesis(GO:0007283);determination of adult lifespan(GO:0008340);lipid storage(GO:0019915);nerve development(GO:0021675);lipid glycosyla…	Golgi membrane(GO:0000139);Golgi apparatus(GO:0005794);membrane(GO:0016020)	Metabolism of lipids;Metabolism;Glycosphingolipid metabolism;Sphingolipid metabolism					Mus musculus
MOUSE|MGI=MGI=2384812|UniProtKB=Q3TFD2	Q3TFD2	Lysophosphatidylcholine acyltransferase 1;Lpcat1;PTN000551927;orthologs	LYSOPHOSPHATIDYLCHOLINE ACYLTRANSFERASE 1 (PTHR23063:SF57)	O-acyltransferase activity(GO:0008374)		endoplasmic reticulum(GO:0005783)	acyltransferase(PC00042)		1-acylglycerol-3-phosphate O-acyltransferase activity(GO:0003841);calcium ion binding(GO:0005509);O-acyltransferase activity(GO:0008374);transferase activity(GO:0016740);acyltransferase activity(GO:0016746);lysophosphatidic acid acyltransferase activity(GO:0042171);metal ion binding(GO:0046872);1-alkenylglycerophosphocholine O-acyltransferase activity(GO:0047159);1-acylglycerophosphocholine O-acy…	lipid metabolic process(GO:0006629);phosphatidylcholine biosynthetic process(GO:0006656);phospholipid biosynthetic process(GO:0008654);protein catabolic process(GO:0030163);phosphatidylcholine acyl-chain remodeling(GO:0036151);surfactant homeostasis(GO:0043129);positive regulation of protein catabolic process(GO:0045732);retina development in camera-type eye(GO:0060041);negative regulation of pho…	endoplasmic reticulum(GO:0005783);Golgi apparatus(GO:0005794);lipid droplet(GO:0005811);plasma membrane(GO:0005886);membrane(GO:0016020)	Synthesis of PC;Glycerophospholipid biosynthesis;Acyl chain remodelling of PG;Phospholipid metabolism;Neutrophil degranulation;Metabolism of lipids;Immune System;Acyl chain remodelling of PC;Innate Immune System;Metabolism;Synthesis of PA					Mus musculus
MOUSE|MGI=MGI=1336186|UniProtKB=Q9D517	Q9D517	1-acyl-sn-glycerol-3-phosphate acyltransferase gamma;Agpat3;PTN000105185;orthologs	1-ACYL-SN-GLYCEROL-3-PHOSPHATE ACYLTRANSFERASE GAMMA (PTHR10983:SF9)	O-acyltransferase activity(GO:0008374)		endoplasmic reticulum(GO:0005783)	acyltransferase(PC00042)		1-acylglycerol-3-phosphate O-acyltransferase activity(GO:0003841);transferase activity(GO:0016740);acyltransferase activity(GO:0016746);lysophosphatidic acid acyltransferase activity(GO:0042171)	lipid metabolic process(GO:0006629);phospholipid biosynthetic process(GO:0008654)	nucleus(GO:0005634);nuclear envelope(GO:0005635);endoplasmic reticulum(GO:0005783);endoplasmic reticulum membrane(GO:0005789);endomembrane system(GO:0012505);membrane(GO:0016020)	Glycerophospholipid biosynthesis;Membrane Trafficking;Phospholipid metabolism;Vesicle-mediated transport;Metabolism of lipids;Golgi-to-ER retrograde transport;Metabolism;Intra-Golgi and retrograde Golgi-to-ER traffic;COPI-independent Golgi-to-ER retrograde traffic;Synthesis of PA					Mus musculus
MOUSE|MGI=MGI=108414|UniProtKB=Q61205	Q61205	Platelet-activating factor acetylhydrolase IB subunit alpha1;Pafah1b3;PTN000220747;orthologs	PLATELET-ACTIVATING FACTOR ACETYLHYDROLASE IB SUBUNIT ALPHA1 (PTHR11852:SF2)	acetyltransferase activity(GO:0016407)		cytoplasm(GO:0005737)	protein modifying enzyme(PC00260)		1-alkyl-2-acetylglycerophosphocholine esterase activity(GO:0003847);protein binding(GO:0005515);hydrolase activity(GO:0016787);identical protein binding(GO:0042802);protein homodimerization activity(GO:0042803);protein-containing complex binding(GO:0044877);protein heterodimerization activity(GO:0046982);platelet-activating factor acetyltransferase activity(GO:0047179)	lipid metabolic process(GO:0006629);spermatogenesis(GO:0007283);lipid catabolic process(GO:0016042)	cytoplasm(GO:0005737);1-alkyl-2-acetylglycerophosphocholine esterase complex(GO:0008247)	Golgi-to-ER retrograde transport;Membrane Trafficking;Intra-Golgi and retrograde Golgi-to-ER traffic;COPI-independent Golgi-to-ER retrograde traffic;Vesicle-mediated transport					Mus musculus
MOUSE|MGI=MGI=108415|UniProtKB=Q61206	Q61206	Platelet-activating factor acetylhydrolase IB subunit alpha2;Pafah1b2;PTN000220791;orthologs	PLATELET-ACTIVATING FACTOR ACETYLHYDROLASE IB SUBUNIT ALPHA2 (PTHR11852:SF1)	acetyltransferase activity(GO:0016407)		cytoplasm(GO:0005737)	protein modifying enzyme(PC00260)		1-alkyl-2-acetylglycerophosphocholine esterase activity(GO:0003847);protein binding(GO:0005515);hydrolase activity(GO:0016787);identical protein binding(GO:0042802);protein-containing complex binding(GO:0044877);platelet-activating factor acetyltransferase activity(GO:0047179)	lipid metabolic process(GO:0006629);spermatogenesis(GO:0007283);lipid catabolic process(GO:0016042);positive regulation of macroautophagy(GO:0016239)	fibrillar center(GO:0001650);nucleolus(GO:0005730);cytoplasm(GO:0005737);cytosol(GO:0005829);plasma membrane(GO:0005886);1-alkyl-2-acetylglycerophosphocholine esterase complex(GO:0008247)	Golgi-to-ER retrograde transport;Membrane Trafficking;Immune System;Intra-Golgi and retrograde Golgi-to-ER traffic;Innate Immune System;Neutrophil degranulation;COPI-independent Golgi-to-ER retrograde traffic;Vesicle-mediated transport					Mus musculus
MOUSE|MGI=MGI=2145181|UniProtKB=Q80U44	Q80U44	Zinc finger FYVE domain-containing protein 16;Zfyve16;PTN000519210;orthologs	ZINC FINGER FYVE DOMAIN-CONTAINING PROTEIN 16 (PTHR46319:SF1)		endosomal transport(GO:0016197)	early endosome membrane(GO:0031901)		TGF-beta signaling pathway->Smad anchor for receptor activation;;	1-phosphatidylinositol binding(GO:0005545);phosphatidylinositol-3,4,5-trisphosphate binding(GO:0005547);metal ion binding(GO:0046872)	protein targeting to lysosome(GO:0006622);endosomal transport(GO:0016197)	cytoplasm(GO:0005737);endosome(GO:0005768);early endosome(GO:0005769);cytosol(GO:0005829);membrane(GO:0016020);early endosome membrane(GO:0031901);intracellular membrane-bounded organelle(GO:0043231)	Signaling by BMP;Signaling by TGFB family members;Signal Transduction					Mus musculus
MOUSE|MGI=MGI=2443588|UniProtKB=Q5SW28	Q5SW28	Phosphoinositide 3-kinase regulatory subunit 5;Pik3r5;PTN000400679;orthologs	PHOSPHOINOSITIDE 3-KINASE REGULATORY SUBUNIT 5 (PTHR15593:SF2)	kinase regulator activity(GO:0019207)	regulation of MAP kinase activity(GO:0043405);G protein-coupled receptor signaling pathway(GO:0007186);positive regulation of MAPK cascade(GO:0043410);positive regulation of protein serine/threonine kinase activity(GO:0071902)	phosphatidylinositol 3-kinase complex(GO:0005942)	kinase modulator(PC00140)	Insulin/IGF pathway-protein kinase B signaling cascade->Phosphatidylinositol 3-kinase;;EGF receptor signaling pathway->Phosphatidylinositol 3-kinase;;Axon guidance mediated by netrin->Phosphatidylinositol 3-kinase;;Endothelin signaling pathway->Phosphatidylinositol 3-kinase;;PDGF signaling pathway->Phosphatidylinositol 3-kinase;;p53 pathway feedback loops 2->Phosphatidylinositol 3-kinase;;PI3 kin…	1-phosphatidylinositol-3-kinase regulator activity(GO:0046935)	G protein-coupled receptor signaling pathway(GO:0007186);positive regulation of MAP kinase activity(GO:0043406);phosphatidylinositol metabolic process(GO:0046488)	nucleus(GO:0005634);cytoplasm(GO:0005737);cytosol(GO:0005829);plasma membrane(GO:0005886);phosphatidylinositol 3-kinase complex(GO:0005942);phosphatidylinositol 3-kinase complex, class IA(GO:0005943);phosphatidylinositol 3-kinase complex, class IB(GO:0005944);membrane(GO:0016020);centriolar satellite(GO:0034451)	Synthesis of PIPs at the plasma membrane;G beta:gamma signalling through PI3Kgamma;Phospholipid metabolism;Metabolism of lipids;PI Metabolism;Hemostasis;Signaling by GPCR;Erythropoietin activates Phosphoinositide-3-kinase (PI3K);Signaling by Erythropoietin;GPVI-mediated activation cascade;Metabolism;GPCR downstream signalling;G-protein beta:gamma signalling;Signal Transduction;Platelet activation…					Mus musculus
MOUSE|MGI=MGI=2443883|UniProtKB=Q8CHT0	Q8CHT0	Delta-1-pyrroline-5-carboxylate dehydrogenase, mitochondrial;Aldh4a1;PTN000193042;orthologs	DELTA-1-PYRROLINE-5-CARBOXYLATE DEHYDROGENASE, MITOCHONDRIAL (PTHR14516:SF3)	oxidoreductase activity(GO:0016491)			dehydrogenase(PC00092)	5-Hydroxytryptamine degredation->Aldehyde Dehydrogenase;;	1-pyrroline-5-carboxylate dehydrogenase activity(GO:0003842);aldehyde dehydrogenase (NAD+) activity(GO:0004029);oxidoreductase activity(GO:0016491);oxidoreductase activity, acting on the aldehyde or oxo group of donors, NAD or NADP as acceptor(GO:0016620);identical protein binding(GO:0042802);glyceraldehyde-3-phosphate dehydrogenase (NAD+) (non-phosphorylating) activity(GO:0043878)	proline metabolic process(GO:0006560);proline catabolic process to glutamate(GO:0010133)	mitochondrion(GO:0005739);cytosol(GO:0005829)	Metabolism;Metabolism of amino acids and derivatives;Proline catabolism;Glyoxylate metabolism and glycine degradation					Mus musculus
MOUSE|MGI=MGI=1922937|UniProtKB=Q68FE6	Q68FE6	Rho family-interacting cell polarization regulator 1;Ripor1;PTN000406345;orthologs	RHO FAMILY-INTERACTING CELL POLARIZATION REGULATOR 1 (PTHR15829:SF1)				non-receptor serine/threonine protein kinase(PC00167)		14-3-3 protein binding(GO:0071889)	Rho protein signal transduction(GO:0007266);cellular response to starvation(GO:0009267);response to wounding(GO:0009611);positive regulation of cell migration(GO:0030335);protein localization to Golgi apparatus(GO:0034067);negative regulation of Rho protein signal transduction(GO:0035024);establishment of Golgi localization(GO:0051683);positive regulation of intracellular protein transport(GO:009…	cytoplasm(GO:0005737);Golgi apparatus(GO:0005794);membrane(GO:0016020);cell leading edge(GO:0031252)						Mus musculus
MOUSE|MGI=MGI=1914135|UniProtKB=Q9DBL1	Q9DBL1	Short_branched chain specific acyl-CoA dehydrogenase, mitochondrial;Acadsb;PTN000097604;orthologs	SHORT_BRANCHED CHAIN SPECIFIC ACYL-COA DEHYDROGENASE, MITOCHONDRIAL (PTHR43884:SF1)	oxidoreductase activity, acting on the CH-CH group of donors(GO:0016627)		mitochondrion(GO:0005739)	dehydrogenase(PC00092)		2-methylbutanoyl-CoA dehydrogenase activity(GO:0003853);acyl-CoA dehydrogenase activity(GO:0003995);electron transfer activity(GO:0009055);oxidoreductase activity(GO:0016491);oxidoreductase activity, acting on the CH-CH group of donors(GO:0016627);short-chain fatty acyl-CoA dehydrogenase activity(GO:0016937);identical protein binding(GO:0042802);flavin adenine dinucleotide binding(GO:0050660);2-m…	isoleucine catabolic process(GO:0006550);lipid metabolic process(GO:0006629);fatty acid metabolic process(GO:0006631);acyl-CoA metabolic process(GO:0006637)	mitochondrion(GO:0005739)	Branched-chain amino acid catabolism;Metabolism;Metabolism of amino acids and derivatives					Mus musculus
MOUSE|MGI=MGI=1914710|UniProtKB=Q9CQ62	Q9CQ62	2,4-dienoyl-CoA reductase [(3E)-enoyl-CoA-producing], mitochondrial;Decr1;PTN000671619;orthologs	2,4-DIENOYL-COA REDUCTASE [(3E)-ENOYL-COA-PRODUCING], MITOCHONDRIAL (PTHR43658:SF14)	oxidoreductase activity, acting on the CH-CH group of donors, NAD or NADP as acceptor(GO:0016628)	fatty acid beta-oxidation(GO:0006635)	mitochondrion(GO:0005739)	oxidoreductase(PC00176)		2,4-dienoyl-CoA reductase (NADPH) activity(GO:0008670);oxidoreductase activity(GO:0016491);identical protein binding(GO:0042802);NADPH binding(GO:0070402)	lipid metabolic process(GO:0006629);fatty acid metabolic process(GO:0006631);fatty acid beta-oxidation(GO:0006635);positive regulation of cold-induced thermogenesis(GO:0120162)	nucleoplasm(GO:0005654);mitochondrion(GO:0005739);cytosol(GO:0005829);catalytic complex(GO:1902494)	Mitochondrial Fatty Acid Beta-Oxidation;mitochondrial fatty acid beta-oxidation of unsaturated fatty acids;Fatty acid metabolism;Metabolism of lipids;Metabolism					Mus musculus
MOUSE|MGI=MGI=1353452|UniProtKB=P47740	P47740	Aldehyde dehydrogenase family 3 member A2;Aldh3a2;PTN000193163;orthologs	ALDEHYDE DEHYDROGENASE FAMILY 3 MEMBER A2 (PTHR43570:SF9)	oxidoreductase activity(GO:0016491)	cellular metabolic process(GO:0044237);organic substance metabolic process(GO:0071704)	cytoplasm(GO:0005737)	dehydrogenase(PC00092)	5-Hydroxytryptamine degredation->Aldehyde Dehydrogenase;;	3-chloroallyl aldehyde dehydrogenase activity(GO:0004028);aldehyde dehydrogenase (NAD+) activity(GO:0004029);oxidoreductase activity(GO:0016491);oxidoreductase activity, acting on the aldehyde or oxo group of donors, NAD or NADP as acceptor(GO:0016620);protein homodimerization activity(GO:0042803);glyceraldehyde-3-phosphate dehydrogenase (NAD+) (non-phosphorylating) activity(GO:0043878);long-chai…	response to reactive oxygen species(GO:0000302);cellular aldehyde metabolic process(GO:0006081);lipid metabolic process(GO:0006629);fatty acid metabolic process(GO:0006631);sesquiterpenoid metabolic process(GO:0006714);central nervous system development(GO:0007417);peripheral nervous system development(GO:0007422);epidermis development(GO:0008544);phytol metabolic process(GO:0033306);formaldehyde…	cytoplasm(GO:0005737);mitochondrion(GO:0005739);mitochondrial inner membrane(GO:0005743);peroxisome(GO:0005777);endoplasmic reticulum(GO:0005783);endoplasmic reticulum membrane(GO:0005789);membrane(GO:0016020);intracellular membrane-bounded organelle(GO:0043231)	Signaling by Rho GTPases;Protein localization;RND1 GTPase cycle;RND2 GTPase cycle;Fatty acid metabolism;Metabolism of lipids;Sphingolipid metabolism;Insertion of tail-anchored proteins into the endoplasmic reticulum membrane;RHO GTPase cycle;Metabolism;Peroxisomal lipid metabolism;Sphingolipid de novo biosynthesis;Alpha-oxidation of phytanate;Signal Transduction;Signaling by Rho GTPases, Miro GTP…					Mus musculus
MOUSE|MGI=MGI=105089|UniProtKB=P51660	P51660	Peroxisomal multifunctional enzyme type 2;Hsd17b4;PTN000671962;orthologs	PEROXISOMAL MULTIFUNCTIONAL ENZYME TYPE 2 (PTHR13078:SF56)	hydro-lyase activity(GO:0016836);oxidoreductase activity, acting on the CH-OH group of donors, NAD or NADP as acceptor(GO:0016616)	fatty acid beta-oxidation(GO:0006635)				3-hydroxyacyl-CoA dehydrogenase activity(GO:0003857);enoyl-CoA hydratase activity(GO:0004300);estradiol 17-beta-dehydrogenase [NAD(P)] activity(GO:0004303);protein binding(GO:0005515);oxidoreductase activity(GO:0016491);lyase activity(GO:0016829);isomerase activity(GO:0016853);3-hydroxyacyl-CoA dehydratase activity(GO:0018812);3alpha,7alpha,12alpha-trihydroxy-5beta-cholest-24-enoyl-CoA hydratase …	very long-chain fatty acid metabolic process(GO:0000038);lipid metabolic process(GO:0006629);fatty acid metabolic process(GO:0006631);fatty acid beta-oxidation(GO:0006635);androgen metabolic process(GO:0008209);estrogen metabolic process(GO:0008210);very long-chain fatty-acyl-CoA metabolic process(GO:0036111);medium-chain fatty-acyl-CoA metabolic process(GO:0036112);Sertoli cell development(GO:00…	mitochondrion(GO:0005739);peroxisome(GO:0005777);peroxisomal matrix(GO:0005782)	alpha-linolenic acid (ALA) metabolism;Protein localization;alpha-linolenic (omega3) and linoleic (omega6) acid metabolism;Beta-oxidation of very long chain fatty acids;Synthesis of bile acids and bile salts via 7alpha-hydroxycholesterol;Synthesis of bile acids and bile salts;Bile acid and bile salt metabolism;Fatty acid metabolism;Metabolism of steroids;Metabolism of lipids;Metabolism;Peroxisomal…					Mus musculus
MOUSE|MGI=MGI=96009|UniProtKB=Q61425	Q61425	Hydroxyacyl-coenzyme A dehydrogenase, mitochondrial;Hadh;PTN000592916;orthologs	HYDROXYACYL-COENZYME A DEHYDROGENASE, MITOCHONDRIAL (PTHR43561:SF3)	oxidoreductase activity, acting on the CH-OH group of donors, NAD or NADP as acceptor(GO:0016616)	fatty acid beta-oxidation(GO:0006635)				3-hydroxyacyl-CoA dehydrogenase activity(GO:0003857);protein binding(GO:0005515);oxidoreductase activity(GO:0016491);oxidoreductase activity, acting on the CH-OH group of donors, NAD or NADP as acceptor(GO:0016616);identical protein binding(GO:0042802);NAD+ binding(GO:0070403)	lipid metabolic process(GO:0006629);fatty acid metabolic process(GO:0006631);fatty acid beta-oxidation(GO:0006635);response to xenobiotic stimulus(GO:0009410);response to activity(GO:0014823);negative regulation of insulin secretion(GO:0046676);regulation of insulin secretion(GO:0050796);positive regulation of cold-induced thermogenesis(GO:0120162)	nucleoplasm(GO:0005654);cytoplasm(GO:0005737);mitochondrion(GO:0005739);mitochondrial inner membrane(GO:0005743)	Mitochondrial Fatty Acid Beta-Oxidation;Beta oxidation of lauroyl-CoA to decanoyl-CoA-CoA;mitochondrial fatty acid beta-oxidation of saturated fatty acids;Fatty acid metabolism;Metabolism of lipids;Beta oxidation of butanoyl-CoA to acetyl-CoA;Beta oxidation of octanoyl-CoA to hexanoyl-CoA;Beta oxidation of hexanoyl-CoA to butanoyl-CoA;Metabolism;Beta oxidation of decanoyl-CoA to octanoyl-CoA-CoA					Mus musculus
MOUSE|MGI=MGI=1889802|UniProtKB=Q99L13	Q99L13	3-hydroxyisobutyrate dehydrogenase, mitochondrial;Hibadh;PTN000541342;orthologs	3-HYDROXYISOBUTYRATE DEHYDROGENASE, MITOCHONDRIAL (PTHR22981:SF7)	oxidoreductase activity, acting on the CH-OH group of donors, NAD or NADP as acceptor(GO:0016616)			dehydrogenase(PC00092)		3-hydroxyisobutyrate dehydrogenase activity(GO:0008442);oxidoreductase activity(GO:0016491);NADP binding(GO:0050661);NAD binding(GO:0051287)	valine catabolic process(GO:0006574);branched-chain amino acid catabolic process(GO:0009083)	mitochondrion(GO:0005739)	Branched-chain amino acid catabolism;Metabolism;Metabolism of amino acids and derivatives					Mus musculus
MOUSE|MGI=MGI=1923792|UniProtKB=Q8QZS1	Q8QZS1	3-hydroxyisobutyryl-CoA hydrolase, mitochondrial;Hibch;PTN000234658;orthologs	3-HYDROXYISOBUTYRYL-COA HYDROLASE, MITOCHONDRIAL (PTHR43176:SF3)	thiolester hydrolase activity(GO:0016790)	alpha-amino acid metabolic process(GO:1901605);amino acid catabolic process(GO:0009063);branched-chain amino acid metabolic process(GO:0009081)		hydrolase(PC00121)		3-hydroxyisobutyryl-CoA hydrolase activity(GO:0003860);hydrolase activity(GO:0016787)	valine catabolic process(GO:0006574);branched-chain amino acid catabolic process(GO:0009083)	mitochondrion(GO:0005739)	Branched-chain amino acid catabolism;Metabolism;Metabolism of amino acids and derivatives					Mus musculus
MOUSE|MGI=MGI=1309992|UniProtKB=Q8K354	Q8K354	Carbonyl reductase [NADPH] 3;Cbr3;PTN000673343;orthologs	CARBONYL REDUCTASE [NADPH] 3 (PTHR43963:SF3)	oxidoreductase activity, acting on the CH-OH group of donors, NAD or NADP as acceptor(GO:0016616)			reductase(PC00198)		3-keto sterol reductase activity(GO:0000253);carbonyl reductase (NADPH) activity(GO:0004090);NADPH dehydrogenase (quinone) activity(GO:0008753);oxidoreductase activity(GO:0016491);oxidoreductase activity, acting on the CH-OH group of donors, NAD or NADP as acceptor(GO:0016616);NADPH binding(GO:0070402)	phylloquinone catabolic process(GO:0042376);cognition(GO:0050890)	nucleoplasm(GO:0005654);cytoplasm(GO:0005737);cytosol(GO:0005829)	Phase I - Functionalization of compounds;Metabolism;Biological oxidations					Mus musculus
MOUSE|MGI=MGI=1330808|UniProtKB=O88736	O88736	3-keto-steroid reductase_17-beta-hydroxysteroid dehydrogenase 7;Hsd17b7;PTN000672702;orthologs	3-KETO-STEROID REDUCTASE_17-BETA-HYDROXYSTEROID DEHYDROGENASE 7 (PTHR44442:SF1)	oxidoreductase activity, acting on the CH-OH group of donors, NAD or NADP as acceptor(GO:0016616)	sterol metabolic process(GO:0016125)	endoplasmic reticulum membrane(GO:0005789)	reductase(PC00198)	Androgen/estrogene/progesterone biosynthesis->Estradiol 17beta-dehydrogenase;;	3-keto sterol reductase activity(GO:0000253);estradiol 17-beta-dehydrogenase [NAD(P)] activity(GO:0004303);prolactin receptor binding(GO:0005148);oxidoreductase activity(GO:0016491);5alpha-androstane-3beta,17beta-diol dehydrogenase activity(GO:0047024)	lipid metabolic process(GO:0006629);steroid biosynthetic process(GO:0006694);cholesterol biosynthetic process(GO:0006695);estrogen biosynthetic process(GO:0006703);nervous system development(GO:0007399);brain development(GO:0007420);androgen metabolic process(GO:0008209);cell differentiation(GO:0030154);embryonic organ development(GO:0048568);embryonic skeletal system development(GO:0048706)	endoplasmic reticulum(GO:0005783);endoplasmic reticulum membrane(GO:0005789);membrane(GO:0016020)	Metabolism of steroids;Cholesterol biosynthesis;Metabolism of lipids;Metabolism					Mus musculus
MOUSE|MGI=MGI=90169|UniProtKB=Q99LB2	Q99LB2	Dehydrogenase_reductase SDR family member 4;Dhrs4;PTN000673567;orthologs	DEHYDROGENASE_REDUCTASE SDR FAMILY MEMBER 4-RELATED (PTHR43943:SF8)	oxidoreductase activity, acting on the CH-OH group of donors, NAD or NADP as acceptor(GO:0016616)			dehydrogenase(PC00092)		3-keto sterol reductase activity(GO:0000253);retinal dehydrogenase activity(GO:0001758);carbonyl reductase (NADPH) activity(GO:0004090);oxidoreductase activity(GO:0016491);oxidoreductase activity, acting on NAD(P)H, quinone or similar compound as acceptor(GO:0016655);alcohol dehydrogenase [NAD(P)+] activity(GO:0018455);identical protein binding(GO:0042802);NADP-retinol dehydrogenase activity(GO:0…	retinal metabolic process(GO:0042574)	nucleus(GO:0005634);mitochondrion(GO:0005739);peroxisome(GO:0005777);peroxisomal membrane(GO:0005778)	Protein localization;Signaling by Nuclear Receptors;Peroxisomal protein import;RA biosynthesis pathway;Signaling by Retinoic Acid;Signal Transduction					Mus musculus
MOUSE|MGI=MGI=1918397|UniProtKB=Q9D404	Q9D404	3-oxoacyl-[acyl-carrier-protein] synthase, mitochondrial;Oxsm;PTN000196432;orthologs	3-OXOACYL-[ACYL-CARRIER-PROTEIN] SYNTHASE, MITOCHONDRIAL (PTHR11712:SF336)	acyltransferase activity, transferring groups other than amino-acyl groups(GO:0016747)	fatty acid biosynthetic process(GO:0006633)				3-oxoacyl-[acyl-carrier-protein] synthase activity(GO:0004315);transferase activity(GO:0016740);acyltransferase activity(GO:0016746);acyltransferase activity, transferring groups other than amino-acyl groups(GO:0016747)	lipid metabolic process(GO:0006629);fatty acid metabolic process(GO:0006631);fatty acid biosynthetic process(GO:0006633);acyl-CoA metabolic process(GO:0006637);short-chain fatty acid biosynthetic process(GO:0051790);medium-chain fatty acid biosynthetic process(GO:0051792)	mitochondrion(GO:0005739);cytosol(GO:0005829)						Mus musculus
MOUSE|MGI=MGI=1354721|UniProtKB=Q9QXX4	Q9QXX4	Calcium-binding mitochondrial carrier protein Aralar2;Slc25a13;PTN000640418;orthologs	CALCIUM-BINDING MITOCHONDRIAL CARRIER PROTEIN ARALAR2 (PTHR45678:SF12)	L-glutamate transmembrane transporter activity(GO:0005313)	C4-dicarboxylate transport(GO:0015740);mitochondrial transmembrane transport(GO:1990542);L-alpha-amino acid transmembrane transport(GO:1902475);respiratory electron transport chain(GO:0022904);acidic amino acid transport(GO:0015800);amide transport(GO:0042886)		secondary carrier transporter(PC00258)		3-sulfino-L-alanine: proton, glutamate antiporter activity(GO:0000514);aspartate:glutamate, proton antiporter activity(GO:0000515);L-glutamate transmembrane transporter activity(GO:0005313);calcium ion binding(GO:0005509);acidic amino acid transmembrane transporter activity(GO:0015172);L-aspartate transmembrane transporter activity(GO:0015183);identical protein binding(GO:0042802);metal ion bindi…	gluconeogenesis(GO:0006094);ATP biosynthetic process(GO:0006754);aspartate transmembrane transport(GO:0015810);L-glutamate transmembrane transport(GO:0015813);malate-aspartate shuttle(GO:0043490);cellular respiration(GO:0045333);response to calcium ion(GO:0051592);transmembrane transport(GO:0055085)	mitochondrion(GO:0005739);mitochondrial inner membrane(GO:0005743);membrane(GO:0016020)	Gluconeogenesis;Metabolism of carbohydrates;Metabolism;Metabolism of amino acids and derivatives;Glucose metabolism;Aspartate and asparagine metabolism					Mus musculus
MOUSE|MGI=MGI=1926080|UniProtKB=Q8BH59	Q8BH59	Calcium-binding mitochondrial carrier protein Aralar1;Slc25a12;PTN000640398;orthologs	CALCIUM-BINDING MITOCHONDRIAL CARRIER PROTEIN ARALAR1 (PTHR45678:SF7)	L-glutamate transmembrane transporter activity(GO:0005313)	C4-dicarboxylate transport(GO:0015740);mitochondrial transmembrane transport(GO:1990542);L-alpha-amino acid transmembrane transport(GO:1902475);respiratory electron transport chain(GO:0022904);acidic amino acid transport(GO:0015800);amide transport(GO:0042886)		secondary carrier transporter(PC00258)		3-sulfino-L-alanine: proton, glutamate antiporter activity(GO:0000514);aspartate:glutamate, proton antiporter activity(GO:0000515);L-glutamate transmembrane transporter activity(GO:0005313);calcium ion binding(GO:0005509);acidic amino acid transmembrane transporter activity(GO:0015172);L-aspartate transmembrane transporter activity(GO:0015183);identical protein binding(GO:0042802);metal ion bindi…	glutamate biosynthetic process(GO:0006537);positive regulation of glucose metabolic process(GO:0010907);aspartate transmembrane transport(GO:0015810);L-glutamate transmembrane transport(GO:0015813);positive regulation of myelination(GO:0031643);malate-aspartate shuttle(GO:0043490);response to calcium ion(GO:0051592);transmembrane transport(GO:0055085);negative regulation of glucose catabolic proc…	mitochondrion(GO:0005739);mitochondrial inner membrane(GO:0005743);membrane(GO:0016020);myelin sheath(GO:0043209)	Gluconeogenesis;Metabolism of carbohydrates;Metabolism;Metabolism of amino acids and derivatives;Glucose metabolism;Aspartate and asparagine metabolism					Mus musculus
MOUSE|MGI=MGI=2443226|UniProtKB=Q3TIU4	Q3TIU4	2',5'-phosphodiesterase 12;Pde12;PTN000251906;orthologs	2',5'-PHOSPHODIESTERASE 12 (PTHR12121:SF37)	3'-5'-RNA exonuclease activity(GO:0000175)	nuclear-transcribed mRNA catabolic process, deadenylation-dependent decay(GO:0000288)	mitochondrion(GO:0005739)	mRNA polyadenylation factor(PC00146)		3'-5'-RNA exonuclease activity(GO:0000175);catalytic activity(GO:0003824);nuclease activity(GO:0004518);exonuclease activity(GO:0004527);poly(A)-specific ribonuclease activity(GO:0004535);hydrolase activity(GO:0016787);metal ion binding(GO:0046872)	nuclear-transcribed mRNA catabolic process, deadenylation-dependent decay(GO:0000288);mitochondrial mRNA catabolic process(GO:0000958);mRNA processing(GO:0006397);cellular response to interferon-alpha(GO:0035457);regulation of mitochondrial mRNA stability(GO:0044528);positive regulation of viral genome replication(GO:0045070);cellular response to type II interferon(GO:0071346);cellular response t…	mitochondrion(GO:0005739);mitochondrial matrix(GO:0005759)	Interferon Signaling;Immune System;OAS antiviral response;Cytokine Signaling in Immune system;Antiviral mechanism by IFN-stimulated genes					Mus musculus
MOUSE|MGI=MGI=1888981|UniProtKB=Q9D8S4	Q9D8S4	Oligoribonuclease, mitochondrial;Rexo2;PTN000114106;orthologs	OLIGORIBONUCLEASE, MITOCHONDRIAL (PTHR11046:SF0)				endoribonuclease(PC00094)		3'-5'-RNA exonuclease activity(GO:0000175);magnesium ion binding(GO:0000287);nucleic acid binding(GO:0003676);nuclease activity(GO:0004518);exonuclease activity(GO:0004527);3'-5'-DNA exonuclease activity(GO:0008296);3'-5' exonuclease activity(GO:0008408);hydrolase activity(GO:0016787);metal ion binding(GO:0046872)	nucleobase-containing compound metabolic process(GO:0006139)	nucleus(GO:0005634);nucleolus(GO:0005730);cytoplasm(GO:0005737);mitochondrion(GO:0005739);mitochondrial intermembrane space(GO:0005758);mitochondrial matrix(GO:0005759);focal adhesion(GO:0005925)						Mus musculus
MOUSE|MGI=MGI=2442555|UniProtKB=Q8CI75	Q8CI75	DIS3-like exonuclease 2;Dis3l2;PTN000599294;orthologs	DIS3-LIKE EXONUCLEASE 2 (PTHR23355:SF9)	3'-5'-RNA exonuclease activity(GO:0000175)			exoribonuclease(PC00099)		3'-5'-RNA exonuclease activity(GO:0000175);magnesium ion binding(GO:0000287);RNA binding(GO:0003723);nuclease activity(GO:0004518);exonuclease activity(GO:0004527);RNA nuclease activity(GO:0004540);protein binding(GO:0005515);poly(U) RNA binding(GO:0008266);hydrolase activity(GO:0016787);metal ion binding(GO:0046872)	mitotic cell cycle(GO:0000278);nuclear-transcribed mRNA catabolic process, exonucleolytic(GO:0000291);mRNA catabolic process(GO:0006402);cell cycle(GO:0007049);negative regulation of cell population proliferation(GO:0008285);miRNA catabolic process(GO:0010587);stem cell population maintenance(GO:0019827);nuclear-transcribed mRNA catabolic process, exonucleolytic, 3'-5'(GO:0034427);cell division(G…	P-body(GO:0000932);cytoplasm(GO:0005737);cytosol(GO:0005829)						Mus musculus
MOUSE|MGI=MGI=2140076|UniProtKB=Q3U1G5	Q3U1G5	Interferon-stimulated 20 kDa exonuclease-like 2;Isg20l2;PTN000301129;orthologs	INTERFERON-STIMULATED 20 KDA EXONUCLEASE-LIKE 2 (PTHR12801:SF78)	exonuclease activity(GO:0004527)		nucleus(GO:0005634)	exoribonuclease(PC00099)		3'-5'-RNA exonuclease activity(GO:0000175);nucleic acid binding(GO:0003676);nuclease activity(GO:0004518);exonuclease activity(GO:0004527);hydrolase activity(GO:0016787)	ribosome biogenesis(GO:0042254)	nucleus(GO:0005634)	rRNA processing;Major pathway of rRNA processing in the nucleolus and cytosol;Metabolism of RNA;rRNA processing in the nucleus and cytosol					Mus musculus
MOUSE|MGI=MGI=2153887|UniProtKB=Q8C460	Q8C460	ERI1 exoribonuclease 3;Eri3;PTN000549066;orthologs	ERI1 EXORIBONUCLEASE 3 (PTHR23044:SF61)				exoribonuclease(PC00099)		3'-5'-RNA exonuclease activity(GO:0000175);nucleic acid binding(GO:0003676);nuclease activity(GO:0004518);exonuclease activity(GO:0004527);hydrolase activity(GO:0016787);metal ion binding(GO:0046872)	exonucleolytic trimming to generate mature 3'-end of 5.8S rRNA from tricistronic rRNA transcript (SSU-rRNA, 5.8S rRNA, LSU-rRNA)(GO:0000467)	plasma membrane(GO:0005886)						Mus musculus
MOUSE|MGI=MGI=1915526|UniProtKB=Q9D2E2	Q9D2E2	Target of EGR1 protein 1;Toe1;PTN000387165;orthologs	TARGET OF EGR1 PROTEIN 1 (PTHR15092:SF37)	3'-5'-RNA exonuclease activity(GO:0000175);snRNA binding(GO:0017069)	snRNA 3'-end processing(GO:0034472)	nuclear body(GO:0016604);cytoplasm(GO:0005737)	mRNA polyadenylation factor(PC00146)		3'-5'-RNA exonuclease activity(GO:0000175);nucleic acid binding(GO:0003676);poly(A)-specific ribonuclease activity(GO:0004535);snRNA binding(GO:0017069);metal ion binding(GO:0046872)	snRNA 3'-end processing(GO:0034472)	nucleus(GO:0005634);nucleoplasm(GO:0005654);cytoplasm(GO:0005737);Cajal body(GO:0015030);nuclear body(GO:0016604)						Mus musculus
MOUSE|MGI=MGI=1918951|UniProtKB=Q8K1R3	Q8K1R3	Polyribonucleotide nucleotidyltransferase 1, mitochondrial;Pnpt1;PTN000134210;orthologs	POLYRIBONUCLEOTIDE NUCLEOTIDYLTRANSFERASE 1, MITOCHONDRIAL (PTHR11252:SF0)	3'-5'-RNA exonuclease activity(GO:0000175);nucleotidyltransferase activity(GO:0016779)	RNA catabolic process(GO:0006401)	cytosol(GO:0005829)	nucleotidyltransferase(PC00174)		3'-5'-RNA exonuclease activity(GO:0000175);nucleic acid binding(GO:0003676);RNA binding(GO:0003723);nuclease activity(GO:0004518);exonuclease activity(GO:0004527);polyribonucleotide nucleotidyltransferase activity(GO:0004654);poly(U) RNA binding(GO:0008266);transferase activity(GO:0016740);nucleotidyltransferase activity(GO:0016779);hydrolase activity(GO:0016787);poly(G) binding(GO:0034046);miRNA…	mitochondrial RNA catabolic process(GO:0000957);mitochondrial mRNA catabolic process(GO:0000958);positive regulation of mitochondrial RNA catabolic process(GO:0000962);mitochondrial RNA 5'-end processing(GO:0000964);mitochondrial RNA 3'-end processing(GO:0000965);RNA processing(GO:0006396);mRNA processing(GO:0006397);RNA catabolic process(GO:0006401);mRNA catabolic process(GO:0006402);mitochondri…	cytoplasm(GO:0005737);mitochondrion(GO:0005739);mitochondrial intermembrane space(GO:0005758);endoplasmic reticulum membrane(GO:0005789);cytosol(GO:0005829);ribosome(GO:0005840);membrane(GO:0016020);mitochondrial degradosome(GO:0045025)						Mus musculus
MOUSE|MGI=MGI=1914526|UniProtKB=Q7TMF2	Q7TMF2	3'-5' exoribonuclease 1;Eri1;PTN000549038;orthologs	3'-5' EXORIBONUCLEASE 1 (PTHR23044:SF77)	3'-5'-RNA exonuclease activity(GO:0000175)	RNA 3'-end processing(GO:0031123);maturation of 5.8S rRNA from tricistronic rRNA transcript (SSU-rRNA, 5.8S rRNA, LSU-rRNA)(GO:0000466)		exoribonuclease(PC00099)		3'-5'-RNA exonuclease activity(GO:0000175);nucleic acid binding(GO:0003676);RNA binding(GO:0003723);nuclease activity(GO:0004518);exonuclease activity(GO:0004527);protein binding(GO:0005515);3'-5' exonuclease activity(GO:0008408);hydrolase activity(GO:0016787);rRNA binding(GO:0019843);ribosome binding(GO:0043022);metal ion binding(GO:0046872);histone pre-mRNA stem-loop binding(GO:0071207)	exonucleolytic trimming to generate mature 3'-end of 5.8S rRNA from tricistronic rRNA transcript (SSU-rRNA, 5.8S rRNA, LSU-rRNA)(GO:0000467);rRNA processing(GO:0006364);regulatory ncRNA-mediated gene silencing(GO:0031047);rRNA 3'-end processing(GO:0031125)	nucleus(GO:0005634);nucleolus(GO:0005730);cytoplasm(GO:0005737);histone pre-mRNA 3'end processing complex(GO:0071204)	rRNA processing;Major pathway of rRNA processing in the nucleolus and cytosol;Metabolism of RNA;rRNA processing in the nucleus and cytosol					Mus musculus
MOUSE|MGI=MGI=1928895|UniProtKB=Q9JL16	Q9JL16	Interferon-stimulated gene 20 kDa protein;Isg20;PTN000301094;orthologs	INTERFERON-STIMULATED GENE 20 KDA PROTEIN (PTHR12801:SF59)	exonuclease activity(GO:0004527)	defense response to virus(GO:0051607);negative regulation of biological process(GO:0048519);RNA catabolic process(GO:0006401)	nucleus(GO:0005634)	exoribonuclease(PC00099)		3'-5'-RNA exonuclease activity(GO:0000175);nucleic acid binding(GO:0003676);RNA binding(GO:0003723);nuclease activity(GO:0004518);exonuclease activity(GO:0004527);single-stranded DNA 3'-5' DNA exonuclease activity(GO:0008310);exoribonuclease II activity(GO:0008859);hydrolase activity(GO:0016787);U1 snRNA binding(GO:0030619);U2 snRNA binding(GO:0030620);U3 snoRNA binding(GO:0034511);metal ion bind…	immune system process(GO:0002376);DNA catabolic process(GO:0006308);rRNA processing(GO:0006364);RNA catabolic process(GO:0006401);response to virus(GO:0009615);negative regulation of viral genome replication(GO:0045071);innate immune response(GO:0045087);defense response to virus(GO:0051607)	nucleus(GO:0005634);nucleolus(GO:0005730);cytoplasm(GO:0005737);Cajal body(GO:0015030);PML body(GO:0016605)						Mus musculus
MOUSE|MGI=MGI=1298230|UniProtKB=Q60809	Q60809	CCR4-NOT transcription complex subunit 7;Cnot7;PTN000084130;orthologs	CCR4-NOT TRANSCRIPTION COMPLEX SUBUNIT 7 (PTHR10797:SF0)	3'-5'-RNA exonuclease activity(GO:0000175)	nuclear-transcribed mRNA catabolic process, deadenylation-dependent decay(GO:0000288)	P-body(GO:0000932);CCR4-NOT complex(GO:0030014)	mRNA polyadenylation factor(PC00146)		3'-5'-RNA exonuclease activity(GO:0000175);nucleic acid binding(GO:0003676);transcription corepressor activity(GO:0003714);RNA binding(GO:0003723);nuclease activity(GO:0004518);exonuclease activity(GO:0004527);RNA exonuclease activity(GO:0004532);poly(A)-specific ribonuclease activity(GO:0004535);protein binding(GO:0005515);hydrolase activity(GO:0016787);metal ion binding(GO:0046872);DNA-binding …	nuclear-transcribed mRNA poly(A) tail shortening(GO:0000289);deadenylation-dependent decapping of nuclear-transcribed mRNA(GO:0000290);regulation of translation(GO:0006417);positive regulation of cell population proliferation(GO:0008284);negative regulation of cell population proliferation(GO:0008285);negative regulation of gene expression(GO:0010629);regulatory ncRNA-mediated gene silencing(GO:0…	P-body(GO:0000932);nucleus(GO:0005634);cytoplasm(GO:0005737);cytosol(GO:0005829);nuclear body(GO:0016604);nuclear speck(GO:0016607);CCR4-NOT complex(GO:0030014);CCR4-NOT core complex(GO:0030015);intracellular non-membrane-bounded organelle(GO:0043232)	Generic Transcription Pathway;TP53 regulates transcription of additional cell cycle genes whose exact role in the p53 pathway remain uncertain;Transcriptional Regulation by TP53;Deadenylation of mRNA;Metabolism of RNA;RNA Polymerase II Transcription;Deadenylation-dependent mRNA decay;TP53 Regulates Transcription of Cell Cycle Genes;Gene expression (Transcription)					Mus musculus
MOUSE|MGI=MGI=1919912|UniProtKB=Q9CSH3	Q9CSH3	Exosome complex exonuclease RRP44;Dis3;PTN000599231;orthologs	EXOSOME COMPLEX EXONUCLEASE RRP44 (PTHR23355:SF35)	3'-5'-RNA exonuclease activity(GO:0000175);endonuclease activity(GO:0004519)	rRNA metabolic process(GO:0016072);RNA catabolic process(GO:0006401)	nuclear protein-containing complex(GO:0140513);cytoplasm(GO:0005737);nuclear lumen(GO:0031981);exosome (RNase complex)(GO:0000178)	exoribonuclease(PC00099)		3'-5'-RNA exonuclease activity(GO:0000175);RNA binding(GO:0003723);nuclease activity(GO:0004518);endonuclease activity(GO:0004519);exonuclease activity(GO:0004527);RNA nuclease activity(GO:0004540);guanyl-nucleotide exchange factor activity(GO:0005085);hydrolase activity(GO:0016787)	rRNA processing(GO:0006364);RNA processing(GO:0006396);RNA catabolic process(GO:0006401);rRNA catabolic process(GO:0016075);CUT catabolic process(GO:0071034)	nuclear exosome (RNase complex)(GO:0000176);cytoplasmic exosome (RNase complex)(GO:0000177);exosome (RNase complex)(GO:0000178);nucleus(GO:0005634);nucleoplasm(GO:0005654);cytoplasm(GO:0005737);cytosol(GO:0005829)	mRNA decay by 3' to 5' exoribonuclease;Regulation of mRNA stability by proteins that bind AU-rich elements;rRNA processing;KSRP (KHSRP) binds and destabilizes mRNA;Metabolism of RNA;Deadenylation-dependent mRNA decay;Tristetraprolin (TTP, ZFP36) binds and destabilizes mRNA;Major pathway of rRNA processing in the nucleolus and cytosol;Butyrate Response Factor 1 (BRF1) binds and destabilizes mRNA;r…					Mus musculus
MOUSE|MGI=MGI=2143272|UniProtKB=Q8C0S1	Q8C0S1	DIS3-like exonuclease 1;Dis3l;PTN000599195;orthologs	DIS3-LIKE EXONUCLEASE 1 (PTHR23355:SF30)	3'-5'-RNA exonuclease activity(GO:0000175)			exoribonuclease(PC00099)		3'-5'-RNA exonuclease activity(GO:0000175);RNA binding(GO:0003723);nuclease activity(GO:0004518);exonuclease activity(GO:0004527);RNA nuclease activity(GO:0004540);exoribonuclease II activity(GO:0008859);hydrolase activity(GO:0016787);enzyme binding(GO:0019899)	RNA processing(GO:0006396);RNA catabolic process(GO:0006401);rRNA catabolic process(GO:0016075)	cytoplasmic exosome (RNase complex)(GO:0000177);exosome (RNase complex)(GO:0000178);cytoplasm(GO:0005737);centrosome(GO:0005813);cytosol(GO:0005829);plasma membrane(GO:0005886)						Mus musculus
MOUSE|MGI=MGI=894687|UniProtKB=Q9DBR1	Q9DBR1	5'-3' exoribonuclease 2;Xrn2;PTN000269426;orthologs	5'-3' EXORIBONUCLEASE 2 (PTHR12341:SF77)				exoribonuclease(PC00099)	DNA replication->5' to 3' Exoribonuclease;;	3'-5'-RNA exonuclease activity(GO:0000175);transcription termination site sequence-specific DNA binding(GO:0001147);nucleic acid binding(GO:0003676);DNA binding(GO:0003677);RNA binding(GO:0003723);nuclease activity(GO:0004518);exonuclease activity(GO:0004527);5'-3' RNA exonuclease activity(GO:0004534);protein binding(GO:0005515);5'-3' exonuclease activity(GO:0008409);hydrolase activity(GO:0016787…	nuclear-transcribed mRNA catabolic process(GO:0000956);nucleobase-containing compound metabolic process(GO:0006139);DNA repair(GO:0006281);DNA recombination(GO:0006310);DNA-templated transcription termination(GO:0006353);termination of RNA polymerase II transcription(GO:0006369);mRNA processing(GO:0006397);microtubule-based process(GO:0007017);spermatogenesis(GO:0007283);RNA metabolic process(GO:…	nucleus(GO:0005634);nucleoplasm(GO:0005654);nucleolus(GO:0005730);aggresome(GO:0016235)	rRNA processing;Major pathway of rRNA processing in the nucleolus and cytosol;Metabolism of RNA;rRNA processing in the nucleus and cytosol					Mus musculus
MOUSE|MGI=MGI=1333863|UniProtKB=Q61409	Q61409	cGMP-inhibited 3',5'-cyclic phosphodiesterase B;Pde3b;PTN000142467;orthologs	PHOSPHODIESTERASE (PTHR11347:SF29)	protein kinase binding(GO:0019901);3',5'-cyclic-GMP phosphodiesterase activity(GO:0047555)	signal transduction(GO:0007165)	membrane(GO:0016020)	phosphodiesterase(PC00185)		3',5'-cyclic-nucleotide phosphodiesterase activity(GO:0004114);3',5'-cyclic-AMP phosphodiesterase activity(GO:0004115);protein binding(GO:0005515);phosphoric diester hydrolase activity(GO:0008081);hydrolase activity(GO:0016787);protein kinase B binding(GO:0043422);metal ion binding(GO:0046872);3',5'-cyclic-GMP phosphodiesterase activity(GO:0047555);phosphoprotein binding(GO:0051219)	angiogenesis(GO:0001525);negative regulation of cell adhesion(GO:0007162);signal transduction(GO:0007165);negative regulation of angiogenesis(GO:0016525);cAMP-mediated signaling(GO:0019933);endocrine pancreas development(GO:0031018);cellular response to insulin stimulus(GO:0032869);glucose homeostasis(GO:0042593);negative regulation of cAMP-mediated signaling(GO:0043951);regulation of angiogenesi…	endoplasmic reticulum(GO:0005783);Golgi apparatus(GO:0005794);cytosol(GO:0005829);membrane(GO:0016020);guanyl-nucleotide exchange factor complex(GO:0032045)	Signaling by Receptor Tyrosine Kinases;PDE3B signalling;IGF1R signaling cascade;Signaling by Type 1 Insulin-like Growth Factor 1 Receptor (IGF1R);Signaling by Insulin receptor;IRS-mediated signalling;Insulin receptor signalling cascade;Signaling by GPCR;G alpha (s) signalling events;PI3K Cascade;PKB-mediated events;GPCR downstream signalling;Signal Transduction;IRS-related events triggered by IGF…					Mus musculus
MOUSE|MGI=MGI=1916942|UniProtKB=Q3SXD3	Q3SXD3	5'-deoxynucleotidase HDDC2;Hddc2;PTN000217790;orthologs	5'-DEOXYNUCLEOTIDASE HDDC2 (PTHR11845:SF13)	phosphatase activity(GO:0016791)		cytoplasm(GO:0005737)			5'-deoxynucleotidase activity(GO:0002953);hydrolase activity(GO:0016787);metal ion binding(GO:0046872)		mitochondrion(GO:0005739)						Mus musculus
MOUSE|MGI=MGI=2442446|UniProtKB=Q8C5P5	Q8C5P5	5'-nucleotidase domain-containing protein 1;Nt5dc1;PTN000250829;orthologs	5'-NUCLEOTIDASE DOMAIN-CONTAINING PROTEIN 1 (PTHR12103:SF12)	5'-nucleotidase activity(GO:0008253)			nucleotide phosphatase(PC00173)		5'-nucleotidase activity(GO:0008253);hydrolase activity(GO:0016787);metal ion binding(GO:0046872)		cellular_component(GO:0005575)						Mus musculus
MOUSE|MGI=MGI=1914489|UniProtKB=Q9JJ80	Q9JJ80	Ribosome production factor 2 homolog;Rpf2;PTN000296210;orthologs	RIBOSOME PRODUCTION FACTOR 2 HOMOLOG (PTHR12728:SF0)	rRNA binding(GO:0019843)	maturation of LSU-rRNA from tricistronic rRNA transcript (SSU-rRNA, 5.8S rRNA, LSU-rRNA)(GO:0000463);ribosomal large subunit assembly(GO:0000027)	nucleolus(GO:0005730)			5S rRNA binding(GO:0008097);rRNA binding(GO:0019843)	ribosomal large subunit assembly(GO:0000027);maturation of LSU-rRNA from tricistronic rRNA transcript (SSU-rRNA, 5.8S rRNA, LSU-rRNA)(GO:0000463);maturation of LSU-rRNA(GO:0000470);rRNA processing(GO:0006364);ribosome biogenesis(GO:0042254);ribosomal large subunit biogenesis(GO:0042273);regulation of signal transduction by p53 class mediator(GO:1901796);protein localization to nucleolus(GO:190257…	nucleus(GO:0005634);nucleoplasm(GO:0005654);chromosome(GO:0005694);nucleolus(GO:0005730)						Mus musculus
MOUSE|MGI=MGI=97836|UniProtKB=Q8BVI4	Q8BVI4	Dihydropteridine reductase;Qdpr;PTN000387445;orthologs	DIHYDROPTERIDINE REDUCTASE (PTHR15104:SF0)	oxidoreductase activity(GO:0016491);purine nucleotide binding(GO:0017076);anion binding(GO:0043168)	alpha-amino acid metabolic process(GO:1901605);amino acid catabolic process(GO:0009063);aromatic amino acid family catabolic process(GO:0009074);cellular nitrogen compound biosynthetic process(GO:0044271);heterocycle biosynthetic process(GO:0018130);organic cyclic compound biosynthetic process(GO:1901362);alcohol biosynthetic process(GO:0046165);organonitrogen compound biosynthetic process(GO:190…	cytoplasm(GO:0005737)	reductase(PC00198)		6,7-dihydropteridine reductase activity(GO:0004155);oxidoreductase activity(GO:0016491);identical protein binding(GO:0042802);NADPH binding(GO:0070402);NADH binding(GO:0070404)	L-phenylalanine catabolic process(GO:0006559);tetrahydrobiopterin biosynthetic process(GO:0006729)	cytoplasm(GO:0005737);mitochondrion(GO:0005739)	Phenylalanine metabolism;Phenylalanine and tyrosine metabolism;Metabolism;Metabolism of amino acids and derivatives					Mus musculus
MOUSE|MGI=MGI=2148491|UniProtKB=Q921H8	Q921H8	3-ketoacyl-CoA thiolase A, peroxisomal;Acaa1a;PTN000432397;orthologs	3-KETOACYL-COA THIOLASE A, PEROXISOMAL (PTHR43853:SF19)	acyltransferase activity, transferring groups other than amino-acyl groups(GO:0016747)	aromatic compound catabolic process(GO:0019439);fatty acid beta-oxidation(GO:0006635);organic cyclic compound catabolic process(GO:1901361);cellular response to chemical stimulus(GO:0070887)	peroxisome(GO:0005777)	acetyltransferase(PC00038)		acetyl-CoA C-acetyltransferase activity(GO:0003985);acetyl-CoA C-acyltransferase activity(GO:0003988);acetate CoA-transferase activity(GO:0008775);palmitoyl-CoA oxidase activity(GO:0016401);transferase activity(GO:0016740);acyltransferase activity(GO:0016746);acyltransferase activity, transferring groups other than amino-acyl groups(GO:0016747);acetyl-CoA C-myristoyltransferase activity(GO:005063…	very long-chain fatty acid metabolic process(GO:0000038);lipid metabolic process(GO:0006629);fatty acid metabolic process(GO:0006631);fatty acid beta-oxidation(GO:0006635);response to nutrient(GO:0007584);bile acid metabolic process(GO:0008206);phenylacetate catabolic process(GO:0010124);response to steroid hormone(GO:0048545)	mitochondrion(GO:0005739);peroxisome(GO:0005777);peroxisomal matrix(GO:0005782)						Mus musculus
MOUSE|MGI=MGI=2136381|UniProtKB=Q99JY0	Q99JY0	Trifunctional enzyme subunit beta, mitochondrial;Hadhb;PTN000432349;orthologs	TRIFUNCTIONAL ENZYME SUBUNIT BETA, MITOCHONDRIAL (PTHR18919:SF153)				acyltransferase(PC00042)		acetyl-CoA C-acetyltransferase activity(GO:0003985);acetyl-CoA C-acyltransferase activity(GO:0003988);protein binding(GO:0005515);transferase activity(GO:0016740);acyltransferase activity(GO:0016746);acyltransferase activity, transferring groups other than amino-acyl groups(GO:0016747);protein-containing complex binding(GO:0044877);acetyl-CoA C-myristoyltransferase activity(GO:0050633);lncRNA bin…	lipid metabolic process(GO:0006629);fatty acid metabolic process(GO:0006631);fatty acid beta-oxidation(GO:0006635);gene expression(GO:0010467);cellular response to lipopolysaccharide(GO:0071222)	mitochondrion(GO:0005739);mitochondrial outer membrane(GO:0005741);mitochondrial inner membrane(GO:0005743);endoplasmic reticulum(GO:0005783);membrane(GO:0016020);mitochondrial fatty acid beta-oxidation multienzyme complex(GO:0016507);mitochondrial nucleoid(GO:0042645)	Mitochondrial Fatty Acid Beta-Oxidation;Beta oxidation of lauroyl-CoA to decanoyl-CoA-CoA;mitochondrial fatty acid beta-oxidation of saturated fatty acids;Beta oxidation of palmitoyl-CoA to myristoyl-CoA;Beta oxidation of myristoyl-CoA to lauroyl-CoA;Glycerophospholipid biosynthesis;Acyl chain remodeling of CL;Phospholipid metabolism;Fatty acid metabolism;Metabolism of lipids;Beta oxidation of oc…					Mus musculus
MOUSE|MGI=MGI=1098623|UniProtKB=Q8BWT1	Q8BWT1	3-ketoacyl-CoA thiolase, mitochondrial;Acaa2;PTN000432206;orthologs	3-KETOACYL-COA THIOLASE, MITOCHONDRIAL (PTHR18919:SF107)				acyltransferase(PC00042)		acetyl-CoA C-acetyltransferase activity(GO:0003985);acetyl-CoA hydrolase activity(GO:0003986);acetyl-CoA C-acyltransferase activity(GO:0003988);transferase activity(GO:0016740);acyltransferase activity(GO:0016746);acyltransferase activity, transferring groups other than amino-acyl groups(GO:0016747);hydrolase activity(GO:0016787);fatty acyl-CoA hydrolase activity(GO:0047617)	acetyl-CoA metabolic process(GO:0006084);lipid metabolic process(GO:0006629);fatty acid metabolic process(GO:0006631);fatty acid beta-oxidation(GO:0006635);cellular response to hypoxia(GO:0071456);negative regulation of mitochondrial outer membrane permeabilization involved in apoptotic signaling pathway(GO:1901029);negative regulation of mitochondrial membrane permeability involved in apoptotic …	mitochondrion(GO:0005739);mitochondrial inner membrane(GO:0005743);mitochondrial matrix(GO:0005759)	Mitochondrial Fatty Acid Beta-Oxidation;Fatty acid metabolism;Metabolism of lipids;Metabolism					Mus musculus
MOUSE|MGI=MGI=87870|UniProtKB=Q8QZT1	Q8QZT1	Acetyl-CoA acetyltransferase, mitochondrial;Acat1;PTN000432254;orthologs	ACETYL-COA ACETYLTRANSFERASE, MITOCHONDRIAL (PTHR18919:SF156)	acetyltransferase activity(GO:0016407)	fatty acid beta-oxidation(GO:0006635)	mitochondrion(GO:0005739)	acyltransferase(PC00042)	CCKR signaling map->ACAT1;;CCKR signaling map->ACAT1;;;	acetyl-CoA C-acetyltransferase activity(GO:0003985);C-acetyltransferase activity(GO:0016453);transferase activity(GO:0016740);acyltransferase activity(GO:0016746);acyltransferase activity, transferring groups other than amino-acyl groups(GO:0016747);enzyme binding(GO:0019899);potassium ion binding(GO:0030955);cholesterol O-acyltransferase activity(GO:0034736);identical protein binding(GO:0042802)…	acetyl-CoA biosynthetic process(GO:0006085);isoleucine catabolic process(GO:0006550);lipid metabolic process(GO:0006629);fatty acid metabolic process(GO:0006631);fatty acid beta-oxidation(GO:0006635);coenzyme A metabolic process(GO:0015936);coenzyme A biosynthetic process(GO:0015937);acetyl-CoA catabolic process(GO:0046356);ketone body catabolic process(GO:0046952);propionyl-CoA biosynthetic proc…	mitochondrion(GO:0005739);mitochondrial inner membrane(GO:0005743);mitochondrial matrix(GO:0005759);endoplasmic reticulum(GO:0005783)	Ketone body metabolism;Synthesis of Ketone Bodies;Utilization of Ketone Bodies;Metabolism of lipids;Branched-chain amino acid catabolism;Metabolism;Metabolism of amino acids and derivatives					Mus musculus
MOUSE|MGI=MGI=87871|UniProtKB=Q8CAY6	Q8CAY6	Acetyl-CoA acetyltransferase, cytosolic;Acat2;PTN000432142;orthologs	ACETYL-COA ACETYLTRANSFERASE, CYTOSOLIC (PTHR18919:SF171)	acetyltransferase activity(GO:0016407)	fatty acid beta-oxidation(GO:0006635)	mitochondrion(GO:0005739)	acyltransferase(PC00042)		acetyl-CoA C-acetyltransferase activity(GO:0003985);transferase activity(GO:0016740);acyltransferase activity(GO:0016746);acyltransferase activity, transferring groups other than amino-acyl groups(GO:0016747)	fatty acid beta-oxidation(GO:0006635);positive regulation of intestinal cholesterol absorption(GO:0045797)	cytoplasm(GO:0005737);mitochondrion(GO:0005739)	Metabolism of steroids;Cholesterol biosynthesis;Metabolism of lipids;Metabolism					Mus musculus
MOUSE|MGI=MGI=1921406|UniProtKB=Q9DBK0	Q9DBK0	Acetyl-coenzyme A thioesterase;Acot12;PTN000114419;orthologs	ACETYL-COENZYME A THIOESTERASE (PTHR11049:SF3)	thiolester hydrolase activity(GO:0016790)	acyl-CoA metabolic process(GO:0006637)	extracellular space(GO:0005615);cytosol(GO:0005829);vesicle(GO:0031982)	esterase(PC00097)		acetyl-CoA hydrolase activity(GO:0003986);ATP binding(GO:0005524);lipid binding(GO:0008289);hydrolase activity(GO:0016787);thiolester hydrolase activity(GO:0016790);identical protein binding(GO:0042802);carboxylic ester hydrolase activity(GO:0052689)	acetyl-CoA metabolic process(GO:0006084);lipid metabolic process(GO:0006629);fatty acid metabolic process(GO:0006631);acyl-CoA metabolic process(GO:0006637)	nucleoplasm(GO:0005654);cytoplasm(GO:0005737);cytosol(GO:0005829);intercellular bridge(GO:0045171)	Mitochondrial Fatty Acid Beta-Oxidation;Fatty acid metabolism;Metabolism of lipids;Metabolism					Mus musculus
MOUSE|MGI=MGI=1928939|UniProtKB=Q9R0X4	Q9R0X4	Acyl-coenzyme A thioesterase 9, mitochondrial;Acot9;PTN000291832;orthologs	ACYL-COENZYME A THIOESTERASE 9, MITOCHONDRIAL (PTHR12655:SF0)	thiolester hydrolase activity(GO:0016790)	acyl-CoA metabolic process(GO:0006637)		esterase(PC00097)		acetyl-CoA hydrolase activity(GO:0003986);protein binding(GO:0005515);hydrolase activity(GO:0016787);fatty acyl-CoA hydrolase activity(GO:0047617);carboxylic ester hydrolase activity(GO:0052689)	long-chain fatty acid metabolic process(GO:0001676);acyl-CoA metabolic process(GO:0006637);short-chain fatty acid metabolic process(GO:0046459)	mitochondrion(GO:0005739);mitochondrial matrix(GO:0005759)	Mitochondrial Fatty Acid Beta-Oxidation;Fatty acid metabolism;Metabolism of lipids;Metabolism					Mus musculus
MOUSE|MGI=MGI=1332247|UniProtKB=Q99J27	Q99J27	Acetyl-coenzyme A transporter 1;Slc33a1;PTN000299739;orthologs	ACETYL-COENZYME A TRANSPORTER 1 (PTHR12778:SF9)				secondary carrier transporter(PC00258)		acetyl-CoA transmembrane transporter activity(GO:0008521);protein homodimerization activity(GO:0042803)	acetyl-CoA transmembrane transport(GO:0035348)	endoplasmic reticulum(GO:0005783);endoplasmic reticulum membrane(GO:0005789);membrane(GO:0016020)	Transport of small molecules;SLC-mediated transmembrane transport;Transport of vitamins, nucleosides, and related molecules					Mus musculus
MOUSE|MGI=MGI=1915080|UniProtKB=Q9CQU3	Q9CQU3	Protein RER1;Rer1;PTN000078485;orthologs	PROTEIN RER1 (PTHR10743:SF0)		maintenance of location in cell(GO:0051651);retrograde vesicle-mediated transport, Golgi to endoplasmic reticulum(GO:0006890);protein localization to endoplasmic reticulum(GO:0070972)				acetylcholine receptor binding(GO:0033130)	protein retention in ER lumen(GO:0006621);retrograde vesicle-mediated transport, Golgi to endoplasmic reticulum(GO:0006890);neuromuscular junction development(GO:0007528);skeletal muscle acetylcholine-gated channel clustering(GO:0071340);positive regulation of protein localization to plasma membrane(GO:1903078)	Golgi membrane(GO:0000139);endoplasmic reticulum-Golgi intermediate compartment(GO:0005793);Golgi apparatus(GO:0005794);plasma membrane(GO:0005886);cell surface(GO:0009986);membrane(GO:0016020)						Mus musculus
MOUSE|MGI=MGI=106651|UniProtKB=Q64253	Q64253	Lymphocyte antigen 6E;Ly6e;PTN000424527;orthologs	LYMPHOCYTE ANTIGEN 6E (PTHR16983:SF13)	acetylcholine receptor regulator activity(GO:0030548);molecular function inhibitor activity(GO:0140678)		plasma membrane(GO:0005886)	protein-binding activity modulator(PC00095)		acetylcholine receptor inhibitor activity(GO:0030550);acetylcholine receptor binding(GO:0033130)	in utero embryonic development(GO:0001701);adrenal gland development(GO:0030325);organ growth(GO:0035265);norepinephrine metabolic process(GO:0042415);negative regulation of viral entry into host cell(GO:0046597);epinephrine secretion(GO:0048242);ventricular cardiac muscle tissue morphogenesis(GO:0055010);acetylcholine receptor signaling pathway(GO:0095500)	plasma membrane(GO:0005886);membrane(GO:0016020);side of membrane(GO:0098552)	Post-translational modification: synthesis of GPI-anchored proteins;Post-translational protein modification;Metabolism of proteins					Mus musculus
MOUSE|MGI=MGI=96882|UniProtKB=P0CW02	P0CW02	Lymphocyte antigen 6C1;Ly6c1;PTN000795588;orthologs	LYMPHOCYTE ANTIGEN 6 COMPLEX, LOCUS G2-RELATED (PTHR32217:SF3)	acetylcholine receptor regulator activity(GO:0030548);molecular function inhibitor activity(GO:0140678);signaling receptor binding(GO:0005102)	synaptic signaling(GO:0099536);signal transduction(GO:0007165);cellular response to organonitrogen compound(GO:0071417);cellular response to oxygen-containing compound(GO:1901701)	plasma membrane(GO:0005886)			acetylcholine receptor inhibitor activity(GO:0030550);acetylcholine receptor binding(GO:0033130)	acetylcholine receptor signaling pathway(GO:0095500)	plasma membrane(GO:0005886);external side of plasma membrane(GO:0009897);cell surface(GO:0009986);membrane(GO:0016020);side of membrane(GO:0098552)						Mus musculus
MOUSE|MGI=MGI=3712069|UniProtKB=P0CW03	P0CW03	Lymphocyte antigen 6C2;Ly6c2;PTN000795592;orthologs	LYMPHOCYTE ANTIGEN 6 COMPLEX, LOCUS G2-RELATED (PTHR32217:SF3)	acetylcholine receptor regulator activity(GO:0030548);molecular function inhibitor activity(GO:0140678);signaling receptor binding(GO:0005102)	synaptic signaling(GO:0099536);signal transduction(GO:0007165);cellular response to organonitrogen compound(GO:0071417);cellular response to oxygen-containing compound(GO:1901701)	plasma membrane(GO:0005886)			acetylcholine receptor inhibitor activity(GO:0030550);acetylcholine receptor binding(GO:0033130)	acetylcholine receptor signaling pathway(GO:0095500)	plasma membrane(GO:0005886);cell surface(GO:0009986);membrane(GO:0016020);side of membrane(GO:0098552)						Mus musculus
MOUSE|MGI=MGI=105386|UniProtKB=P53395	P53395	Lipoamide acyltransferase component of branched-chain alpha-keto acid dehydrogenase complex, mitochondrial;Dbt;PTN000567880;orthologs	LIPOAMIDE ACYLTRANSFERASE COMPONENT OF BRANCHED-CHAIN ALPHA-KETO ACID DEHYDROGENASE COMPLEX, MITOCHONDRIAL (PTHR43178:SF5)	fatty acid binding(GO:0005504);acetyltransferase activity(GO:0016407);heterocyclic compound binding(GO:1901363);organic cyclic compound binding(GO:0097159)		cytoplasm(GO:0005737)	acetyltransferase(PC00038)		acetyltransferase activity(GO:0016407);transferase activity(GO:0016740);acyltransferase activity(GO:0016746);lipoic acid binding(GO:0031405);ubiquitin protein ligase binding(GO:0031625);dihydrolipoyllysine-residue (2-methylpropanoyl)transferase activity(GO:0043754)	branched-chain amino acid catabolic process(GO:0009083)	cytoplasm(GO:0005737);mitochondrion(GO:0005739);cytosol(GO:0005829);mitochondrial alpha-ketoglutarate dehydrogenase complex(GO:0005947);microtubule cytoskeleton(GO:0015630);mitochondrial nucleoid(GO:0042645)	Signaling by Rho GTPases;Branched-chain amino acid catabolism;Glyoxylate metabolism and glycine degradation;RHOH GTPase cycle;Metabolism of amino acids and derivatives;RHO GTPase cycle;Metabolism;Signal Transduction;Signaling by Rho GTPases, Miro GTPases and RHOBTB3					Mus musculus
MOUSE|MGI=MGI=87883|UniProtKB=Q05117	Q05117	Tartrate-resistant acid phosphatase type 5;Acp5;PTN000017848;orthologs	TARTRATE-RESISTANT ACID PHOSPHATASE TYPE 5 (PTHR10161:SF14)	ferrous iron binding(GO:0008198);phosphatase activity(GO:0016791)			phosphatase(PC00181)		acid phosphatase activity(GO:0003993);ferrous iron binding(GO:0008198);ferric iron binding(GO:0008199);hydrolase activity(GO:0016787);metal ion binding(GO:0046872)	nitric oxide biosynthetic process(GO:0006809);negative regulation of cell adhesion(GO:0007162);macrophage cytokine production(GO:0010934);negative regulation of macrophage cytokine production(GO:0010936);dephosphorylation(GO:0016311);positive regulation of cell migration(GO:0030335);response to lipopolysaccharide(GO:0032496);interleukin-1 beta production(GO:0032611);interleukin-12 production(GO:0…	extracellular space(GO:0005615);lysosome(GO:0005764)	Vitamin B2 (riboflavin) metabolism;Metabolism of vitamins and cofactors;Metabolism;Metabolism of water-soluble vitamins and cofactors					Mus musculus
MOUSE|MGI=MGI=1336159|UniProtKB=Q9Z2L6	Q9Z2L6	Multiple inositol polyphosphate phosphatase 1;Minpp1;PTN000469238;orthologs	MULTIPLE INOSITOL POLYPHOSPHATE PHOSPHATASE 1 (PTHR20963:SF57)	inositol phosphate phosphatase activity(GO:0052745)			phosphatase(PC00181)		acid phosphatase activity(GO:0003993);inositol-hexakisphosphate phosphatase activity(GO:0004446);inositol bisphosphate phosphatase activity(GO:0016312);hydrolase activity(GO:0016787);phosphatase activity(GO:0016791);inositol-1,3,4,5,6-pentakisphosphate 3-phosphatase activity(GO:0030351);inositol-1,4,5,6-tetrakisphosphate 6-phosphatase activity(GO:0030352);bisphosphoglycerate 3-phosphatase activit…	intracellular monoatomic cation homeostasis(GO:0030003)	extracellular space(GO:0005615);endoplasmic reticulum(GO:0005783);endoplasmic reticulum lumen(GO:0005788);plasma membrane(GO:0005886);membrane(GO:0016020)	Inositol phosphate metabolism;Metabolism;Synthesis of IPs in the ER lumen					Mus musculus
MOUSE|MGI=MGI=1915131|UniProtKB=Q9D967	Q9D967	Magnesium-dependent phosphatase 1;Mdp1;PTN000427463;orthologs	MAGNESIUM-DEPENDENT PHOSPHATASE 1 (PTHR17901:SF14)				phosphatase(PC00181)		acid phosphatase activity(GO:0003993);phosphoprotein phosphatase activity(GO:0004721);protein tyrosine phosphatase activity(GO:0004725);hydrolase activity(GO:0016787);phosphatase activity(GO:0016791);metal ion binding(GO:0046872)	fructosamine metabolic process(GO:0030389)							Mus musculus
MOUSE|MGI=MGI=87881|UniProtKB=Q9D358	Q9D358	Low molecular weight phosphotyrosine protein phosphatase;Acp1;PTN000197277;orthologs	LOW MOLECULAR WEIGHT PHOSPHOTYROSINE PROTEIN PHOSPHATASE (PTHR11717:SF34)	protein tyrosine phosphatase activity(GO:0004725)			protein phosphatase(PC00195)		acid phosphatase activity(GO:0003993);phosphoprotein phosphatase activity(GO:0004721);protein tyrosine phosphatase activity(GO:0004725);non-membrane spanning protein tyrosine phosphatase activity(GO:0004726);hydrolase activity(GO:0016787);phosphatase activity(GO:0016791);SH3 domain binding(GO:0017124)	protein dephosphorylation(GO:0006470)	cytoplasm(GO:0005737);cytosol(GO:0005829);cytoplasmic side of plasma membrane(GO:0009898);sarcolemma(GO:0042383)						Mus musculus
MOUSE|MGI=MGI=2144929|UniProtKB=Q99JT9	Q99JT9	Acireductone dioxygenase;Adi1;PTN000602628;orthologs	ACIREDUCTONE DIOXYGENASE (PTHR23418:SF0)	oxidoreductase activity, acting on single donors with incorporation of molecular oxygen, incorporation of two atoms of oxygen(GO:0016702)	sulfur compound metabolic process(GO:0006790);aspartate family amino acid metabolic process(GO:0009066)		oxygenase(PC00177)		acireductone dioxygenase (Ni2+-requiring) activity(GO:0010308);acireductone dioxygenase [iron(II)-requiring] activity(GO:0010309);oxidoreductase activity(GO:0016491);metal ion binding(GO:0046872);dioxygenase activity(GO:0051213)	methionine metabolic process(GO:0006555);amino acid biosynthetic process(GO:0008652);methionine biosynthetic process(GO:0009086);L-methionine salvage from methylthioadenosine(GO:0019509)	nucleus(GO:0005634);cytoplasm(GO:0005737);plasma membrane(GO:0005886);membrane(GO:0016020)	Sulfur amino acid metabolism;Methionine salvage pathway;Metabolism;Metabolism of amino acids and derivatives					Mus musculus
MOUSE|MGI=MGI=87880|UniProtKB=Q99KI0	Q99KI0	Aconitate hydratase, mitochondrial;Aco2;PTN000186553;orthologs	ACONITATE HYDRATASE, MITOCHONDRIAL (PTHR43160:SF3)	hydro-lyase activity(GO:0016836);iron-sulfur cluster binding(GO:0051536)	tricarboxylic acid cycle(GO:0006099)	cytosol(GO:0005829)	hydratase(PC00120)	TCA cycle->Aconitase;;	aconitate hydratase activity(GO:0003994);iron ion binding(GO:0005506);lyase activity(GO:0016829);metal ion binding(GO:0046872);iron-sulfur cluster binding(GO:0051536);3 iron, 4 sulfur cluster binding(GO:0051538);4 iron, 4 sulfur cluster binding(GO:0051539)	tricarboxylic acid cycle(GO:0006099);citrate metabolic process(GO:0006101);isocitrate metabolic process(GO:0006102)	mitochondrion(GO:0005739);mitochondrial matrix(GO:0005759);cytosol(GO:0005829);myelin sheath(GO:0043209)	Citric acid cycle (TCA cycle);The citric acid (TCA) cycle and respiratory electron transport;Metabolism;Pyruvate metabolism and Citric Acid (TCA) cycle					Mus musculus
MOUSE|MGI=MGI=2158329|UniProtKB=Q9ERD8	Q9ERD8	Gamma-parvin;Parvg;PTN000251697;orthologs	GAMMA-PARVIN (PTHR12114:SF1)	actin binding(GO:0003779)	cell projection assembly(GO:0030031);establishment or maintenance of cell polarity(GO:0007163);substrate adhesion-dependent cell spreading(GO:0034446);actin cytoskeleton reorganization(GO:0031532)	focal adhesion(GO:0005925);cytoplasm(GO:0005737);actin cytoskeleton(GO:0015629)	actin and actin related protein(PC00039)		actin binding(GO:0003779)	cell adhesion(GO:0007155);establishment or maintenance of cell polarity(GO:0007163);cell projection assembly(GO:0030031);actin cytoskeleton organization(GO:0030036);substrate adhesion-dependent cell spreading(GO:0034446)	cytoplasm(GO:0005737);cytoskeleton(GO:0005856);plasma membrane(GO:0005886);focal adhesion(GO:0005925);actin cytoskeleton(GO:0015629);membrane(GO:0016020);anchoring junction(GO:0070161)						Mus musculus
MOUSE|MGI=MGI=1926135|UniProtKB=Q9D2V7	Q9D2V7	Coronin-7;Coro7;PTN000091720;orthologs	CORONIN-7 (PTHR10856:SF20)	actin filament binding(GO:0051015)	actin filament organization(GO:0007015)		non-motor actin binding protein(PC00165)		actin binding(GO:0003779)	actin filament organization(GO:0007015);Golgi organization(GO:0007030);protein transport(GO:0015031);cell migration(GO:0016477);establishment of cell polarity(GO:0030010)	cytoplasm(GO:0005737);Golgi apparatus(GO:0005794);trans-Golgi network(GO:0005802);membrane(GO:0016020);cytoplasmic vesicle(GO:0031410)						Mus musculus
MOUSE|MGI=MGI=96832|UniProtKB=P19973	P19973	Lymphocyte-specific protein 1;Lsp1;PTN000248732;orthologs	LYMPHOCYTE-SPECIFIC PROTEIN 1 (PTHR18949:SF1)				non-motor actin binding protein(PC00165)		actin binding(GO:0003779)	apoptotic process(GO:0006915);chemotaxis(GO:0006935);defense response(GO:0006952);cytoskeleton organization(GO:0007010);signal transduction(GO:0007165);cellular response to interleukin-7(GO:0098761)	plasma membrane(GO:0005886);membrane(GO:0016020)						Mus musculus
MOUSE|MGI=MGI=1919546|UniProtKB=Q8BG26	Q8BG26	AP-4 complex accessory subunit RUSC1;Rusc1;PTN000400551;orthologs	AP-4 COMPLEX ACCESSORY SUBUNIT RUSC1 (PTHR15591:SF11)			cytoplasmic vesicle(GO:0031410)			actin binding(GO:0003779)	protein polyubiquitination(GO:0000209)	nucleus(GO:0005634);cytoplasm(GO:0005737);endosome(GO:0005768);early endosome(GO:0005769);Golgi apparatus(GO:0005794);cytosol(GO:0005829);cytoskeleton(GO:0005856);microtubule(GO:0005874);microtubule cytoskeleton(GO:0015630);cytoplasmic vesicle(GO:0031410);synapse(GO:0045202)						Mus musculus
MOUSE|MGI=MGI=2444782|UniProtKB=Q6P9Q6	Q6P9Q6	FK506-binding protein 15;Fkbp15;PTN000434792;orthologs	FK506-BINDING PROTEIN 15 (PTHR44927:SF1)						actin binding(GO:0003779)	endocytosis(GO:0006897)	cytoplasm(GO:0005737);endosome(GO:0005768);actin cytoskeleton(GO:0015629);membrane(GO:0016020);axon(GO:0030424);growth cone(GO:0030426);cell projection(GO:0042995)						Mus musculus
MOUSE|MGI=MGI=1921442|UniProtKB=Q9D898	Q9D898	Actin-related protein 2_3 complex subunit 5-like protein;Arpc5l;PTN000291183;orthologs	ACTIN-RELATED PROTEIN 2_3 COMPLEX SUBUNIT 5-LIKE PROTEIN (PTHR12644:SF2)	actin filament binding(GO:0051015)	Arp2/3 complex-mediated actin nucleation(GO:0034314);cell migration(GO:0016477)	cytoplasm(GO:0005737);Arp2/3 protein complex(GO:0005885)	actin or actin-binding cytoskeletal protein(PC00041)	Inflammation mediated by chemokine and cytokine signaling pathway->Actin related protein 2/3 complex;;Integrin signalling pathway->Actin related protein 2/3 complex;;Huntington disease->Actin related protein 2/3 complex;;;;	actin binding(GO:0003779);actin filament binding(GO:0051015)	cell migration(GO:0016477);regulation of actin filament polymerization(GO:0030833);Arp2/3 complex-mediated actin nucleation(GO:0034314)	cytoplasm(GO:0005737);cytoskeleton(GO:0005856);Arp2/3 protein complex(GO:0005885);actin cytoskeleton(GO:0015629);synapse(GO:0045202);glutamatergic synapse(GO:0098978)						Mus musculus
MOUSE|MGI=MGI=1349438|UniProtKB=P97434	P97434	Myosin phosphatase Rho-interacting protein;Mprip;PTN000425543;orthologs	MYOSIN PHOSPHATASE RHO-INTERACTING PROTEIN (PTHR17271:SF9)	actin filament binding(GO:0051015)		actin cytoskeleton(GO:0015629)	actin or actin-binding cytoskeletal protein(PC00041)		actin binding(GO:0003779);actin filament binding(GO:0051015)	positive regulation of protein phosphorylation(GO:0001934);maintenance of protein location in cell(GO:0032507)	stress fiber(GO:0001725);cytoplasm(GO:0005737);cytosol(GO:0005829);cytoskeleton(GO:0005856);actin cytoskeleton(GO:0015629)						Mus musculus
MOUSE|MGI=MGI=1337100|UniProtKB=O88342	O88342	WD repeat-containing protein 1;Wdr1;PTN000458127;orthologs	WD REPEAT-CONTAINING PROTEIN 1 (PTHR19856:SF0)	actin filament binding(GO:0051015)	actin filament depolymerization(GO:0030042)	cortical actin cytoskeleton(GO:0030864)	non-motor actin binding protein(PC00165)		actin binding(GO:0003779);actin filament binding(GO:0051015)	neutrophil mediated immunity(GO:0002446);sensory perception of sound(GO:0007605);regulation of cell shape(GO:0008360);actin cytoskeleton organization(GO:0030036);actin filament depolymerization(GO:0030042);actin filament fragmentation(GO:0030043);platelet formation(GO:0030220);regulation of actin filament depolymerization(GO:0030834);positive regulation of actin filament depolymerization(GO:00308…	cytoplasm(GO:0005737);cytoskeleton(GO:0005856);plasma membrane(GO:0005886);cell-cell junction(GO:0005911);actin cytoskeleton(GO:0015629);cell junction(GO:0030054);cortical actin cytoskeleton(GO:0030864);cell projection(GO:0042995);myelin sheath(GO:0043209);anchoring junction(GO:0070161)	Response to elevated platelet cytosolic Ca2+;Hemostasis;Platelet activation, signaling and aggregation;Platelet degranulation					Mus musculus
MOUSE|MGI=MGI=1929270|UniProtKB=Q9R0P5	Q9R0P5	Destrin;Dstn;PTN000227278;orthologs	DESTRIN (PTHR11913:SF18)	actin filament binding(GO:0051015)	actin filament depolymerization(GO:0030042)	actin cortical patch(GO:0030479)	non-motor actin binding protein(PC00165)		actin binding(GO:0003779);actin filament binding(GO:0051015)	cytokinesis(GO:0000910);actin filament depolymerization(GO:0030042);actin filament fragmentation(GO:0030043);positive regulation of actin filament depolymerization(GO:0030836);cell motility(GO:0048870);actin filament severing(GO:0051014)	cytoplasm(GO:0005737);actin cytoskeleton(GO:0015629);cortical actin cytoskeleton(GO:0030864)						Mus musculus
MOUSE|MGI=MGI=1345966|UniProtKB=Q8C0P5	Q8C0P5	Coronin-2A;Coro2a;PTN000091765;orthologs	CORONIN-2A (PTHR10856:SF2)	actin filament binding(GO:0051015)	actin filament organization(GO:0007015)		non-motor actin binding protein(PC00165)		actin binding(GO:0003779);actin filament binding(GO:0051015)		brush border(GO:0005903);transcription repressor complex(GO:0017053)						Mus musculus
MOUSE|MGI=MGI=1925017|UniProtKB=Q5EBJ4	Q5EBJ4	Ermin;Ermn;PTN000589950;orthologs	ERMIN (PTHR47137:SF1)	actin filament binding(GO:0051015)	regulation of cell shape(GO:0008360);morphogenesis of a branching structure(GO:0001763);actin filament organization(GO:0007015);regulation of cell projection organization(GO:0031344)	extracellular space(GO:0005615);cell cortex(GO:0005938);filopodium(GO:0030175);vesicle(GO:0031982);neuronal cell body(GO:0043025);main axon(GO:0044304)			actin binding(GO:0003779);actin filament binding(GO:0051015)	morphogenesis of a branching structure(GO:0001763);actin filament organization(GO:0007015);regulation of cell shape(GO:0008360);regulation of cell projection organization(GO:0031344)	cytoplasm(GO:0005737);cytoskeleton(GO:0005856);cell cortex(GO:0005938);filopodium(GO:0030175);internode region of axon(GO:0033269);paranode region of axon(GO:0033270);neuronal cell body(GO:0043025);myelin sheath(GO:0043209);glial cell projection(GO:0097386)						Mus musculus
MOUSE|MGI=MGI=1890380|UniProtKB=Q8VCX6	Q8VCX6	KICSTOR complex protein kaptin;Kptn;PTN000396376;orthologs	KICSTOR COMPLEX PROTEIN KAPTIN (PTHR15435:SF2)	actin filament binding(GO:0051015)	negative regulation of TORC1 signaling(GO:1904262);cellular response to amino acid starvation(GO:0034198)	protein-containing complex(GO:0032991);lamellipodium(GO:0030027)			actin binding(GO:0003779);actin filament binding(GO:0051015)	actin filament organization(GO:0007015);cellular response to amino acid starvation(GO:0034198);cellular response to glucose starvation(GO:0042149);protein localization to lysosome(GO:0061462);negative regulation of TORC1 signaling(GO:1904262)	lysosome(GO:0005764);actin cytoskeleton(GO:0015629);membrane(GO:0016020);lamellipodium(GO:0030027);filamentous actin(GO:0031941);cell projection(GO:0042995);postsynaptic actin cytoskeleton(GO:0098871);KICSTOR complex(GO:0140007)	Cellular response to starvation;Amino acids regulate mTORC1;Cellular responses to stimuli;Cellular responses to stress					Mus musculus
MOUSE|MGI=MGI=2677850|UniProtKB=Q80ZQ9	Q80ZQ9	Protein Abitram;Abitram;PTN000342130;orthologs	PROTEIN ABITRAM (PTHR13651:SF0)						actin binding(GO:0003779);actin monomer binding(GO:0003785);actin filament binding(GO:0051015)	regulation of actin filament polymerization(GO:0030833);dendrite morphogenesis(GO:0048813);regulation of filopodium assembly(GO:0051489)	nucleus(GO:0005634);nuclear speck(GO:0016607);lamellipodium(GO:0030027);dendrite(GO:0030425);growth cone(GO:0030426);filopodium tip(GO:0032433);cell projection(GO:0042995)						Mus musculus
MOUSE|MGI=MGI=1345961|UniProtKB=O89053	O89053	Coronin-1A;Coro1a;PTN000091850;orthologs	CORONIN-1A (PTHR10856:SF18)	actin filament binding(GO:0051015)	actin filament organization(GO:0007015);cell migration(GO:0016477)		non-motor actin binding protein(PC00165)		actin binding(GO:0003779);actin monomer binding(GO:0003785);protein binding(GO:0005515);cytoskeletal protein binding(GO:0008092);myosin heavy chain binding(GO:0032036);identical protein binding(GO:0042802);protein homodimerization activity(GO:0042803);phosphatidylinositol 3-kinase binding(GO:0043548);actin filament binding(GO:0051015)	phagolysosome assembly(GO:0001845);calcium ion transport(GO:0006816);vesicle fusion(GO:0006906);phagocytosis(GO:0006909);actin filament organization(GO:0007015);regulation of actin polymerization or depolymerization(GO:0008064);regulation of cell shape(GO:0008360);epithelial cell migration(GO:0010631);cell migration(GO:0016477);actin cytoskeleton organization(GO:0030036);leukocyte chemotaxis(GO:0…	immunological synapse(GO:0001772);phagocytic cup(GO:0001891);cytoplasm(GO:0005737);early endosome(GO:0005769);cytoskeleton(GO:0005856);actin filament(GO:0005884);plasma membrane(GO:0005886);cell-cell junction(GO:0005911);actin cytoskeleton(GO:0015629);membrane(GO:0016020);lamellipodium(GO:0030027);axon(GO:0030424);cortical actin cytoskeleton(GO:0030864);cell leading edge(GO:0031252);cytoplasmic v…						Mus musculus
MOUSE|MGI=MGI=99510|UniProtKB=P20065	P20065	Thymosin beta-4;Tmsb4x;PTN000246223;orthologs	THYMOSIN BETA-4 (PTHR12021:SF20)	actin monomer binding(GO:0003785)	maintenance of location in cell(GO:0051651);negative regulation of actin filament polymerization(GO:0030837);protein localization(GO:0008104);regulation of cell migration(GO:0030334)	cytoplasm(GO:0005737)	actin or actin-binding cytoskeletal protein(PC00041)		actin binding(GO:0003779);actin monomer binding(GO:0003785);protein binding(GO:0005515);enzyme binding(GO:0019899);protein sequestering activity(GO:0140311)	actin filament organization(GO:0007015);positive regulation of smooth muscle cell migration(GO:0014911);regulation of cell migration(GO:0030334);sequestering of actin monomers(GO:0042989);positive regulation of DNA-templated transcription(GO:0045893);positive regulation of smooth muscle cell differentiation(GO:0051152)	nucleus(GO:0005634);cytoplasm(GO:0005737);cytosol(GO:0005829);cytoskeleton(GO:0005856)	Response to elevated platelet cytosolic Ca2+;Hemostasis;Platelet activation, signaling and aggregation;Platelet degranulation					Mus musculus
MOUSE|MGI=MGI=1346078|UniProtKB=Q9Z0P5	Q9Z0P5	Twinfilin-2;Twf2;PTN000349073;orthologs	TWINFILIN-2 (PTHR13759:SF9)	actin filament binding(GO:0051015);actin monomer binding(GO:0003785)	barbed-end actin filament capping(GO:0051016);maintenance of location in cell(GO:0051651);actin filament depolymerization(GO:0030042);positive regulation of cellular component organization(GO:0051130);protein localization(GO:0008104);regulation of neuron projection development(GO:0010975);regulation of plasma membrane bounded cell projection assembly(GO:0120032)	actin filament(GO:0005884);myofibril(GO:0030016)	non-motor actin binding protein(PC00165)		actin binding(GO:0003779);actin monomer binding(GO:0003785);protein kinase C binding(GO:0005080);ATP binding(GO:0005524);phosphatidylinositol-4,5-bisphosphate binding(GO:0005546);actin filament binding(GO:0051015)	multicellular organism development(GO:0007275);regulation of lamellipodium assembly(GO:0010591);positive regulation of lamellipodium assembly(GO:0010592);positive regulation of neuron projection development(GO:0010976);cell projection organization(GO:0030030);actin filament depolymerization(GO:0030042);negative regulation of actin filament polymerization(GO:0030837);regulation of microvillus leng…	cytoplasm(GO:0005737);cytosol(GO:0005829);cytoskeleton(GO:0005856);actin filament(GO:0005884);myofibril(GO:0030016);lamellipodium(GO:0030027);filopodium(GO:0030175);growth cone(GO:0030426);stereocilium(GO:0032420);cell projection(GO:0042995);perinuclear region of cytoplasm(GO:0048471)						Mus musculus
MOUSE|MGI=MGI=1100520|UniProtKB=Q91YR1	Q91YR1	Twinfilin-1;Twf1;PTN000349098;orthologs	TWINFILIN-1 (PTHR13759:SF8)	actin filament binding(GO:0051015);actin monomer binding(GO:0003785)	barbed-end actin filament capping(GO:0051016);maintenance of location in cell(GO:0051651);actin filament depolymerization(GO:0030042);positive regulation of cellular component organization(GO:0051130);protein localization(GO:0008104);regulation of neuron projection development(GO:0010975);regulation of plasma membrane bounded cell projection assembly(GO:0120032)	actin filament(GO:0005884);myofibril(GO:0030016)	non-motor actin binding protein(PC00165)		actin binding(GO:0003779);actin monomer binding(GO:0003785);protein tyrosine kinase activity(GO:0004713);protein binding(GO:0005515);ATP binding(GO:0005524);phosphatidylinositol-4,5-bisphosphate binding(GO:0005546);protein-containing complex binding(GO:0044877);actin filament binding(GO:0051015)	regulation of lamellipodium assembly(GO:0010591);positive regulation of cardiac muscle hypertrophy(GO:0010613);positive regulation of neuron projection development(GO:0010976);actin filament depolymerization(GO:0030042);negative regulation of actin filament polymerization(GO:0030837);sequestering of actin monomers(GO:0042989);regulation of actin phosphorylation(GO:0043538);barbed-end actin filame…	cytoplasm(GO:0005737);cytosol(GO:0005829);cytoskeleton(GO:0005856);actin filament(GO:0005884);cell-cell junction(GO:0005911);actin cytoskeleton(GO:0015629);myofibril(GO:0030016);filopodium(GO:0030175);ruffle membrane(GO:0032587);perinuclear region of cytoplasm(GO:0048471)	RHO GTPase cycle;RHOBTB2 GTPase cycle;RHOBTB GTPase Cycle;Signaling by Rho GTPases, Miro GTPases and RHOBTB3;Signal Transduction;Signaling by Rho GTPases					Mus musculus
MOUSE|MGI=MGI=1914502|UniProtKB=Q9CYT6	Q9CYT6	Adenylyl cyclase-associated protein 2;Cap2;PTN000068890;orthologs	ADENYLYL CYCLASE-ASSOCIATED PROTEIN 2 (PTHR10652:SF2)	actin binding(GO:0003779);enzyme binding(GO:0019899)	cell morphogenesis(GO:0000902);actin filament organization(GO:0007015);cAMP-mediated signaling(GO:0019933)	cytoplasm(GO:0005737)	actin or actin-binding cytoskeletal protein(PC00041)		actin binding(GO:0003779);adenylate cyclase binding(GO:0008179);identical protein binding(GO:0042802)	cell morphogenesis(GO:0000902);cytoskeleton organization(GO:0007010);actin filament organization(GO:0007015);cAMP-mediated signaling(GO:0019933);presynaptic actin cytoskeleton organization(GO:0099140)	cytoplasm(GO:0005737);plasma membrane(GO:0005886);postsynaptic density(GO:0014069);membrane(GO:0016020)						Mus musculus
MOUSE|MGI=MGI=1919598|UniProtKB=Q9EQX4	Q9EQX4	Allograft inflammatory factor 1-like;Aif1l;PTN000039813;orthologs	ALLOGRAFT INFLAMMATORY FACTOR 1-LIKE (PTHR10356:SF5)	actin filament binding(GO:0051015);calcium ion binding(GO:0005509)	plasma membrane bounded cell projection assembly(GO:0120031);actin filament bundle assembly(GO:0051017)	ruffle membrane(GO:0032587);actin filament(GO:0005884)	calmodulin-related(PC00061)		actin binding(GO:0003779);calcium ion binding(GO:0005509);metal ion binding(GO:0046872);actin filament binding(GO:0051015)	actin filament bundle assembly(GO:0051017);ruffle assembly(GO:0097178)	cytoplasm(GO:0005737);cytoskeleton(GO:0005856);actin filament(GO:0005884);plasma membrane(GO:0005886);focal adhesion(GO:0005925);actin cytoskeleton(GO:0015629);membrane(GO:0016020);ruffle membrane(GO:0032587);protein-containing complex(GO:0032991);cell projection(GO:0042995)						Mus musculus
MOUSE|MGI=MGI=104807|UniProtKB=Q99K51	Q99K51	Plastin-3;Pls3;PTN000462526;orthologs	PLASTIN-3 (PTHR19961:SF32)	actin filament binding(GO:0051015)	actin filament bundle assembly(GO:0051017)	cytoplasm(GO:0005737);actin filament bundle(GO:0032432);actin filament(GO:0005884)	non-motor actin binding protein(PC00165)		actin binding(GO:0003779);calcium ion binding(GO:0005509);metal ion binding(GO:0046872);actin filament binding(GO:0051015);structural constituent of presynaptic actin cytoskeleton(GO:0098699)	actin filament bundle assembly(GO:0051017);actin filament network formation(GO:0051639);bone development(GO:0060348);regulation of synaptic vesicle cycle(GO:0098693)	cytoplasm(GO:0005737);cytosol(GO:0005829);actin filament(GO:0005884);plasma membrane(GO:0005886);neuromuscular junction(GO:0031594);stereocilium(GO:0032420);actin filament bundle(GO:0032432)						Mus musculus
MOUSE|MGI=MGI=98386|UniProtKB=P16546	P16546	Spectrin alpha chain, non-erythrocytic 1;Sptan1;PTN000747267;orthologs	SPECTRIN ALPHA CHAIN, NON-ERYTHROCYTIC 1 (PTHR11915:SF427)	actin filament binding(GO:0051015)	actin cytoskeleton organization(GO:0030036)	cell junction(GO:0030054);cell projection(GO:0042995);cortical actin cytoskeleton(GO:0030864);plasma membrane(GO:0005886)	actin or actin-binding cytoskeletal protein(PC00041)		actin binding(GO:0003779);calcium ion binding(GO:0005509);protein binding(GO:0005515);calmodulin binding(GO:0005516);spectrin binding(GO:0030507);protein-containing complex binding(GO:0044877);metal ion binding(GO:0046872);actin filament binding(GO:0051015)	actin cytoskeleton organization(GO:0030036);actin filament capping(GO:0051693)	cytoplasm(GO:0005737);cytosol(GO:0005829);cytoskeleton(GO:0005856);plasma membrane(GO:0005886);fascia adherens(GO:0005916);microtubule cytoskeleton(GO:0015630);membrane(GO:0016020);lateral plasma membrane(GO:0016328);Z disc(GO:0030018);cell junction(GO:0030054);cortical cytoskeleton(GO:0030863);cortical actin cytoskeleton(GO:0030864);cuticular plate(GO:0032437);protein-containing complex(GO:00329…	RHOU GTPase cycle;MAPK family signaling cascades;Apoptotic execution phase;Innate Immune System;Metabolism of proteins;Caspase-mediated cleavage of cytoskeletal proteins;Developmental Biology;Transport to the Golgi and subsequent modification;Programmed Cell Death;Nervous system development;Axon guidance;Signal Transduction;Interaction between L1 and Ankyrins;COPI-mediated anterograde transport;I…					Mus musculus
MOUSE|MGI=MGI=1330282|UniProtKB=P07091	P07091	Protein S100-A4;S100a4;PTN000181528;orthologs	PROTEIN S100-A4 (PTHR11639:SF51)	protein binding(GO:0005515);calcium ion binding(GO:0005509)			calmodulin-related(PC00061)		actin binding(GO:0003779);calcium ion binding(GO:0005509);protein binding(GO:0005515);chemoattractant activity(GO:0042056);identical protein binding(GO:0042802);metal ion binding(GO:0046872);transition metal ion binding(GO:0046914);calcium-dependent protein binding(GO:0048306);RAGE receptor binding(GO:0050786)	positive regulation of canonical NF-kappaB signal transduction(GO:0043123)	extracellular region(GO:0005576);extracellular space(GO:0005615);nucleus(GO:0005634);nucleoplasm(GO:0005654);cytoplasm(GO:0005737);cytosol(GO:0005829);perinuclear region of cytoplasm(GO:0048471)						Mus musculus
MOUSE|MGI=MGI=1336200|UniProtKB=P84075	P84075	Neuron-specific calcium-binding protein hippocalcin;Hpca;PTN000551047;orthologs	NEURON-SPECIFIC CALCIUM-BINDING PROTEIN HIPPOCALCIN (PTHR23055:SF57)	calcium ion binding(GO:0005509)			calmodulin-related(PC00061)		actin binding(GO:0003779);calcium ion binding(GO:0005509);protein binding(GO:0005515);kinase binding(GO:0019900);identical protein binding(GO:0042802);metal ion binding(GO:0046872)	inner ear development(GO:0048839);cellular response to calcium ion(GO:0071277);positive regulation of protein targeting to membrane(GO:0090314);regulation of postsynaptic neurotransmitter receptor internalization(GO:0099149);regulation of voltage-gated calcium channel activity(GO:1901385);cellular response to L-glutamate(GO:1905232)	cytoplasm(GO:0005737);cytosol(GO:0005829);membrane(GO:0016020);axon(GO:0030424);dendrite membrane(GO:0032590);neuronal cell body membrane(GO:0032809);dendrite cytoplasm(GO:0032839);perikaryon(GO:0043204);dendritic spine head(GO:0044327);postsynapse(GO:0098794);glutamatergic synapse(GO:0098978)						Mus musculus
MOUSE|MGI=MGI=109192|UniProtKB=Q9JI91	Q9JI91	Alpha-actinin-2;Actn2;PTN000747552;orthologs	ALPHA-ACTININ-2 (PTHR11915:SF429)	actin filament binding(GO:0051015)	muscle cell development(GO:0055001);actin cytoskeleton organization(GO:0030036)	Z disc(GO:0030018);cell junction(GO:0030054);cell projection(GO:0042995);cortical actin cytoskeleton(GO:0030864);plasma membrane(GO:0005886)	actin or actin-binding cytoskeletal protein(PC00041)	Integrin signalling pathway->alpha actinin;;	actin binding(GO:0003779);calcium ion binding(GO:0005509);protein binding(GO:0005515);phosphatidylinositol-4,5-bisphosphate binding(GO:0005546);cytoskeletal protein binding(GO:0008092);protein domain specific binding(GO:0019904);LIM domain binding(GO:0030274);nuclear receptor coactivator activity(GO:0030374);protein-macromolecule adaptor activity(GO:0030674);titin binding(GO:0031432);identical pr…	muscle contraction(GO:0006936);microspike assembly(GO:0030035);actin cytoskeleton organization(GO:0030036);regulation of membrane potential(GO:0042391);negative regulation of potassium ion transport(GO:0043267);positive regulation of potassium ion transport(GO:0043268);sarcomere organization(GO:0045214);focal adhesion assembly(GO:0048041);actin filament uncapping(GO:0051695);muscle cell developme…	cytoplasm(GO:0005737);striated muscle thin filament(GO:0005865);plasma membrane(GO:0005886);focal adhesion(GO:0005925);sarcomere(GO:0030017);Z disc(GO:0030018);cell junction(GO:0030054);filopodium(GO:0030175);cortical actin cytoskeleton(GO:0030864);cell projection(GO:0042995);postsynaptic density membrane(GO:0098839);postsynaptic actin cytoskeleton(GO:0098871);glutamatergic synapse(GO:0098978);po…	RAF/MAP kinase cascade;Neuronal System;Muscle contraction;Transmission across Chemical Synapses;MAPK1/MAPK3 signaling;Neurotransmitter receptors and postsynaptic signal transmission;Activation of NMDA receptors and postsynaptic events;Platelet degranulation ;Hemostasis;Response to elevated platelet cytosolic Ca2+;Striated Muscle Contraction;MAPK family signaling cascades;Signal Transduction;Plate…					Mus musculus
MOUSE|MGI=MGI=95851|UniProtKB=P13020	P13020	Gelsolin;Gsn;PTN000240182;orthologs	GELSOLIN (PTHR11977:SF29)	actin filament binding(GO:0051015);phosphatidylinositol-4,5-bisphosphate binding(GO:0005546)	barbed-end actin filament capping(GO:0051016);central nervous system development(GO:0007417);actin polymerization or depolymerization(GO:0008154);cell projection assembly(GO:0030031)	extracellular space(GO:0005615);cytoplasm(GO:0005737);actin cytoskeleton(GO:0015629)	non-motor actin binding protein(PC00165)	FAS signaling pathway->Gelsolin;;	actin binding(GO:0003779);calcium ion binding(GO:0005509);protein binding(GO:0005515);phosphatidylinositol-4,5-bisphosphate binding(GO:0005546);phosphatidylinositol 3-kinase catalytic subunit binding(GO:0036313);myosin II binding(GO:0045159);metal ion binding(GO:0046872);actin filament binding(GO:0051015)	phagocytosis, engulfment(GO:0006911);actin filament organization(GO:0007015);central nervous system development(GO:0007417);actin polymerization or depolymerization(GO:0008154);positive regulation of cardiac muscle hypertrophy(GO:0010613);positive regulation of gene expression(GO:0010628);striated muscle atrophy(GO:0014891);vesicle-mediated transport(GO:0016192);cell projection organization(GO:00…	ruffle(GO:0001726);podosome(GO:0002102);extracellular region(GO:0005576);extracellular space(GO:0005615);nucleus(GO:0005634);cytoplasm(GO:0005737);cytosol(GO:0005829);cytoskeleton(GO:0005856);plasma membrane(GO:0005886);focal adhesion(GO:0005925);actin cytoskeleton(GO:0015629);sarcoplasm(GO:0016528);lamellipodium(GO:0030027);actin cap(GO:0030478);cortical actin cytoskeleton(GO:0030864);protein-co…	Apoptotic execution phase;Immune System;Apoptosis;Innate Immune System;Neutrophil degranulation;Caspase-mediated cleavage of cytoskeletal proteins;Apoptotic cleavage of cellular proteins;Programmed Cell Death					Mus musculus
MOUSE|MGI=MGI=99678|UniProtKB=O88990	O88990	Alpha-actinin-3;Actn3;PTN000747572;orthologs	ALPHA-ACTININ-3 (PTHR11915:SF432)	actin filament binding(GO:0051015)	muscle cell development(GO:0055001);actin cytoskeleton organization(GO:0030036)	Z disc(GO:0030018);cell junction(GO:0030054);cell projection(GO:0042995);cortical actin cytoskeleton(GO:0030864);plasma membrane(GO:0005886)	actin or actin-binding cytoskeletal protein(PC00041)	Integrin signalling pathway->alpha actinin;;	actin binding(GO:0003779);calcium ion binding(GO:0005509);protein binding(GO:0005515);protein-macromolecule adaptor activity(GO:0030674);identical protein binding(GO:0042802);transmembrane transporter binding(GO:0044325);metal ion binding(GO:0046872);actin filament binding(GO:0051015)	muscle contraction(GO:0006936);regulation of the force of skeletal muscle contraction(GO:0014728);skeletal muscle atrophy(GO:0014732);transition between fast and slow fiber(GO:0014883);response to denervation involved in regulation of muscle adaptation(GO:0014894);actin cytoskeleton organization(GO:0030036);positive regulation of fast-twitch skeletal muscle fiber contraction(GO:0031448);negative …	striated muscle thin filament(GO:0005865);plasma membrane(GO:0005886);brush border(GO:0005903);focal adhesion(GO:0005925);sarcomere(GO:0030017);Z disc(GO:0030018);cell junction(GO:0030054);cortical actin cytoskeleton(GO:0030864);cell projection(GO:0042995)	Muscle contraction;Striated Muscle Contraction					Mus musculus
MOUSE|MGI=MGI=105093|UniProtKB=Q08093	Q08093	Calponin-2;Cnn2;PTN000437551;orthologs	CALPONIN-2 (PTHR47385:SF7)	actin filament binding(GO:0051015)	actin filament organization(GO:0007015)	focal adhesion(GO:0005925);actin cytoskeleton(GO:0015629)			actin binding(GO:0003779);calmodulin binding(GO:0005516);actin filament binding(GO:0051015)	phagocytosis(GO:0006909);actin filament organization(GO:0007015);positive regulation of gene expression(GO:0010628);hemopoiesis(GO:0030097);actomyosin structure organization(GO:0031032);regulation of mononuclear cell proliferation(GO:0032944);regulation of actin filament-based process(GO:0032970);wound healing(GO:0042060);negative regulation of phagocytosis(GO:0050765);establishment of localizati…	stress fiber(GO:0001725);actin cytoskeleton(GO:0015629)	Immune System;Innate Immune System;Neutrophil degranulation					Mus musculus
MOUSE|MGI=MGI=95557|UniProtKB=Q8VHX6	Q8VHX6	Filamin-C;Flnc;PTN000747359;orthologs	FILAMIN-C (PTHR38537:SF12)						actin binding(GO:0003779);cytoskeletal protein binding(GO:0008092);ankyrin binding(GO:0030506);identical protein binding(GO:0042802);actin filament binding(GO:0051015)	actin filament-based process(GO:0030029);actin cytoskeleton organization(GO:0030036);sarcomere organization(GO:0045214);muscle cell development(GO:0055001)	cytoplasm(GO:0005737);cytosol(GO:0005829);cytoskeleton(GO:0005856);plasma membrane(GO:0005886);actin cytoskeleton(GO:0015629);membrane(GO:0016020);sarcoplasm(GO:0016528);sarcolemma(GO:0042383);intercellular bridge(GO:0045171)	Cell-Cell communication;Cell-extracellular matrix interactions;Cell junction organization					Mus musculus
MOUSE|MGI=MGI=107182|UniProtKB=P51682	P51682	C-C chemokine receptor type 5;Ccr5;PTN000659282;orthologs	C-C CHEMOKINE RECEPTOR TYPE 5 (PTHR10489:SF686)	C-C chemokine binding(GO:0019957);G protein-coupled receptor activity(GO:0004930);cytokine receptor activity(GO:0004896)	immune response(GO:0006955);calcium-mediated signaling(GO:0019722);cell chemotaxis(GO:0060326);positive regulation of cytosolic calcium ion concentration(GO:0007204)	external side of plasma membrane(GO:0009897)	cell adhesion molecule(PC00069)	Inflammation mediated by chemokine and cytokine signaling pathway->Chemokine receptor;;	actin binding(GO:0003779);G protein-coupled receptor activity(GO:0004930);chemokine receptor activity(GO:0004950);C-C chemokine receptor activity(GO:0016493);protein kinase binding(GO:0019901);C-C chemokine binding(GO:0019957);identical protein binding(GO:0042802);chemokine (C-C motif) ligand 5 binding(GO:0071791)	calcium ion transport(GO:0006816);chemotaxis(GO:0006935);defense response(GO:0006952);inflammatory response(GO:0006954);immune response(GO:0006955);signal transduction(GO:0007165);G protein-coupled receptor signaling pathway(GO:0007186);positive regulation of cytosolic calcium ion concentration(GO:0007204);cell-cell signaling(GO:0007267);positive regulation of gene expression(GO:0010628);release …	cytoplasm(GO:0005737);endosome(GO:0005768);plasma membrane(GO:0005886);external side of plasma membrane(GO:0009897);cell surface(GO:0009986);membrane(GO:0016020)	GPCR downstream signalling;Chemokine receptors bind chemokines;Signaling by GPCR;Signal Transduction;Peptide ligand-binding receptors;Class A/1 (Rhodopsin-like receptors);GPCR ligand binding;G alpha (i) signalling events					Mus musculus
MOUSE|MGI=MGI=1927133|UniProtKB=Q9CQI3	Q9CQI3	Glia maturation factor beta;Gmfb;PTN000134134;orthologs	GLIA MATURATION FACTOR BETA (PTHR11249:SF3)	protein-containing complex binding(GO:0044877)	actin filament-based process(GO:0030029);negative regulation of supramolecular fiber organization(GO:1902904);negative regulation of cytoskeleton organization(GO:0051494);regulation of actin filament organization(GO:0110053)	actin cortical patch(GO:0030479)	intercellular signal molecule(PC00207)		actin binding(GO:0003779);growth factor activity(GO:0008083);Arp2/3 complex binding(GO:0071933)	learning(GO:0007612);locomotory behavior(GO:0007626);negative regulation of Arp2/3 complex-mediated actin nucleation(GO:0034316);actin filament debranching(GO:0071846)							Mus musculus
MOUSE|MGI=MGI=1927135|UniProtKB=Q9ERL7	Q9ERL7	Glia maturation factor gamma;Gmfg;PTN000134119;orthologs	GLIA MATURATION FACTOR GAMMA (PTHR11249:SF4)	protein-containing complex binding(GO:0044877)	actin filament-based process(GO:0030029);negative regulation of supramolecular fiber organization(GO:1902904);negative regulation of cytoskeleton organization(GO:0051494);regulation of actin filament organization(GO:0110053)	actin cortical patch(GO:0030479)	intercellular signal molecule(PC00207)		actin binding(GO:0003779);growth factor activity(GO:0008083);Arp2/3 complex binding(GO:0071933)	negative regulation of Arp2/3 complex-mediated actin nucleation(GO:0034316);actin filament debranching(GO:0071846)		Immune System;Innate Immune System;Neutrophil degranulation					Mus musculus
MOUSE|MGI=MGI=1926252|UniProtKB=Q9Z0G0	Q9Z0G0	PDZ domain-containing protein GIPC1;Gipc1;PTN000262473;orthologs	PDZ DOMAIN-CONTAINING PROTEIN GIPC1 (PTHR12259:SF4)				scaffold/adaptor protein(PC00226)		actin binding(GO:0003779);GTPase activator activity(GO:0005096);signaling receptor binding(GO:0005102);protein binding(GO:0005515);myosin binding(GO:0017022);PDZ domain binding(GO:0030165);identical protein binding(GO:0042802)	protein targeting(GO:0006605);G protein-coupled receptor signaling pathway(GO:0007186);chemical synaptic transmission(GO:0007268);glutamate secretion(GO:0014047);positive regulation of transforming growth factor beta receptor signaling pathway(GO:0030511);regulation of protein stability(GO:0031647);negative regulation of proteasomal ubiquitin-dependent protein catabolic process(GO:0032435);positi…	cytoplasm(GO:0005737);cytosol(GO:0005829);brush border(GO:0005903);cell cortex(GO:0005938);synaptic vesicle(GO:0008021);vesicle membrane(GO:0012506);membrane(GO:0016020);endocytic vesicle(GO:0030139);cytoplasmic vesicle(GO:0031410);dendritic spine(GO:0043197);dendritic shaft(GO:0043198);Schaffer collateral - CA1 synapse(GO:0098685);presynapse(GO:0098793);postsynapse(GO:0098794);glutamatergic syna…						Mus musculus
MOUSE|MGI=MGI=2449202|UniProtKB=Q6IRU2	Q6IRU2	Tropomyosin alpha-4 chain;Tpm4;PTN000443998;orthologs	TROPOMYOSIN ALPHA-4 CHAIN (PTHR19269:SF70)	actin filament binding(GO:0051015)	muscle contraction(GO:0006936);actin filament organization(GO:0007015)	actin filament(GO:0005884)	actin binding motor protein(PC00040)		actin binding(GO:0003779);identical protein binding(GO:0042802);protein homodimerization activity(GO:0042803);metal ion binding(GO:0046872);protein heterodimerization activity(GO:0046982);actin filament binding(GO:0051015)	muscle contraction(GO:0006936);actin filament organization(GO:0007015)	stress fiber(GO:0001725);podosome(GO:0002102);cytoplasm(GO:0005737);cytoskeleton(GO:0005856);actin filament(GO:0005884);actin cytoskeleton(GO:0015629);cortical cytoskeleton(GO:0030863)	Muscle contraction;RHO GTPase cycle;Smooth Muscle Contraction;Striated Muscle Contraction;Signaling by Rho GTPases, Miro GTPases and RHOBTB3;Signal Transduction;RHOV GTPase cycle;Signaling by Rho GTPases					Mus musculus
MOUSE|MGI=MGI=104808|UniProtKB=Q61233	Q61233	Plastin-2;Lcp1;PTN000462473;orthologs	PLASTIN-2 (PTHR19961:SF35)	actin filament binding(GO:0051015)	actin filament bundle assembly(GO:0051017)	cytoplasm(GO:0005737);actin filament bundle(GO:0032432);actin filament(GO:0005884)	non-motor actin binding protein(PC00165)		actin binding(GO:0003779);integrin binding(GO:0005178);calcium ion binding(GO:0005509);protein binding(GO:0005515);identical protein binding(GO:0042802);metal ion binding(GO:0046872);actin filament binding(GO:0051015);GTPase binding(GO:0051020)	T cell activation involved in immune response(GO:0002286);response to wounding(GO:0009611);protein kinase A signaling(GO:0010737);cell migration(GO:0016477);extracellular matrix disassembly(GO:0022617);regulation of intracellular protein transport(GO:0033157);actin filament bundle assembly(GO:0051017);actin filament network formation(GO:0051639);positive regulation of podosome assembly(GO:0071803)	stress fiber(GO:0001725);ruffle(GO:0001726);phagocytic cup(GO:0001891);podosome(GO:0002102);cytoplasm(GO:0005737);cytosol(GO:0005829);cytoskeleton(GO:0005856);actin filament(GO:0005884);plasma membrane(GO:0005886);focal adhesion(GO:0005925);actin cytoskeleton(GO:0015629);membrane(GO:0016020);filopodium(GO:0030175);actin filament bundle(GO:0032432);cell projection(GO:0042995);perinuclear region of…						Mus musculus
MOUSE|MGI=MGI=1917799|UniProtKB=Q71LX4	Q71LX4	Talin-2;Tln2;PTN000463466;orthologs	TALIN-2 (PTHR19981:SF34)	integrin binding(GO:0005178)	cell-cell adhesion(GO:0098609)	focal adhesion(GO:0005925);plasma membrane(GO:0005886)			actin binding(GO:0003779);integrin binding(GO:0005178);structural constituent of cytoskeleton(GO:0005200);protein binding(GO:0005515);actin filament binding(GO:0051015)	cell adhesion(GO:0007155);cell-cell adhesion(GO:0098609)	ruffle(GO:0001726);cytoplasm(GO:0005737);cytoskeleton(GO:0005856);plasma membrane(GO:0005886);fascia adherens(GO:0005916);focal adhesion(GO:0005925);membrane(GO:0016020);synapse(GO:0045202);anchoring junction(GO:0070161)						Mus musculus
MOUSE|MGI=MGI=99923|UniProtKB=Q08460	Q08460	Calcium-activated potassium channel subunit alpha-1;Kcnma1;PTN000002903;orthologs	CALCIUM-ACTIVATED POTASSIUM CHANNEL SUBUNIT ALPHA-1 (PTHR10027:SF28)	calcium-activated potassium channel activity(GO:0015269)	potassium ion transmembrane transport(GO:0071805)	postsynaptic membrane(GO:0045211)	ion channel(PC00133)		actin binding(GO:0003779);monoatomic ion channel activity(GO:0005216);voltage-gated potassium channel activity(GO:0005249);potassium channel activity(GO:0005267);protein binding(GO:0005515);calcium-activated potassium channel activity(GO:0015269);identical protein binding(GO:0042802);protein-containing complex binding(GO:0044877);metal ion binding(GO:0046872);large conductance calcium-activated p…	response to hypoxia(GO:0001666);columnar/cuboidal epithelial cell maturation(GO:0002069);monoatomic ion transport(GO:0006811);potassium ion transport(GO:0006813);response to osmotic stress(GO:0006970);chemical synaptic transmission(GO:0007268);sensory perception of sound(GO:0007605);circadian rhythm(GO:0007623);adult walking behavior(GO:0007628);response to pH(GO:0009268);neuronal action potentia…	endoplasmic reticulum(GO:0005783);plasma membrane(GO:0005886);caveola(GO:0005901);voltage-gated potassium channel complex(GO:0008076);external side of plasma membrane(GO:0009897);membrane(GO:0016020);apical plasma membrane(GO:0016324);sarcoplasm(GO:0016528);dendrite(GO:0030425);protein-containing complex(GO:0032991);monoatomic ion channel complex(GO:0034702);neuronal cell body(GO:0043025);termina…	Ca2+ activated K+ channels;Potassium Channels;Neuronal System					Mus musculus
MOUSE|MGI=MGI=2385847|UniProtKB=Q8VDP3	Q8VDP3	[F-actin]-monooxygenase MICAL1;Mical1;PTN000747436;orthologs	[F-ACTIN]-MONOOXYGENASE MICAL1 (PTHR23167:SF35)				scaffold/adaptor protein(PC00226)		actin binding(GO:0003779);monooxygenase activity(GO:0004497);protein binding(GO:0005515);NAD(P)H oxidase H2O2-forming activity(GO:0016174);oxidoreductase activity(GO:0016491);oxidoreductase activity, acting on paired donors, with incorporation or reduction of molecular oxygen, NAD(P)H as one donor, and incorporation of one atom of oxygen(GO:0016709);SH3 domain binding(GO:0017124);protein kinase b…	negative regulation of protein phosphorylation(GO:0001933);sulfur oxidation(GO:0019417);actin filament depolymerization(GO:0030042);negative regulation of apoptotic process(GO:0043066);negative regulation of cysteine-type endopeptidase activity involved in apoptotic process(GO:0043154);regulation of regulated secretory pathway(GO:1903305)	cytoplasm(GO:0005737);endosome(GO:0005768);cytosol(GO:0005829);cytoskeleton(GO:0005856);actin filament(GO:0005884);endosome membrane(GO:0010008);membrane(GO:0016020);midbody(GO:0030496);intercellular bridge(GO:0045171);hippocampal mossy fiber expansion(GO:1990026)						Mus musculus
MOUSE|MGI=MGI=2147319|UniProtKB=Q8K4L3	Q8K4L3	Supervillin;Svil;PTN000240075;orthologs	SUPERVILLIN (PTHR11977:SF45)	actin filament binding(GO:0051015);phosphatidylinositol-4,5-bisphosphate binding(GO:0005546)	barbed-end actin filament capping(GO:0051016);actin polymerization or depolymerization(GO:0008154)	cytoplasm(GO:0005737);actin cytoskeleton(GO:0015629)	non-motor actin binding protein(PC00165)		actin binding(GO:0003779);phosphatidylinositol-4,5-bisphosphate binding(GO:0005546);actin filament binding(GO:0051015)	cytoskeleton organization(GO:0007010);skeletal muscle tissue development(GO:0007519);actin polymerization or depolymerization(GO:0008154);muscle cell differentiation(GO:0042692);actin filament severing(GO:0051014);barbed-end actin filament capping(GO:0051016)	nucleus(GO:0005634);nucleoplasm(GO:0005654);cytoplasm(GO:0005737);cytosol(GO:0005829);cytoskeleton(GO:0005856);plasma membrane(GO:0005886);focal adhesion(GO:0005925);actin cytoskeleton(GO:0015629);membrane(GO:0016020);sarcolemma(GO:0042383);cell projection(GO:0042995);costamere(GO:0043034);anchoring junction(GO:0070161);cell periphery(GO:0071944)						Mus musculus
MOUSE|MGI=MGI=1098259|UniProtKB=P24452	P24452	Macrophage-capping protein;Capg;PTN000240217;orthologs	MACROPHAGE-CAPPING PROTEIN (PTHR11977:SF127)	actin filament binding(GO:0051015);phosphatidylinositol-4,5-bisphosphate binding(GO:0005546)	barbed-end actin filament capping(GO:0051016);central nervous system development(GO:0007417);actin polymerization or depolymerization(GO:0008154);cell projection assembly(GO:0030031)	cytoplasm(GO:0005737);actin cytoskeleton(GO:0015629)	non-motor actin binding protein(PC00165)	FAS signaling pathway->Gelsolin;;	actin binding(GO:0003779);phosphatidylinositol-4,5-bisphosphate binding(GO:0005546);protein domain specific binding(GO:0019904);protein-containing complex binding(GO:0044877);actin filament binding(GO:0051015)	central nervous system development(GO:0007417);actin polymerization or depolymerization(GO:0008154);cell projection assembly(GO:0030031);actin filament severing(GO:0051014);barbed-end actin filament capping(GO:0051016);actin filament capping(GO:0051693);cellular response to type II interferon(GO:0071346)	nucleus(GO:0005634);nucleoplasm(GO:0005654);nucleolus(GO:0005730);cytoplasm(GO:0005737);centriole(GO:0005814);actin cytoskeleton(GO:0015629);cell projection(GO:0042995);phagocytic vesicle(GO:0045335);mitotic spindle(GO:0072686);Flemming body(GO:0090543)						Mus musculus
MOUSE|MGI=MGI=1914249|UniProtKB=Q920D3	Q920D3	Mediator of RNA polymerase II transcription subunit 28;Med28;PTN000337943;orthologs	MEDIATOR OF RNA POLYMERASE II TRANSCRIPTION SUBUNIT 28 (PTHR13512:SF2)			mediator complex(GO:0016592)	general transcription factor(PC00259)		actin binding(GO:0003779);protein binding(GO:0005515)	positive regulation of transcription elongation by RNA polymerase II(GO:0032968);somatic stem cell population maintenance(GO:0035019);RNA polymerase II preinitiation complex assembly(GO:0051123);negative regulation of smooth muscle cell differentiation(GO:0051151);positive regulation of transcription initiation by RNA polymerase II(GO:0060261)	nucleus(GO:0005634);nucleoplasm(GO:0005654);cytoplasm(GO:0005737);cytoskeleton(GO:0005856);membrane(GO:0016020);mediator complex(GO:0016592);cortical actin cytoskeleton(GO:0030864);core mediator complex(GO:0070847)						Mus musculus
MOUSE|MGI=MGI=1920174|UniProtKB=Q8K298	Q8K298	Anillin;Anln;PTN000488858;orthologs	ANILLIN (PTHR21538:SF23)		actomyosin contractile ring assembly(GO:0000915);mitotic cytokinesis(GO:0000281);septin cytoskeleton organization(GO:0032185)	actomyosin contractile ring(GO:0005826)	non-motor actin binding protein(PC00165)		actin binding(GO:0003779);protein binding(GO:0005515)	mitotic cytokinesis(GO:0000281);actomyosin contractile ring assembly(GO:0000915);hematopoietic progenitor cell differentiation(GO:0002244);cell cycle(GO:0007049);septin ring organization(GO:0031106);cell division(GO:0051301);podocyte cell migration(GO:0090521);positive regulation of bleb assembly(GO:1904172)	nucleus(GO:0005634);nucleoplasm(GO:0005654);cytoplasm(GO:0005737);actomyosin contractile ring(GO:0005826);cytoskeleton(GO:0005856);cell cortex(GO:0005938);actin cytoskeleton(GO:0015629);midbody(GO:0030496);bleb(GO:0032059);cell projection(GO:0042995)	RHO GTPase cycle;RHOB GTPase cycle;RHOC GTPase cycle;Signaling by Rho GTPases, Miro GTPases and RHOBTB3;Signal Transduction;Signaling by Rho GTPases;RHOA GTPase cycle					Mus musculus
MOUSE|MGI=MGI=1890149|UniProtKB=P21107	P21107	Tropomyosin alpha-3 chain;Tpm3;PTN000444095;orthologs	TROPOMYOSIN ALPHA-3 CHAIN (PTHR19269:SF38)	actin filament binding(GO:0051015)	muscle contraction(GO:0006936);actin filament organization(GO:0007015)	actin filament(GO:0005884)	actin binding motor protein(PC00040)		actin binding(GO:0003779);protein binding(GO:0005515);actin filament binding(GO:0051015)	muscle contraction(GO:0006936);actin filament organization(GO:0007015)	stress fiber(GO:0001725);podosome(GO:0002102);cytoplasm(GO:0005737);cytosol(GO:0005829);cytoskeleton(GO:0005856);actin filament(GO:0005884);actin cytoskeleton(GO:0015629);growth cone(GO:0030426);cortical cytoskeleton(GO:0030863);cleavage furrow(GO:0032154);neuron projection(GO:0043005)	Muscle contraction;RHO GTPase cycle;Smooth Muscle Contraction;Striated Muscle Contraction;Signaling by Rho GTPases, Miro GTPases and RHOBTB3;Signal Transduction;RHOV GTPase cycle;Signaling by Rho GTPases					Mus musculus
MOUSE|MGI=MGI=1928896|UniProtKB=Q9R0Q6	Q9R0Q6	Actin-related protein 2_3 complex subunit 1A;Arpc1a;PTN000076258;orthologs	ACTIN-RELATED PROTEIN 2_3 COMPLEX SUBUNIT 1A (PTHR10709:SF11)	actin filament binding(GO:0051015)	Arp2/3 complex-mediated actin nucleation(GO:0034314)	Arp2/3 protein complex(GO:0005885)	actin or actin-binding cytoskeletal protein(PC00041)	Inflammation mediated by chemokine and cytokine signaling pathway->Actin related protein 2/3 complex;;Integrin signalling pathway->Actin related protein 2/3 complex;;Cytoskeletal regulation by Rho GTPase->Actin related protein 2/3 complex;;Huntington disease->Actin related protein 2/3 complex;;;;;	actin binding(GO:0003779);protein binding(GO:0005515);actin filament binding(GO:0051015)	Arp2/3 complex-mediated actin nucleation(GO:0034314)	nucleus(GO:0005634);cytoplasm(GO:0005737);cytoskeleton(GO:0005856);Arp2/3 protein complex(GO:0005885);actin cytoskeleton(GO:0015629);muscle cell projection membrane(GO:0036195)	Signaling by Rho GTPases;Developmental Biology;RHO GTPase Effectors;EPHB-mediated forward signaling;EPH-Ephrin signaling;RHO GTPases Activate WASPs and WAVEs;Axon guidance;Clathrin-mediated endocytosis;Membrane Trafficking;Vesicle-mediated transport;Regulation of actin dynamics for phagocytic cup formation;Immune System;Fcgamma receptor (FCGR) dependent phagocytosis;Nervous system development;Inn…					Mus musculus
MOUSE|MGI=MGI=2136772|UniProtKB=Q920Q4	Q920Q4	Vacuolar protein sorting-associated protein 16 homolog;Vps16;PTN000301743;orthologs	VACUOLAR PROTEIN SORTING-ASSOCIATED PROTEIN 16 HOMOLOG (PTHR12811:SF0)	actin binding(GO:0003779)	endosomal transport(GO:0016197);vacuole fusion, non-autophagic(GO:0042144)	membrane protein complex(GO:0098796);endosome(GO:0005768);vesicle tethering complex(GO:0099023);lysosomal membrane(GO:0005765)	membrane traffic protein(PC00150)		actin binding(GO:0003779);protein binding(GO:0005515);actin filament binding(GO:0051015)	intracellular protein transport(GO:0006886);autophagy(GO:0006914);vacuole organization(GO:0007033);endosome to lysosome transport(GO:0008333);protein transport(GO:0015031);endosomal transport(GO:0016197);vacuole fusion, non-autophagic(GO:0042144);symbiont entry into host cell(GO:0046718);autophagosome maturation(GO:0097352)	cytoplasm(GO:0005737);lysosome(GO:0005764);endosome(GO:0005768);early endosome(GO:0005769);late endosome(GO:0005770);actin filament(GO:0005884);membrane(GO:0016020);AP-3 adaptor complex(GO:0030123);clathrin-coated vesicle(GO:0030136);axon(GO:0030424);HOPS complex(GO:0030897);cytoplasmic vesicle(GO:0031410);early endosome membrane(GO:0031901);CORVET complex(GO:0033263);neuronal cell body(GO:004302…						Mus musculus
MOUSE|MGI=MGI=104652|UniProtKB=P47757	P47757	F-actin-capping protein subunit beta;Capzb;PTN000065528;orthologs	F-ACTIN-CAPPING PROTEIN SUBUNIT BETA (PTHR10619:SF0)	actin filament binding(GO:0051015)	barbed-end actin filament capping(GO:0051016);cell morphogenesis(GO:0000902)	actin cytoskeleton(GO:0015629);protein-containing complex(GO:0032991)	non-motor actin binding protein(PC00165)		actin binding(GO:0003779);protein binding(GO:0005515);actin filament binding(GO:0051015)	cell morphogenesis(GO:0000902);cytoskeleton organization(GO:0007010);actin polymerization or depolymerization(GO:0008154);regulation of lamellipodium assembly(GO:0010591);regulation of cell morphogenesis(GO:0022604);cell projection organization(GO:0030030);lamellipodium assembly(GO:0030032);actin cytoskeleton organization(GO:0030036);barbed-end actin filament capping(GO:0051016);negative regulati…	cytoplasm(GO:0005737);cytosol(GO:0005829);cytoskeleton(GO:0005856);brush border(GO:0005903);F-actin capping protein complex(GO:0008290);postsynaptic density(GO:0014069);membrane(GO:0016020);lamellipodium(GO:0030027);cortical cytoskeleton(GO:0030863);asymmetric synapse(GO:0032279);neuronal cell body(GO:0043025);dendritic spine(GO:0043197);WASH complex(GO:0071203);sperm connecting piece(GO:0097224)…	Intra-Golgi and retrograde Golgi-to-ER traffic;Metabolism of proteins;Adaptive Immune System;RHOD GTPase cycle;Transport to the Golgi and subsequent modification;Signal Transduction;MHC class II antigen presentation;Factors involved in megakaryocyte development and platelet production;COPI-mediated anterograde transport;Immune System;Golgi-to-ER retrograde transport;Vesicle-mediated transport;Sig…					Mus musculus
MOUSE|MGI=MGI=106222|UniProtKB=P47754	P47754	F-actin-capping protein subunit alpha-2;Capza2;PTN000068979;orthologs	F-ACTIN-CAPPING PROTEIN SUBUNIT ALPHA-2 (PTHR10653:SF2)	actin filament binding(GO:0051015)	barbed-end actin filament capping(GO:0051016);actin cytoskeleton organization(GO:0030036)	protein-containing complex(GO:0032991);actin cortical patch(GO:0030479)	non-motor actin binding protein(PC00165)		actin binding(GO:0003779);protein binding(GO:0005515);actin filament binding(GO:0051015)	actin cytoskeleton organization(GO:0030036);barbed-end actin filament capping(GO:0051016);actin filament capping(GO:0051693)	cytosol(GO:0005829);brush border(GO:0005903);F-actin capping protein complex(GO:0008290);membrane(GO:0016020);cortical cytoskeleton(GO:0030863)	Innate Immune System;Intra-Golgi and retrograde Golgi-to-ER traffic;Metabolism of proteins;Adaptive Immune System;Transport to the Golgi and subsequent modification;MHC class II antigen presentation;Factors involved in megakaryocyte development and platelet production;COPI-mediated anterograde transport;Immune System;Golgi-to-ER retrograde transport;Vesicle-mediated transport;COPI-independent Gol…					Mus musculus
MOUSE|MGI=MGI=106227|UniProtKB=P47753	P47753	F-actin-capping protein subunit alpha-1;Capza1;PTN000069006;orthologs	F-ACTIN-CAPPING PROTEIN SUBUNIT ALPHA-1 (PTHR10653:SF5)	actin filament binding(GO:0051015)	barbed-end actin filament capping(GO:0051016);actin cytoskeleton organization(GO:0030036)	protein-containing complex(GO:0032991);actin cortical patch(GO:0030479)	non-motor actin binding protein(PC00165)		actin binding(GO:0003779);protein binding(GO:0005515);actin filament binding(GO:0051015)	actin cytoskeleton organization(GO:0030036);cell junction assembly(GO:0034329);barbed-end actin filament capping(GO:0051016);actin filament capping(GO:0051693)	cytoplasm(GO:0005737);cytosol(GO:0005829);cytoskeleton(GO:0005856);brush border(GO:0005903);cell-cell junction(GO:0005911);F-actin capping protein complex(GO:0008290);membrane(GO:0016020);cortical cytoskeleton(GO:0030863);WASH complex(GO:0071203)	Innate Immune System;Intra-Golgi and retrograde Golgi-to-ER traffic;Metabolism of proteins;Adaptive Immune System;Transport to the Golgi and subsequent modification;MHC class II antigen presentation;Factors involved in megakaryocyte development and platelet production;COPI-mediated anterograde transport;Immune System;Golgi-to-ER retrograde transport;Vesicle-mediated transport;COPI-independent Gol…					Mus musculus
MOUSE|MGI=MGI=88262|UniProtKB=P40124	P40124	Adenylyl cyclase-associated protein 1;Cap1;PTN000068861;orthologs	ADENYLYL CYCLASE-ASSOCIATED PROTEIN 1 (PTHR10652:SF1)	actin binding(GO:0003779);enzyme binding(GO:0019899)	cell morphogenesis(GO:0000902);actin filament organization(GO:0007015);cAMP-mediated signaling(GO:0019933)	cytoplasm(GO:0005737)	actin or actin-binding cytoskeletal protein(PC00041)		actin binding(GO:0003779);protein binding(GO:0005515);adenylate cyclase binding(GO:0008179)	cell morphogenesis(GO:0000902);ameboidal-type cell migration(GO:0001667);receptor-mediated endocytosis(GO:0006898);cytoskeleton organization(GO:0007010);actin filament organization(GO:0007015);cAMP-mediated signaling(GO:0019933);actin cytoskeleton organization(GO:0030036)	extracellular region(GO:0005576);cytoplasm(GO:0005737);cytosol(GO:0005829);plasma membrane(GO:0005886);membrane(GO:0016020);cortical actin cytoskeleton(GO:0030864)	Immune System;Innate Immune System;Neutrophil degranulation					Mus musculus
MOUSE|MGI=MGI=108117|UniProtKB=O08579	O08579	Emerin;Emd;PTN000389418;orthologs	EMERIN (PTHR15171:SF2)						actin binding(GO:0003779);protein binding(GO:0005515);beta-tubulin binding(GO:0048487)	skeletal muscle cell differentiation(GO:0035914);positive regulation of protein export from nucleus(GO:0046827);negative regulation of fibroblast proliferation(GO:0048147);regulation of canonical Wnt signaling pathway(GO:0060828);cellular response to growth factor stimulus(GO:0071363);nuclear membrane organization(GO:0071763);negative regulation of canonical Wnt signaling pathway(GO:0090090)	nucleus(GO:0005634);nuclear envelope(GO:0005635);nuclear inner membrane(GO:0005637);nuclear outer membrane(GO:0005640);nuclear lamina(GO:0005652);nucleoplasm(GO:0005654);cytoplasm(GO:0005737);endoplasmic reticulum(GO:0005783);spindle(GO:0005819);microtubule(GO:0005874);membrane(GO:0016020);spindle pole centrosome(GO:0031616);nuclear membrane(GO:0031965);cortical endoplasmic reticulum(GO:0032541);…	Nuclear Envelope (NE) Reassembly;Mitotic Metaphase and Anaphase;Cell Cycle, Mitotic;RHOG GTPase cycle;RHOD GTPase cycle;RAC2 GTPase cycle;Signal Transduction;Mitotic Prophase;Signaling by Rho GTPases, Miro GTPases and RHOBTB3;Insertion of tail-anchored proteins into the endoplasmic reticulum membrane;Depolymerization of the Nuclear Lamina;M Phase;Cell Cycle;Mitotic Anaphase;Initiation of Nuclear …					Mus musculus
MOUSE|MGI=MGI=1345963|UniProtKB=Q9WUM3	Q9WUM3	Coronin-1B;Coro1b;PTN000091878;orthologs	CORONIN-1B (PTHR10856:SF24)	actin filament binding(GO:0051015)	actin filament organization(GO:0007015);cell migration(GO:0016477)		non-motor actin binding protein(PC00165)		actin binding(GO:0003779);protein binding(GO:0005515);cytoskeletal protein binding(GO:0008092);identical protein binding(GO:0042802);protein-containing complex binding(GO:0044877);actin filament binding(GO:0051015);Arp2/3 complex binding(GO:0071933)	actin filament organization(GO:0007015);cell migration(GO:0016477);actin cytoskeleton organization(GO:0030036);ruffle organization(GO:0031529);negative regulation of Arp2/3 complex-mediated actin nucleation(GO:0034316);endothelial cell chemotaxis(GO:0035767);cellular response to platelet-derived growth factor stimulus(GO:0036120);wound healing(GO:0042060);actin filament bundle assembly(GO:0051017…	stress fiber(GO:0001725);cytoplasm(GO:0005737);cytosol(GO:0005829);cytoskeleton(GO:0005856);actin filament(GO:0005884);plasma membrane(GO:0005886);lamellipodium(GO:0030027);cell leading edge(GO:0031252);perinuclear region of cytoplasm(GO:0048471);cell periphery(GO:0071944)						Mus musculus
MOUSE|MGI=MGI=97887|UniProtKB=P26043	P26043	Radixin;Rdx;PTN000590054;orthologs	RADIXIN (PTHR23281:SF14)	actin binding(GO:0003779);cell adhesion molecule binding(GO:0050839)	positive regulation of protein localization(GO:1903829);regulation of cell shape(GO:0008360);positive regulation of transport(GO:0051050);regulation of organelle assembly(GO:1902115);regulation of vesicle-mediated transport(GO:0060627)	adherens junction(GO:0005912);apical part of cell(GO:0045177);microvillus(GO:0005902);filopodium(GO:0030175);plasma membrane(GO:0005886)	actin or actin-binding cytoskeletal protein(PC00041)		actin binding(GO:0003779);protein binding(GO:0005515);cytoskeletal protein binding(GO:0008092);protein domain specific binding(GO:0019904);cell adhesion molecule binding(GO:0050839);protein kinase A binding(GO:0051018);ATPase binding(GO:0051117)	regulation of cell shape(GO:0008360);regulation of cell size(GO:0008361);positive regulation of gene expression(GO:0010628);protein kinase A signaling(GO:0010737);microvillus assembly(GO:0030033);positive regulation of cell migration(GO:0030335);regulation of actin filament bundle assembly(GO:0032231);regulation of Rap protein signal transduction(GO:0032487);negative regulation of homotypic cell-…	ruffle(GO:0001726);cytoplasm(GO:0005737);cytosol(GO:0005829);cytoskeleton(GO:0005856);plasma membrane(GO:0005886);microvillus(GO:0005902);adherens junction(GO:0005912);focal adhesion(GO:0005925);membrane(GO:0016020);apical plasma membrane(GO:0016324);lamellipodium(GO:0030027);filopodium(GO:0030175);T-tubule(GO:0030315);midbody(GO:0030496);cortical actin cytoskeleton(GO:0030864);cleavage furrow(GO…	Developmental Biology;Axon guidance;Nervous system development;L1CAM interactions;Recycling pathway of L1					Mus musculus
MOUSE|MGI=MGI=2449316|UniProtKB=Q6ZWQ0	Q6ZWQ0	Nesprin-2;Syne2;PTN000747792;orthologs	NESPRIN-2 (PTHR14514:SF4)						actin binding(GO:0003779);protein binding(GO:0005515);cytoskeleton-nuclear membrane anchor activity(GO:0140444)	nuclear migration(GO:0007097);nucleokinesis involved in cell motility in cerebral cortex radial glia guided migration(GO:0021817);positive regulation of cell migration(GO:0030335);nuclear migration along microfilament(GO:0031022);centrosome localization(GO:0051642);regulation of cilium assembly(GO:1902017)	nucleus(GO:0005634);nuclear envelope(GO:0005635);nuclear outer membrane(GO:0005640);cytoplasm(GO:0005737);mitochondrion(GO:0005739);cytoskeleton(GO:0005856);plasma membrane(GO:0005886);focal adhesion(GO:0005925);membrane(GO:0016020);sarcoplasmic reticulum(GO:0016529);myofibril(GO:0030016);Z disc(GO:0030018);lamellipodium membrane(GO:0031258);filopodium membrane(GO:0031527);nuclear membrane(GO:003…						Mus musculus
MOUSE|MGI=MGI=1919292|UniProtKB=Q9CQI6	Q9CQI6	Coactosin-like protein;Cotl1;PTN000851022;orthologs	COACTOSIN-LIKE PROTEIN (PTHR10829:SF29)	actin filament binding(GO:0051015)	regulation of actin filament polymerization(GO:0030833)	site of polarized growth(GO:0030427);actin filament(GO:0005884);cortical actin cytoskeleton(GO:0030864)	non-motor actin binding protein(PC00165)		actin binding(GO:0003779);protein binding(GO:0005515);enzyme binding(GO:0019899);actin filament binding(GO:0051015)	regulation of actin filament polymerization(GO:0030833);defense response to fungus(GO:0050832)	nucleus(GO:0005634);cytoplasm(GO:0005737);cytosol(GO:0005829);cytoskeleton(GO:0005856);actin filament(GO:0005884);site of polarized growth(GO:0030427);cortical actin cytoskeleton(GO:0030864)	Immune System;Innate Immune System;Neutrophil degranulation					Mus musculus
MOUSE|MGI=MGI=2384850|UniProtKB=Q8R1G6	Q8R1G6	PDZ and LIM domain protein 2;Pdlim2;PTN000655172;orthologs	PDZ AND LIM DOMAIN PROTEIN 2 (PTHR24214:SF1)	actin binding(GO:0003779)	heart development(GO:0007507);muscle structure development(GO:0061061);actin cytoskeleton organization(GO:0030036)	Z disc(GO:0030018);adherens junction(GO:0005912);stress fiber(GO:0001725);protein-containing complex(GO:0032991);actin filament(GO:0005884)	actin or actin-binding cytoskeletal protein(PC00041)		actin binding(GO:0003779);protein binding(GO:0005515);filamin binding(GO:0031005);ubiquitin protein ligase binding(GO:0031625);myosin heavy chain binding(GO:0032036);metal ion binding(GO:0046872);muscle alpha-actinin binding(GO:0051371);alpha-actinin binding(GO:0051393)	heart development(GO:0007507);actin cytoskeleton organization(GO:0030036);protein catabolic process(GO:0030163);muscle structure development(GO:0061061)	stress fiber(GO:0001725);cytoplasm(GO:0005737);cytoskeleton(GO:0005856);adherens junction(GO:0005912);Z disc(GO:0030018);cortical actin cytoskeleton(GO:0030864);filamentous actin(GO:0031941)						Mus musculus
MOUSE|MGI=MGI=2446089|UniProtKB=Q80X90	Q80X90	Filamin-B;Flnb;PTN000747317;orthologs	FILAMIN-B (PTHR38537:SF7)					Integrin signalling pathway->Filamin;;	actin binding(GO:0003779);protein binding(GO:0005515);identical protein binding(GO:0042802);actin filament binding(GO:0051015)	keratinocyte development(GO:0003334);epithelial cell morphogenesis(GO:0003382);skeletal muscle tissue development(GO:0007519);actin cytoskeleton organization(GO:0030036);cellular response to type II interferon(GO:0071346)	stress fiber(GO:0001725);cytoplasm(GO:0005737);cytosol(GO:0005829);cytoskeleton(GO:0005856);plasma membrane(GO:0005886);brush border(GO:0005903);focal adhesion(GO:0005925);neuronal cell body(GO:0043025);phagocytic vesicle(GO:0045335)	Interferon Signaling;Immune System;Cytokine Signaling in Immune system;Antiviral mechanism by IFN-stimulated genes;ISG15 antiviral mechanism					Mus musculus
MOUSE|MGI=MGI=2178800|UniProtKB=Q9DAD6	Q9DAD6	Profilin-3;Pfn3;PTN000358493;orthologs	PROFILIN-3 (PTHR13936:SF2)	actin binding(GO:0003779)	regulation of actin filament polymerization(GO:0030833);positive regulation of actin filament bundle assembly(GO:0032233)	cytoplasm(GO:0005737)	non-motor actin binding protein(PC00165)	Cytoskeletal regulation by Rho GTPase->Profilin;;	actin binding(GO:0003779);protein binding(GO:0005515);lipid binding(GO:0008289)	actin cytoskeleton organization(GO:0030036);regulation of actin filament polymerization(GO:0030833);positive regulation of actin filament bundle assembly(GO:0032233)	nucleus(GO:0005634);cytoplasm(GO:0005737);cytoskeleton(GO:0005856)						Mus musculus
MOUSE|MGI=MGI=1194500|UniProtKB=Q8K4G5	Q8K4G5	Actin-binding LIM protein 1;Ablim1;PTN000655092;orthologs	ACTIN-BINDING LIM PROTEIN 1 (PTHR24213:SF18)	actin filament binding(GO:0051015)	cilium assembly(GO:0060271)	stress fiber(GO:0001725)	actin or actin-binding cytoskeletal protein(PC00041)	Axon guidance mediated by netrin->Actin binding LIM protein 1;;	actin binding(GO:0003779);protein binding(GO:0005515);metal ion binding(GO:0046872);actin filament binding(GO:0051015)	transcription by RNA polymerase II(GO:0006366);cytoskeleton organization(GO:0007010);axon guidance(GO:0007411);lamellipodium assembly(GO:0030032);positive regulation of transcription by RNA polymerase II(GO:0045944);cilium assembly(GO:0060271)	stress fiber(GO:0001725);cytoplasm(GO:0005737);cytoskeleton(GO:0005856);postsynaptic density(GO:0014069);actin cytoskeleton(GO:0015629);lamellipodium(GO:0030027)						Mus musculus
MOUSE|MGI=MGI=1914649|UniProtKB=Q3TJD7	Q3TJD7	PDZ and LIM domain protein 7;Pdlim7;PTN000655202;orthologs	PDZ AND LIM DOMAIN PROTEIN 7 (PTHR24214:SF0)	actin binding(GO:0003779)	heart development(GO:0007507);muscle structure development(GO:0061061);actin cytoskeleton organization(GO:0030036)	Z disc(GO:0030018);adherens junction(GO:0005912);stress fiber(GO:0001725);protein-containing complex(GO:0032991);actin filament(GO:0005884)	actin or actin-binding cytoskeletal protein(PC00041)		actin binding(GO:0003779);protein binding(GO:0005515);metal ion binding(GO:0046872);muscle alpha-actinin binding(GO:0051371)	ossification(GO:0001503);multicellular organism development(GO:0007275);heart development(GO:0007507);actin cytoskeleton organization(GO:0030036);cell differentiation(GO:0030154);positive regulation of osteoblast differentiation(GO:0045669);muscle structure development(GO:0061061)	stress fiber(GO:0001725);ruffle(GO:0001726);nucleoplasm(GO:0005654);cytoplasm(GO:0005737);cytoskeleton(GO:0005856);adherens junction(GO:0005912);focal adhesion(GO:0005925);actin cytoskeleton(GO:0015629);Z disc(GO:0030018);filamentous actin(GO:0031941)	Developmental Biology;Axon guidance;RET signaling;Nervous system development					Mus musculus
MOUSE|MGI=MGI=98931|UniProtKB=P26040	P26040	Ezrin;Ezr;PTN000590031;orthologs	EZRIN (PTHR23281:SF13)	actin binding(GO:0003779);cell adhesion molecule binding(GO:0050839)	positive regulation of protein localization(GO:1903829);regulation of cell shape(GO:0008360);positive regulation of transport(GO:0051050);regulation of organelle assembly(GO:1902115);regulation of vesicle-mediated transport(GO:0060627)	adherens junction(GO:0005912);apical part of cell(GO:0045177);microvillus(GO:0005902);filopodium(GO:0030175);plasma membrane(GO:0005886)	actin or actin-binding cytoskeletal protein(PC00041)		actin binding(GO:0003779);protein binding(GO:0005515);microtubule binding(GO:0008017);cytoskeletal protein binding(GO:0008092);protein domain specific binding(GO:0019904);protein kinase A catalytic subunit binding(GO:0034236);protein kinase A regulatory subunit binding(GO:0034237);identical protein binding(GO:0042802);S100 protein binding(GO:0044548);protein-containing complex binding(GO:0044877)…	negative regulation of transcription by RNA polymerase II(GO:0000122);intestinal D-glucose absorption(GO:0001951);sphingosine-1-phosphate receptor signaling pathway(GO:0003376);regulation of cell shape(GO:0008360);positive regulation of gene expression(GO:0010628);protein kinase A signaling(GO:0010737);actin cytoskeleton organization(GO:0030036);astral microtubule organization(GO:0030953);protein…	fibrillar center(GO:0001650);ruffle(GO:0001726);immunological synapse(GO:0001772);uropod(GO:0001931);intracellular anatomical structure(GO:0005622);cytoplasm(GO:0005737);endosome(GO:0005768);cytosol(GO:0005829);cytoskeleton(GO:0005856);actin filament(GO:0005884);plasma membrane(GO:0005886);microvillus(GO:0005902);brush border(GO:0005903);adherens junction(GO:0005912);focal adhesion(GO:0005925);ac…	Developmental Biology;Axon guidance;Nervous system development;Netrin-1 signaling;L1CAM interactions;Recycling pathway of L1					Mus musculus
MOUSE|MGI=MGI=1927222|UniProtKB=Q9Z207	Q9Z207	Protein diaphanous homolog 3;Diaph3;PTN000575534;orthologs	PROTEIN DIAPHANOUS HOMOLOG 3 (PTHR45691:SF9)		actin filament polymerization(GO:0030041)	actin filament(GO:0005884)	cytoskeletal protein(PC00085)	Cytoskeletal regulation by Rho GTPase->Mammalian diaphanous;;	actin binding(GO:0003779);protein binding(GO:0005515);microtubule binding(GO:0008017);cytoskeletal protein binding(GO:0008092);small GTPase binding(GO:0031267);protein homodimerization activity(GO:0042803)	microtubule cytoskeleton organization(GO:0000226);cytokinesis(GO:0000910);in utero embryonic development(GO:0001701);organelle organization(GO:0006996);cytoskeleton organization(GO:0007010);actin filament organization(GO:0007015);negative regulation of microtubule depolymerization(GO:0007026);chromosome segregation(GO:0007059);integrin-mediated signaling pathway(GO:0007229);sensory perception of …	ESCRT I complex(GO:0000813);spindle pole(GO:0000922);nucleus(GO:0005634);cytoplasm(GO:0005737);microtubule organizing center(GO:0005815);actin filament(GO:0005884);filamentous actin(GO:0031941);cleavage furrow(GO:0032154);actin filament bundle(GO:0032432);ribbon synapse(GO:0097470);stereocilia tip-link density(GO:1990427)	Signaling by Rho GTPases;RHO GTPase Effectors;RAC3 GTPase cycle;RHOB GTPase cycle;RHOF GTPase cycle;RHOA GTPase cycle;RAC1 GTPase cycle;RHOG GTPase cycle;RHOQ GTPase cycle;RHOD GTPase cycle;RAC2 GTPase cycle;RHO GTPase cycle;RHO GTPases Activate Formins;Signal Transduction;RHOC GTPase cycle;Signaling by Rho GTPases, Miro GTPases and RHOBTB3					Mus musculus
MOUSE|MGI=MGI=109656|UniProtKB=Q61792	Q61792	LIM and SH3 domain protein 1;Lasp1;PTN000113334;orthologs	LIM AND SH3 DOMAIN PROTEIN 1 (PTHR46218:SF2)	actin filament binding(GO:0051015)		focal adhesion(GO:0005925)			actin binding(GO:0003779);protein binding(GO:0005515);monoatomic ion transmembrane transporter activity(GO:0015075);metal ion binding(GO:0046872);actin filament binding(GO:0051015)	monoatomic ion transport(GO:0006811)	cytoplasm(GO:0005737);cytoskeleton(GO:0005856);focal adhesion(GO:0005925);cortical actin cytoskeleton(GO:0030864);postsynapse(GO:0098794)						Mus musculus
MOUSE|MGI=MGI=2384407|UniProtKB=Q8K3I4	Q8K3I4	Rab effector MyRIP;Myrip;PTN000377435;orthologs	RAB EFFECTOR MYRIP (PTHR14555:SF6)	actin binding(GO:0003779);myosin binding(GO:0017022)		cortical actin cytoskeleton(GO:0030864)	myelin protein(PC00161)		actin binding(GO:0003779);protein binding(GO:0005515);myosin binding(GO:0017022);small GTPase binding(GO:0031267);metal ion binding(GO:0046872);protein kinase A binding(GO:0051018)	intracellular protein transport(GO:0006886);vesicle transport along actin filament(GO:0030050);positive regulation of insulin secretion(GO:0032024)	exocyst(GO:0000145);photoreceptor outer segment(GO:0001750);cytoplasm(GO:0005737);actin cytoskeleton(GO:0015629);apical plasma membrane(GO:0016324);cortical actin cytoskeleton(GO:0030864);dense core granule(GO:0031045);cytoplasmic vesicle(GO:0031410);melanosome(GO:0042470);synapse(GO:0045202);perinuclear region of cytoplasm(GO:0048471)						Mus musculus
MOUSE|MGI=MGI=1342286|UniProtKB=Q9JJ28	Q9JJ28	Protein flightless-1 homolog;Flii;PTN000240134;orthologs	PROTEIN FLIGHTLESS-1 HOMOLOG (PTHR11977:SF139)	actin filament binding(GO:0051015);phosphatidylinositol-4,5-bisphosphate binding(GO:0005546)	myofibril assembly(GO:0030239);barbed-end actin filament capping(GO:0051016);actin polymerization or depolymerization(GO:0008154)	nucleus(GO:0005634);cytoplasm(GO:0005737);actin cytoskeleton(GO:0015629)	non-motor actin binding protein(PC00165)		actin binding(GO:0003779);protein binding(GO:0005515);phosphatidylinositol-4,5-bisphosphate binding(GO:0005546);actin filament binding(GO:0051015)	multicellular organism development(GO:0007275);actin polymerization or depolymerization(GO:0008154);actin cytoskeleton organization(GO:0030036);myofibril assembly(GO:0030239);actin filament severing(GO:0051014);barbed-end actin filament capping(GO:0051016)	nucleus(GO:0005634);nucleoplasm(GO:0005654);cytoplasm(GO:0005737);cytosol(GO:0005829);cytoskeleton(GO:0005856);brush border(GO:0005903);actin cytoskeleton(GO:0015629);centriolar satellite(GO:0034451);anchoring junction(GO:0070161)						Mus musculus
MOUSE|MGI=MGI=1099804|UniProtKB=Q8VD75	Q8VD75	Huntingtin-interacting protein 1;Hip1;PTN000045183;orthologs	HUNTINGTIN-INTERACTING PROTEIN 1 (PTHR10407:SF14)	actin filament binding(GO:0051015);phosphatidylinositol bisphosphate binding(GO:1902936);anion binding(GO:0043168);clathrin binding(GO:0030276);protein-macromolecule adaptor activity(GO:0030674)	protein-containing complex assembly(GO:0065003);actin filament organization(GO:0007015);activation of cysteine-type endopeptidase activity involved in apoptotic process(GO:0006919);endocytosis(GO:0006897)	presynapse(GO:0098793);clathrin-coated vesicle(GO:0030136);actin cortical patch(GO:0030479)	non-motor actin binding protein(PC00165)	Huntington disease->Huntington interacting protein-1;;	actin binding(GO:0003779);protein binding(GO:0005515);phospholipid binding(GO:0005543);clathrin binding(GO:0030276);clathrin light chain binding(GO:0032051);phosphatidylinositol-3-phosphate binding(GO:0032266);phosphatidylinositol binding(GO:0035091);AP-2 adaptor complex binding(GO:0035612);clathrin adaptor activity(GO:0035615);protein homodimerization activity(GO:0042803);phosphatidylinositol-3,…	endocytosis(GO:0006897);apoptotic process(GO:0006915);activation of cysteine-type endopeptidase activity involved in apoptotic process(GO:0006919);actin filament organization(GO:0007015);cell differentiation(GO:0030154);regulation of apoptotic process(GO:0042981);positive regulation of epidermal growth factor receptor signaling pathway(GO:0045742);positive regulation of receptor-mediated endocyto…	nucleus(GO:0005634);cytoplasm(GO:0005737);Golgi apparatus(GO:0005794);plasma membrane(GO:0005886);membrane(GO:0016020);clathrin-coated vesicle(GO:0030136);cytoplasmic vesicle(GO:0031410);presynaptic membrane(GO:0042734);intracellular membrane-bounded organelle(GO:0043231);postsynaptic membrane(GO:0045211);Schaffer collateral - CA1 synapse(GO:0098685);presynapse(GO:0098793);postsynapse(GO:0098794)…	Membrane Trafficking;Clathrin-mediated endocytosis;Vesicle-mediated transport					Mus musculus
MOUSE|MGI=MGI=1352504|UniProtKB=Q9JKY5	Q9JKY5	Huntingtin-interacting protein 1-related protein;Hip1r;PTN000045154;orthologs	HUNTINGTIN-INTERACTING PROTEIN 1-RELATED PROTEIN (PTHR10407:SF10)	actin filament binding(GO:0051015);phosphatidylinositol bisphosphate binding(GO:1902936);anion binding(GO:0043168);clathrin binding(GO:0030276);protein-macromolecule adaptor activity(GO:0030674)	protein-containing complex assembly(GO:0065003);actin filament organization(GO:0007015);activation of cysteine-type endopeptidase activity involved in apoptotic process(GO:0006919);endocytosis(GO:0006897)	clathrin-coated vesicle(GO:0030136);actin cortical patch(GO:0030479)	non-motor actin binding protein(PC00165)	Huntington disease->Huntingtin interacting protein 12;;	actin binding(GO:0003779);protein binding(GO:0005515);phospholipid binding(GO:0005543);phosphatidylinositol-4,5-bisphosphate binding(GO:0005546);phosphatidylinositol-3,4,5-trisphosphate binding(GO:0005547);SH3 domain binding(GO:0017124);clathrin binding(GO:0030276);clathrin light chain binding(GO:0032051);phosphatidylinositol binding(GO:0035091);clathrin adaptor activity(GO:0035615);identical pro…	endocytosis(GO:0006897);receptor-mediated endocytosis(GO:0006898);activation of cysteine-type endopeptidase activity involved in apoptotic process(GO:0006919);actin filament organization(GO:0007015);regulation of endocytosis(GO:0030100);negative regulation of actin filament polymerization(GO:0030837);positive regulation of protein binding(GO:0032092);regulation of actin cytoskeleton organization(…	cytoplasm(GO:0005737);cytosol(GO:0005829);cytoskeleton(GO:0005856);plasma membrane(GO:0005886);clathrin-coated pit(GO:0005905);cell cortex(GO:0005938);postsynaptic density(GO:0014069);membrane(GO:0016020);apical plasma membrane(GO:0016324);clathrin-coated vesicle(GO:0030136);cytoplasmic vesicle(GO:0031410);ruffle membrane(GO:0032587);dendrite cytoplasm(GO:0032839);neuronal cell body(GO:0043025);d…	trans-Golgi Network Vesicle Budding;Membrane Trafficking;Clathrin-mediated endocytosis;Golgi Associated Vesicle Biogenesis;Vesicle-mediated transport					Mus musculus
MOUSE|MGI=MGI=1194884|UniProtKB=P70429	P70429	Ena_VASP-like protein;Evl;PTN000128533;orthologs	ENA_VASP-LIKE PROTEIN (PTHR11202:SF4)	SH3 domain binding(GO:0017124)	regulation of actin filament polymerization(GO:0030833);actin polymerization or depolymerization(GO:0008154);positive regulation of organelle organization(GO:0010638);positive regulation of protein polymerization(GO:0032273)		scaffold/adaptor protein(PC00226)	Cytoskeletal regulation by Rho GTPase->Enabled/vasodialator stimulated phosphoprotein;;	actin binding(GO:0003779);protein binding(GO:0005515);profilin binding(GO:0005522);SH3 domain binding(GO:0017124)	axon guidance(GO:0007411);actin polymerization or depolymerization(GO:0008154);negative regulation of epithelial cell migration(GO:0010633);actin filament-based movement(GO:0030048);platelet activation(GO:0030168);positive regulation of actin filament polymerization(GO:0030838);actin nucleation(GO:0045010);barbed-end actin filament capping(GO:0051016);protein homotetramerization(GO:0051289);posit…	cytoplasm(GO:0005737);cytoskeleton(GO:0005856);focal adhesion(GO:0005925);lamellipodium(GO:0030027);cell projection(GO:0042995);phagocytic vesicle(GO:0045335)	Signaling by Rho GTPases;RHO GTPase Effectors;Developmental Biology;Axon guidance;Nervous system development;Signaling by ROBO receptors;RHO GTPases Activate Formins;Signal Transduction;Signaling by Rho GTPases, Miro GTPases and RHOBTB3					Mus musculus
MOUSE|MGI=MGI=109268|UniProtKB=P70460	P70460	Vasodilator-stimulated phosphoprotein;Vasp;PTN000128585;orthologs	VASODILATOR-STIMULATED PHOSPHOPROTEIN (PTHR11202:SF12)	SH3 domain binding(GO:0017124)	regulation of actin filament polymerization(GO:0030833);chordate embryonic development(GO:0043009);embryonic morphogenesis(GO:0048598);morphogenesis of an epithelium(GO:0002009);positive regulation of organelle organization(GO:0010638);positive regulation of protein polymerization(GO:0032273);tube morphogenesis(GO:0035239);anatomical structure formation involved in morphogenesis(GO:0048646);axon …		scaffold/adaptor protein(PC00226)	Integrin signalling pathway->Vasodilator-stimulated phosphoprotein;;Axon guidance mediated by netrin->Enabled;;Cytoskeletal regulation by Rho GTPase->Enabled/vasodialator stimulated phosphoprotein;;;;	actin binding(GO:0003779);protein binding(GO:0005515);profilin binding(GO:0005522);SH3 domain binding(GO:0017124)	neural tube closure(GO:0001843);axon guidance(GO:0007411);actin polymerization or depolymerization(GO:0008154);actin cytoskeleton organization(GO:0030036);positive regulation of actin filament polymerization(GO:0030838);protein homotetramerization(GO:0051289)	cytoplasm(GO:0005737);cytosol(GO:0005829);cytoskeleton(GO:0005856);plasma membrane(GO:0005886);bicellular tight junction(GO:0005923);focal adhesion(GO:0005925);membrane(GO:0016020);lamellipodium(GO:0030027);filopodium(GO:0030175);cell projection(GO:0042995);anchoring junction(GO:0070161)	Developmental Biology;Axon guidance;Cell-Cell communication;Cell-extracellular matrix interactions;Nervous system development;Cell junction organization;Signaling by ROBO receptors					Mus musculus
MOUSE|MGI=MGI=1888994|UniProtKB=Q9JL26	Q9JL26	Formin-like protein 1;Fmnl1;PTN000575402;orthologs	FORMIN-LIKE PROTEIN 1 (PTHR45857:SF2)	actin filament binding(GO:0051015)	cortical actin cytoskeleton organization(GO:0030866);regulation of cell shape(GO:0008360);cell migration(GO:0016477)	cytosol(GO:0005829)			actin binding(GO:0003779);protein binding(GO:0005515);profilin binding(GO:0005522);small GTPase binding(GO:0031267);GTPase activating protein binding(GO:0032794);actin filament binding(GO:0051015)	substrate-dependent cell migration(GO:0006929);cytoskeleton organization(GO:0007010);regulation of cell shape(GO:0008360);cellular component organization(GO:0016043);cell migration(GO:0016477);regulation of cell morphogenesis(GO:0022604);actin cytoskeleton organization(GO:0030036);cortical actin cytoskeleton organization(GO:0030866);actin filament severing(GO:0051014)	cytoplasm(GO:0005737);cytosol(GO:0005829);plasma membrane(GO:0005886);membrane(GO:0016020);cytoplasmic vesicle(GO:0031410);phagocytic vesicle(GO:0045335)	RHO GTPase cycle;RHO GTPase Effectors;Signaling by Rho GTPases, Miro GTPases and RHOBTB3;Signal Transduction;RAC1 GTPase cycle;Signaling by Rho GTPases;RHO GTPases Activate Formins					Mus musculus
MOUSE|MGI=MGI=1194490|UniProtKB=O08808	O08808	Protein diaphanous homolog 1;Diaph1;PTN000575503;orthologs	PROTEIN DIAPHANOUS HOMOLOG 1 (PTHR45691:SF4)		actin filament polymerization(GO:0030041)	actin filament(GO:0005884)	cytoskeletal protein(PC00085)	Cytoskeletal regulation by Rho GTPase->Mammalian diaphanous;;	actin binding(GO:0003779);protein binding(GO:0005515);profilin binding(GO:0005522);small GTPase binding(GO:0031267);identical protein binding(GO:0042802);transmembrane transporter binding(GO:0044325)	cytoskeleton organization(GO:0007010);brain development(GO:0007420);sensory perception of sound(GO:0007605);protein localization(GO:0008104);regulation of cell shape(GO:0008360);gene expression(GO:0010467);cellular component organization(GO:0016043);axon midline choice point recognition(GO:0016199);actin cytoskeleton organization(GO:0030036);actin filament polymerization(GO:0030041);positive regu…	nucleus(GO:0005634);cytoplasm(GO:0005737);cytoskeleton(GO:0005856);actin filament(GO:0005884);plasma membrane(GO:0005886);brush border(GO:0005903);membrane(GO:0016020);ruffle membrane(GO:0032587);cell projection(GO:0042995);neuron projection(GO:0043005);synapse(GO:0045202);mitotic spindle(GO:0072686);presynapse(GO:0098793)	Signaling by Rho GTPases;RHO GTPase Effectors;Signaling by Receptor Tyrosine Kinases;RHOB GTPase cycle;RHOF GTPase cycle;RHOA GTPase cycle;Neutrophil degranulation;Immune System;ERBB2 Regulates Cell Motility;RHOD GTPase cycle;RHO GTPase cycle;Innate Immune System;Signaling by ERBB2;RHO GTPases Activate Formins;Signal Transduction;Signaling by Rho GTPases, Miro GTPases and RHOBTB3;RHOC GTPase cycle					Mus musculus
MOUSE|MGI=MGI=700006|UniProtKB=Q62418	Q62418	Drebrin-like protein;Dbnl;PTN000089295;orthologs	DREBRIN-LIKE PROTEIN (PTHR10829:SF12)	actin filament binding(GO:0051015)	regulation of actin filament polymerization(GO:0030833);positive regulation of cell growth(GO:0030307);positive regulation of axonogenesis(GO:0050772);regulation of cell size(GO:0008361);neuron projection morphogenesis(GO:0048812);postsynapse organization(GO:0099173);actin cytoskeleton organization(GO:0030036);regulation of dendrite morphogenesis(GO:0048814);regulation of postsynapse organization…	dendrite(GO:0030425);postsynaptic density(GO:0014069);site of polarized growth(GO:0030427);postsynaptic membrane(GO:0045211);actin filament(GO:0005884);cortical actin cytoskeleton(GO:0030864);lamellipodium(GO:0030027)	non-motor actin binding protein(PC00165)		actin binding(GO:0003779);protein binding(GO:0005515);protein domain specific binding(GO:0019904);actin filament binding(GO:0051015);structural constituent of postsynaptic actin cytoskeleton(GO:0098973)	adaptive immune response(GO:0002250);immune system process(GO:0002376);endocytosis(GO:0006897);synapse assembly(GO:0007416);Rac protein signal transduction(GO:0016601);regulation of actin filament polymerization(GO:0030833);positive regulation of axon extension(GO:0045773);neuron projection morphogenesis(GO:0048812);positive regulation of dendritic spine morphogenesis(GO:0061003);podosome assembl…	ruffle(GO:0001726);podosome(GO:0002102);cytoplasm(GO:0005737);endosome(GO:0005768);Golgi apparatus(GO:0005794);cytoskeleton(GO:0005856);actin filament(GO:0005884);plasma membrane(GO:0005886);cell cortex(GO:0005938);postsynaptic density(GO:0014069);membrane(GO:0016020);lamellipodium(GO:0030027);dendrite(GO:0030425);site of polarized growth(GO:0030427);cortical actin cytoskeleton(GO:0030864);cytopl…						Mus musculus
MOUSE|MGI=MGI=1321396|UniProtKB=P97814	P97814	Proline-serine-threonine phosphatase-interacting protein 1;Pstpip1;PTN000552222;orthologs	PROLINE-SERINE-THREONINE PHOSPHATASE-INTERACTING PROTEIN 1 (PTHR23065:SF51)	actin filament binding(GO:0051015)	actin filament polymerization(GO:0030041)	cytoplasm(GO:0005737);actin filament(GO:0005884);plasma membrane(GO:0005886)	actin or actin-binding cytoskeletal protein(PC00041)		actin binding(GO:0003779);protein binding(GO:0005515);protein phosphatase binding(GO:0019903);identical protein binding(GO:0042802);actin filament binding(GO:0051015)	cytokinesis(GO:0000910);immune system process(GO:0002376);endocytosis(GO:0006897);inflammatory response(GO:0006954);cell adhesion(GO:0007155);actin filament polymerization(GO:0030041);innate immune response(GO:0045087)	stress fiber(GO:0001725);cytoplasm(GO:0005737);actomyosin contractile ring(GO:0005826);cytosol(GO:0005829);cytoskeleton(GO:0005856);actin filament(GO:0005884);plasma membrane(GO:0005886);membrane(GO:0016020);cleavage furrow(GO:0032154);cell projection(GO:0042995)	Immune System;Inflammasomes;Innate Immune System;The NLRP3 inflammasome;Nucleotide-binding domain, leucine rich repeat containing receptor (NLR) signaling pathways					Mus musculus
MOUSE|MGI=MGI=1098233|UniProtKB=O55091	O55091	Protein IMPACT;Impact;PTN000418677;orthologs	PROTEIN IMPACT (PTHR16301:SF20)		regulation of translational initiation(GO:0006446)	cytoplasm(GO:0005737)			actin binding(GO:0003779);protein binding(GO:0005515);ribosome binding(GO:0043022);protein sequestering activity(GO:0140311)	negative regulation of transcription by RNA polymerase II(GO:0000122);negative regulation of protein phosphorylation(GO:0001933);regulation of translation(GO:0006417);regulation of translational initiation(GO:0006446);nervous system development(GO:0007399);cell differentiation(GO:0030154);cellular response to amino acid starvation(GO:0034198);intracellular signal transduction(GO:0035556);positive…	cytoplasm(GO:0005737);cytosol(GO:0005829)						Mus musculus
MOUSE|MGI=MGI=2178801|UniProtKB=Q8K1I7	Q8K1I7	WAS_WASL-interacting protein family member 1;Wipf1;PTN000574673;orthologs	WAS_WASL-INTERACTING PROTEIN FAMILY MEMBER 1 (PTHR48226:SF1)						actin binding(GO:0003779);protein binding(GO:0005515);SH3 domain binding(GO:0017124);protein folding chaperone(GO:0044183)	actin cytoskeleton organization(GO:0030036);actin filament-based movement(GO:0030048);positive regulation of protein export from nucleus(GO:0046827);response to other organism(GO:0051707)	cytoplasm(GO:0005737);cytoskeleton(GO:0005856);actin filament(GO:0005884);actin cytoskeleton(GO:0015629);cytoplasmic vesicle(GO:0031410);cell projection(GO:0042995)	Signaling by Rho GTPases;RHO GTPase Effectors;RHO GTPases Activate WASPs and WAVEs;Regulation of actin dynamics for phagocytic cup formation;Immune System;Fcgamma receptor (FCGR) dependent phagocytosis;Innate Immune System;Signal Transduction;Signaling by Rho GTPases, Miro GTPases and RHOBTB3					Mus musculus
MOUSE|MGI=MGI=1098641|UniProtKB=Q8BH43	Q8BH43	Wiskott-Aldrich syndrome protein family member 2;Wasf2;PTN000307608;orthologs	WISKOTT-ALDRICH SYNDROME PROTEIN FAMILY MEMBER 2 (PTHR12902:SF6)	protein kinase A regulatory subunit binding(GO:0034237);protein-containing complex binding(GO:0044877)	positive regulation of organelle organization(GO:0010638);actin cytoskeleton organization(GO:0030036);regulation of actin filament organization(GO:0110053)	cytoplasm(GO:0005737);protein-containing complex(GO:0032991);lamellipodium(GO:0030027)	non-motor actin binding protein(PC00165)		actin binding(GO:0003779);protein binding(GO:0005515);SH3 domain binding(GO:0017124);protein kinase A regulatory subunit binding(GO:0034237);protein kinase A binding(GO:0051018);Arp2/3 complex binding(GO:0071933)	angiogenesis(GO:0001525);ameboidal-type cell migration(GO:0001667);endocytosis(GO:0006897);positive regulation of lamellipodium assembly(GO:0010592);Rac protein signal transduction(GO:0016601);lamellipodium assembly(GO:0030032);actin cytoskeleton organization(GO:0030036);actin filament-based movement(GO:0030048);megakaryocyte development(GO:0035855);cell motility(GO:0048870);negative regulation o…	ruffle(GO:0001726);intracellular anatomical structure(GO:0005622);cytoplasm(GO:0005737);early endosome(GO:0005769);cytoskeleton(GO:0005856);plasma membrane(GO:0005886);cell-cell junction(GO:0005911);membrane(GO:0016020);lamellipodium(GO:0030027);SCAR complex(GO:0031209);protein-containing complex(GO:0032991);cell projection(GO:0042995);synapse(GO:0045202)	Signaling by Rho GTPases;RHO GTPase Effectors;Signaling by Receptor Tyrosine Kinases;RAC3 GTPase cycle;RHO GTPases Activate WASPs and WAVEs;RAC1 GTPase cycle;Regulation of actin dynamics for phagocytic cup formation;Immune System;Fcgamma receptor (FCGR) dependent phagocytosis;RAC2 GTPase cycle;RHO GTPase cycle;Signaling by VEGF;Innate Immune System;VEGFA-VEGFR2 Pathway;Signal Transduction;Signali…					Mus musculus
MOUSE|MGI=MGI=109569|UniProtKB=Q6ZPF4	Q6ZPF4	Formin-like protein 3;Fmnl3;PTN000575460;orthologs	FORMIN-LIKE PROTEIN 3 (PTHR45857:SF3)	actin filament binding(GO:0051015)	cortical actin cytoskeleton organization(GO:0030866);regulation of cell shape(GO:0008360);cell migration(GO:0016477)	cytosol(GO:0005829)			actin binding(GO:0003779);protein binding(GO:0005515);small GTPase binding(GO:0031267);GTPase activating protein binding(GO:0032794);actin filament binding(GO:0051015)	angiogenesis(GO:0001525);cytoskeleton organization(GO:0007010);multicellular organism development(GO:0007275);regulation of cell shape(GO:0008360);cellular component organization(GO:0016043);cell migration(GO:0016477);regulation of cell morphogenesis(GO:0022604);actin cytoskeleton organization(GO:0030036);cortical actin cytoskeleton organization(GO:0030866);filopodium assembly(GO:0046847)	cytoplasm(GO:0005737);Golgi apparatus(GO:0005794);cytosol(GO:0005829);plasma membrane(GO:0005886);membrane(GO:0016020);intracellular membrane-bounded organelle(GO:0043231)	RHO GTPase cycle;RHOC GTPase cycle;RHO GTPase Effectors;Signaling by Rho GTPases, Miro GTPases and RHOBTB3;Signal Transduction;Signaling by Rho GTPases;RHOA GTPase cycle;RHO GTPases Activate Formins					Mus musculus
MOUSE|MGI=MGI=109194|UniProtKB=P68510	P68510	14-3-3 protein eta;Ywhah;PTN000428972;orthologs	14-3-3 PROTEIN ETA (PTHR18860:SF16)		signal transduction(GO:0007165)	cytoplasm(GO:0005737)	scaffold/adaptor protein(PC00226)	FGF signaling pathway->14-3-3;;EGF receptor signaling pathway->14-3-3;;Parkinson disease->14-3-3;;;;	actin binding(GO:0003779);protein binding(GO:0005515);sodium channel regulator activity(GO:0017080);enzyme binding(GO:0019899);protein domain specific binding(GO:0019904);nuclear glucocorticoid receptor binding(GO:0035259);identical protein binding(GO:0042802);transmembrane transporter binding(GO:0044325);protein heterodimerization activity(GO:0046982)	regulation of sodium ion transport(GO:0002028);glucocorticoid catabolic process(GO:0006713);intracellular protein transport(GO:0006886);cytoskeleton organization(GO:0007010);regulation of mitotic nuclear division(GO:0007088);signal transduction(GO:0007165);glucocorticoid receptor signaling pathway(GO:0042921);negative regulation of apoptotic process(GO:0043066);positive regulation of DNA-template…	cytoplasm(GO:0005737);cytosol(GO:0005829);plasma membrane(GO:0005886);intercalated disc(GO:0014704);synapse(GO:0045202);presynapse(GO:0098793);glutamatergic synapse(GO:0098978);cerebellar granule cell to Purkinje cell synapse(GO:0150048)	Generic Transcription Pathway;Activation of BAD and translocation to mitochondria ;Programmed Cell Death;Gene expression (Transcription);RHO GTPases activate PKNs;Signal Transduction;G2/M DNA damage checkpoint;Transcriptional Regulation by TP53;Intrinsic Pathway for Apoptosis;RNA Polymerase II Transcription;Signaling by Rho GTPases, Miro GTPases and RHOBTB3;Apoptosis;G2/M Checkpoints;Chk1/Chk2(Cd…					Mus musculus
MOUSE|MGI=MGI=2443626|UniProtKB=Q8R307	Q8R307	Vacuolar protein sorting-associated protein 18 homolog;Vps18;PTN000595194;orthologs	VACUOLAR PROTEIN SORTING-ASSOCIATED PROTEIN 18 HOMOLOG (PTHR23323:SF26)	protein-macromolecule adaptor activity(GO:0030674)	organelle localization(GO:0051640);organelle fusion(GO:0048284);endosome organization(GO:0007032);exocytic process(GO:0140029);vacuole organization(GO:0007033)	membrane protein complex(GO:0098796);endosome(GO:0005768);vesicle tethering complex(GO:0099023)	membrane trafficking regulatory protein(PC00151)		actin binding(GO:0003779);protein binding(GO:0005515);syntaxin binding(GO:0019905);protein-macromolecule adaptor activity(GO:0030674);metal ion binding(GO:0046872);ubiquitin protein ligase activity(GO:0061630)	intracellular protein transport(GO:0006886);vesicle docking involved in exocytosis(GO:0006904);autophagy(GO:0006914);endosome organization(GO:0007032);lysosome organization(GO:0007040);endosome to lysosome transport(GO:0008333);protein transport(GO:0015031);vesicle-mediated transport(GO:0016192);protein ubiquitination(GO:0016567);negative regulation of intracellular estrogen receptor signaling pa…	lysosome(GO:0005764);endosome(GO:0005768);early endosome(GO:0005769);late endosome(GO:0005770);actin filament(GO:0005884);membrane(GO:0016020);AP-3 adaptor complex(GO:0030123);HOPS complex(GO:0030897);cytoplasmic vesicle(GO:0031410);CORVET complex(GO:0033263);presynapse(GO:0098793);glutamatergic synapse(GO:0098978)						Mus musculus
MOUSE|MGI=MGI=1355315|UniProtKB=Q9JHJ0	Q9JHJ0	Tropomodulin-3;Tmod3;PTN000096709;orthologs	TROPOMODULIN-3 (PTHR10901:SF18)	cytoskeletal protein binding(GO:0008092)	myofibril assembly(GO:0030239);muscle contraction(GO:0006936);actin filament organization(GO:0007015)	actin cytoskeleton(GO:0015629);sarcomere(GO:0030017)	actin or actin-binding cytoskeletal protein(PC00041)		actin binding(GO:0003779);protein binding(GO:0005515);tropomyosin binding(GO:0005523);microtubule minus-end binding(GO:0051011)	muscle contraction(GO:0006936);actin filament organization(GO:0007015);actin cytoskeleton organization(GO:0030036);myofibril assembly(GO:0030239);mitotic cell cycle phase transition(GO:0044772);erythrocyte development(GO:0048821);cell motility(GO:0048870);pointed-end actin filament capping(GO:0051694);positive regulation of mitotic cell cycle phase transition(GO:1901992)	ruffle(GO:0001726);cytoplasm(GO:0005737);cytoskeleton(GO:0005856);striated muscle thin filament(GO:0005865);myofibril(GO:0030016);lamellipodium(GO:0030027);filamentous actin(GO:0031941)	Signaling by Rho GTPases;RHOBTB2 GTPase cycle;Muscle contraction;RND3 GTPase cycle;RHO GTPase cycle;Striated Muscle Contraction;Signal Transduction;RHOBTB GTPase Cycle;Signaling by Rho GTPases, Miro GTPases and RHOBTB3					Mus musculus
MOUSE|MGI=MGI=1349410|UniProtKB=Q99KW3	Q99KW3	TRIO and F-actin-binding protein;Triobp;PTN000425566;orthologs	TRIO AND F-ACTIN-BINDING PROTEIN (PTHR17271:SF10)	actin filament binding(GO:0051015)	positive regulation of cell-substrate adhesion(GO:0010811)	actin cytoskeleton(GO:0015629)	actin or actin-binding cytoskeletal protein(PC00041)		actin binding(GO:0003779);protein binding(GO:0005515);ubiquitin protein ligase binding(GO:0031625);actin filament binding(GO:0051015)	cell cycle(GO:0007049);sensory perception of sound(GO:0007605);cell division(GO:0051301);auditory receptor cell stereocilium organization(GO:0060088);positive regulation of substrate adhesion-dependent cell spreading(GO:1900026)	nucleus(GO:0005634);cytoplasm(GO:0005737);cytosol(GO:0005829);cytoskeleton(GO:0005856);actin cytoskeleton(GO:0015629);cell projection(GO:0042995);stereocilium base(GO:0120044)						Mus musculus
MOUSE|MGI=MGI=2679008|UniProtKB=Q6P9Q4	Q6P9Q4	FH1_FH2 domain-containing protein 1;Fhod1;PTN000575151;orthologs	FH1_FH2 DOMAIN-CONTAINING PROTEIN 1 (PTHR45920:SF2)	actin filament binding(GO:0051015)	cortical actin cytoskeleton organization(GO:0030866)	cytoskeleton(GO:0005856);cytoplasm(GO:0005737)			actin binding(GO:0003779);protein domain specific binding(GO:0019904);identical protein binding(GO:0042802);protein self-association(GO:0043621);actin filament binding(GO:0051015)	nuclear migration(GO:0007097);cortical actin cytoskeleton organization(GO:0030866);positive regulation of transcription by RNA polymerase II(GO:0045944);regulation of stress fiber assembly(GO:0051492);positive regulation of stress fiber assembly(GO:0051496);establishment of centrosome localization(GO:0051660)	stress fiber(GO:0001725);nucleus(GO:0005634);nucleoplasm(GO:0005654);cytoplasm(GO:0005737);cytosol(GO:0005829);cytoskeleton(GO:0005856);intercalated disc(GO:0014704);cell projection(GO:0042995)						Mus musculus
MOUSE|MGI=MGI=1927489|UniProtKB=Q8CI51	Q8CI51	PDZ and LIM domain protein 5;Pdlim5;PTN000655227;orthologs	PDZ AND LIM DOMAIN PROTEIN 5 (PTHR24214:SF32)	actin binding(GO:0003779)	heart development(GO:0007507);muscle structure development(GO:0061061);actin cytoskeleton organization(GO:0030036)	Z disc(GO:0030018);adherens junction(GO:0005912);stress fiber(GO:0001725);protein-containing complex(GO:0032991);actin filament(GO:0005884)	actin or actin-binding cytoskeletal protein(PC00041)		actin binding(GO:0003779);protein kinase C binding(GO:0005080);protein binding(GO:0005515);actinin binding(GO:0042805);metal ion binding(GO:0046872);muscle alpha-actinin binding(GO:0051371)	heart development(GO:0007507);actin cytoskeleton organization(GO:0030036);regulation of synapse assembly(GO:0051963);regulation of dendritic spine morphogenesis(GO:0061001);cell growth involved in cardiac muscle cell development(GO:0061049);muscle structure development(GO:0061061)	stress fiber(GO:0001725);cytoplasm(GO:0005737);cytosol(GO:0005829);adherens junction(GO:0005912);postsynaptic density(GO:0014069);actin cytoskeleton(GO:0015629);membrane(GO:0016020);Z disc(GO:0030018);filamentous actin(GO:0031941);cell projection(GO:0042995);synapse(GO:0045202)						Mus musculus
MOUSE|MGI=MGI=1351615|UniProtKB=Q9QYB5	Q9QYB5	Gamma-adducin;Add3;PTN000072578;orthologs	GAMMA-ADDUCIN (PTHR10672:SF5)	actin filament binding(GO:0051015)	barbed-end actin filament capping(GO:0051016)	postsynaptic density(GO:0014069);cytoskeleton(GO:0005856);plasma membrane(GO:0005886)	non-motor actin binding protein(PC00165)		actin binding(GO:0003779);protein kinase C binding(GO:0005080);structural constituent of cytoskeleton(GO:0005200);calmodulin binding(GO:0005516);actin filament binding(GO:0051015)	response to xenobiotic stimulus(GO:0009410);positive regulation of vasoconstriction(GO:0045907);barbed-end actin filament capping(GO:0051016);positive regulation of cytoskeleton organization(GO:0051495)	condensed nuclear chromosome(GO:0000794);cytoplasm(GO:0005737);cytoskeleton(GO:0005856);plasma membrane(GO:0005886);brush border(GO:0005903);cell-cell junction(GO:0005911);cell cortex(GO:0005938);postsynaptic density(GO:0014069);membrane(GO:0016020)	RHO GTPase cycle;Transport of small molecules;RHOD GTPase cycle;Signaling by Rho GTPases, Miro GTPases and RHOBTB3;Signal Transduction;Miscellaneous transport and binding events;Signaling by Rho GTPases;RHOF GTPase cycle					Mus musculus
MOUSE|MGI=MGI=2140327|UniProtKB=Q501J7	Q501J7	Phosphatase and actin regulator 4;Phactr4;PTN000297694;orthologs	PHOSPHATASE AND ACTIN REGULATOR 4 (PTHR12751:SF4)	actin binding(GO:0003779)	neural crest cell migration(GO:0001755);actin cytoskeleton organization(GO:0030036)		phosphatase modulator(PC00184)		actin binding(GO:0003779);protein phosphatase inhibitor activity(GO:0004864);protein phosphatase 1 binding(GO:0008157);protein phosphatase activator activity(GO:0072542)	neural crest cell migration(GO:0001755);neural tube closure(GO:0001843);Rho protein signal transduction(GO:0007266);multicellular organism development(GO:0007275);nervous system development(GO:0007399);actin cytoskeleton organization(GO:0030036);positive regulation of catalytic activity(GO:0043085);enteric nervous system development(GO:0048484);regulation of cell cycle(GO:0051726);closure of opti…	cytoplasm(GO:0005737);lamellipodium(GO:0030027);cell projection(GO:0042995)						Mus musculus
MOUSE|MGI=MGI=101757|UniProtKB=P18760	P18760	Cofilin-1;Cfl1;PTN000227309;orthologs	COFILIN-1 (PTHR11913:SF17)	actin filament binding(GO:0051015)	actin filament depolymerization(GO:0030042)	actin cortical patch(GO:0030479)	non-motor actin binding protein(PC00165)	Cytoskeletal regulation by Rho GTPase->Cofilin;;	actin binding(GO:0003779);signaling receptor binding(GO:0005102);protein binding(GO:0005515);protein phosphatase binding(GO:0019903);actin filament binding(GO:0051015);phosphatidylinositol bisphosphate binding(GO:1902936)	mitotic cytokinesis(GO:0000281);neural crest cell migration(GO:0001755);neural fold formation(GO:0001842);protein phosphorylation(GO:0006468);protein import into nucleus(GO:0006606);cytoskeleton organization(GO:0007010);actin filament organization(GO:0007015);negative regulation of cell adhesion(GO:0007162);positive regulation of lamellipodium assembly(GO:0010592);negative regulation of lamellipo…	extracellular region(GO:0005576);nucleus(GO:0005634);cytoplasm(GO:0005737);cytosol(GO:0005829);cytoskeleton(GO:0005856);plasma membrane(GO:0005886);cell-cell junction(GO:0005911);focal adhesion(GO:0005925);actin cytoskeleton(GO:0015629);membrane(GO:0016020);lamellipodium(GO:0030027);filopodium(GO:0030175);growth cone(GO:0030426);cortical actin cytoskeleton(GO:0030864);cell leading edge(GO:0031252…						Mus musculus
MOUSE|MGI=MGI=1345964|UniProtKB=Q9WUM4	Q9WUM4	Coronin-1C;Coro1c;PTN000091893;orthologs	CORONIN-1C (PTHR10856:SF10)	actin filament binding(GO:0051015)	neural crest cell migration(GO:0001755);actin filament organization(GO:0007015)		non-motor actin binding protein(PC00165)		actin binding(GO:0003779);small GTPase binding(GO:0031267);actin filament binding(GO:0051015)	actin cortical patch assembly(GO:0000147);neural crest cell migration(GO:0001755);regulation of protein phosphorylation(GO:0001932);negative regulation of protein phosphorylation(GO:0001933);phagocytosis(GO:0006909);actin filament organization(GO:0007015);regulation of epithelial cell migration(GO:0010632);negative regulation of epithelial cell migration(GO:0010633);regulation of fibroblast migra…	cytoplasm(GO:0005737);endosome(GO:0005768);cytoskeleton(GO:0005856);plasma membrane(GO:0005886);endosome membrane(GO:0010008);actin cytoskeleton(GO:0015629);membrane(GO:0016020);lateral plasma membrane(GO:0016328);flotillin complex(GO:0016600);lamellipodium(GO:0030027);vesicle(GO:0031982);cell projection(GO:0042995)						Mus musculus
MOUSE|MGI=MGI=1201785|UniProtKB=P97808	P97808	FXYD domain-containing ion transport regulator 5;Fxyd5;PTN000373858;orthologs	FXYD DOMAIN-CONTAINING ION TRANSPORT REGULATOR 5 (PTHR14132:SF14)	channel regulator activity(GO:0016247)	regulation of sodium ion transmembrane transporter activity(GO:2000649)		primary active transporter(PC00068)		actin binding(GO:0003779);sodium channel regulator activity(GO:0017080);cadherin binding(GO:0045296);ion channel regulator activity(GO:0099106)	monoatomic ion transport(GO:0006811);monoatomic ion transmembrane transport(GO:0034220);regulation of monoatomic ion transport(GO:0043269);regulation of sodium ion transmembrane transporter activity(GO:2000649)	membrane(GO:0016020)						Mus musculus
MOUSE|MGI=MGI=1915021|UniProtKB=Q9CPW4	Q9CPW4	Actin-related protein 2_3 complex subunit 5;Arpc5;PTN000291152;orthologs	ACTIN-RELATED PROTEIN 2_3 COMPLEX SUBUNIT 5 (PTHR12644:SF1)	actin filament binding(GO:0051015)	Arp2/3 complex-mediated actin nucleation(GO:0034314);cell migration(GO:0016477)	cytoplasm(GO:0005737);Arp2/3 protein complex(GO:0005885)	actin or actin-binding cytoskeletal protein(PC00041)	Inflammation mediated by chemokine and cytokine signaling pathway->Actin related protein 2/3 complex;;Integrin signalling pathway->Actin related protein 2/3 complex;;Cytoskeletal regulation by Rho GTPase->Actin related protein 2/3 complex;;Huntington disease->Actin related protein 2/3 complex;;;;;	actin binding(GO:0003779);structural constituent of cytoskeleton(GO:0005200);actin filament binding(GO:0051015)	smooth muscle cell migration(GO:0014909);cell migration(GO:0016477);maintenance of cell polarity(GO:0030011);regulation of actin filament polymerization(GO:0030833);Arp2/3 complex-mediated actin nucleation(GO:0034314);actin filament network formation(GO:0051639);microtubule organizing center localization(GO:0061842);lamellipodium organization(GO:0097581)	nucleus(GO:0005634);cytoplasm(GO:0005737);endosome(GO:0005768);cytoskeleton(GO:0005856);Arp2/3 protein complex(GO:0005885);actin cytoskeleton(GO:0015629);lamellipodium(GO:0030027);growth cone(GO:0030426);cell projection(GO:0042995)	Innate Immune System;Developmental Biology;Nervous system development;Axon guidance;Signal Transduction;Immune System;Regulation of actin dynamics for phagocytic cup formation;Fcgamma receptor (FCGR) dependent phagocytosis;Vesicle-mediated transport;Signaling by Rho GTPases, Miro GTPases and RHOBTB3;Clathrin-mediated endocytosis;EPH-Ephrin signaling;RHO GTPases Activate WASPs and WAVEs;Neutrophil…					Mus musculus
MOUSE|MGI=MGI=87918|UniProtKB=Q9QYC0	Q9QYC0	Alpha-adducin;Add1;PTN000072630;orthologs	ALPHA-ADDUCIN (PTHR10672:SF4)	actin filament binding(GO:0051015)	barbed-end actin filament capping(GO:0051016);regulation of epithelial cell differentiation(GO:0030856);positive regulation of cellular component organization(GO:0051130);positive regulation of cell development(GO:0010720)	postsynaptic density(GO:0014069);adherens junction(GO:0005912);cytoskeleton(GO:0005856);focal adhesion(GO:0005925);plasma membrane(GO:0005886)	non-motor actin binding protein(PC00165)		actin binding(GO:0003779);structural constituent of cytoskeleton(GO:0005200);calmodulin binding(GO:0005516);spectrin binding(GO:0030507);T cell receptor binding(GO:0042608);protein homodimerization activity(GO:0042803);protein heterodimerization activity(GO:0046982);protein dimerization activity(GO:0046983);actin filament binding(GO:0051015);RNA polymerase II-specific DNA-binding transcription fa…	cell morphogenesis(GO:0000902);in utero embryonic development(GO:0001701);cell volume homeostasis(GO:0006884);hemoglobin metabolic process(GO:0020027);erythrocyte differentiation(GO:0030218);negative regulation of actin filament polymerization(GO:0030837);positive regulation of protein binding(GO:0032092);multicellular organism growth(GO:0035264);positive regulation of angiogenesis(GO:0045766);po…	nucleus(GO:0005634);nucleoplasm(GO:0005654);cytoplasm(GO:0005737);cytoskeleton(GO:0005856);plasma membrane(GO:0005886);adherens junction(GO:0005912);F-actin capping protein complex(GO:0008290);postsynaptic density(GO:0014069);membrane(GO:0016020);nuclear body(GO:0016604);dendrite(GO:0030425);dendritic spine(GO:0043197);perinuclear region of cytoplasm(GO:0048471)	Transport of small molecules;Apoptotic execution phase;Apoptosis;Miscellaneous transport and binding events;Caspase-mediated cleavage of cytoskeletal proteins;Apoptotic cleavage of cellular proteins;Programmed Cell Death					Mus musculus
MOUSE|MGI=MGI=1915339|UniProtKB=P59999	P59999	Actin-related protein 2_3 complex subunit 4;Arpc4;PTN000505014;orthologs	ACTIN-RELATED PROTEIN 2_3 COMPLEX SUBUNIT 4 (PTHR22629:SF0)	actin filament binding(GO:0051015)	Arp2/3 complex-mediated actin nucleation(GO:0034314)	Arp2/3 protein complex(GO:0005885)	actin or actin-binding cytoskeletal protein(PC00041)	Inflammation mediated by chemokine and cytokine signaling pathway->Actin related protein 2/3 complex;;Cytoskeletal regulation by Rho GTPase->Actin related protein 2/3 complex;;;	actin binding(GO:0003779);structural constituent of cytoskeleton(GO:0005200);enzyme binding(GO:0019899);protein-macromolecule adaptor activity(GO:0030674);actin filament binding(GO:0051015)	actin filament polymerization(GO:0030041);Arp2/3 complex-mediated actin nucleation(GO:0034314)	nucleus(GO:0005634);cytoplasm(GO:0005737);cytoskeleton(GO:0005856);Arp2/3 protein complex(GO:0005885);actin cytoskeleton(GO:0015629);cell projection(GO:0042995)	Signaling by Rho GTPases;Developmental Biology;RHO GTPase Effectors;EPHB-mediated forward signaling;EPH-Ephrin signaling;RHO GTPases Activate WASPs and WAVEs;Axon guidance;Clathrin-mediated endocytosis;Membrane Trafficking;Vesicle-mediated transport;Regulation of actin dynamics for phagocytic cup formation;Immune System;Fcgamma receptor (FCGR) dependent phagocytosis;Nervous system development;Inn…					Mus musculus
MOUSE|MGI=MGI=1928375|UniProtKB=Q9JM76	Q9JM76	Actin-related protein 2_3 complex subunit 3;Arpc3;PTN000273446;orthologs	ACTIN-RELATED PROTEIN 2_3 COMPLEX SUBUNIT 3 (PTHR12391:SF10)	actin filament binding(GO:0051015)	Arp2/3 complex-mediated actin nucleation(GO:0034314)	Arp2/3 protein complex(GO:0005885)	actin or actin-binding cytoskeletal protein(PC00041)	Inflammation mediated by chemokine and cytokine signaling pathway->Actin related protein 2/3 complex;;Integrin signalling pathway->Actin related protein 2/3 complex;;Cytoskeletal regulation by Rho GTPase->Actin related protein 2/3 complex;;;;	actin binding(GO:0003779);structural constituent of cytoskeleton(GO:0005200);protein binding(GO:0005515);actin filament binding(GO:0051015)	regulation of actin filament polymerization(GO:0030833);Arp2/3 complex-mediated actin nucleation(GO:0034314)	nucleus(GO:0005634);cytoplasm(GO:0005737);cytoskeleton(GO:0005856);Arp2/3 protein complex(GO:0005885);lamellipodium(GO:0030027);cell leading edge(GO:0031252);filamentous actin(GO:0031941);cell projection(GO:0042995);growth cone leading edge(GO:0061850)	Signaling by Rho GTPases;Developmental Biology;RHO GTPase Effectors;EPHB-mediated forward signaling;EPH-Ephrin signaling;RHO GTPases Activate WASPs and WAVEs;Axon guidance;Clathrin-mediated endocytosis;Membrane Trafficking;Vesicle-mediated transport;Regulation of actin dynamics for phagocytic cup formation;Immune System;Fcgamma receptor (FCGR) dependent phagocytosis;Nervous system development;Inn…					Mus musculus
MOUSE|MGI=MGI=98387|UniProtKB=P15508	P15508	Spectrin beta chain, erythrocytic;Sptb;PTN000748049;orthologs	SPECTRIN BETA CHAIN, ERYTHROCYTIC (PTHR11915:SF248)	actin filament binding(GO:0051015)	actin cytoskeleton organization(GO:0030036)	cell junction(GO:0030054);cell projection(GO:0042995);cortical actin cytoskeleton(GO:0030864);plasma membrane(GO:0005886)	actin or actin-binding cytoskeletal protein(PC00041)		actin binding(GO:0003779);structural constituent of cytoskeleton(GO:0005200);protein binding(GO:0005515);ankyrin binding(GO:0030506);actin filament binding(GO:0051015)	porphyrin-containing compound biosynthetic process(GO:0006779);plasma membrane organization(GO:0007009);actin cytoskeleton organization(GO:0030036);hemopoiesis(GO:0030097);actin filament capping(GO:0051693);modification of postsynaptic actin cytoskeleton(GO:0098885)	cytoplasm(GO:0005737);cytosol(GO:0005829);cytoskeleton(GO:0005856);plasma membrane(GO:0005886);spectrin(GO:0008091);cell surface(GO:0009986);spectrin-associated cytoskeleton(GO:0014731);membrane(GO:0016020);cell junction(GO:0030054);cortical cytoskeleton(GO:0030863);cortical actin cytoskeleton(GO:0030864);protein-containing complex(GO:0032991);cell projection(GO:0042995);postsynapse(GO:0098794);g…	MAPK family signaling cascades;Metabolism of proteins;Developmental Biology;Transport to the Golgi and subsequent modification;Nervous system development;Axon guidance;Signal Transduction;COPI-mediated anterograde transport;Interaction between L1 and Ankyrins;Vesicle-mediated transport;MAPK1/MAPK3 signaling;Asparagine N-linked glycosylation;NCAM signaling for neurite out-growth;Post-translational…					Mus musculus
MOUSE|MGI=MGI=98388|UniProtKB=Q62261	Q62261	Spectrin beta chain, non-erythrocytic 1;Sptbn1;PTN000748121;orthologs	SPECTRIN BETA CHAIN, NON-ERYTHROCYTIC 1 (PTHR11915:SF226)	actin filament binding(GO:0051015)	actin cytoskeleton organization(GO:0030036);protein localization to plasma membrane(GO:0072659)	cell junction(GO:0030054);cell projection(GO:0042995);cortical actin cytoskeleton(GO:0030864);plasma membrane(GO:0005886)	actin or actin-binding cytoskeletal protein(PC00041)		actin binding(GO:0003779);structural constituent of cytoskeleton(GO:0005200);protein binding(GO:0005515);calmodulin binding(GO:0005516);phospholipid binding(GO:0005543);ankyrin binding(GO:0030506);protein-containing complex binding(GO:0044877);actin filament binding(GO:0051015);GTPase binding(GO:0051020)	mitotic cytokinesis(GO:0000281);plasma membrane organization(GO:0007009);central nervous system development(GO:0007417);central nervous system formation(GO:0021556);actin cytoskeleton organization(GO:0030036);positive regulation of interleukin-2 production(GO:0032743);Golgi to plasma membrane protein transport(GO:0043001);actin filament capping(GO:0051693);regulation of SMAD protein signal transd…	nucleus(GO:0005634);nucleolus(GO:0005730);cytoplasm(GO:0005737);cytosol(GO:0005829);cytoskeleton(GO:0005856);plasma membrane(GO:0005886);spectrin(GO:0008091);postsynaptic density(GO:0014069);membrane(GO:0016020);cell junction(GO:0030054);axolemma(GO:0030673);cortical cytoskeleton(GO:0030863);cortical actin cytoskeleton(GO:0030864);M band(GO:0031430);cuticular plate(GO:0032437);protein-containing …	RHOU GTPase cycle;MAPK family signaling cascades;Metabolism of proteins;Developmental Biology;Transport to the Golgi and subsequent modification;Nervous system development;Axon guidance;Signal Transduction;COPI-mediated anterograde transport;Interaction between L1 and Ankyrins;Vesicle-mediated transport;MAPK1/MAPK3 signaling;Signaling by Rho GTPases, Miro GTPases and RHOBTB3;Asparagine N-linked g…					Mus musculus
MOUSE|MGI=MGI=98809|UniProtKB=P58771	P58771	Tropomyosin alpha-1 chain;Tpm1;PTN000444063;orthologs	TROPOMYOSIN ALPHA-1 CHAIN (PTHR19269:SF80)	actin filament binding(GO:0051015)	muscle contraction(GO:0006936);actin filament organization(GO:0007015)	actin filament(GO:0005884)	actin binding motor protein(PC00040)		actin binding(GO:0003779);structural constituent of cytoskeleton(GO:0005200);protein binding(GO:0005515);cytoskeletal protein binding(GO:0008092);identical protein binding(GO:0042802);protein homodimerization activity(GO:0042803);protein heterodimerization activity(GO:0046982);actin filament binding(GO:0051015);disordered domain specific binding(GO:0097718)	in utero embryonic development(GO:0001701);positive regulation of heart rate by epinephrine(GO:0003065);actin filament organization(GO:0007015);regulation of cell shape(GO:0008360);embryo development(GO:0009790);muscle filament sliding(GO:0030049);negative regulation of cell migration(GO:0030336);ruffle organization(GO:0031529);wound healing(GO:0042060);sarcomere organization(GO:0045214);positive…	stress fiber(GO:0001725);cytoplasm(GO:0005737);cytosol(GO:0005829);cytoskeleton(GO:0005856);muscle thin filament tropomyosin(GO:0005862);actin filament(GO:0005884);actin cytoskeleton(GO:0015629);myofibril(GO:0030016);bleb(GO:0032059);ruffle membrane(GO:0032587);protein-containing complex(GO:0032991)	Muscle contraction;Smooth Muscle Contraction;Striated Muscle Contraction					Mus musculus
MOUSE|MGI=MGI=1923959|UniProtKB=Q9CVB6	Q9CVB6	Actin-related protein 2_3 complex subunit 2;Arpc2;PTN000248631;orthologs	ACTIN-RELATED PROTEIN 2_3 COMPLEX SUBUNIT 2 (PTHR12058:SF0)	actin filament binding(GO:0051015);structural constituent of cytoskeleton(GO:0005200)	Arp2/3 complex-mediated actin nucleation(GO:0034314)	Arp2/3 protein complex(GO:0005885)		Inflammation mediated by chemokine and cytokine signaling pathway->Actin related protein 2/3 complex;;Integrin signalling pathway->Actin related protein 2/3 complex;;Cytoskeletal regulation by Rho GTPase->Actin related protein 2/3 complex;;;;	actin binding(GO:0003779);structural constituent of cytoskeleton(GO:0005200);protein binding(GO:0005515);glutamate receptor binding(GO:0035254);protein-containing complex binding(GO:0044877);actin filament binding(GO:0051015);ATPase binding(GO:0051117)	positive regulation of lamellipodium assembly(GO:0010592);positive regulation of smooth muscle cell migration(GO:0014911);actin filament polymerization(GO:0030041);positive regulation of actin filament polymerization(GO:0030838);regulation of actin cytoskeleton organization(GO:0032956);Arp2/3 complex-mediated actin nucleation(GO:0034314);cellular response to platelet-derived growth factor stimulu…	nucleus(GO:0005634);nucleoplasm(GO:0005654);cytoplasm(GO:0005737);endosome(GO:0005768);cytoskeleton(GO:0005856);Arp2/3 protein complex(GO:0005885);plasma membrane(GO:0005886);focal adhesion(GO:0005925);cell surface(GO:0009986);actin cytoskeleton(GO:0015629);lamellipodium(GO:0030027);secretory granule(GO:0030141);growth cone(GO:0030426);cell leading edge(GO:0031252);filamentous actin(GO:0031941);r…	Signaling by Rho GTPases;Developmental Biology;RHO GTPase Effectors;EPHB-mediated forward signaling;EPH-Ephrin signaling;RHO GTPases Activate WASPs and WAVEs;Axon guidance;Clathrin-mediated endocytosis;Membrane Trafficking;Vesicle-mediated transport;Regulation of actin dynamics for phagocytic cup formation;Immune System;Fcgamma receptor (FCGR) dependent phagocytosis;Nervous system development;Inn…					Mus musculus
MOUSE|MGI=MGI=98810|UniProtKB=P58774	P58774	Tropomyosin beta chain;Tpm2;PTN000444030;orthologs	TROPOMYOSIN BETA CHAIN (PTHR19269:SF46)	actin filament binding(GO:0051015)	muscle contraction(GO:0006936);actin filament organization(GO:0007015)	actin filament(GO:0005884)	actin binding motor protein(PC00040)		actin binding(GO:0003779);structural constituent of cytoskeleton(GO:0005200);protein binding(GO:0005515);identical protein binding(GO:0042802);protein homodimerization activity(GO:0042803);protein heterodimerization activity(GO:0046982);actin filament binding(GO:0051015)	muscle contraction(GO:0006936);actin filament organization(GO:0007015);regulation of ATP-dependent activity(GO:0043462)	cytoplasm(GO:0005737);cytoskeleton(GO:0005856);muscle thin filament tropomyosin(GO:0005862);actin filament(GO:0005884);actin cytoskeleton(GO:0015629)	Muscle contraction;Smooth Muscle Contraction;Striated Muscle Contraction					Mus musculus
MOUSE|MGI=MGI=1343142|UniProtKB=Q9WV32	Q9WV32	Actin-related protein 2_3 complex subunit 1B;Arpc1b;PTN000076231;orthologs	ACTIN-RELATED PROTEIN 2_3 COMPLEX SUBUNIT 1B (PTHR10709:SF10)	actin filament binding(GO:0051015)	Arp2/3 complex-mediated actin nucleation(GO:0034314)	Arp2/3 protein complex(GO:0005885)	actin or actin-binding cytoskeletal protein(PC00041)	Inflammation mediated by chemokine and cytokine signaling pathway->Actin related protein 2/3 complex;;Integrin signalling pathway->Actin related protein 2/3 complex;;Cytoskeletal regulation by Rho GTPase->Actin related protein 2/3 complex;;Huntington disease->Actin related protein 2/3 complex;;;;;	actin binding(GO:0003779);structural constituent of cytoskeleton(GO:0005200);protein-containing complex binding(GO:0044877);actin filament binding(GO:0051015)	Arp2/3 complex-mediated actin nucleation(GO:0034314)	nucleus(GO:0005634);cytoplasm(GO:0005737);cytoskeleton(GO:0005856);Arp2/3 protein complex(GO:0005885);actin cytoskeleton(GO:0015629);tubulobulbar complex(GO:0036284)	Signaling by Rho GTPases;Developmental Biology;RHO GTPase Effectors;EPHB-mediated forward signaling;EPH-Ephrin signaling;RHO GTPases Activate WASPs and WAVEs;Axon guidance;Regulation of actin dynamics for phagocytic cup formation;Immune System;Fcgamma receptor (FCGR) dependent phagocytosis;Nervous system development;Innate Immune System;Signal Transduction;Signaling by Rho GTPases, Miro GTPases a…					Mus musculus
MOUSE|MGI=MGI=108559|UniProtKB=Q9QXZ0	Q9QXZ0	Microtubule-actin cross-linking factor 1, isoforms 1_2_3_4;Macf1;PTN000747881;orthologs	MICROTUBULE-ACTIN CROSS-LINKING FACTOR 1, ISOFORMS 1_2_3_4_5 (PTHR23169:SF25)	cadherin binding(GO:0045296)	wound healing(GO:0042060);regulation of cell-matrix adhesion(GO:0001952);intermediate filament cytoskeleton organization(GO:0045104);regulation of cell junction assembly(GO:1901888);regulation of microtubule-based process(GO:0032886)	cytoplasm(GO:0005737);membrane(GO:0016020);actin cytoskeleton(GO:0015629);intermediate filament(GO:0005882);microtubule(GO:0005874)	intermediate filament binding protein(PC00130)		actin binding(GO:0003779);structural molecule activity(GO:0005198);calcium ion binding(GO:0005509);protein binding(GO:0005515);microtubule binding(GO:0008017);ATP hydrolysis activity(GO:0016887);metal ion binding(GO:0046872);microtubule minus-end binding(GO:0051011);actin filament binding(GO:0051015)	mesoderm formation(GO:0001707);post-translational protein targeting to endoplasmic reticulum membrane(GO:0006620);establishment or maintenance of cell polarity(GO:0007163);protein localization(GO:0008104);regulation of epithelial cell migration(GO:0010632);Wnt signaling pathway(GO:0016055);cell migration(GO:0016477);positive regulation of Wnt signaling pathway(GO:0030177);regulation of cell migra…	cytoplasm(GO:0005737);Golgi apparatus(GO:0005794);cytoskeleton(GO:0005856);microtubule(GO:0005874);intermediate filament(GO:0005882);plasma membrane(GO:0005886);cell cortex(GO:0005938);postsynaptic density(GO:0014069);actin cytoskeleton(GO:0015629);microtubule cytoskeleton(GO:0015630);membrane(GO:0016020);ruffle membrane(GO:0032587);cell projection(GO:0042995)						Mus musculus
MOUSE|MGI=MGI=103009|UniProtKB=O70318	O70318	Band 4.1-like protein 2;Epb41l2;PTN000589757;orthologs	BAND 4.1-LIKE PROTEIN 2 (PTHR23280:SF17)			plasma membrane(GO:0005886)	non-motor actin binding protein(PC00165)	Dopamine receptor mediated signaling pathway->erythrocyte membrane protein band 4.1-like 2;;Nicotine pharmacodynamics pathway->Erythrocyte membrane protein band 4.1-like 2;;Dopamine receptor mediated signaling pathway->erythrocyte membrane protein band 4.1;;;;	actin binding(GO:0003779);structural molecule activity(GO:0005198);protein binding(GO:0005515);cytoskeletal protein binding(GO:0008092);spectrin binding(GO:0030507);PH domain binding(GO:0042731)	cell cycle(GO:0007049);regulation of cell shape(GO:0008360);actin cytoskeleton organization(GO:0030036);cortical actin cytoskeleton organization(GO:0030866);actomyosin structure organization(GO:0031032);cell division(GO:0051301);positive regulation of protein localization to cell cortex(GO:1904778)	nucleoplasm(GO:0005654);cytoplasm(GO:0005737);cytoskeleton(GO:0005856);plasma membrane(GO:0005886);cell cortex(GO:0005938);COP9 signalosome(GO:0008180);actin cytoskeleton(GO:0015629);membrane(GO:0016020);cell junction(GO:0030054)	Protein-protein interactions at synapses;Neurexins and neuroligins;Neuronal System					Mus musculus
MOUSE|MGI=MGI=95401|UniProtKB=P48193	P48193	Protein 4.1;Epb41;PTN000589812;orthologs	PROTEIN 4.1 (PTHR23280:SF12)			plasma membrane(GO:0005886)	non-motor actin binding protein(PC00165)	Nicotine pharmacodynamics pathway->Erythrocyte membrane protein band 4.1;;Dopamine receptor mediated signaling pathway->erythrocyte membrane protein band 4.1;;;	actin binding(GO:0003779);structural molecule activity(GO:0005198);structural constituent of cytoskeleton(GO:0005200);protein binding(GO:0005515);calmodulin binding(GO:0005516);1-phosphatidylinositol binding(GO:0005545);cytoskeletal protein binding(GO:0008092);spectrin binding(GO:0030507);phosphoprotein binding(GO:0051219)	cell cycle(GO:0007049);regulation of cell shape(GO:0008360);actin cytoskeleton organization(GO:0030036);cortical actin cytoskeleton organization(GO:0030866);actomyosin structure organization(GO:0031032);positive regulation of protein binding(GO:0032092);cell division(GO:0051301);regulation of calcium ion transport(GO:0051924);protein-containing complex assembly(GO:0065003);regulation of intestina…	nucleus(GO:0005634);cytoplasm(GO:0005737);cytosol(GO:0005829);cytoskeleton(GO:0005856);plasma membrane(GO:0005886);cell cortex(GO:0005938);cytoplasmic side of plasma membrane(GO:0009898);actin cytoskeleton(GO:0015629);membrane(GO:0016020);basolateral plasma membrane(GO:0016323);nuclear body(GO:0016604);cell junction(GO:0030054);cortical cytoskeleton(GO:0030863);protein-containing complex(GO:00329…	Protein-protein interactions at synapses;Neurexins and neuroligins;Neuronal System					Mus musculus
MOUSE|MGI=MGI=103008|UniProtKB=Q9WV92	Q9WV92	Band 4.1-like protein 3;Epb41l3;PTN000589857;orthologs	BAND 4.1-LIKE PROTEIN 3 (PTHR23280:SF20)			plasma membrane(GO:0005886)	non-motor actin binding protein(PC00165)	Dopamine receptor mediated signaling pathway->erythrocyte membrane protein band 4.1;;	actin binding(GO:0003779);structural molecule activity(GO:0005198);structural constituent of cytoskeleton(GO:0005200);protein binding(GO:0005515);cytoskeletal protein binding(GO:0008092);cytoskeletal protein-membrane anchor activity(GO:0106006)	protein localization to paranode region of axon(GO:0002175);apoptotic process(GO:0006915);regulation of cell shape(GO:0008360);cortical cytoskeleton organization(GO:0030865);cortical actin cytoskeleton organization(GO:0030866);paranodal junction assembly(GO:0030913);actomyosin structure organization(GO:0031032);myelin maintenance(GO:0043217);neuron projection morphogenesis(GO:0048812);axon develo…	cytoplasm(GO:0005737);cytosol(GO:0005829);cytoskeleton(GO:0005856);plasma membrane(GO:0005886);cell-cell junction(GO:0005911);postsynaptic density(GO:0014069);membrane(GO:0016020);cell junction(GO:0030054);axolemma(GO:0030673);paranode region of axon(GO:0033270);juxtaparanode region of axon(GO:0044224);anchoring junction(GO:0070161)	Protein-protein interactions at synapses;Neurexins and neuroligins;Neuronal System					Mus musculus
MOUSE|MGI=MGI=3529431|UniProtKB=Q8CJ40	Q8CJ40	Rootletin;Crocc;PTN000570303;orthologs	ROOTLETIN (PTHR23159:SF17)			centrosome(GO:0005813);centriole(GO:0005814)	chromatin/chromatin-binding, or -regulatory protein(PC00077)		actin binding(GO:0003779);structural molecule activity(GO:0005198);structural constituent of cytoskeleton(GO:0005200);protein binding(GO:0005515);kinesin binding(GO:0019894)	cell cycle(GO:0007049);centrosome cycle(GO:0007098);protein localization(GO:0008104);centriole-centriole cohesion(GO:0010457);epithelial structure maintenance(GO:0010669);cellular homeostasis(GO:0019725);cell projection organization(GO:0030030);ciliary basal body organization(GO:0032053);protein localization to organelle(GO:0033365);photoreceptor cell maintenance(GO:0045494);positive regulation o…	photoreceptor inner segment(GO:0001917);cytoplasm(GO:0005737);centrosome(GO:0005813);centriole(GO:0005814);cytosol(GO:0005829);cytoskeleton(GO:0005856);plasma membrane(GO:0005886);cilium(GO:0005929);actin cytoskeleton(GO:0015629);ciliary rootlet(GO:0035253);cell projection(GO:0042995);9+2 motile cilium(GO:0097729);subapical part of cell(GO:0120219)						Mus musculus
MOUSE|MGI=MGI=1355335|UniProtKB=Q9JKK7	Q9JKK7	Tropomodulin-2;Tmod2;PTN000096735;orthologs	TROPOMODULIN-2 (PTHR10901:SF15)	cytoskeletal protein binding(GO:0008092)	myofibril assembly(GO:0030239);muscle contraction(GO:0006936);actin filament organization(GO:0007015)	actin cytoskeleton(GO:0015629);sarcomere(GO:0030017)	actin or actin-binding cytoskeletal protein(PC00041)		actin binding(GO:0003779);tropomyosin binding(GO:0005523)	muscle contraction(GO:0006936);actin filament organization(GO:0007015);neuron-neuron synaptic transmission(GO:0007270);learning or memory(GO:0007611);myofibril assembly(GO:0030239);positive regulation of G protein-coupled receptor signaling pathway(GO:0045745);pointed-end actin filament capping(GO:0051694)	cytoplasm(GO:0005737);cytoskeleton(GO:0005856);striated muscle thin filament(GO:0005865);myofibril(GO:0030016);growth cone(GO:0030426)	Muscle contraction;Striated Muscle Contraction					Mus musculus
MOUSE|MGI=MGI=1916017|UniProtKB=Q8VDD8	Q8VDD8	WASH complex subunit 1;Washc1;PTN000596223;orthologs	WAS PROTEIN FAMILY HOMOLOG 2-RELATED (PTHR23331:SF5)	alpha-tubulin binding(GO:0043014)	Arp2/3 complex-mediated actin nucleation(GO:0034314);retrograde transport, endosome to Golgi(GO:0042147);exocytosis(GO:0006887);endocytic recycling(GO:0032456)	early endosome(GO:0005769);protein-containing complex(GO:0032991);recycling endosome(GO:0055037)	membrane traffic protein(PC00150)		actin binding(GO:0003779);ubiquitin protein ligase binding(GO:0031625);alpha-tubulin binding(GO:0043014);gamma-tubulin binding(GO:0043015);low-density lipoprotein particle receptor binding(GO:0050750);phosphatidylinositol 3-kinase inhibitor activity(GO:0141039)	oocyte maturation(GO:0001556);dendritic cell antigen processing and presentation(GO:0002468);exocytosis(GO:0006887);endosome organization(GO:0007032);negative regulation of autophagy(GO:0010507);endosomal transport(GO:0016197);regulation of actin filament polymerization(GO:0030833);regulation of protein ubiquitination(GO:0031396);endocytic recycling(GO:0032456);Arp2/3 complex-mediated actin nucle…	exocyst(GO:0000145);cytoplasm(GO:0005737);endosome(GO:0005768);early endosome(GO:0005769);late endosome(GO:0005770);autophagosome(GO:0005776);centrosome(GO:0005813);cytoskeleton(GO:0005856);membrane(GO:0016020);lamellipodium(GO:0030027);filopodium(GO:0030175);BLOC-1 complex(GO:0031083);cytoplasmic vesicle(GO:0031410);early endosome membrane(GO:0031901);recycling endosome(GO:0055037);WASH complex(…						Mus musculus
MOUSE|MGI=MGI=1891748|UniProtKB=Q4VC33	Q4VC33	E3 ubiquitin-protein transferase MAEA;Maea;PTN000255819;orthologs	E3 UBIQUITIN-PROTEIN TRANSFERASE MAEA (PTHR12170:SF2)	ubiquitin-protein transferase activity(GO:0004842)	proteasome-mediated ubiquitin-dependent protein catabolic process(GO:0043161)	nucleus(GO:0005634);ubiquitin ligase complex(GO:0000151);cytoplasm(GO:0005737)			actin binding(GO:0003779);ubiquitin-protein transferase activity(GO:0004842);transferase activity(GO:0016740);metal ion binding(GO:0046872);ubiquitin protein ligase activity(GO:0061630)	cytoskeleton organization(GO:0007010);cell cycle(GO:0007049);cell adhesion(GO:0007155);negative regulation of myeloid cell apoptotic process(GO:0033033);proteasome-mediated ubiquitin-dependent protein catabolic process(GO:0043161);erythrocyte maturation(GO:0043249);erythrocyte development(GO:0048821);enucleate erythrocyte development(GO:0048822);cell division(GO:0051301)	ubiquitin ligase complex(GO:0000151);nucleus(GO:0005634);nucleoplasm(GO:0005654);cytoplasm(GO:0005737);spindle(GO:0005819);actomyosin contractile ring(GO:0005826);cytoskeleton(GO:0005856);plasma membrane(GO:0005886);actin cytoskeleton(GO:0015629);membrane(GO:0016020);nuclear matrix(GO:0016363);GID complex(GO:0034657)						Mus musculus
MOUSE|MGI=MGI=2444855|UniProtKB=Q8VCK5	Q8VCK5	Kelch-like protein 20;Klhl20;PTN000697982;orthologs	KELCH-LIKE PROTEIN 20 (PTHR24412:SF451)				scaffold/adaptor protein(PC00226)	Apoptosis signaling pathway->Second mitochondria-derived activator of caspase;;	actin binding(GO:0003779);ubiquitin-protein transferase activity(GO:0004842);type II interferon binding(GO:0019964)	Golgi to endosome transport(GO:0006895);protein transport(GO:0015031);protein ubiquitination(GO:0016567);negative regulation of apoptotic process(GO:0043066);proteasome-mediated ubiquitin-dependent protein catabolic process(GO:0043161);protein K33-linked ubiquitination(GO:1990390)	nucleus(GO:0005634);cytoplasm(GO:0005737);Golgi apparatus(GO:0005794);trans-Golgi network(GO:0005802);cytosol(GO:0005829);PML body(GO:0016605);Cul3-RING ubiquitin ligase complex(GO:0031463);cell projection(GO:0042995)	Immune System;Class I MHC mediated antigen processing & presentation;Antigen processing: Ubiquitination & Proteasome degradation;Adaptive Immune System;Neddylation;Post-translational protein modification;Metabolism of proteins					Mus musculus
MOUSE|MGI=MGI=1330281|UniProtKB=Q9JLQ0	Q9JLQ0	CD2-associated protein;Cd2ap;PTN000366631;orthologs	CD2-ASSOCIATED PROTEIN (PTHR14167:SF23)		actin filament organization(GO:0007015);cell migration(GO:0016477)	cell leading edge(GO:0031252);cytoplasm(GO:0005737);vesicle(GO:0031982);plasma membrane(GO:0005886)	scaffold/adaptor protein(PC00226)		actin binding(GO:0003779);vascular endothelial growth factor receptor binding(GO:0005172);protein binding(GO:0005515);beta-catenin binding(GO:0008013);SH3 domain binding(GO:0017124);clathrin binding(GO:0030276);phosphatidylinositol 3-kinase regulatory subunit binding(GO:0036312);identical protein binding(GO:0042802);protein-containing complex binding(GO:0044877);cadherin binding(GO:0045296);actin…	immunological synapse formation(GO:0001771);kidney development(GO:0001822);liver development(GO:0001889);endothelium development(GO:0003158);protein phosphorylation(GO:0006468);lipid metabolic process(GO:0006629);apoptotic process(GO:0006915);inflammatory response(GO:0006954);response to oxidative stress(GO:0006979);actin filament organization(GO:0007015);cell cycle(GO:0007049);cell population pr…	fibrillar center(GO:0001650);ruffle(GO:0001726);podosome(GO:0002102);nuclear envelope lumen(GO:0005641);cytoplasm(GO:0005737);late endosome(GO:0005770);cytosol(GO:0005829);cytoskeleton(GO:0005856);actin filament(GO:0005884);plasma membrane(GO:0005886);cell-cell junction(GO:0005911);cell cortex(GO:0005938);endocytic vesicle(GO:0030139);axon(GO:0030424);dendrite(GO:0030425);growth cone(GO:0030426);…						Mus musculus
MOUSE|MGI=MGI=2183448|UniProtKB=Q920M5	Q920M5	Coronin-6;Coro6;PTN000091822;orthologs	CORONIN-6 (PTHR10856:SF23)	actin filament binding(GO:0051015)	actin filament organization(GO:0007015);cell migration(GO:0016477)		non-motor actin binding protein(PC00165)		actin filament binding(GO:0051015)	actin filament organization(GO:0007015);cell migration(GO:0016477)							Mus musculus
MOUSE|MGI=MGI=1312985|UniProtKB=Q9WVA4	Q9WVA4	Transgelin-2;Tagln2;PTN000437603;orthologs	TRANSGELIN-2 (PTHR47385:SF20)	actin filament binding(GO:0051015)	actin filament organization(GO:0007015)	actin cytoskeleton(GO:0015629)			actin filament binding(GO:0051015)	actin filament organization(GO:0007015);epithelial cell differentiation(GO:0030855)	actin cytoskeleton(GO:0015629)	Response to elevated platelet cytosolic Ca2+;Hemostasis;Platelet activation, signaling and aggregation;Platelet degranulation					Mus musculus
MOUSE|MGI=MGI=2676394|UniProtKB=Q3UZA1	Q3UZA1	CapZ-interacting protein;Rcsd1;PTN000494996;orthologs	CAPZ-INTERACTING PROTEIN (PTHR21669:SF2)	actin filament binding(GO:0051015)	skeletal muscle contraction(GO:0003009)	nucleus(GO:0005634)	scaffold/adaptor protein(PC00226)		actin filament binding(GO:0051015);phosphatidylinositol phosphate binding(GO:1901981);retromer complex binding(GO:1905394)	skeletal muscle contraction(GO:0003009);protein localization to endosome(GO:0036010);retrograde transport, endosome to Golgi(GO:0042147);cellular hyperosmotic response(GO:0071474)	cellular_component(GO:0005575);early endosome(GO:0005769);WASH complex(GO:0071203)						Mus musculus
MOUSE|MGI=MGI=109146|UniProtKB=Q6ZWY8	Q6ZWY8	Thymosin beta-10;Tmsb10;PTN000246291;orthologs	THYMOSIN BETA-10 (PTHR12021:SF10)	actin monomer binding(GO:0003785)	maintenance of location in cell(GO:0051651);negative regulation of actin filament polymerization(GO:0030837);protein localization(GO:0008104);regulation of cell migration(GO:0030334)	cytoplasm(GO:0005737)	actin or actin-binding cytoskeletal protein(PC00041)		actin monomer binding(GO:0003785)	actin cytoskeleton organization(GO:0030036);regulation of cell migration(GO:0030334);sequestering of actin monomers(GO:0042989)	cytoplasm(GO:0005737)						Mus musculus
MOUSE|MGI=MGI=2442894|UniProtKB=Q3UMF0	Q3UMF0	Cordon-bleu protein-like 1;Cobll1;PTN000489480;orthologs	CORDON-BLEU PROTEIN-LIKE 1 (PTHR21557:SF2)						actin monomer binding(GO:0003785)								Mus musculus
MOUSE|MGI=MGI=1928738|UniProtKB=Q9Z2Z6	Q9Z2Z6	Mitochondrial carnitine_acylcarnitine carrier protein;Slc25a20;PTN000641445;orthologs	MITOCHONDRIAL CARNITINE_ACYLCARNITINE CARRIER PROTEIN (PTHR45624:SF56)	quaternary ammonium group transmembrane transporter activity(GO:0015651)	quaternary ammonium group transport(GO:0015697);organic cation transport(GO:0015695);transmembrane transport(GO:0055085);mitochondrial transport(GO:0006839)	mitochondrial envelope(GO:0005740)	transporter(PC00227)		acyl carnitine transmembrane transporter activity(GO:0015227)	in utero embryonic development(GO:0001701);mitochondrial transport(GO:0006839);lipid transport(GO:0006869);carnitine transmembrane transport(GO:1902603)	mitochondrion(GO:0005739);mitochondrial envelope(GO:0005740);mitochondrial inner membrane(GO:0005743);cytosol(GO:0005829);membrane(GO:0016020)	Fatty acid metabolism;Metabolism of lipids;Metabolism;Carnitine metabolism					Mus musculus
MOUSE|MGI=MGI=1929242|UniProtKB=Q9JHI5	Q9JHI5	Isovaleryl-CoA dehydrogenase, mitochondrial;Ivd;PTN000098109;orthologs	COMPLEX I ASSEMBLY FACTOR ACAD9, MITOCHONDRIAL-RELATED (PTHR43884:SF12)	oxidoreductase activity, acting on the CH-CH group of donors(GO:0016627)			dehydrogenase(PC00092)		acyl-CoA dehydrogenase activity(GO:0003995);butyryl-CoA dehydrogenase activity(GO:0004085);isovaleryl-CoA dehydrogenase activity(GO:0008470);oxidoreductase activity(GO:0016491);oxidoreductase activity, acting on the CH-CH group of donors(GO:0016627);short-chain fatty acyl-CoA dehydrogenase activity(GO:0016937);identical protein binding(GO:0042802);flavin adenine dinucleotide binding(GO:0050660)	leucine catabolic process(GO:0006552);branched-chain amino acid catabolic process(GO:0009083);fatty acid beta-oxidation using acyl-CoA dehydrogenase(GO:0033539)	nucleoplasm(GO:0005654);mitochondrion(GO:0005739);mitochondrial matrix(GO:0005759);mitochondrial membrane(GO:0031966)	Branched-chain amino acid catabolism;Metabolism;Metabolism of amino acids and derivatives					Mus musculus
MOUSE|MGI=MGI=1914272|UniProtKB=Q8JZN5	Q8JZN5	Complex I assembly factor ACAD9, mitochondrial;Acad9;PTN000098173;orthologs	COMPLEX I ASSEMBLY FACTOR ACAD9, MITOCHONDRIAL-RELATED (PTHR43884:SF12)	oxidoreductase activity, acting on the CH-CH group of donors(GO:0016627)			dehydrogenase(PC00092)		acyl-CoA dehydrogenase activity(GO:0003995);long-chain fatty acyl-CoA dehydrogenase activity(GO:0004466);oxidoreductase activity(GO:0016491);oxidoreductase activity, acting on the CH-CH group of donors(GO:0016627);flavin adenine dinucleotide binding(GO:0050660);medium-chain fatty acyl-CoA dehydrogenase activity(GO:0070991)	long-chain fatty acid metabolic process(GO:0001676);mitochondrial respiratory chain complex I assembly(GO:0032981);medium-chain fatty acid metabolic process(GO:0051791)	nucleus(GO:0005634);mitochondrion(GO:0005739);mitochondrial inner membrane(GO:0005743);membrane(GO:0016020);dendrite(GO:0030425);mitochondrial membrane(GO:0031966)	Respiratory electron transport, ATP synthesis by chemiosmotic coupling, and heat production by uncoupling proteins.;Complex I biogenesis;Respiratory electron transport;The citric acid (TCA) cycle and respiratory electron transport;Metabolism					Mus musculus
MOUSE|MGI=MGI=1921371|UniProtKB=Q9DBS4	Q9DBS4	Acyl-coenzyme A oxidase-like protein;Acoxl;PTN000097793;orthologs	ACYL-COENZYME A OXIDASE-LIKE PROTEIN (PTHR10909:SF378)	fatty acid binding(GO:0005504);oxidoreductase activity, acting on the CH-CH group of donors(GO:0016627);flavin adenine dinucleotide binding(GO:0050660)	fatty acid beta-oxidation(GO:0006635);lipid homeostasis(GO:0055088)	peroxisome(GO:0005777)	oxidoreductase(PC00176)		acyl-CoA oxidase activity(GO:0003997);fatty acid binding(GO:0005504);oxidoreductase activity(GO:0016491);oxidoreductase activity, acting on the CH-CH group of donors(GO:0016627);flavin adenine dinucleotide binding(GO:0050660);FAD binding(GO:0071949)	fatty acid metabolic process(GO:0006631);fatty acid beta-oxidation(GO:0006635);fatty acid beta-oxidation using acyl-CoA oxidase(GO:0033540);lipid homeostasis(GO:0055088)	peroxisome(GO:0005777)	Beta-oxidation of pristanoyl-CoA;Peroxisomal lipid metabolism;Fatty acid metabolism;Metabolism of lipids;Metabolism					Mus musculus
MOUSE|MGI=MGI=1933156|UniProtKB=Q9EPL9	Q9EPL9	Peroxisomal acyl-coenzyme A oxidase 3;Acox3;PTN000097660;orthologs	PEROXISOMAL ACYL-COENZYME A OXIDASE 3 (PTHR10909:SF352)	fatty acid binding(GO:0005504);oxidoreductase activity, acting on the CH-CH group of donors(GO:0016627);flavin adenine dinucleotide binding(GO:0050660)	fatty acid beta-oxidation(GO:0006635);lipid homeostasis(GO:0055088)	peroxisome(GO:0005777)	oxidoreductase(PC00176)		acyl-CoA oxidase activity(GO:0003997);fatty acid binding(GO:0005504);pristanoyl-CoA oxidase activity(GO:0016402);oxidoreductase activity(GO:0016491);oxidoreductase activity, acting on the CH-CH group of donors(GO:0016627);flavin adenine dinucleotide binding(GO:0050660);FAD binding(GO:0071949)	lipid metabolic process(GO:0006629);fatty acid metabolic process(GO:0006631);fatty acid beta-oxidation(GO:0006635);fatty acid beta-oxidation using acyl-CoA oxidase(GO:0033540);lipid homeostasis(GO:0055088)	mitochondrion(GO:0005739);peroxisome(GO:0005777);peroxisomal matrix(GO:0005782)	Protein localization;Beta-oxidation of pristanoyl-CoA;Peroxisomal protein import;Peroxisomal lipid metabolism;Fatty acid metabolism;Metabolism of lipids;Metabolism					Mus musculus
MOUSE|MGI=MGI=2384931|UniProtKB=Q99J47	Q99J47	Dehydrogenase_reductase SDR family member 7B;Dhrs7b;PTN000674032;orthologs	DEHYDROGENASE_REDUCTASE SDR FAMILY MEMBER 7B (PTHR44196:SF1)			membrane(GO:0016020)	dehydrogenase(PC00092)		acylglycerone-phosphate reductase activity(GO:0000140);transcription corepressor activity(GO:0003714);protein binding(GO:0005515);oxidoreductase activity(GO:0016491);DNA-binding transcription factor binding(GO:0140297)	regulation of DNA-templated transcription(GO:0006355);phosphatidylcholine biosynthetic process(GO:0006656);inflammatory response(GO:0006954);ether lipid biosynthetic process(GO:0008611);regulation of gene expression(GO:0010468);neutrophil differentiation(GO:0030223);negative regulation of protein binding(GO:0032091);brown fat cell differentiation(GO:0050873);adipose tissue development(GO:0060612)…	nucleus(GO:0005634);transcription regulator complex(GO:0005667);peroxisome(GO:0005777);endoplasmic reticulum(GO:0005783);membrane(GO:0016020)	Plasmalogen biosynthesis;Metabolism of lipids;Wax and plasmalogen biosynthesis;Metabolism					Mus musculus
MOUSE|MGI=MGI=1351627|UniProtKB=Q8BKZ9	Q8BKZ9	Pyruvate dehydrogenase protein X component, mitochondrial;Pdhx;PTN000568063;orthologs	PYRUVATE DEHYDROGENASE PROTEIN X COMPONENT, MITOCHONDRIAL (PTHR23151:SF9)			oxidoreductase complex(GO:1990204);mitochondrion(GO:0005739)	acetyltransferase(PC00038)		acyltransferase activity(GO:0016746);pyruvate dehydrogenase (NAD+) activity(GO:0034604)	acetyl-CoA biosynthetic process from pyruvate(GO:0006086)	mitochondrion(GO:0005739);mitochondrial pyruvate dehydrogenase complex(GO:0005967);dihydrolipoyl dehydrogenase complex(GO:0045240);pyruvate dehydrogenase complex(GO:0045254);acetyltransferase complex(GO:1902493)	Signaling by Nuclear Receptors;Glyoxylate metabolism and glycine degradation;Pyruvate metabolism;Regulation of pyruvate dehydrogenase (PDH) complex;Metabolism of amino acids and derivatives;The citric acid (TCA) cycle and respiratory electron transport;Metabolism;Signaling by Retinoic Acid;Signal Transduction;Pyruvate metabolism and Citric Acid (TCA) cycle					Mus musculus
MOUSE|MGI=MGI=88061|UniProtKB=P08030	P08030	Adenine phosphoribosyltransferase;Aprt;PTN000794356;orthologs	ADENINE PHOSPHORIBOSYLTRANSFERASE (PTHR32315:SF3)	cation binding(GO:0043169);anion binding(GO:0043168);pentosyltransferase activity(GO:0016763);purine ribonucleotide binding(GO:0032555)	purine ribonucleotide biosynthetic process(GO:0009152);nucleoside monophosphate metabolic process(GO:0009123);purine nucleobase metabolic process(GO:0006144)	cytoplasm(GO:0005737)	transferase(PC00220)	Adenine and hypoxanthine salvage pathway->Adenine phosphoribosyl transferase;;	adenine binding(GO:0002055);adenine phosphoribosyltransferase activity(GO:0003999);AMP binding(GO:0016208);transferase activity(GO:0016740);glycosyltransferase activity(GO:0016757)	purine ribonucleoside salvage(GO:0006166);adenine salvage(GO:0006168);lactation(GO:0007595);grooming behavior(GO:0007625);GMP salvage(GO:0032263);IMP salvage(GO:0032264);AMP salvage(GO:0044209);adenine metabolic process(GO:0046083)	nucleoplasm(GO:0005654);cytoplasm(GO:0005737);cytosol(GO:0005829)	Immune System;Nucleotide salvage;Innate Immune System;Metabolism;Neutrophil degranulation;Purine salvage;Metabolism of nucleotides					Mus musculus
MOUSE|MGI=MGI=1917160|UniProtKB=Q8BMD8	Q8BMD8	Calcium-binding mitochondrial carrier protein SCaMC-1;Slc25a24;PTN000641684;orthologs	CALCIUM-BINDING MITOCHONDRIAL CARRIER PROTEIN SCAMC-1 (PTHR24089:SF262)	organic anion transmembrane transporter activity(GO:0008514);carbohydrate derivative transmembrane transporter activity(GO:1901505);purine nucleotide transmembrane transporter activity(GO:0015216);salt transmembrane transporter activity(GO:1901702)	carbohydrate derivative transport(GO:1901264);organophosphate ester transport(GO:0015748);nucleobase-containing compound transport(GO:0015931);organic anion transport(GO:0015711)		mitochondrial carrier protein(PC00158)		adenine nucleotide transmembrane transporter activity(GO:0000295);ATP transmembrane transporter activity(GO:0005347);calcium ion binding(GO:0005509);antiporter activity(GO:0015297);metal ion binding(GO:0046872);ATP:inorganic phosphate antiporter activity(GO:0140987);ADP:inorganic phosphate antiporter activity(GO:0140988)	mitochondrial transport(GO:0006839);ADP transport(GO:0015866);ATP transport(GO:0015867);cellular response to oxidative stress(GO:0034599);adenine nucleotide transport(GO:0051503);transmembrane transport(GO:0055085);cellular response to calcium ion(GO:0071277);mitochondrial ATP transmembrane transport(GO:1990544)	mitochondrion(GO:0005739);mitochondrial inner membrane(GO:0005743);membrane(GO:0016020)						Mus musculus
MOUSE|MGI=MGI=1353496|UniProtKB=P51881	P51881	ADP_ATP translocase 2;Slc25a5;PTN000640130;orthologs	ADP_ATP TRANSLOCASE 2 (PTHR45635:SF3)		regulation of transport(GO:0051049);mitochondrial transport(GO:0006839);negative regulation of organelle organization(GO:0010639);regulation of mitochondrion organization(GO:0010821);negative regulation of apoptotic signaling pathway(GO:2001234);regulation of membrane permeability(GO:0090559);mitochondrial membrane organization(GO:0007006)		transfer/carrier protein(PC00219)		adenine nucleotide transmembrane transporter activity(GO:0000295);ATP:ADP antiporter activity(GO:0005471);protein binding(GO:0005515);proton transmembrane transporter activity(GO:0015078);antiporter activity(GO:0015297);oxidative phosphorylation uncoupler activity(GO:0017077);ubiquitin protein ligase binding(GO:0031625)	chromosome segregation(GO:0007059);positive regulation of cell population proliferation(GO:0008284);B cell differentiation(GO:0030183);erythrocyte differentiation(GO:0030218);regulation of mitochondrial membrane permeability(GO:0046902);adenine nucleotide transport(GO:0051503);transmembrane transport(GO:0055085);mitochondrial ADP transmembrane transport(GO:0140021);negative regulation of mitochon…	mitochondrion(GO:0005739);mitochondrial inner membrane(GO:0005743);mitochondrial permeability transition pore complex(GO:0005757);membrane(GO:0016020);mitochondrial nucleoid(GO:0042645);myelin sheath(GO:0043209);membrane raft(GO:0045121);MMXD complex(GO:0071817)	Transport of small molecules;Transport of nucleosides and free purine and pyrimidine bases across the plasma membrane;SLC-mediated transmembrane transport;Transport of vitamins, nucleosides, and related molecules					Mus musculus
MOUSE|MGI=MGI=87968|UniProtKB=P50247	P50247	Adenosylhomocysteinase;Ahcy;PTN000602860;orthologs	ADENOSYLHOMOCYSTEINASE (PTHR23420:SF0)	hydrolase activity(GO:0016787)	sulfur compound metabolic process(GO:0006790);organic substance metabolic process(GO:0071704)	cytosol(GO:0005829)	hydrolase(PC00121)		adenosylhomocysteinase activity(GO:0004013);copper ion binding(GO:0005507);protein binding(GO:0005515);adenyl nucleotide binding(GO:0030554);identical protein binding(GO:0042802);protein self-association(GO:0043621);NAD binding(GO:0051287)	chronic inflammatory response to antigenic stimulus(GO:0002439);response to nutrient(GO:0007584);S-adenosylhomocysteine catabolic process(GO:0019510);S-adenosylmethionine cycle(GO:0033353);circadian sleep/wake cycle(GO:0042745)	cytosol(GO:0005829)	Methylation;Sulfur amino acid metabolism;Phase II - Conjugation of compounds;Metabolism;Metabolism of amino acids and derivatives;Biological oxidations					Mus musculus
MOUSE|MGI=MGI=1921590|UniProtKB=Q68FL4	Q68FL4	Putative adenosylhomocysteinase 3;Ahcyl2;PTN000602807;orthologs	ADENOSYLHOMOCYSTEINASE 3 (PTHR23420:SF2)	hydrolase activity(GO:0016787)	sulfur compound metabolic process(GO:0006790);organic substance metabolic process(GO:0071704)	cytosol(GO:0005829)	hydrolase(PC00121)		adenosylhomocysteinase activity(GO:0004013);hydrolase activity(GO:0016787)	one-carbon metabolic process(GO:0006730);S-adenosylmethionine cycle(GO:0033353)	cytoplasm(GO:0005737);endoplasmic reticulum(GO:0005783);cytosol(GO:0005829);neuron projection(GO:0043005);intracellular membrane-bounded organelle(GO:0043231)	Transport of small molecules;Transport of inorganic cations/anions and amino acids/oligopeptides;Bicarbonate transporters;SLC-mediated transmembrane transport					Mus musculus
MOUSE|MGI=MGI=1334417|UniProtKB=Q99LP6	Q99LP6	GrpE protein homolog 1, mitochondrial;Grpel1;PTN000478314;orthologs	GRPE PROTEIN HOMOLOG 1, MITOCHONDRIAL (PTHR21237:SF25)	molecular function regulator activity(GO:0098772);purine nucleotide binding(GO:0017076);unfolded protein binding(GO:0051082)	protein import into mitochondrial matrix(GO:0030150)	TIM23 mitochondrial import inner membrane translocase complex(GO:0005744);mitochondrial matrix(GO:0005759)	primary active transporter(PC00068)		adenyl-nucleotide exchange factor activity(GO:0000774);ATPase activator activity(GO:0001671);identical protein binding(GO:0042802);protein homodimerization activity(GO:0042803);unfolded protein binding(GO:0051082);protein-folding chaperone binding(GO:0051087);ATPase binding(GO:0051117)	protein folding(GO:0006457);protein import into mitochondrial matrix(GO:0030150)	PAM complex, Tim23 associated import motor(GO:0001405);nucleoplasm(GO:0005654);mitochondrion(GO:0005739);mitochondrial matrix(GO:0005759)						Mus musculus
MOUSE|MGI=MGI=1891254|UniProtKB=Q91YN9	Q91YN9	BAG family molecular chaperone regulator 2;Bag2;PTN000269279;orthologs	BAG FAMILY MOLECULAR CHAPERONE REGULATOR 2 (PTHR12334:SF6)	molecular function regulator activity(GO:0098772);purine nucleotide binding(GO:0017076)	protein stabilization(GO:0050821)		chaperone(PC00072)		adenyl-nucleotide exchange factor activity(GO:0000774);heat shock protein binding(GO:0031072);ubiquitin protein ligase binding(GO:0031625);identical protein binding(GO:0042802);transmembrane transporter binding(GO:0044325);tau protein binding(GO:0048156);protein-folding chaperone binding(GO:0051087)	positive regulation of protein processing(GO:0010954);protein metabolic process(GO:0019538);negative regulation of protein ubiquitination(GO:0031397);negative regulation of protein binding(GO:0032091);protein stabilization(GO:0050821);positive regulation of proteasomal protein catabolic process(GO:1901800);negative regulation of ubiquitin protein ligase activity(GO:1904667)	microtubule(GO:0005874);axon(GO:0030424);dendrite(GO:0030425);protein folding chaperone complex(GO:0101031);dendritic microtubule(GO:1901588)	Regulation of HSF1-mediated heat shock response;Cellular responses to stimuli;Cellular responses to stress;Cellular response to heat stress					Mus musculus
MOUSE|MGI=MGI=1932040|UniProtKB=Q9EPK6	Q9EPK6	Nucleotide exchange factor SIL1;Sil1;PTN000448417;orthologs	NUCLEOTIDE EXCHANGE FACTOR SIL1 (PTHR19316:SF35)						adenyl-nucleotide exchange factor activity(GO:0000774);identical protein binding(GO:0042802)	protein transport(GO:0015031)	endoplasmic reticulum(GO:0005783)						Mus musculus
MOUSE|MGI=MGI=97549|UniProtKB=P62962	P62962	Profilin-1;Pfn1;PTN000358514;orthologs	PROFILIN-1 (PTHR13936:SF14)	actin binding(GO:0003779)	regulation of actin filament polymerization(GO:0030833);positive regulation of actin filament bundle assembly(GO:0032233)	cytoplasm(GO:0005737)	non-motor actin binding protein(PC00165)	Cytoskeletal regulation by Rho GTPase->Profilin;;	adenyl-nucleotide exchange factor activity(GO:0000774);phosphotyrosine residue binding(GO:0001784);actin binding(GO:0003779);actin monomer binding(GO:0003785);signaling receptor binding(GO:0005102);protein binding(GO:0005515);phosphatidylinositol-4,5-bisphosphate binding(GO:0005546);small GTPase binding(GO:0031267);proline-rich region binding(GO:0070064)	neural tube closure(GO:0001843);regulation of transcription by RNA polymerase II(GO:0006357);regulation of actin polymerization or depolymerization(GO:0008064);positive regulation of epithelial cell migration(GO:0010634);actin cytoskeleton organization(GO:0030036);regulation of actin filament polymerization(GO:0030833);negative regulation of actin filament polymerization(GO:0030837);positive regu…	extracellular region(GO:0005576);nucleus(GO:0005634);cytoplasm(GO:0005737);cytosol(GO:0005829);cytoskeleton(GO:0005856);cell cortex(GO:0005938);Schaffer collateral - CA1 synapse(GO:0098685);parallel fiber to Purkinje cell synapse(GO:0098688);presynapse(GO:0098793);postsynapse(GO:0098794);glutamatergic synapse(GO:0098978)	Signaling by Rho GTPases;Developmental Biology;RHO GTPase Effectors;Axon guidance;Signaling by WNT;Nervous system development;Signaling by ROBO receptors;PCP/CE pathway;RHO GTPases Activate Formins;Signal Transduction;Signaling by Rho GTPases, Miro GTPases and RHOBTB3;Beta-catenin independent WNT signaling					Mus musculus
MOUSE|MGI=MGI=1914634|UniProtKB=Q8CI61	Q8CI61	BAG family molecular chaperone regulator 4;Bag4;PTN000269174;orthologs	BAG FAMILY MOLECULAR CHAPERONE REGULATOR 4 (PTHR12329:SF10)	molecular function regulator activity(GO:0098772);protein-folding chaperone binding(GO:0051087);purine nucleotide binding(GO:0017076)	protein stabilization(GO:0050821)	nucleus(GO:0005634);membrane(GO:0016020);cytosol(GO:0005829)	chaperone(PC00072)	Apoptosis signaling pathway->Silencer of death domains;;	adenyl-nucleotide exchange factor activity(GO:0000774);protein binding(GO:0005515);ubiquitin protein ligase binding(GO:0031625);protein-containing complex binding(GO:0044877);protein-folding chaperone binding(GO:0051087)	apoptotic process(GO:0006915);positive regulation of fibroblast migration(GO:0010763);positive regulation of actin filament polymerization(GO:0030838);positive regulation of peptidyl-serine phosphorylation(GO:0033138);regulation of apoptotic process(GO:0042981);positive regulation of cell adhesion(GO:0045785);protein stabilization(GO:0050821);positive regulation of stress fiber assembly(GO:005149…	nucleus(GO:0005634);cytoplasm(GO:0005737);cytosol(GO:0005829);plasma membrane(GO:0005886);membrane(GO:0016020)	TNF signaling;Cellular responses to stimuli;Death Receptor Signaling;Regulation of HSF1-mediated heat shock response;Cellular responses to stress;Signal Transduction;Cellular response to heat stress					Mus musculus
MOUSE|MGI=MGI=108047|UniProtKB=Q60739	Q60739	BAG family molecular chaperone regulator 1;Bag1;PTN000422105;orthologs	BAG FAMILY MOLECULAR CHAPERONE REGULATOR 1 (PTHR12329:SF16)	molecular function regulator activity(GO:0098772);protein-folding chaperone binding(GO:0051087);purine nucleotide binding(GO:0017076)	protein stabilization(GO:0050821)	cytoplasm(GO:0005737)	chaperone(PC00072)	Apoptosis signaling pathway->Bcl-2 associated anthogene-1;;	adenyl-nucleotide exchange factor activity(GO:0000774);protein binding(GO:0005515);ubiquitin protein ligase binding(GO:0031625);protein-folding chaperone binding(GO:0051087)	negative regulation of protein phosphorylation(GO:0001933);protein phosphorylation(GO:0006468);apoptotic process(GO:0006915);positive regulation of Schwann cell differentiation(GO:0014040);neuron differentiation(GO:0030182);negative regulation of apoptotic process(GO:0043066);protein stabilization(GO:0050821);chaperone cofactor-dependent protein refolding(GO:0051085);protein localization to mitoc…	nucleus(GO:0005634);nucleoplasm(GO:0005654);cytoplasm(GO:0005737);cytosol(GO:0005829);membrane(GO:0016020);perinuclear region of cytoplasm(GO:0048471)	Regulation of HSF1-mediated heat shock response;Cellular responses to stimuli;Cellular responses to stress;Cellular response to heat stress					Mus musculus
MOUSE|MGI=MGI=1913495|UniProtKB=Q99P31	Q99P31	Hsp70-binding protein 1;Hspbp1;PTN000448445;orthologs	HSP70-BINDING PROTEIN 1 (PTHR19316:SF18)	molecular function regulator activity(GO:0098772);purine nucleotide binding(GO:0017076)		endoplasmic reticulum(GO:0005783)			adenyl-nucleotide exchange factor activity(GO:0000774);ubiquitin protein ligase binding(GO:0031625);molecular sequestering activity(GO:0140313)	positive regulation of protein ubiquitination(GO:0031398);positive regulation of proteasomal ubiquitin-dependent protein catabolic process(GO:0032436)	extracellular space(GO:0005615);endoplasmic reticulum(GO:0005783)						Mus musculus
MOUSE|MGI=MGI=87926|UniProtKB=Q64437	Q64437	All-trans-retinol dehydrogenase [NAD(+)] ADH7;Adh7;PTN000191714;orthologs	ALL-TRANS-RETINOL DEHYDROGENASE [NAD(+)] ADH7 (PTHR43880:SF2)	zinc ion binding(GO:0008270);NAD-retinol dehydrogenase activity(GO:0004745)	generation of precursor metabolites and energy(GO:0006091);response to organic substance(GO:0010033);small molecule catabolic process(GO:0044282);detoxification(GO:0098754);retinol metabolic process(GO:0042572);organic substance catabolic process(GO:1901575);cellular response to oxygen-containing compound(GO:1901701);cellular catabolic process(GO:0044248);monocarboxylic acid metabolic process(GO:…	cytosol(GO:0005829)	dehydrogenase(PC00092)		alcohol dehydrogenase (NAD+) activity(GO:0004022);alcohol dehydrogenase activity, zinc-dependent(GO:0004024);aldehyde oxidase activity(GO:0004031);NAD-retinol dehydrogenase activity(GO:0004745);zinc ion binding(GO:0008270);oxidoreductase activity(GO:0016491);retinol binding(GO:0019841);ethanol binding(GO:0035276);identical protein binding(GO:0042802);metal ion binding(GO:0046872);receptor antagon…	retinoid metabolic process(GO:0001523);ethanol metabolic process(GO:0006067);ethanol catabolic process(GO:0006068);ethanol oxidation(GO:0006069);lipid metabolic process(GO:0006629);response to bacterium(GO:0009617);fatty acid omega-oxidation(GO:0010430);retinol metabolic process(GO:0042572);retinoic acid metabolic process(GO:0042573);response to ethanol(GO:0045471)	intracellular anatomical structure(GO:0005622);cytoplasm(GO:0005737);cytosol(GO:0005829);plasma membrane(GO:0005886)	Phase I - Functionalization of compounds;Metabolism;Biological oxidations;Ethanol oxidation					Mus musculus
MOUSE|MGI=MGI=87929|UniProtKB=P28474	P28474	Alcohol dehydrogenase class-3;Adh5;PTN000191754;orthologs	ALCOHOL DEHYDROGENASE CLASS-3 (PTHR43880:SF4)	zinc ion binding(GO:0008270);oxidoreductase activity, acting on the CH-OH group of donors, NAD or NADP as acceptor(GO:0016616)	response to organic substance(GO:0010033);small molecule catabolic process(GO:0044282);detoxification(GO:0098754);organic substance catabolic process(GO:1901575);cellular response to oxygen-containing compound(GO:1901701);cellular catabolic process(GO:0044248)	cytosol(GO:0005829)	dehydrogenase(PC00092)		alcohol dehydrogenase (NAD+) activity(GO:0004022);alcohol dehydrogenase activity, zinc-dependent(GO:0004024);fatty acid binding(GO:0005504);zinc ion binding(GO:0008270);oxidoreductase activity(GO:0016491);formaldehyde dehydrogenase activity(GO:0018467);identical protein binding(GO:0042802);metal ion binding(GO:0046872);S-(hydroxymethyl)glutathione dehydrogenase activity(GO:0051903);S-(hydroxymeth…	retinoid metabolic process(GO:0001523);respiratory system process(GO:0003016);ethanol catabolic process(GO:0006068);ethanol oxidation(GO:0006069);lipid metabolic process(GO:0006629);fatty acid omega-oxidation(GO:0010430);peptidyl-cysteine S-nitrosylation(GO:0018119);response to lipopolysaccharide(GO:0032496);positive regulation of blood pressure(GO:0045777);formaldehyde catabolic process(GO:00462…	cytoplasm(GO:0005737);mitochondrion(GO:0005739);cytosol(GO:0005829)	Phase I - Functionalization of compounds;Metabolism;Biological oxidations;Ethanol oxidation					Mus musculus
MOUSE|MGI=MGI=108186|UniProtKB=Q9DBF1	Q9DBF1	Alpha-aminoadipic semialdehyde dehydrogenase;Aldh7a1;PTN000192454;orthologs	ALPHA-AMINOADIPIC SEMIALDEHYDE DEHYDROGENASE (PTHR43521:SF1)				dehydrogenase(PC00092)	5-Hydroxytryptamine degredation->Aldehyde Dehydrogenase;;	aldehyde dehydrogenase (NAD+) activity(GO:0004029);L-aminoadipate-semialdehyde dehydrogenase activity(GO:0004043);betaine-aldehyde dehydrogenase activity(GO:0008802);oxidoreductase activity(GO:0016491);oxidoreductase activity, acting on the aldehyde or oxo group of donors, NAD or NADP as acceptor(GO:0016620);identical protein binding(GO:0042802);glyceraldehyde-3-phosphate dehydrogenase (NAD+) (no…		nucleus(GO:0005634);cytoplasm(GO:0005737);mitochondrion(GO:0005739);cytosol(GO:0005829)	Choline catabolism;Metabolism;Lysine catabolism;Metabolism of amino acids and derivatives					Mus musculus
MOUSE|MGI=MGI=1861622|UniProtKB=Q9JLJ2	Q9JLJ2	4-trimethylaminobutyraldehyde dehydrogenase;Aldh9a1;PTN000193414;orthologs	4-TRIMETHYLAMINOBUTYRALDEHYDE DEHYDROGENASE (PTHR11699:SF228)	oxidoreductase activity(GO:0016491)			dehydrogenase(PC00092)	5-Hydroxytryptamine degredation->Aldehyde Dehydrogenase;;	aldehyde dehydrogenase (NAD+) activity(GO:0004029);oxidoreductase activity(GO:0016491);oxidoreductase activity, acting on the aldehyde or oxo group of donors, NAD or NADP as acceptor(GO:0016620);formaldehyde dehydrogenase activity(GO:0018467);aminobutyraldehyde dehydrogenase activity(GO:0019145);small molecule binding(GO:0036094);identical protein binding(GO:0042802);amine binding(GO:0043176);gly…	cellular aldehyde metabolic process(GO:0006081);carnitine metabolic process(GO:0009437);carnitine biosynthetic process(GO:0045329);protein homotetramerization(GO:0051289)	cytoplasm(GO:0005737);mitochondrion(GO:0005739);cytosol(GO:0005829)	Carnitine synthesis;Metabolism;Metabolism of amino acids and derivatives					Mus musculus
MOUSE|MGI=MGI=1919785|UniProtKB=Q9CZS1	Q9CZS1	Aldehyde dehydrogenase X, mitochondrial;Aldh1b1;PTN000192845;orthologs	ALDEHYDE DEHYDROGENASE X, MITOCHONDRIAL (PTHR11699:SF207)	oxidoreductase activity(GO:0016491)			dehydrogenase(PC00092)	5-Hydroxytryptamine degredation->Aldehyde Dehydrogenase;;	aldehyde dehydrogenase (NAD+) activity(GO:0004029);oxidoreductase activity(GO:0016491);oxidoreductase activity, acting on the aldehyde or oxo group of donors, NAD or NADP as acceptor(GO:0016620);glyceraldehyde-3-phosphate dehydrogenase (NAD+) (non-phosphorylating) activity(GO:0043878)		nucleoplasm(GO:0005654);mitochondrion(GO:0005739);cytosol(GO:0005829)	Phase I - Functionalization of compounds;Metabolism;Biological oxidations;Ethanol oxidation					Mus musculus
MOUSE|MGI=MGI=99600|UniProtKB=P47738	P47738	Aldehyde dehydrogenase, mitochondrial;Aldh2;PTN000192867;orthologs	ALDEHYDE DEHYDROGENASE, MITOCHONDRIAL (PTHR11699:SF233)	oxidoreductase activity(GO:0016491)			dehydrogenase(PC00092)	5-Hydroxytryptamine degredation->Aldehyde Dehydrogenase;;	aldehyde dehydrogenase (NAD+) activity(GO:0004029);protein binding(GO:0005515);oxidoreductase activity(GO:0016491);oxidoreductase activity, acting on the aldehyde or oxo group of donors, NAD or NADP as acceptor(GO:0016620);nitroglycerin reductase activity(GO:0018547);identical protein binding(GO:0042802);glyceraldehyde-3-phosphate dehydrogenase (NAD+) (non-phosphorylating) activity(GO:0043878);NA…	acetaldehyde metabolic process(GO:0006117);intrinsic apoptotic signaling pathway in response to oxidative stress(GO:0008631);response to organic cyclic compound(GO:0014070);negative regulation of apoptotic process(GO:0043066);aldehyde catabolic process(GO:0046185);behavioral response to ethanol(GO:0048149);cellular detoxification of aldehyde(GO:0110095);regulation of dopamine biosynthetic process…	mitochondrion(GO:0005739);mitochondrial matrix(GO:0005759)	Phase I - Functionalization of compounds;Ethanol oxidation;Neuronal System;Muscle contraction;Transmission across Chemical Synapses;Biological oxidations;Neurotransmitter clearance;Serotonin clearance from the synaptic cleft;Metabolism of serotonin;Smooth Muscle Contraction;Metabolism					Mus musculus
MOUSE|MGI=MGI=1919122|UniProtKB=Q3TYQ9	Q3TYQ9	Aldehyde oxidase 4;Aox4;PTN001727040;orthologs	ALDEHYDE OXIDASE 4 (PTHR11908:SF88)	oxidoreductase activity(GO:0016491)			oxidoreductase(PC00176)		aldehyde oxidase activity(GO:0004031);iron ion binding(GO:0005506);electron transfer activity(GO:0009055);oxidoreductase activity(GO:0016491);molybdenum ion binding(GO:0030151);metal ion binding(GO:0046872);flavin adenine dinucleotide binding(GO:0050660);NAD binding(GO:0051287);iron-sulfur cluster binding(GO:0051536);2 iron, 2 sulfur cluster binding(GO:0051537);FAD binding(GO:0071949)	electron transport chain(GO:0022900)	cytoplasm(GO:0005737)						Mus musculus
MOUSE|MGI=MGI=1929955|UniProtKB=Q9JII6	Q9JII6	Aldo-keto reductase family 1 member A1;Akr1a1;PTN000199013;orthologs	ALDO-KETO REDUCTASE FAMILY 1 MEMBER A1 (PTHR11732:SF544)	oxidoreductase activity, acting on the CH-OH group of donors, NAD or NADP as acceptor(GO:0016616)		cytosol(GO:0005829)	reductase(PC00198)		alditol:NADP+ 1-oxidoreductase activity(GO:0004032);alcohol dehydrogenase (NADP+) activity(GO:0008106);oxidoreductase activity(GO:0016491);allyl-alcohol dehydrogenase activity(GO:0047655);L-glucuronate reductase activity(GO:0047939);glucuronolactone reductase activity(GO:0047941);S-nitrosoglutathione reductase activity(GO:0080007)	lipid metabolic process(GO:0006629);glucuronate catabolic process to xylulose 5-phosphate(GO:0019640);L-ascorbic acid biosynthetic process(GO:0019853);D-glucuronate catabolic process(GO:0042840);negative regulation of apoptotic process(GO:0043066);daunorubicin metabolic process(GO:0044597);doxorubicin metabolic process(GO:0044598);aldehyde catabolic process(GO:0046185);cellular detoxification of …	cytoplasm(GO:0005737);cytosol(GO:0005829);plasma membrane(GO:0005886);membrane(GO:0016020);apical plasma membrane(GO:0016324);synapse(GO:0045202)	Phase II - Conjugation of compounds;Glutathione conjugation;Formation of xylulose-5-phosphate;Metabolism of carbohydrates;Metabolism;Biological oxidations					Mus musculus
MOUSE|MGI=MGI=107796|UniProtKB=Q8CG76	Q8CG76	Aflatoxin B1 aldehyde reductase member 2;Akr7a2;PTN000199526;orthologs	AFLATOXIN B1 ALDEHYDE REDUCTASE MEMBER 2 (PTHR43625:SF12)	oxidoreductase activity, acting on the CH-OH group of donors, NAD or NADP as acceptor(GO:0016616)		cytoplasm(GO:0005737)	reductase(PC00198)		alditol:NADP+ 1-oxidoreductase activity(GO:0004032);aldo-keto reductase (NADP) activity(GO:0004033);oxidoreductase activity(GO:0016491);phenanthrene-9,10-epoxide hydrolase activity(GO:0019119);identical protein binding(GO:0042802)	lipid metabolic process(GO:0006629)	nuclear envelope(GO:0005635);cytoplasm(GO:0005737);mitochondrion(GO:0005739);Golgi apparatus(GO:0005794);cytosol(GO:0005829)	Aflatoxin activation and detoxification;Metabolism;Biological oxidations					Mus musculus
MOUSE|MGI=MGI=1914758|UniProtKB=Q9DCT1	Q9DCT1	1,5-anhydro-D-fructose reductase;Akr1e2;PTN000198989;orthologs	1,5-ANHYDRO-D-FRUCTOSE REDUCTASE (PTHR11732:SF391)	oxidoreductase activity, acting on the CH-OH group of donors, NAD or NADP as acceptor(GO:0016616)		cytosol(GO:0005829)	reductase(PC00198)		alditol:NADP+ 1-oxidoreductase activity(GO:0004032);oxidoreductase activity(GO:0016491);1,5-anhydro-D-fructose reductase activity(GO:0050571)		cytoplasm(GO:0005737);cytosol(GO:0005829)						Mus musculus
MOUSE|MGI=MGI=109155|UniProtKB=P63143	P63143	Voltage-gated potassium channel subunit beta-1;Kcnab1;PTN000198848;orthologs	VOLTAGE-GATED POTASSIUM CHANNEL SUBUNIT BETA-1 (PTHR43150:SF7)	oxidoreductase activity, acting on the CH-OH group of donors, NAD or NADP as acceptor(GO:0016616);potassium channel regulator activity(GO:0015459);transmembrane transporter binding(GO:0044325)	negative regulation of monoatomic ion transport(GO:0043271);regulation of delayed rectifier potassium channel activity(GO:1902259);negative regulation of cellular process(GO:0048523);negative regulation of molecular function(GO:0044092)	plasma membrane protein complex(GO:0098797);extrinsic component of cytoplasmic side of plasma membrane(GO:0031234);cation channel complex(GO:0034703);main axon(GO:0044304)			aldo-keto reductase (NADP) activity(GO:0004033);voltage-gated potassium channel activity(GO:0005249);protein binding(GO:0005515);potassium channel regulator activity(GO:0015459);oxidoreductase activity(GO:0016491);protein domain specific binding(GO:0019904);transmembrane transporter binding(GO:0044325);NADPH binding(GO:0070402);molecular function inhibitor activity(GO:0140678)	monoatomic ion transport(GO:0006811);potassium ion transport(GO:0006813);learning or memory(GO:0007611);monoatomic ion transmembrane transport(GO:0034220);transmembrane transport(GO:0055085);regulation of potassium ion transmembrane transporter activity(GO:1901016);regulation of potassium ion transmembrane transport(GO:1901379);negative regulation of voltage-gated potassium channel activity(GO:19…	cytoplasm(GO:0005737);cytosol(GO:0005829);plasma membrane(GO:0005886);voltage-gated potassium channel complex(GO:0008076);cytoplasmic side of plasma membrane(GO:0009898);membrane(GO:0016020);axon(GO:0030424);dendrite cytoplasm(GO:0032839);monoatomic ion channel complex(GO:0034702);potassium channel complex(GO:0034705);neuronal cell body(GO:0043025);perikaryon(GO:0043204);juxtaparanode region of a…	Voltage gated Potassium channels;Potassium Channels;Neuronal System					Mus musculus
MOUSE|MGI=MGI=109239|UniProtKB=P62482	P62482	Voltage-gated potassium channel subunit beta-2;Kcnab2;PTN000198801;orthologs	VOLTAGE-GATED POTASSIUM CHANNEL SUBUNIT BETA-2 (PTHR43150:SF1)	oxidoreductase activity, acting on the CH-OH group of donors, NAD or NADP as acceptor(GO:0016616);potassium channel regulator activity(GO:0015459);transmembrane transporter binding(GO:0044325)	regulation of membrane potential(GO:0042391);regulation of potassium ion transmembrane transport(GO:1901379)	plasma membrane protein complex(GO:0098797);extrinsic component of cytoplasmic side of plasma membrane(GO:0031234);cation channel complex(GO:0034703);main axon(GO:0044304)			aldo-keto reductase (NADP) activity(GO:0004033);voltage-gated potassium channel activity(GO:0005249);protein binding(GO:0005515);potassium channel regulator activity(GO:0015459);oxidoreductase activity(GO:0016491);transmembrane transporter binding(GO:0044325);protein-containing complex binding(GO:0044877)	hematopoietic progenitor cell differentiation(GO:0002244);monoatomic ion transport(GO:0006811);potassium ion transport(GO:0006813);monoatomic ion transmembrane transport(GO:0034220);neuromuscular process(GO:0050905);NADPH oxidation(GO:0070995);regulation of action potential(GO:0098900);regulation of potassium ion transmembrane transport(GO:1901379);regulation of protein localization to cell surfa…	cytoplasm(GO:0005737);cytosol(GO:0005829);cytoskeleton(GO:0005856);microtubule(GO:0005874);plasma membrane(GO:0005886);voltage-gated potassium channel complex(GO:0008076);cytoplasmic side of plasma membrane(GO:0009898);postsynaptic density(GO:0014069);membrane(GO:0016020);axon(GO:0030424);monoatomic ion channel complex(GO:0034702);potassium channel complex(GO:0034705);cell projection(GO:0042995);…	Immune System;Voltage gated Potassium channels;Potassium Channels;Innate Immune System;Neutrophil degranulation;Neuronal System					Mus musculus
MOUSE|MGI=MGI=96973|UniProtKB=P27808	P27808	Alpha-1,3-mannosyl-glycoprotein 2-beta-N-acetylglucosaminyltransferase;Mgat1;PTN000049431;orthologs	ALPHA-1,3-MANNOSYL-GLYCOPROTEIN 2-BETA-N-ACETYLGLUCOSAMINYLTRANSFERASE (PTHR10468:SF0)	catalytic activity, acting on a protein(GO:0140096);acetylglucosaminyltransferase activity(GO:0008375)	protein glycosylation(GO:0006486)	Golgi apparatus(GO:0005794)	protein modifying enzyme(PC00260)		alpha-1,3-mannosylglycoprotein 2-beta-N-acetylglucosaminyltransferase activity(GO:0003827);acetylglucosaminyltransferase activity(GO:0008375);transferase activity(GO:0016740);glycosyltransferase activity(GO:0016757);manganese ion binding(GO:0030145);metal ion binding(GO:0046872)	in utero embryonic development(GO:0001701);UDP-N-acetylglucosamine catabolic process(GO:0006049);protein glycosylation(GO:0006486);protein N-linked glycosylation(GO:0006487);protein N-linked glycosylation via asparagine(GO:0018279)	Golgi membrane(GO:0000139);cytoplasm(GO:0005737);Golgi apparatus(GO:0005794);membrane(GO:0016020)	N-glycan trimming and elongation in the cis-Golgi;Asparagine N-linked glycosylation;Post-translational protein modification;Metabolism of proteins;Transport to the Golgi and subsequent modification					Mus musculus
MOUSE|MGI=MGI=1914731|UniProtKB=Q9DBE8	Q9DBE8	Alpha-1,3_1,6-mannosyltransferase ALG2;Alg2;PTN000282476;orthologs	ALPHA-1,3_1,6-MANNOSYLTRANSFERASE ALG2 (PTHR45918:SF1)				transferase(PC00220)		alpha-1,3-mannosyltransferase activity(GO:0000033);GDP-Man:Man1GlcNAc2-PP-Dol alpha-1,3-mannosyltransferase activity(GO:0004378);transferase activity(GO:0016740);glycosyltransferase activity(GO:0016757);protein heterodimerization activity(GO:0046982);calcium-dependent protein binding(GO:0048306);GDP-Man:Man2GlcNAc2-PP-dolichol alpha-1,6-mannosyltransferase activity(GO:0102704)	protein glycosylation(GO:0006486);dolichol-linked oligosaccharide biosynthetic process(GO:0006488);oligosaccharide-lipid intermediate biosynthetic process(GO:0006490);response to calcium ion(GO:0051592)	nucleus(GO:0005634);cytoplasm(GO:0005737);membrane(GO:0016020);perinuclear region of cytoplasm(GO:0048471)	Asparagine N-linked glycosylation;Biosynthesis of the N-glycan precursor (dolichol lipid-linked oligosaccharide, LLO) and transfer to a nascent protein;Post-translational protein modification;Metabolism of proteins					Mus musculus
MOUSE|MGI=MGI=2384966|UniProtKB=Q921V5	Q921V5	Alpha-1,6-mannosyl-glycoprotein 2-beta-N-acetylglucosaminyltransferase;Mgat2;PTN000305545;orthologs	ALPHA-1,6-MANNOSYL-GLYCOPROTEIN 2-BETA-N-ACETYLGLUCOSAMINYLTRANSFERASE (PTHR12871:SF0)	catalytic activity, acting on a protein(GO:0140096);acetylglucosaminyltransferase activity(GO:0008375)	protein N-linked glycosylation(GO:0006487)	Golgi membrane(GO:0000139)	glycosyltransferase(PC00111)		alpha-1,6-mannosylglycoprotein 2-beta-N-acetylglucosaminyltransferase activity(GO:0008455);transferase activity(GO:0016740);glycosyltransferase activity(GO:0016757);manganese ion binding(GO:0030145);carbohydrate binding(GO:0030246);protein homodimerization activity(GO:0042803);metal ion binding(GO:0046872)	protein N-linked glycosylation(GO:0006487);oligosaccharide biosynthetic process(GO:0009312);protein N-linked glycosylation via asparagine(GO:0018279)	Golgi membrane(GO:0000139);Golgi apparatus(GO:0005794);Golgi stack(GO:0005795);membrane(GO:0016020)	N-glycan antennae elongation in the medial/trans-Golgi;Asparagine N-linked glycosylation;Post-translational protein modification;Reactions specific to the complex N-glycan synthesis pathway;Metabolism of proteins;Transport to the Golgi and subsequent modification					Mus musculus
MOUSE|MGI=MGI=1925543|UniProtKB=Q8C5W3	Q8C5W3	Tubulin-specific chaperone cofactor E-like protein;Tbcel;PTN000388758;orthologs	TUBULIN-SPECIFIC CHAPERONE COFACTOR E-LIKE PROTEIN (PTHR15140:SF6)	alpha-tubulin binding(GO:0043014)	protein-containing complex assembly(GO:0065003);microtubule cytoskeleton organization(GO:0000226);protein folding(GO:0006457)	cytoplasm(GO:0005737)	chaperone(PC00072)		alpha-tubulin binding(GO:0043014)	microtubule cytoskeleton organization(GO:0000226);protein folding(GO:0006457);tubulin complex assembly(GO:0007021);post-chaperonin tubulin folding pathway(GO:0007023)	cytoplasm(GO:0005737);cytoskeleton(GO:0005856)						Mus musculus
MOUSE|MGI=MGI=2145977|UniProtKB=Q3UH60	Q3UH60	Disco-interacting protein 2 homolog B;Dip2b;PTN000509101;orthologs	DISCO-INTERACTING PROTEIN 2 HOMOLOG B (PTHR22754:SF38)						alpha-tubulin binding(GO:0043014)	nervous system development(GO:0007399);negative regulation of axon extension(GO:0030517);positive regulation of peptidyl-lysine acetylation(GO:2000758)	nucleus(GO:0005634);cytoplasm(GO:0005737);axon(GO:0030424);dendrite(GO:0030425);cell projection(GO:0042995);perikaryon(GO:0043204)						Mus musculus
MOUSE|MGI=MGI=1917680|UniProtKB=Q8CIV8	Q8CIV8	Tubulin-specific chaperone E;Tbce;PTN000388802;orthologs	TUBULIN-SPECIFIC CHAPERONE E (PTHR15140:SF31)	alpha-tubulin binding(GO:0043014)	protein-containing complex assembly(GO:0065003);microtubule cytoskeleton organization(GO:0000226);protein folding(GO:0006457)	cytoplasm(GO:0005737)	chaperone(PC00072)		alpha-tubulin binding(GO:0043014);unfolded protein binding(GO:0051082)	microtubule cytoskeleton organization(GO:0000226);protein folding(GO:0006457);tubulin complex assembly(GO:0007021);post-chaperonin tubulin folding pathway(GO:0007023);mitotic spindle organization(GO:0007052);axonogenesis(GO:0007409);adult locomotory behavior(GO:0008344);post-embryonic development(GO:0009791);muscle atrophy(GO:0014889);developmental growth(GO:0048589);peripheral nervous system neu…	cytoplasm(GO:0005737);cytoskeleton(GO:0005856)						Mus musculus
MOUSE|MGI=MGI=109609|UniProtKB=O08914	O08914	Fatty-acid amide hydrolase 1;Faah;PTN000224209;orthologs	FATTY-ACID AMIDE HYDROLASE 1 (PTHR45847:SF3)	hydrolase activity, acting on carbon-nitrogen (but not peptide) bonds, in linear amides(GO:0016811)	fatty acid catabolic process(GO:0009062)		hydrolase(PC00121)	Anandamide degradation->Fatty acid amide hydrolase;;	amidase activity(GO:0004040);phospholipid binding(GO:0005543);lipid binding(GO:0008289);hydrolase activity(GO:0016787);hydrolase activity, acting on ester bonds(GO:0016788);fatty acid amide hydrolase activity(GO:0017064);identical protein binding(GO:0042802);acylglycerol lipase activity(GO:0047372)	lipid metabolic process(GO:0006629);fatty acid metabolic process(GO:0006631);fatty acid catabolic process(GO:0009062);lipid catabolic process(GO:0016042);positive regulation of vasoconstriction(GO:0045907);monoacylglycerol catabolic process(GO:0052651)	endoplasmic reticulum(GO:0005783);Golgi apparatus(GO:0005794);membrane(GO:0016020);organelle membrane(GO:0031090)	Arachidonic acid metabolism;Fatty acid metabolism;Metabolism of lipids;Metabolism					Mus musculus
MOUSE|MGI=MGI=1915010|UniProtKB=Q8CFE6	Q8CFE6	Sodium-coupled neutral amino acid transporter 2;Slc38a2;PTN000536524;orthologs	SODIUM-COUPLED NEUTRAL AMINO ACID TRANSPORTER 2 (PTHR22950:SF207)	L-amino acid transmembrane transporter activity(GO:0015179);neutral L-amino acid transmembrane transporter activity(GO:0015175)	neutral amino acid transport(GO:0015804);amino acid transmembrane transport(GO:0003333)		amino acid transporter(PC00046)		amino acid:sodium symporter activity(GO:0005283);neutral L-amino acid:sodium symporter activity(GO:0005295);proline:sodium symporter activity(GO:0005298);amino acid transmembrane transporter activity(GO:0015171);acidic amino acid transmembrane transporter activity(GO:0015172);neutral L-amino acid transmembrane transporter activity(GO:0015175);L-glutamine transmembrane transporter activity(GO:0015…	amino acid transmembrane transport(GO:0003333);monoatomic ion transport(GO:0006811);sodium ion transport(GO:0006814);amino acid transport(GO:0006865);glutamine transport(GO:0006868);positive regulation of gene expression(GO:0010628);neutral amino acid transport(GO:0015804);proline transport(GO:0015824);L-serine transport(GO:0015825);glycine betaine transport(GO:0031460);alanine transport(GO:00323…	cytoplasm(GO:0005737);plasma membrane(GO:0005886);brush border(GO:0005903);membrane(GO:0016020);axon(GO:0030424);dendrite(GO:0030425);sarcolemma(GO:0042383);neuronal cell body(GO:0043025)	Glutamate Neurotransmitter Release Cycle;Transmission across Chemical Synapses;Transport of small molecules;Transport of inorganic cations/anions and amino acids/oligopeptides;Amino acid transport across the plasma membrane;Neurotransmitter release cycle;SLC-mediated transmembrane transport;Neuronal System					Mus musculus
MOUSE|MGI=MGI=2145895|UniProtKB=Q8K2P7	Q8K2P7	Sodium-coupled neutral amino acid transporter 1;Slc38a1;PTN000536507;orthologs	SODIUM-COUPLED NEUTRAL AMINO ACID TRANSPORTER 1 (PTHR22950:SF184)	L-amino acid transmembrane transporter activity(GO:0015179);neutral L-amino acid transmembrane transporter activity(GO:0015175)	neutral amino acid transport(GO:0015804);amino acid transmembrane transport(GO:0003333)		amino acid transporter(PC00046)		amino acid:sodium symporter activity(GO:0005283);neutral L-amino acid:sodium symporter activity(GO:0005295);proline:sodium symporter activity(GO:0005298);L-amino acid transmembrane transporter activity(GO:0015179);L-glutamine transmembrane transporter activity(GO:0015186);symporter activity(GO:0015293);glycine:sodium symporter activity(GO:0015375);alanine:sodium symporter activity(GO:0015655)	amino acid transmembrane transport(GO:0003333);glutamine metabolic process(GO:0006541);monoatomic ion transport(GO:0006811);sodium ion transport(GO:0006814);amino acid transport(GO:0006865);glutamine transport(GO:0006868);gamma-aminobutyric acid biosynthetic process(GO:0009449);neutral amino acid transport(GO:0015804);regulation of synaptic transmission, GABAergic(GO:0032228);amino acid import(GO…	plasma membrane(GO:0005886);membrane(GO:0016020);basolateral plasma membrane(GO:0016323);axon(GO:0030424);neuronal cell body(GO:0043025);external side of apical plasma membrane(GO:0098591)	Transmission across Chemical Synapses;Transport of small molecules;Transport of inorganic cations/anions and amino acids/oligopeptides;Amino acid transport across the plasma membrane;Neurotransmitter uptake and metabolism In glial cells;SLC-mediated transmembrane transport;Astrocytic Glutamate-Glutamine Uptake And Metabolism;Neuronal System					Mus musculus
MOUSE|MGI=MGI=1915189|UniProtKB=Q9D820	Q9D820	Prolyl-tRNA synthetase associated domain-containing protein 1;Prorsd1;PTN000777283;orthologs	PROLYL-TRNA SYNTHETASE ASSOCIATED DOMAIN-CONTAINING PROTEIN 1-RELATED (PTHR31423:SF3)						aminoacyl-tRNA editing activity(GO:0002161);molecular_function(GO:0003674)	biological_process(GO:0008150)	cellular_component(GO:0005575)						Mus musculus
MOUSE|MGI=MGI=2444848|UniProtKB=Q8R2Y8	Q8R2Y8	Peptidyl-tRNA hydrolase 2, mitochondrial;Ptrh2;PTN000291378;orthologs	PEPTIDYL-TRNA HYDROLASE 2, MITOCHONDRIAL (PTHR12649:SF11)						aminoacyl-tRNA hydrolase activity(GO:0004045);hydrolase activity(GO:0016787)	negative regulation of gene expression(GO:0010629);positive regulation of anoikis(GO:2000210);negative regulation of anoikis(GO:2000811)	mitochondrion(GO:0005739);mitochondrial outer membrane(GO:0005741);cytosol(GO:0005829);membrane(GO:0016020)	Ub-specific processing proteases;Deubiquitination;Post-translational protein modification;Metabolism of proteins					Mus musculus
MOUSE|MGI=MGI=88271|UniProtKB=P24270	P24270	Catalase;Cat;PTN000157271;orthologs	CATALASE (PTHR11465:SF9)	antioxidant activity(GO:0016209);oxidoreductase activity, acting on peroxide as acceptor(GO:0016684);heme binding(GO:0020037)	response to organic substance(GO:0010033);organic substance catabolic process(GO:1901575);response to reactive oxygen species(GO:0000302);cellular catabolic process(GO:0044248)	cytoplasm(GO:0005737)	peroxidase(PC00180)		aminoacylase activity(GO:0004046);catalase activity(GO:0004096);peroxidase activity(GO:0004601);antioxidant activity(GO:0016209);oxidoreductase activity(GO:0016491);oxidoreductase activity, acting on peroxide as acceptor(GO:0016684);enzyme binding(GO:0019899);heme binding(GO:0020037);identical protein binding(GO:0042802);protein homodimerization activity(GO:0042803);metal ion binding(GO:0046872);…	response to reactive oxygen species(GO:0000302);ureteric bud development(GO:0001657);response to hypoxia(GO:0001666);kidney development(GO:0001822);triglyceride metabolic process(GO:0006641);response to oxidative stress(GO:0006979);cholesterol metabolic process(GO:0008203);aerobic respiration(GO:0009060);UV protection(GO:0009650);hemoglobin metabolic process(GO:0020027);negative regulation of NF-…	extracellular space(GO:0005615);cytoplasm(GO:0005737);mitochondrion(GO:0005739);peroxisome(GO:0005777);peroxisomal membrane(GO:0005778);peroxisomal matrix(GO:0005782);cytosol(GO:0005829);protein-containing complex(GO:0032991);intracellular membrane-bounded organelle(GO:0043231);catalase complex(GO:0062151)	Cellular responses to stimuli;Cellular response to chemical stress;Protein localization;Detoxification of Reactive Oxygen Species;Cellular responses to stress;Neutrophil degranulation;Immune System;Innate Immune System;Peroxisomal protein import					Mus musculus
MOUSE|MGI=MGI=87913|UniProtKB=Q99JW2	Q99JW2	Aminoacylase-1;Acy1;PTN000110494;orthologs	AMINOACYLASE-1 (PTHR45892:SF1)	hydrolase activity, acting on carbon-nitrogen (but not peptide) bonds, in linear amides(GO:0016811)					aminoacylase activity(GO:0004046);hydrolase activity(GO:0016787);identical protein binding(GO:0042802);metal ion binding(GO:0046872)	amino acid metabolic process(GO:0006520)	cytoplasm(GO:0005737);extracellular exosome(GO:0070062)	Aflatoxin activation and detoxification;Drug ADME;Paracetamol ADME;Metabolism;Biological oxidations					Mus musculus
MOUSE|MGI=MGI=2384902|UniProtKB=Q8VCT3	Q8VCT3	Aminopeptidase B;Rnpep;PTN000164318;orthologs	AMINOPEPTIDASE B (PTHR45726:SF1)	metalloaminopeptidase activity(GO:0070006)	proteolysis(GO:0006508)	extracellular space(GO:0005615)			aminopeptidase activity(GO:0004177);copper ion binding(GO:0005507);peptidase activity(GO:0008233);metallopeptidase activity(GO:0008237);zinc ion binding(GO:0008270);hydrolase activity(GO:0016787);peptide binding(GO:0042277);metal ion binding(GO:0046872);cobalt ion binding(GO:0050897);metalloaminopeptidase activity(GO:0070006)	proteolysis(GO:0006508);protein processing(GO:0016485);negative regulation of blood pressure(GO:0045776)	extracellular region(GO:0005576);extracellular space(GO:0005615);plasma membrane(GO:0005886);external side of plasma membrane(GO:0009897);secretory granule(GO:0030141)						Mus musculus
MOUSE|MGI=MGI=1345186|UniProtKB=Q8R016	Q8R016	Bleomycin hydrolase;Blmh;PTN000041096;orthologs	BLEOMYCIN HYDROLASE (PTHR10363:SF2)	aminopeptidase activity(GO:0004177);cysteine-type peptidase activity(GO:0008234)	alpha-amino acid metabolic process(GO:1901605);amino acid catabolic process(GO:0009063);sulfur compound catabolic process(GO:0044273);response to toxic substance(GO:0009636)	cytoplasm(GO:0005737)	cysteine protease(PC00081)		aminopeptidase activity(GO:0004177);cysteine-type endopeptidase activity(GO:0004197);peptidase activity(GO:0008233);cysteine-type peptidase activity(GO:0008234);hydrolase activity(GO:0016787);identical protein binding(GO:0042802);cysteine-type aminopeptidase activity(GO:0070005)	proteolysis(GO:0006508);response to xenobiotic stimulus(GO:0009410);response to toxic substance(GO:0009636);homocysteine catabolic process(GO:0043418)	cytoplasm(GO:0005737)	Immune System;Class I MHC mediated antigen processing & presentation;Antigen processing: Ubiquitination & Proteasome degradation;Adaptive Immune System					Mus musculus
MOUSE|MGI=MGI=96836|UniProtKB=P24527	P24527	Leukotriene A-4 hydrolase;Lta4h;PTN000164344;orthologs	LEUKOTRIENE A-4 HYDROLASE (PTHR45726:SF3)						aminopeptidase activity(GO:0004177);epoxide hydrolase activity(GO:0004301);leukotriene-A4 hydrolase activity(GO:0004463);protein binding(GO:0005515);peptidase activity(GO:0008233);metallopeptidase activity(GO:0008237);zinc ion binding(GO:0008270);hydrolase activity(GO:0016787);tripeptide aminopeptidase activity(GO:0045148);metal ion binding(GO:0046872);metalloaminopeptidase activity(GO:0070006)	proteolysis(GO:0006508);leukotriene metabolic process(GO:0006691);leukotriene biosynthetic process(GO:0019370);protein metabolic process(GO:0019538);peptide catabolic process(GO:0043171)	nucleus(GO:0005634);nucleoplasm(GO:0005654);cytoplasm(GO:0005737);cytosol(GO:0005829)	Biosynthesis of E-series 18(S)-resolvins;Biosynthesis of E-series 18(R)-resolvins;Arachidonic acid metabolism;Biosynthesis of EPA-derived SPMs;Biosynthesis of protectins;Biosynthesis of specialized proresolving mediators (SPMs);Biosynthesis of DHA-derived SPMs;Biosynthesis of D-series resolvins;Fatty acid metabolism;Neutrophil degranulation;Metabolism of lipids;Immune System;Synthesis of Leukotri…					Mus musculus
MOUSE|MGI=MGI=2445217|UniProtKB=B7ZMP1	B7ZMP1	Xaa-Pro aminopeptidase 3;Xpnpep3;PTN001650942;orthologs	XAA-PRO AMINOPEPTIDASE 3 (PTHR43226:SF4)	peptidase activity(GO:0008233)	proteolysis(GO:0006508)		metalloprotease(PC00153)		aminopeptidase activity(GO:0004177);hydrolase activity(GO:0016787);manganese ion binding(GO:0030145);protein homodimerization activity(GO:0042803);metal ion binding(GO:0046872);metalloaminopeptidase activity(GO:0070006)	glomerular filtration(GO:0003094);proteolysis(GO:0006508);protein processing(GO:0016485)	cytoplasm(GO:0005737);mitochondrion(GO:0005739);cytosol(GO:0005829)						Mus musculus
MOUSE|MGI=MGI=1922874|UniProtKB=Q8BP48	Q8BP48	Methionine aminopeptidase 1;Metap1;PTN000086287;orthologs	METHIONINE AMINOPEPTIDASE 1 (PTHR43330:SF7)	metalloaminopeptidase activity(GO:0070006)		cytosol(GO:0005829)	metalloprotease(PC00153)		aminopeptidase activity(GO:0004177);initiator methionyl aminopeptidase activity(GO:0004239);peptidase activity(GO:0008233);hydrolase activity(GO:0016787);metal ion binding(GO:0046872);metalloaminopeptidase activity(GO:0070006)	proteolysis(GO:0006508);protein maturation(GO:0051604)	cytoplasm(GO:0005737);cytosol(GO:0005829)	The phototransduction cascade;Sensory Perception;Visual phototransduction;Inactivation, recovery and regulation of the phototransduction cascade					Mus musculus
MOUSE|MGI=MGI=1929701|UniProtKB=O08663	O08663	Methionine aminopeptidase 2;Metap2;PTN000086576;orthologs	METHIONINE AMINOPEPTIDASE 2 (PTHR45777:SF2)	metalloexopeptidase activity(GO:0008235);aminopeptidase activity(GO:0004177)		cytoplasm(GO:0005737)	protease(PC00190)		aminopeptidase activity(GO:0004177);initiator methionyl aminopeptidase activity(GO:0004239);protein binding(GO:0005515);peptidase activity(GO:0008233);metalloexopeptidase activity(GO:0008235);hydrolase activity(GO:0016787);metal ion binding(GO:0046872);metalloaminopeptidase activity(GO:0070006)	proteolysis(GO:0006508);protein processing(GO:0016485);peptidyl-methionine modification(GO:0018206);N-terminal protein amino acid modification(GO:0031365)	cytoplasm(GO:0005737);cytosol(GO:0005829);plasma membrane(GO:0005886)	The phototransduction cascade;Sensory Perception;Visual phototransduction;Inactivation, recovery and regulation of the phototransduction cascade					Mus musculus
MOUSE|MGI=MGI=2448523|UniProtKB=Q6NSR8	Q6NSR8	Probable aminopeptidase NPEPL1;Npepl1;PTN000239200;orthologs	AMINOPEPTIDASE NPEPL1-RELATED (PTHR11963:SF4)	peptidase activity(GO:0008233)	proteolysis(GO:0006508)	cytoplasm(GO:0005737)	metalloprotease(PC00153)		aminopeptidase activity(GO:0004177);peptidase activity(GO:0008233);hydrolase activity(GO:0016787);manganese ion binding(GO:0030145);metal ion binding(GO:0046872);metalloaminopeptidase activity(GO:0070006)	proteolysis(GO:0006508);protein metabolic process(GO:0019538)	cytoplasm(GO:0005737)						Mus musculus
MOUSE|MGI=MGI=1914238|UniProtKB=Q9CPY7	Q9CPY7	Cytosol aminopeptidase;Lap3;PTN000239265;orthologs	CYTOSOL AMINOPEPTIDASE (PTHR11963:SF52)	peptidase activity(GO:0008233)	proteolysis(GO:0006508)	cytoplasm(GO:0005737)	metalloprotease(PC00153)		aminopeptidase activity(GO:0004177);peptidase activity(GO:0008233);hydrolase activity(GO:0016787);manganese ion binding(GO:0030145);metal ion binding(GO:0046872);metalloaminopeptidase activity(GO:0070006)	proteolysis(GO:0006508);protein metabolic process(GO:0019538)	cytoplasm(GO:0005737);mitochondrion(GO:0005739);trans-Golgi network(GO:0005802)						Mus musculus
MOUSE|MGI=MGI=1922471|UniProtKB=Q99KK7	Q99KK7	Dipeptidyl peptidase 3;Dpp3;PTN000603151;orthologs	DIPEPTIDYL PEPTIDASE 3 (PTHR23422:SF11)				metalloprotease(PC00153)		aminopeptidase activity(GO:0004177);peptidase activity(GO:0008233);metalloexopeptidase activity(GO:0008235);metallopeptidase activity(GO:0008237);dipeptidyl-peptidase activity(GO:0008239);zinc ion binding(GO:0008270);hydrolase activity(GO:0016787);metal ion binding(GO:0046872)	proteolysis(GO:0006508);protein catabolic process(GO:0030163)	cytoplasm(GO:0005737);cytosol(GO:0005829)						Mus musculus
MOUSE|MGI=MGI=2180003|UniProtKB=Q6P1B1	Q6P1B1	Xaa-Pro aminopeptidase 1;Xpnpep1;PTN000086110;orthologs	XAA-PRO AMINOPEPTIDASE 1 (PTHR43763:SF6)				protease(PC00190)		aminopeptidase activity(GO:0004177);peptidase activity(GO:0008233);metallopeptidase activity(GO:0008237);hydrolase activity(GO:0016787);manganese ion binding(GO:0030145);protein homodimerization activity(GO:0042803);metal ion binding(GO:0046872);metalloaminopeptidase activity(GO:0070006)	proteolysis(GO:0006508);bradykinin catabolic process(GO:0010815);negative regulation of programmed cell death(GO:0043069)	cytoplasm(GO:0005737);cytosol(GO:0005829)						Mus musculus
MOUSE|MGI=MGI=1278328|UniProtKB=Q9Z2W0	Q9Z2W0	Aspartyl aminopeptidase;Dnpep;PTN002004956;orthologs	ASPARTYL AMINOPEPTIDASE (PTHR28570:SF3)				metalloprotease(PC00153)		aminopeptidase activity(GO:0004177);peptidase activity(GO:0008233);metallopeptidase activity(GO:0008237);zinc ion binding(GO:0008270);hydrolase activity(GO:0016787);identical protein binding(GO:0042802);metal ion binding(GO:0046872)	proteolysis(GO:0006508)	cytoplasm(GO:0005737);cytosol(GO:0005829)						Mus musculus
MOUSE|MGI=MGI=1101358|UniProtKB=Q11011	Q11011	Puromycin-sensitive aminopeptidase;Npepps;PTN000164725;orthologs	PUROMYCIN-SENSITIVE AMINOPEPTIDASE-RELATED (PTHR11533:SF174)	zinc ion binding(GO:0008270);metalloaminopeptidase activity(GO:0070006);peptide binding(GO:0042277)	peptide catabolic process(GO:0043171)	cytoplasm(GO:0005737)	metalloprotease(PC00153)		aminopeptidase activity(GO:0004177);peptidase activity(GO:0008233);metallopeptidase activity(GO:0008237);zinc ion binding(GO:0008270);hydrolase activity(GO:0016787);peptide binding(GO:0042277);metal ion binding(GO:0046872);metalloaminopeptidase activity(GO:0070006)	proteolysis(GO:0006508);peptide catabolic process(GO:0043171);cellular response to hypoxia(GO:0071456)	extracellular space(GO:0005615);nucleus(GO:0005634);cytoplasm(GO:0005737);cytosol(GO:0005829);membrane(GO:0016020)	Immune System;Class I MHC mediated antigen processing & presentation;Antigen processing: Ubiquitination & Proteasome degradation;Adaptive Immune System					Mus musculus
MOUSE|MGI=MGI=1921638|UniProtKB=Q80YA7	Q80YA7	Dipeptidyl peptidase 8;Dpp8;PTN000198316;orthologs	DIPEPTIDYL PEPTIDASE 8 (PTHR11731:SF98)	exopeptidase activity(GO:0008238)	proteolysis(GO:0006508)		serine protease(PC00203)		aminopeptidase activity(GO:0004177);peptidase activity(GO:0008233);serine-type peptidase activity(GO:0008236);dipeptidyl-peptidase activity(GO:0008239);hydrolase activity(GO:0016787)	proteolysis(GO:0006508);negative regulation of programmed cell death(GO:0043069)	cytoplasm(GO:0005737);cytosol(GO:0005829)						Mus musculus
MOUSE|MGI=MGI=2443967|UniProtKB=Q8BVG4	Q8BVG4	Dipeptidyl peptidase 9;Dpp9;PTN000198335;orthologs	DIPEPTIDYL PEPTIDASE 9 (PTHR11731:SF109)	exopeptidase activity(GO:0008238)	proteolysis(GO:0006508)		serine protease(PC00203)		aminopeptidase activity(GO:0004177);peptidase activity(GO:0008233);serine-type peptidase activity(GO:0008236);dipeptidyl-peptidase activity(GO:0008239);hydrolase activity(GO:0016787);identical protein binding(GO:0042802)	proteolysis(GO:0006508);negative regulation of programmed cell death(GO:0043069);pyroptosis(GO:0070269)	cytoplasm(GO:0005737);cytosol(GO:0005829);microtubule(GO:0005874);cell leading edge(GO:0031252)						Mus musculus
MOUSE|MGI=MGI=2387123|UniProtKB=Q8C129	Q8C129	Leucyl-cystinyl aminopeptidase;Lnpep;PTN000164514;orthologs	LEUCYL-CYSTINYL AMINOPEPTIDASE (PTHR11533:SF42)	zinc ion binding(GO:0008270);metalloaminopeptidase activity(GO:0070006);peptide binding(GO:0042277)	peptide catabolic process(GO:0043171);signal transduction(GO:0007165);proteolysis(GO:0006508);regulation of blood pressure(GO:0008217)	cytoplasm(GO:0005737);plasma membrane(GO:0005886)	metalloprotease(PC00153)		aminopeptidase activity(GO:0004177);protein binding(GO:0005515);peptidase activity(GO:0008233);metallopeptidase activity(GO:0008237);zinc ion binding(GO:0008270);hydrolase activity(GO:0016787);peptide binding(GO:0042277);metal ion binding(GO:0046872);metalloaminopeptidase activity(GO:0070006)	proteolysis(GO:0006508);regulation of blood pressure(GO:0008217);response to hormone(GO:0009725);neuropeptide catabolic process(GO:0010813);protein catabolic process(GO:0030163);peptide catabolic process(GO:0043171);positive regulation of blood pressure(GO:0045777);regulation of long-term neuronal synaptic plasticity(GO:0048169);negative regulation of cold-induced thermogenesis(GO:0120163)	extracellular space(GO:0005615);cytoplasm(GO:0005737);plasma membrane(GO:0005886);cell surface(GO:0009986);membrane(GO:0016020);cytoplasmic vesicle membrane(GO:0030659);vesicle(GO:0031982);insulin-responsive compartment(GO:0032593);neuronal cell body(GO:0043025);perinuclear region of cytoplasm(GO:0048471)	Immune System;Class I MHC mediated antigen processing & presentation;Antigen processing: Ubiquitination & Proteasome degradation;Adaptive Immune System;Endosomal/Vacuolar pathway;Antigen processing-Cross presentation					Mus musculus
MOUSE|MGI=MGI=102724|UniProtKB=Q64514	Q64514	Tripeptidyl-peptidase 2;Tpp2;PTN000083326;orthologs	TRIPEPTIDYL-PEPTIDASE 2 (PTHR43806:SF14)	serine-type endopeptidase activity(GO:0004252);exopeptidase activity(GO:0008238)		cytosol(GO:0005829)	serine protease(PC00203)		aminopeptidase activity(GO:0004177);serine-type endopeptidase activity(GO:0004252);peptidase activity(GO:0008233);serine-type peptidase activity(GO:0008236);tripeptidyl-peptidase activity(GO:0008240);hydrolase activity(GO:0016787);peptide binding(GO:0042277);identical protein binding(GO:0042802)	proteolysis(GO:0006508);protein catabolic process(GO:0030163);intracellular amino acid homeostasis(GO:0080144)	nucleus(GO:0005634);nucleoplasm(GO:0005654);cytoplasm(GO:0005737);cytosol(GO:0005829);nuclear body(GO:0016604)	Immune System;Class I MHC mediated antigen processing & presentation;Antigen processing: Ubiquitination & Proteasome degradation;Adaptive Immune System					Mus musculus
MOUSE|MGI=MGI=1342283|UniProtKB=Q9WVL3	Q9WVL3	Solute carrier family 12 member 7;Slc12a7;PTN000214918;orthologs	SOLUTE CARRIER FAMILY 12 MEMBER 7 (PTHR11827:SF47)	potassium ion transmembrane transporter activity(GO:0015079);solute:monoatomic cation symporter activity(GO:0015294);chloride transmembrane transporter activity(GO:0015108)	potassium ion import across plasma membrane(GO:1990573);cellular homeostasis(GO:0019725);inorganic ion homeostasis(GO:0098771);chloride transmembrane transport(GO:1902476);regulation of cell size(GO:0008361);chemical synaptic transmission(GO:0007268);monoatomic cation homeostasis(GO:0055080)	plasma membrane(GO:0005886)	secondary carrier transporter(PC00258)		ammonium transmembrane transporter activity(GO:0008519);symporter activity(GO:0015293);potassium:chloride symporter activity(GO:0015379);protein kinase binding(GO:0019901);transmembrane transporter activity(GO:0022857)	monoatomic ion transport(GO:0006811);potassium ion transport(GO:0006813);cell volume homeostasis(GO:0006884);chemical synaptic transmission(GO:0007268);chloride ion homeostasis(GO:0055064);potassium ion homeostasis(GO:0055075);transmembrane transport(GO:0055085);cellular response to glucose stimulus(GO:0071333);potassium ion transmembrane transport(GO:0071805);ammonium import across plasma membra…	plasma membrane(GO:0005886);membrane(GO:0016020);protein-containing complex(GO:0032991)	Transport of small molecules;Transport of inorganic cations/anions and amino acids/oligopeptides;Cation-coupled Chloride cotransporters;SLC-mediated transmembrane transport					Mus musculus
MOUSE|MGI=MGI=88016|UniProtKB=Q9DBT5	Q9DBT5	AMP deaminase 2;Ampd2;PTN000144651;orthologs	AMP DEAMINASE 2 (PTHR11359:SF3)	hydrolase activity, acting on carbon-nitrogen (but not peptide) bonds, in cyclic amidines(GO:0016814);deaminase activity(GO:0019239)	purine ribonucleotide biosynthetic process(GO:0009152);IMP metabolic process(GO:0046040)	cytosol(GO:0005829)	deaminase(PC00088)		AMP deaminase activity(GO:0003876);hydrolase activity(GO:0016787);deaminase activity(GO:0019239);identical protein binding(GO:0042802);metal ion binding(GO:0046872)	IMP biosynthetic process(GO:0006188);nucleotide metabolic process(GO:0009117);purine ribonucleoside monophosphate biosynthetic process(GO:0009168);GMP salvage(GO:0032263);IMP salvage(GO:0032264);cholesterol homeostasis(GO:0042632);AMP metabolic process(GO:0046033);ATP metabolic process(GO:0046034);GTP metabolic process(GO:0046039);cyclic purine nucleotide metabolic process(GO:0052652);podocyte de…	cytosol(GO:0005829)	Nucleotide salvage;Metabolism;Purine salvage;Metabolism of nucleotides					Mus musculus
MOUSE|MGI=MGI=96611|UniProtKB=P11835	P11835	Integrin beta-2;Itgb2;PTN000008880;orthologs	INTEGRIN BETA-2 (PTHR10082:SF15)	integrin binding(GO:0005178);amyloid-beta binding(GO:0001540)	cell-matrix adhesion(GO:0007160);cell adhesion mediated by integrin(GO:0033627);integrin-mediated signaling pathway(GO:0007229);cell migration(GO:0016477)	focal adhesion(GO:0005925);plasma membrane signaling receptor complex(GO:0098802);cell surface(GO:0009986)	integrin(PC00126)	Inflammation mediated by chemokine and cytokine signaling pathway->Integrin;;Integrin signalling pathway->Integrin beta;;;	amyloid-beta binding(GO:0001540);complement component C3b binding(GO:0001851);integrin binding(GO:0005178);protein binding(GO:0005515);protein kinase binding(GO:0019901);ICAM-3 receptor activity(GO:0030369);heat shock protein binding(GO:0031072);cargo receptor activity(GO:0038024);protein-containing complex binding(GO:0044877);metal ion binding(GO:0046872);cell adhesion molecule binding(GO:005083…	leukocyte migration involved in inflammatory response(GO:0002523);receptor-mediated endocytosis(GO:0006898);phagocytosis(GO:0006909);phagocytosis, engulfment(GO:0006911);cell adhesion(GO:0007155);leukocyte cell-cell adhesion(GO:0007159);cell-matrix adhesion(GO:0007160);integrin-mediated signaling pathway(GO:0007229);neutrophil chemotaxis(GO:0030593);receptor internalization(GO:0031623);positive r…	plasma membrane(GO:0005886);focal adhesion(GO:0005925);integrin complex(GO:0008305);external side of plasma membrane(GO:0009897);cell surface(GO:0009986);membrane(GO:0016020);integrin alphaL-beta2 complex(GO:0034687);integrin alphaM-beta2 complex(GO:0034688);receptor complex(GO:0043235);plasma membrane raft(GO:0044853);membrane raft(GO:0045121)	Adaptive Immune System;Toll Like Receptor 4 (TLR4) Cascade;Toll-like Receptor Cascades;Integrin cell surface interactions;Neutrophil degranulation;Immune System;Hemostasis;Immunoregulatory interactions between a Lymphoid and a non-Lymphoid cell;Innate Immune System;Extracellular matrix organization;Cell surface interactions at the vascular wall					Mus musculus
MOUSE|MGI=MGI=96015|UniProtKB=P01942	P01942	Hemoglobin subunit alpha;Hba;PTN001351091;orthologs	HEMOGLOBIN SUBUNIT ALPHA (PTHR11442:SF48)	protein binding(GO:0005515);antioxidant activity(GO:0016209);organic acid binding(GO:0043177);oxidoreductase activity, acting on peroxide as acceptor(GO:0016684);heme binding(GO:0020037)	organic substance catabolic process(GO:1901575);cellular catabolic process(GO:0044248)	extracellular space(GO:0005615);cytosol(GO:0005829);protein-containing complex(GO:0032991)	globin(PC00107)		amyloid-beta binding(GO:0001540);G protein-coupled receptor binding(GO:0001664);peroxidase activity(GO:0004601);oxygen carrier activity(GO:0005344);oxygen binding(GO:0019825);heme binding(GO:0020037);haptoglobin binding(GO:0031720);organic acid binding(GO:0043177);protein-containing complex binding(GO:0044877)	in utero embryonic development(GO:0001701);response to bacterium(GO:0009617);carbon dioxide transport(GO:0015670);response to stilbenoid(GO:0035634);hydrogen peroxide catabolic process(GO:0042744);erythrocyte development(GO:0048821)	extracellular space(GO:0005615);hemoglobin complex(GO:0005833);haptoglobin-hemoglobin complex(GO:0031838);myelin sheath(GO:0043209)	Cytoprotection by HMOX1;Cellular responses to stimuli;Cellular response to chemical stress;Cellular responses to stress;Erythrocytes take up carbon dioxide and release oxygen;Transport of small molecules;Vesicle-mediated transport;Erythrocytes take up oxygen and release carbon dioxide;Binding and Uptake of Ligands by Scavenger Receptors;Scavenging of heme from plasma;O2/CO2 exchange in erythrocyt…					Mus musculus
MOUSE|MGI=MGI=1277979|UniProtKB=Q3UV74	Q3UV74	Integrin beta-2-like protein;Itgb2l;PTN000008877;orthologs	INTEGRIN BETA-2 (PTHR10082:SF15)	integrin binding(GO:0005178);amyloid-beta binding(GO:0001540)	cell-matrix adhesion(GO:0007160);cell adhesion mediated by integrin(GO:0033627);integrin-mediated signaling pathway(GO:0007229);cell migration(GO:0016477)	focal adhesion(GO:0005925);plasma membrane signaling receptor complex(GO:0098802);cell surface(GO:0009986)	integrin(PC00126)	Inflammation mediated by chemokine and cytokine signaling pathway->Integrin;;Integrin signalling pathway->Integrin beta;;;	amyloid-beta binding(GO:0001540);integrin binding(GO:0005178);protein kinase binding(GO:0019901);ICAM-3 receptor activity(GO:0030369);heat shock protein binding(GO:0031072);protein-containing complex binding(GO:0044877);cell adhesion molecule binding(GO:0050839)	leukocyte migration involved in inflammatory response(GO:0002523);inflammatory response(GO:0006954);cell adhesion(GO:0007155);leukocyte cell-cell adhesion(GO:0007159);cell-matrix adhesion(GO:0007160);integrin-mediated signaling pathway(GO:0007229);neutrophil chemotaxis(GO:0030593);positive regulation of superoxide anion generation(GO:0032930);cell adhesion mediated by integrin(GO:0033627);heterot…	plasma membrane(GO:0005886);focal adhesion(GO:0005925);integrin complex(GO:0008305);cell surface(GO:0009986);membrane(GO:0016020);secretory granule(GO:0030141);integrin alphaL-beta2 complex(GO:0034687);plasma membrane raft(GO:0044853)						Mus musculus
MOUSE|MGI=MGI=97769|UniProtKB=P04925	P04925	Major prion protein;Prnp;PTN000162602;orthologs	MAJOR PRION PROTEIN (PTHR15506:SF2)						amyloid-beta binding(GO:0001540);protease binding(GO:0002020);copper ion binding(GO:0005507);protein binding(GO:0005515);lamin binding(GO:0005521);glycosaminoglycan binding(GO:0005539);microtubule binding(GO:0008017);tubulin binding(GO:0015631);aspartic-type endopeptidase inhibitor activity(GO:0019828);type 5 metabotropic glutamate receptor binding(GO:0031802);signaling receptor activity(GO:00380…	negative regulation of protein phosphorylation(GO:0001933);nucleobase-containing compound metabolic process(GO:0006139);intracellular copper ion homeostasis(GO:0006878);response to oxidative stress(GO:0006979);learning or memory(GO:0007611);protein destabilization(GO:0031648);activation of protein kinase activity(GO:0032147);negative regulation of type II interferon production(GO:0032689);negativ…	mitochondrial outer membrane(GO:0005741);endoplasmic reticulum(GO:0005783);Golgi apparatus(GO:0005794);cytosol(GO:0005829);plasma membrane(GO:0005886);cell surface(GO:0009986);postsynaptic density(GO:0014069);membrane(GO:0016020);inclusion body(GO:0016234);dendrite(GO:0030425);nuclear membrane(GO:0031965);terminal bouton(GO:0043195);intracellular membrane-bounded organelle(GO:0043231);membrane ra…	Protein localization;Insertion of tail-anchored proteins into the endoplasmic reticulum membrane					Mus musculus
MOUSE|MGI=MGI=102519|UniProtKB=P21460	P21460	Cystatin-C;Cst3;PTN000151637;orthologs	CYSTATIN-C (PTHR46186:SF6)	cysteine-type endopeptidase inhibitor activity(GO:0004869)	negative regulation of cysteine-type endopeptidase activity(GO:2000117)	extracellular space(GO:0005615);cytoplasm(GO:0005737);vesicle(GO:0031982)	protease inhibitor(PC00191)		amyloid-beta binding(GO:0001540);protease binding(GO:0002020);endopeptidase inhibitor activity(GO:0004866);cysteine-type endopeptidase inhibitor activity(GO:0004869);peptidase inhibitor activity(GO:0030414);identical protein binding(GO:0042802)	defense response(GO:0006952);positive regulation of cell population proliferation(GO:0008284);negative regulation of peptidase activity(GO:0010466);negative regulation of collagen catabolic process(GO:0010711);negative regulation of extracellular matrix disassembly(GO:0010716);regulation of tissue remodeling(GO:0034103);cellular response to oxidative stress(GO:0034599);positive regulation of DNA …	extracellular region(GO:0005576);basement membrane(GO:0005604);extracellular space(GO:0005615);cytoplasm(GO:0005737);multivesicular body(GO:0005771);Golgi apparatus(GO:0005794);plasma membrane(GO:0005886);axon(GO:0030424);nuclear membrane(GO:0031965);vesicle(GO:0031982);cell projection(GO:0042995);neuronal cell body(GO:0043025);contractile fiber(GO:0043292);perinuclear region of cytoplasm(GO:0048…	Immune System;Post-translational protein phosphorylation;Innate Immune System;Regulation of Insulin-like Growth Factor (IGF) transport and uptake by Insulin-like Growth Factor Binding Proteins (IGFBPs);Post-translational protein modification;Neutrophil degranulation;Metabolism of proteins					Mus musculus
MOUSE|MGI=MGI=96765|UniProtKB=P35951	P35951	Low-density lipoprotein receptor;Ldlr;PTN000056422;orthologs	LOW-DENSITY LIPOPROTEIN RECEPTOR (PTHR24270:SF21)	low-density lipoprotein particle receptor activity(GO:0005041);lipoprotein particle binding(GO:0071813)	intracellular cholesterol transport(GO:0032367);cholesterol homeostasis(GO:0042632);receptor-mediated endocytosis(GO:0006898)	early endosome(GO:0005769);plasma membrane(GO:0005886)	apolipoprotein(PC00052)		amyloid-beta binding(GO:0001540);protease binding(GO:0002020);low-density lipoprotein particle receptor activity(GO:0005041);calcium ion binding(GO:0005509);protein binding(GO:0005515);low-density lipoprotein particle binding(GO:0030169);very-low-density lipoprotein particle receptor activity(GO:0030229);identical protein binding(GO:0042802);molecular adaptor activity(GO:0060090);lipoprotein part…	negative regulation of receptor recycling(GO:0001920);lipid metabolic process(GO:0006629);lipid transport(GO:0006869);endocytosis(GO:0006897);receptor-mediated endocytosis(GO:0006898);phagocytosis(GO:0006909);long-term memory(GO:0007616);steroid metabolic process(GO:0008202);cholesterol metabolic process(GO:0008203);positive regulation of gene expression(GO:0010628);negative regulation of gene ex…	extracellular space(GO:0005615);lysosome(GO:0005764);endosome(GO:0005768);early endosome(GO:0005769);late endosome(GO:0005770);Golgi apparatus(GO:0005794);plasma membrane(GO:0005886);caveola(GO:0005901);clathrin-coated pit(GO:0005905);external side of plasma membrane(GO:0009897);cell surface(GO:0009986);membrane(GO:0016020);basolateral plasma membrane(GO:0016323);low-density lipoprotein particle(…	Clathrin-mediated endocytosis;Chylomicron clearance;Membrane Trafficking;Cargo recognition for clathrin-mediated endocytosis;Transport of small molecules;Vesicle-mediated transport;Plasma lipoprotein clearance;LDL clearance;Plasma lipoprotein assembly, remodeling, and clearance					Mus musculus
MOUSE|MGI=MGI=1309517|UniProtKB=O89051	O89051	Integral membrane protein 2B;Itm2b;PTN000103194;orthologs	INTEGRAL MEMBRANE PROTEIN 2B (PTHR10962:SF4)	amyloid-beta binding(GO:0001540)	negative regulation of macromolecule biosynthetic process(GO:0010558);negative regulation of protein metabolic process(GO:0051248)	extracellular space(GO:0005615);vesicle(GO:0031982);Golgi apparatus(GO:0005794);plasma membrane(GO:0005886)			amyloid-beta binding(GO:0001540);protein binding(GO:0005515);ATP binding(GO:0005524)	negative regulation of amyloid precursor protein biosynthetic process(GO:0042985)	extracellular region(GO:0005576);extracellular space(GO:0005615);endosome(GO:0005768);Golgi apparatus(GO:0005794);plasma membrane(GO:0005886);membrane(GO:0016020);Golgi-associated vesicle membrane(GO:0030660);organelle membrane(GO:0031090);intracellular membrane-bounded organelle(GO:0043231)						Mus musculus
MOUSE|MGI=MGI=95908|UniProtKB=Q03958	Q03958	Prefoldin subunit 6;Pfdn6;PTN000484545;orthologs	PREFOLDIN SUBUNIT 6 (PTHR21431:SF0)	protein-folding chaperone binding(GO:0051087)	chaperone-mediated protein complex assembly(GO:0051131);protein folding(GO:0006457)	cytoplasm(GO:0005737);protein-containing complex(GO:0032991)			amyloid-beta binding(GO:0001540);protein binding(GO:0005515);unfolded protein binding(GO:0051082);protein-folding chaperone binding(GO:0051087)	protein folding(GO:0006457);chaperone-mediated protein complex assembly(GO:0051131);negative regulation of amyloid fibril formation(GO:1905907)	cytoplasm(GO:0005737);prefoldin complex(GO:0016272);RPAP3/R2TP/prefoldin-like complex(GO:1990062)						Mus musculus
MOUSE|MGI=MGI=1276111|UniProtKB=O70591	O70591	Prefoldin subunit 2;Pfdn2;PTN000329584;orthologs	PREFOLDIN SUBUNIT 2 (PTHR13303:SF0)		protein folding(GO:0006457)	cytoplasm(GO:0005737)	chaperone(PC00072)		amyloid-beta binding(GO:0001540);protein folding chaperone(GO:0044183);unfolded protein binding(GO:0051082)	protein folding(GO:0006457);positive regulation of cytoskeleton organization(GO:0051495);negative regulation of amyloid fibril formation(GO:1905907)	nucleus(GO:0005634);cytoplasm(GO:0005737);mitochondrion(GO:0005739);cytosol(GO:0005829);prefoldin complex(GO:0016272);RPAP3/R2TP/prefoldin-like complex(GO:1990062)						Mus musculus
MOUSE|MGI=MGI=1914449|UniProtKB=Q9CWM4	Q9CWM4	Prefoldin subunit 1;Pfdn1;PTN000467420;orthologs	PREFOLDIN SUBUNIT 1 (PTHR20903:SF0)	unfolded protein binding(GO:0051082)	protein folding(GO:0006457)	cytoplasm(GO:0005737)	chaperone(PC00072)		amyloid-beta binding(GO:0001540);protein folding chaperone(GO:0044183);unfolded protein binding(GO:0051082)	protein folding(GO:0006457);telencephalon development(GO:0021537);cerebellum development(GO:0021549);actin cytoskeleton organization(GO:0030036);B cell activation(GO:0042113);negative regulation of amyloid fibril formation(GO:1905907)	cytoplasm(GO:0005737);prefoldin complex(GO:0016272)						Mus musculus
MOUSE|MGI=MGI=1202296|UniProtKB=O88307	O88307	Sortilin-related receptor;Sorl1;PTN000251052;orthologs	SORTILIN-RELATED RECEPTOR (PTHR12106:SF20)		maintenance of location in cell(GO:0051651);protein localization to Golgi apparatus(GO:0034067);post-Golgi vesicle-mediated transport(GO:0006892);protein targeting to lysosome(GO:0006622)	Golgi apparatus(GO:0005794)	membrane traffic protein(PC00150)		amyloid-beta binding(GO:0001540);transmembrane signaling receptor activity(GO:0004888);protein binding(GO:0005515);aspartic-type endopeptidase inhibitor activity(GO:0019828);low-density lipoprotein particle binding(GO:0030169);small GTPase binding(GO:0031267);neuropeptide binding(GO:0042923)	diet induced thermogenesis(GO:0002024);protein targeting(GO:0006605);protein targeting to lysosome(GO:0006622);post-Golgi vesicle-mediated transport(GO:0006892);endocytosis(GO:0006897);receptor-mediated endocytosis(GO:0006898);neuropeptide signaling pathway(GO:0007218);multicellular organism development(GO:0007275);negative regulation of triglyceride catabolic process(GO:0010897);regulation of sm…	extracellular region(GO:0005576);extracellular space(GO:0005615);nuclear envelope lumen(GO:0005641);endosome(GO:0005768);early endosome(GO:0005769);multivesicular body(GO:0005771);endoplasmic reticulum(GO:0005783);Golgi apparatus(GO:0005794);trans-Golgi network(GO:0005802);plasma membrane(GO:0005886);cell surface(GO:0009986);membrane(GO:0016020);cytoplasmic vesicle(GO:0031410);Golgi cisterna(GO:0…						Mus musculus
MOUSE|MGI=MGI=1333804|UniProtKB=P61759	P61759	Prefoldin subunit 3;Vbp1;PTN000274596;orthologs	PREFOLDIN SUBUNIT 3 (PTHR12409:SF0)	tubulin binding(GO:0015631)	protein-containing complex assembly(GO:0065003);microtubule-based process(GO:0007017)	polysome(GO:0005844);cytoplasm(GO:0005737)	chaperone(PC00072)		amyloid-beta binding(GO:0001540);tubulin binding(GO:0015631);unfolded protein binding(GO:0051082)	protein folding(GO:0006457);microtubule-based process(GO:0007017);tubulin complex assembly(GO:0007021);negative regulation of amyloid fibril formation(GO:1905907)	nucleus(GO:0005634);cytoplasm(GO:0005737);cytosol(GO:0005829);prefoldin complex(GO:0016272);intracellular membrane-bounded organelle(GO:0043231)						Mus musculus
MOUSE|MGI=MGI=1928753|UniProtKB=Q9WU28	Q9WU28	Prefoldin subunit 5;Pfdn5;PTN000293194;orthologs	PREFOLDIN SUBUNIT 5 (PTHR12674:SF2)			cytoplasm(GO:0005737);protein-containing complex(GO:0032991)	chaperone(PC00072)		amyloid-beta binding(GO:0001540);unfolded protein binding(GO:0051082)	protein folding(GO:0006457);negative regulation of DNA-templated transcription(GO:0045892);retina development in camera-type eye(GO:0060041);negative regulation of canonical Wnt signaling pathway(GO:0090090);negative regulation of amyloid fibril formation(GO:1905907);RNA polymerase I assembly(GO:1990113);RNA polymerase II core complex assembly(GO:1990114);RNA polymerase III assembly(GO:1990115)	nucleus(GO:0005634);cytoplasm(GO:0005737);cytosol(GO:0005829);prefoldin complex(GO:0016272);intermediate filament cytoskeleton(GO:0045111)						Mus musculus
MOUSE|MGI=MGI=98725|UniProtKB=P04202	P04202	Transforming growth factor beta-1 proprotein;Tgfb1;PTN000218767;orthologs	TRANSFORMING GROWTH FACTOR BETA-1 PROPROTEIN (PTHR11848:SF125)	cytokine activity(GO:0005125)	transforming growth factor beta receptor signaling pathway(GO:0007179);regulation of cell population proliferation(GO:0042127)	extracellular space(GO:0005615)	growth factor(PC00112)	TGF-beta signaling pathway->Transforming growth factor beta;;Gonadotropin-releasing hormone receptor pathway->TGFbeta;;;	antigen binding(GO:0003823);type II transforming growth factor beta receptor binding(GO:0005114);cytokine activity(GO:0005125);transforming growth factor beta receptor binding(GO:0005160);protein binding(GO:0005515);growth factor activity(GO:0008083);enzyme binding(GO:0019899);type I transforming growth factor beta receptor binding(GO:0034713);type III transforming growth factor beta receptor bin…	negative regulation of transcription by RNA polymerase II(GO:0000122);cell morphogenesis(GO:0000902);skeletal system development(GO:0001501);vasculogenesis(GO:0001570);ureteric bud development(GO:0001657);morphogenesis of a branching structure(GO:0001763);cell activation(GO:0001775);epithelial to mesenchymal transition(GO:0001837);neural tube closure(GO:0001843);negative regulation of protein pho…	extracellular region(GO:0005576);extracellular space(GO:0005615);nucleus(GO:0005634);cytoplasm(GO:0005737);microvillus(GO:0005902);cell surface(GO:0009986);secretory granule(GO:0030141);axon(GO:0030424);extracellular matrix(GO:0031012);neuronal cell body(GO:0043025);collagen-containing extracellular matrix(GO:0062023)	Elastic fibre formation;Generic Transcription Pathway;Cell surface interactions at the vascular wall;Platelet degranulation ;Transcriptional regulation by RUNX3;Gene expression (Transcription);TGF-beta receptor signaling activates SMADs;Signal Transduction;Downregulation of TGF-beta receptor signaling;Regulation of RUNX3 expression and activity;Extracellular matrix organization;RUNX3 regulates CD…					Mus musculus
MOUSE|MGI=MGI=1921086|UniProtKB=Q91ZN5	Q91ZN5	Adenosine 3'-phospho 5'-phosphosulfate transporter 1;Slc35b2;PTN000081371;orthologs	ADENOSINE 3'-PHOSPHO 5'-PHOSPHOSULFATE TRANSPORTER 1 (PTHR10778:SF13)	organic anion transmembrane transporter activity(GO:0008514);carbohydrate derivative transmembrane transporter activity(GO:1901505);purine nucleotide transmembrane transporter activity(GO:0015216)			secondary carrier transporter(PC00258)		antiporter activity(GO:0015297);3'-phosphoadenosine 5'-phosphosulfate transmembrane transporter activity(GO:0046964)	chondroitin sulfate biosynthetic process(GO:0030206);3'-phosphoadenosine 5'-phosphosulfate transport(GO:0046963);transmembrane transport(GO:0055085);3'-phospho-5'-adenylyl sulfate transmembrane transport(GO:1902559)	Golgi membrane(GO:0000139);Golgi apparatus(GO:0005794);membrane(GO:0016020)	Phase II - Conjugation of compounds;Transport of nucleotide sugars;Biological oxidations;Transport of vitamins, nucleosides, and related molecules;Transport of small molecules;Transport and synthesis of PAPS;SLC-mediated transmembrane transport;Metabolism;Cytosolic sulfonation of small molecules;Metabolism of carbohydrates;Glycosaminoglycan metabolism					Mus musculus
MOUSE|MGI=MGI=1932557|UniProtKB=Q9Z2I0	Q9Z2I0	Mitochondrial proton_calcium exchanger protein;Letm1;PTN000361007;orthologs	MITOCHONDRIAL PROTON_CALCIUM EXCHANGER PROTEIN (PTHR14009:SF8)				secondary carrier transporter(PC00258)		antiporter activity(GO:0015297);calcium:proton antiporter activity(GO:0015369);ribosome binding(GO:0043022);metal ion binding(GO:0046872)	monoatomic ion transport(GO:0006811);potassium ion transport(GO:0006813);calcium ion transport(GO:0006816);mitochondrial calcium ion transmembrane transport(GO:0006851);inner mitochondrial membrane organization(GO:0007007);protein hexamerization(GO:0034214);cristae formation(GO:0042407);protein homooligomerization(GO:0051260);mitochondrial calcium ion homeostasis(GO:0051560);negative regulation o…	mitochondrion(GO:0005739);mitochondrial inner membrane(GO:0005743);membrane(GO:0016020)	RHOG GTPase cycle;RHO GTPase cycle;Signaling by Rho GTPases, Miro GTPases and RHOBTB3;Signal Transduction;Signaling by Rho GTPases					Mus musculus
MOUSE|MGI=MGI=2679732|UniProtKB=Q8BZ00	Q8BZ00	Sodium_hydrogen exchanger 9;Slc9a9;PTN000011843;orthologs	SODIUM_HYDROGEN EXCHANGER 9 (PTHR10110:SF61)	potassium ion transmembrane transporter activity(GO:0015079);sodium ion transmembrane transporter activity(GO:0015081);metal cation:proton antiporter activity(GO:0051139)	regulation of intracellular pH(GO:0051453);potassium ion transmembrane transport(GO:0071805);import into cell(GO:0098657);sodium ion transmembrane transport(GO:0035725)	recycling endosome(GO:0055037);plasma membrane(GO:0005886)	secondary carrier transporter(PC00258)		antiporter activity(GO:0015297);sodium:proton antiporter activity(GO:0015385);potassium:proton antiporter activity(GO:0015386)	monoatomic ion transport(GO:0006811);monoatomic cation transport(GO:0006812);sodium ion transport(GO:0006814);regulation of pH(GO:0006885);sodium ion transmembrane transport(GO:0035725);defense response to bacterium(GO:0042742);regulation of intracellular pH(GO:0051453);transmembrane transport(GO:0055085);potassium ion transmembrane transport(GO:0071805);phagosome maturation(GO:0090382);sodium io…	endosome(GO:0005768);early endosome(GO:0005769);plasma membrane(GO:0005886);membrane(GO:0016020);phagocytic vesicle membrane(GO:0030670);cytoplasmic vesicle(GO:0031410);early phagosome(GO:0032009);recycling endosome(GO:0055037);recycling endosome membrane(GO:0055038)	Transport of small molecules;Transport of inorganic cations/anions and amino acids/oligopeptides;Sodium/Proton exchangers;SLC-mediated transmembrane transport					Mus musculus
MOUSE|MGI=MGI=1333870|UniProtKB=Q9Z2A5	Q9Z2A5	Arginyl-tRNA--protein transferase 1;Ate1;PTN000483010;orthologs	ARGINYL-TRNA--PROTEIN TRANSFERASE 1 (PTHR21367:SF1)	aminoacyltransferase activity(GO:0016755)	protein modification process(GO:0036211);ubiquitin-dependent protein catabolic process(GO:0006511)	cytoplasm(GO:0005737)	translational protein(PC00263)		arginyl-tRNA--protein transferase activity(GO:0004057);protein binding(GO:0005515);transferase activity(GO:0016740);acyltransferase activity(GO:0016746)	proteasomal protein catabolic process(GO:0010498);protein arginylation(GO:0016598)	nucleus(GO:0005634);cytoplasm(GO:0005737)						Mus musculus
MOUSE|MGI=MGI=109201|UniProtKB=P50295	P50295	Arylamine N-acetyltransferase 2;Nat2;PTN000209398;orthologs	ARYLAMINE N-ACETYLTRANSFERASE 1 (PTHR11786:SF8)	N-acetyltransferase activity(GO:0008080)			acetyltransferase(PC00038)		arylamine N-acetyltransferase activity(GO:0004060);N-acetyltransferase activity(GO:0008080);acetyltransferase activity(GO:0016407);transferase activity(GO:0016740);acyltransferase activity(GO:0016746)		cytoplasm(GO:0005737)	Phase II - Conjugation of compounds;Drug ADME;Paracetamol ADME;Metabolism;Biological oxidations;Acetylation					Mus musculus
MOUSE|MGI=MGI=1919131|UniProtKB=Q9D7N9	Q9D7N9	Adipocyte plasma membrane-associated protein;Apmap;PTN000046352;orthologs	ADIPOCYTE PLASMA MEMBRANE-ASSOCIATED PROTEIN (PTHR10426:SF130)	carboxylic ester hydrolase activity(GO:0052689)		endomembrane system(GO:0012505)			arylesterase activity(GO:0004064);strictosidine synthase activity(GO:0016844)	biosynthetic process(GO:0009058)	cell surface(GO:0009986);membrane(GO:0016020)						Mus musculus
MOUSE|MGI=MGI=98438|UniProtKB=P50427	P50427	Steryl-sulfatase;Sts;PTN001619951;orthologs	STERYL-SULFATASE (PTHR42693:SF9)	hydrolase activity, acting on ester bonds(GO:0016788)			hydrolase(PC00121)		arylsulfatase activity(GO:0004065);steryl-sulfatase activity(GO:0004773);sulfuric ester hydrolase activity(GO:0008484);hydrolase activity(GO:0016787);metal ion binding(GO:0046872)	lipid metabolic process(GO:0006629);female pregnancy(GO:0007565);learning or memory(GO:0007611);steroid metabolic process(GO:0008202);positive regulation of cell population proliferation(GO:0008284);response to pH(GO:0009268);response to organic cyclic compound(GO:0014070);response to peptide hormone(GO:0043434);response to estrogen(GO:0043627)	nuclear envelope(GO:0005635);endoplasmic reticulum(GO:0005783);endoplasmic reticulum membrane(GO:0005789);membrane(GO:0016020);intracellular membrane-bounded organelle(GO:0043231)						Mus musculus
MOUSE|MGI=MGI=1355303|UniProtKB=Q571E4	Q571E4	N-acetylgalactosamine-6-sulfatase;Galns;PTN000038565;orthologs	N-ACETYLGALACTOSAMINE-6-SULFATASE (PTHR42693:SF50)	hydrolase activity, acting on ester bonds(GO:0016788)			hydrolase(PC00121)		arylsulfatase activity(GO:0004065);sulfuric ester hydrolase activity(GO:0008484);hydrolase activity(GO:0016787);N-acetylgalactosamine-6-sulfatase activity(GO:0043890);metal ion binding(GO:0046872)	chondroitin sulfate catabolic process(GO:0030207)	lysosome(GO:0005764)	Keratan sulfate/keratin metabolism;Immune System;Keratan sulfate degradation;Innate Immune System;Metabolism of carbohydrates;Metabolism;Neutrophil degranulation;Glycosaminoglycan metabolism					Mus musculus
MOUSE|MGI=MGI=1913764|UniProtKB=Q8C0M9	Q8C0M9	Isoaspartyl peptidase_L-asparaginase;Asrgl1;PTN000022598;orthologs	ISOASPARTYL PEPTIDASE_L-ASPARAGINASE (PTHR10188:SF41)	hydrolase activity, acting on carbon-nitrogen (but not peptide) bonds, in linear amides(GO:0016811);peptidase activity(GO:0008233)	amino acid catabolic process(GO:0009063);aspartate family amino acid metabolic process(GO:0009066)	cytoplasm(GO:0005737)	protease(PC00190)		asparaginase activity(GO:0004067);peptidase activity(GO:0008233);beta-aspartyl-peptidase activity(GO:0008798);hydrolase activity(GO:0016787)	proteolysis(GO:0006508);asparagine catabolic process via L-aspartate(GO:0033345)	photoreceptor inner segment(GO:0001917);cytoplasm(GO:0005737)	Phenylalanine metabolism;Phenylalanine and tyrosine metabolism;Metabolism;Metabolism of amino acids and derivatives					Mus musculus
MOUSE|MGI=MGI=1917244|UniProtKB=A2ADY9	A2ADY9	Protein DDI1 homolog 2;Ddi2;PTN000308644;orthologs	PROTEIN DDI1 HOMOLOG 2 (PTHR12917:SF13)				aspartic protease(PC00053)		aspartic-type endopeptidase activity(GO:0004190);identical protein binding(GO:0042802);ubiquitin binding(GO:0043130)	proteasomal protein catabolic process(GO:0010498);protein processing(GO:0016485);regulation of protein stability(GO:0031647);cellular response to hydroxyurea(GO:0072711);regulation of DNA stability(GO:0097752)	nucleoplasm(GO:0005654);cytosol(GO:0005829)						Mus musculus
MOUSE|MGI=MGI=1914434|UniProtKB=Q9ERS2	Q9ERS2	NADH dehydrogenase [ubiquinone] 1 alpha subcomplex subunit 13;Ndufa13;PTN000311542;orthologs	NADH DEHYDROGENASE [UBIQUINONE] 1 ALPHA SUBCOMPLEX SUBUNIT 13 (PTHR12966:SF0)			mitochondrial respiratory chain complex I(GO:0005747)	dehydrogenase(PC00092)		ATP binding(GO:0005524)	apoptotic process(GO:0006915);aerobic respiration(GO:0009060);negative regulation of cell growth(GO:0030308);mitochondrial respiratory chain complex I assembly(GO:0032981);cellular response to interferon-beta(GO:0035458);proton motive force-driven mitochondrial ATP synthesis(GO:0042776);positive regulation of cysteine-type endopeptidase activity involved in apoptotic process(GO:0043280);protein i…	nucleus(GO:0005634);nucleoplasm(GO:0005654);cytoplasm(GO:0005737);mitochondrion(GO:0005739);mitochondrial inner membrane(GO:0005743);mitochondrial respirasome(GO:0005746);mitochondrial respiratory chain complex I(GO:0005747);membrane(GO:0016020);mitochondrial membrane(GO:0031966);synapse(GO:0045202);respirasome(GO:0070469)	Respiratory electron transport, ATP synthesis by chemiosmotic coupling, and heat production by uncoupling proteins.;Complex I biogenesis;Respiratory electron transport;The citric acid (TCA) cycle and respiratory electron transport;Metabolism					Mus musculus
MOUSE|MGI=MGI=104680|UniProtKB=Q64433	Q64433	10 kDa heat shock protein, mitochondrial;Hspe1;PTN000080706;orthologs	10 KDA HEAT SHOCK PROTEIN, MITOCHONDRIAL (PTHR10772:SF0)	metal ion binding(GO:0046872);protein-folding chaperone binding(GO:0051087);unfolded protein binding(GO:0051082)	chaperone cofactor-dependent protein refolding(GO:0051085)		chaperonin(PC00073)		ATP binding(GO:0005524);protein folding chaperone(GO:0044183);metal ion binding(GO:0046872);unfolded protein binding(GO:0051082);protein-folding chaperone binding(GO:0051087)	protein folding(GO:0006457);chaperone cofactor-dependent protein refolding(GO:0051085)	mitochondrion(GO:0005739);mitochondrial matrix(GO:0005759)	RHOG GTPase cycle;RHO GTPase cycle;Signaling by Rho GTPases, Miro GTPases and RHOBTB3;Signal Transduction;Signaling by Rho GTPases					Mus musculus
MOUSE|MGI=MGI=1354164|UniProtKB=Q99M31	Q99M31	Heat shock 70 kDa protein 14;Hspa14;PTN001092370;orthologs	HEAT SHOCK 70 KDA PROTEIN 14 (PTHR19375:SF438)			nucleus(GO:0005634);cytosol(GO:0005829);ribosome(GO:0005840);plasma membrane(GO:0005886)	Hsp70 family chaperone(PC00027)		ATP hydrolysis activity(GO:0016887);heat shock protein binding(GO:0031072);protein folding chaperone(GO:0044183)	protein refolding(GO:0042026);chaperone cofactor-dependent protein refolding(GO:0051085)	cytoplasm(GO:0005737);cytosol(GO:0005829);ribosome(GO:0005840)	Regulation of HSF1-mediated heat shock response;Cellular responses to stimuli;Cellular responses to stress;Cellular response to heat stress					Mus musculus
MOUSE|MGI=MGI=106341|UniProtKB=Q9DB20	Q9DB20	ATP synthase subunit O, mitochondrial;Atp5po;PTN000226838;orthologs	ATP SYNTHASE SUBUNIT O, MITOCHONDRIAL (PTHR11910:SF1)	proton-transporting ATP synthase activity, rotational mechanism(GO:0046933)	proton motive force-driven ATP synthesis(GO:0015986)	proton-transporting ATP synthase complex(GO:0045259);intracellular anatomical structure(GO:0005622)	ATP synthase(PC00002)		ATP hydrolysis activity(GO:0016887);protein-containing complex binding(GO:0044877);proton-transporting ATP synthase activity, rotational mechanism(GO:0046933);estradiol binding(GO:1903924)	ATP biosynthetic process(GO:0006754);monoatomic ion transport(GO:0006811);proton motive force-driven ATP synthesis(GO:0015986);proton motive force-driven mitochondrial ATP synthesis(GO:0042776);proton transmembrane transport(GO:1902600)	mitochondrial proton-transporting ATP synthase, stator stalk(GO:0000274);mitochondrial proton-transporting ATP synthase complex, coupling factor F(o)(GO:0000276);mitochondrion(GO:0005739);mitochondrial inner membrane(GO:0005743);mitochondrial proton-transporting ATP synthase complex(GO:0005753);plasma membrane(GO:0005886);cell surface(GO:0009986);membrane(GO:0016020);myelin sheath(GO:0043209);pro…	Mitochondrial biogenesis;Respiratory electron transport, ATP synthesis by chemiosmotic coupling, and heat production by uncoupling proteins.;Formation of ATP by chemiosmotic coupling;The citric acid (TCA) cycle and respiratory electron transport;Metabolism;Cristae formation;Organelle biogenesis and maintenance					Mus musculus
MOUSE|MGI=MGI=1342248|UniProtKB=O70579	O70579	Peroxisomal membrane protein PMP34;Slc25a17;PTN000639844;orthologs	PEROXISOMAL MEMBRANE PROTEIN PMP34 (PTHR45939:SF5)	organic cation transmembrane transporter activity(GO:0015101);organic anion transmembrane transporter activity(GO:0008514);carbohydrate derivative transmembrane transporter activity(GO:1901505);purine nucleotide transmembrane transporter activity(GO:0015216);salt transmembrane transporter activity(GO:1901702)	transport(GO:0006810)	membrane(GO:0016020)			ATP transmembrane transporter activity(GO:0005347);ADP transmembrane transporter activity(GO:0015217);coenzyme A transmembrane transporter activity(GO:0015228);FAD transmembrane transporter activity(GO:0015230);antiporter activity(GO:0015297);FMN transmembrane transporter activity(GO:0044610);protein-folding chaperone binding(GO:0051087);NAD transmembrane transporter activity(GO:0051724);AMP tran…	fatty acid beta-oxidation(GO:0006635);transport(GO:0006810);ATP transport(GO:0015867);fatty acid transport(GO:0015908);transmembrane transport(GO:0055085)	cytoplasm(GO:0005737);mitochondrion(GO:0005739);peroxisome(GO:0005777);peroxisomal membrane(GO:0005778);membrane(GO:0016020)	Protein localization;Alpha-oxidation of phytanate;Peroxisomal lipid metabolism;Fatty acid metabolism;Metabolism of lipids;Class I peroxisomal membrane protein import;Metabolism					Mus musculus
MOUSE|MGI=MGI=2675859|UniProtKB=Q65Z40	Q65Z40	Wings apart-like protein homolog;Wapl;PTN000499042;orthologs	WINGS APART-LIKE PROTEIN HOMOLOG (PTHR22100:SF13)		regulation of chromosome organization(GO:0033044);regulation of protein localization(GO:0032880);regulation of cell cycle process(GO:0010564)				ATP-dependent protein-DNA unloader activity(GO:0140083)	mitotic sister chromatid segregation(GO:0000070);cell cycle(GO:0007049);negative regulation of DNA replication(GO:0008156);negative regulation of chromatin binding(GO:0035562);negative regulation of sister chromatid cohesion(GO:0045875);cell division(GO:0051301);protein localization to chromatin(GO:0071168)	chromatin(GO:0000785);nucleus(GO:0005634);nucleoplasm(GO:0005654);chromosome(GO:0005694);cytoplasm(GO:0005737);cytosol(GO:0005829);intracellular membrane-bounded organelle(GO:0043231);intercellular bridge(GO:0045171);mitotic spindle(GO:0072686)	Cell Cycle, Mitotic;Mitotic Metaphase and Anaphase;Separation of Sister Chromatids;M Phase;S Phase;Mitotic Telophase/Cytokinesis;Mitotic Anaphase;Cell Cycle;Mitotic Prometaphase;Establishment of Sister Chromatid Cohesion;Resolution of Sister Chromatid Cohesion;Cohesin Loading onto Chromatin					Mus musculus
MOUSE|MGI=MGI=1920583|UniProtKB=Q3V132	Q3V132	ADP_ATP translocase 4;Slc25a31;PTN000640111;orthologs	ADP_ATP TRANSLOCASE 4 (PTHR45635:SF40)				transfer/carrier protein(PC00219)		ATP:ADP antiporter activity(GO:0005471);antiporter activity(GO:0015297)	male meiosis I(GO:0007141);spermatogenesis(GO:0007283);cell differentiation(GO:0030154);regulation of mitochondrial membrane permeability(GO:0046902);transmembrane transport(GO:0055085);mitochondrial ADP transmembrane transport(GO:0140021);negative regulation of mitochondrial outer membrane permeabilization involved in apoptotic signaling pathway(GO:1901029);mitochondrial ATP transmembrane transp…	mitochondrion(GO:0005739);mitochondrial inner membrane(GO:0005743);mitochondrial permeability transition pore complex(GO:0005757);plasma membrane(GO:0005886);cilium(GO:0005929);membrane(GO:0016020);motile cilium(GO:0031514);cell projection(GO:0042995)						Mus musculus
MOUSE|MGI=MGI=1353495|UniProtKB=P48962	P48962	ADP_ATP translocase 1;Slc25a4;PTN000640068;orthologs	ADP_ATP TRANSLOCASE 1 (PTHR45635:SF32)		regulation of transport(GO:0051049);mitochondrial transport(GO:0006839);negative regulation of organelle organization(GO:0010639);regulation of mitochondrion organization(GO:0010821);negative regulation of apoptotic signaling pathway(GO:2001234);regulation of membrane permeability(GO:0090559);mitochondrial membrane organization(GO:0007006)		transfer/carrier protein(PC00219)		ATP:ADP antiporter activity(GO:0005471);protein binding(GO:0005515);proton transmembrane transporter activity(GO:0015078);antiporter activity(GO:0015297);oxidative phosphorylation uncoupler activity(GO:0017077);enzyme binding(GO:0019899)	apoptotic mitochondrial changes(GO:0008637);negative regulation of cardiac muscle cell apoptotic process(GO:0010667);ADP transport(GO:0015866);regulation of mitochondrial membrane permeability(GO:0046902);transmembrane transport(GO:0055085);negative regulation of necroptotic process(GO:0060546);positive regulation of cell growth involved in cardiac muscle cell development(GO:0061051);mitochondria…	mitochondrion(GO:0005739);mitochondrial outer membrane(GO:0005741);mitochondrial inner membrane(GO:0005743);mitochondrial permeability transition pore complex(GO:0005757);membrane(GO:0016020);myelin sheath(GO:0043209);membrane raft(GO:0045121)	Transport of small molecules;Transport of nucleosides and free purine and pyrimidine bases across the plasma membrane;SLC-mediated transmembrane transport;Transport of vitamins, nucleosides, and related molecules					Mus musculus
MOUSE|MGI=MGI=1931882|UniProtKB=Q9QYJ0	Q9QYJ0	DnaJ homolog subfamily A member 2;Dnaja2;PTN000636513;orthologs	DNAJ HOMOLOG SUBFAMILY A MEMBER 2 (PTHR43888:SF31)	protein-folding chaperone binding(GO:0051087)	protein folding(GO:0006457)	cytosol(GO:0005829)	chaperone(PC00072)		ATPase activator activity(GO:0001671);ATP binding(GO:0005524);Hsp70 protein binding(GO:0030544);heat shock protein binding(GO:0031072);metal ion binding(GO:0046872);unfolded protein binding(GO:0051082);protein-folding chaperone binding(GO:0051087)	protein folding(GO:0006457);response to heat(GO:0009408);protein refolding(GO:0042026)	cytoplasm(GO:0005737);cytosol(GO:0005829);membrane(GO:0016020)	Cellular responses to stimuli;Cellular responses to stress;HSP90 chaperone cycle for steroid hormone receptors (SHR) in the presence of ligand					Mus musculus
MOUSE|MGI=MGI=1344381|UniProtKB=O54946	O54946	DnaJ homolog subfamily B member 6;Dnajb6;PTN000636729;orthologs	DNAJ HOMOLOG SUBFAMILY B MEMBER 6 (PTHR43948:SF6)	protein-folding chaperone binding(GO:0051087);unfolded protein binding(GO:0051082)	chaperone-mediated protein folding(GO:0061077)	nucleus(GO:0005634);cytoplasm(GO:0005737)	chaperone(PC00072)		ATPase activator activity(GO:0001671);DNA binding(GO:0003677);protein binding(GO:0005515);Hsp70 protein binding(GO:0030544);heat shock protein binding(GO:0031072);identical protein binding(GO:0042802);protein folding chaperone(GO:0044183);unfolded protein binding(GO:0051082);protein-folding chaperone binding(GO:0051087)	protein folding(GO:0006457);actin cytoskeleton organization(GO:0030036);extracellular matrix organization(GO:0030198);regulation of protein localization(GO:0032880);protein localization to nucleus(GO:0034504);negative regulation of cysteine-type endopeptidase activity involved in apoptotic process(GO:0043154);intermediate filament organization(GO:0045109);negative regulation of DNA-templated tran…	nucleus(GO:0005634);nucleoplasm(GO:0005654);cytoplasm(GO:0005737);cytosol(GO:0005829);Z disc(GO:0030018);perinuclear region of cytoplasm(GO:0048471)	Regulation of HSF1-mediated heat shock response;Cellular responses to stimuli;Cellular responses to stress;Cellular response to heat stress					Mus musculus
MOUSE|MGI=MGI=1919522|UniProtKB=Q91ZF0	Q91ZF0	DnaJ homolog subfamily C member 24;Dnajc24;PTN002454367;orthologs	DNAJ HOMOLOG SUBFAMILY C MEMBER 24 (PTHR45255:SF1)	ferrous iron binding(GO:0008198);ATPase activator activity(GO:0001671)	positive regulation of molecular function(GO:0044093)		chaperone(PC00072)		ATPase activator activity(GO:0001671);ferrous iron binding(GO:0008198);zinc ion binding(GO:0008270);metal ion binding(GO:0046872)	positive regulation of ATP-dependent activity(GO:0032781)	cytoplasm(GO:0005737);cytoskeleton(GO:0005856)	Synthesis of diphthamide-EEF2;Gamma carboxylation, hypusine formation and arylsulfatase activation;Post-translational protein modification;Metabolism of proteins					Mus musculus
MOUSE|MGI=MGI=2141135|UniProtKB=Q8K3A0	Q8K3A0	Iron-sulfur cluster co-chaperone protein HscB;Hscb;PTN000361303;orthologs	IRON-SULFUR CLUSTER CO-CHAPERONE PROTEIN HSCB (PTHR14021:SF15)				chaperone(PC00072)		ATPase activator activity(GO:0001671);identical protein binding(GO:0042802);metal ion binding(GO:0046872);protein-folding chaperone binding(GO:0051087)	iron-sulfur cluster assembly(GO:0016226);[2Fe-2S] cluster assembly(GO:0044571);protein complex oligomerization(GO:0051259);primitive hemopoiesis(GO:0060215);primitive erythrocyte differentiation(GO:0060319)	nucleoplasm(GO:0005654);cytoplasm(GO:0005737);mitochondrion(GO:0005739);cytosol(GO:0005829)	Protein localization;Mitochondrial iron-sulfur cluster biogenesis;Mitochondrial protein import;Metabolism					Mus musculus
MOUSE|MGI=MGI=107788|UniProtKB=P97370	P97370	Sodium_potassium-transporting ATPase subunit beta-3;Atp1b3;PTN000162726;orthologs	SODIUM_POTASSIUM-TRANSPORTING ATPASE SUBUNIT BETA-3 (PTHR11523:SF47)	ATPase activator activity(GO:0001671)	potassium ion import across plasma membrane(GO:1990573);inorganic ion homeostasis(GO:0098771);sodium ion transmembrane transport(GO:0035725);export from cell(GO:0140352);intracellular monoatomic cation homeostasis(GO:0030003)	plasma membrane protein complex(GO:0098797);transmembrane transporter complex(GO:1902495)	primary active transporter(PC00068)		ATPase activator activity(GO:0001671);P-type sodium:potassium-exchanging transporter activity(GO:0005391);protein binding(GO:0005515);protein-macromolecule adaptor activity(GO:0030674);ATPase binding(GO:0051117)	monoatomic ion transport(GO:0006811);potassium ion transport(GO:0006813);sodium ion transport(GO:0006814);intracellular sodium ion homeostasis(GO:0006883);metal ion transport(GO:0030001);intracellular potassium ion homeostasis(GO:0030007);positive regulation of ATP-dependent activity(GO:0032781);sodium ion transmembrane transport(GO:0035725);sodium ion export across plasma membrane(GO:0036376);pr…	cytoplasm(GO:0005737);plasma membrane(GO:0005886);sodium:potassium-exchanging ATPase complex(GO:0005890);caveola(GO:0005901);membrane(GO:0016020);basolateral plasma membrane(GO:0016323);apical plasma membrane(GO:0016324);sperm flagellum(GO:0036126)	Muscle contraction;Transport of small molecules;Ion channel transport;Ion transport by P-type ATPases;Cardiac conduction;Ion homeostasis					Mus musculus
MOUSE|MGI=MGI=1913398|UniProtKB=Q78YY6	Q78YY6	DnaJ homolog subfamily C member 15;Dnajc15;PTN000298660;orthologs	DNAJ HOMOLOG SUBFAMILY C MEMBER 15 (PTHR12763:SF7)	ATPase activator activity(GO:0001671)	protein import into mitochondrial matrix(GO:0030150)	TIM23 mitochondrial import inner membrane translocase complex(GO:0005744);mitochondrial matrix(GO:0005759)			ATPase activator activity(GO:0001671);protein binding(GO:0005515)	mitochondrial electron transport, NADH to ubiquinone(GO:0006120);cellular response to starvation(GO:0009267);protein transport(GO:0015031);regulation of lipid metabolic process(GO:0019216);protein import into mitochondrial matrix(GO:0030150);negative regulation of protein-containing complex assembly(GO:0031333);protein-containing complex assembly(GO:0065003);negative regulation of mitochondrial e…	PAM complex, Tim23 associated import motor(GO:0001405);mitochondrion(GO:0005739);mitochondrial inner membrane(GO:0005743);membrane(GO:0016020)						Mus musculus
MOUSE|MGI=MGI=3582695|UniProtKB=Q8BYU6	Q8BYU6	Torsin-1A-interacting protein 2;Tor1aip2;PTN001281153;orthologs	TORSIN-1A-INTERACTING PROTEIN 2 (PTHR18843:SF2)		membrane organization(GO:0061024)	membrane(GO:0016020)			ATPase activator activity(GO:0001671);protein binding(GO:0005515);ATPase binding(GO:0051117)	endoplasmic reticulum organization(GO:0007029);positive regulation of ATP-dependent activity(GO:0032781);membrane organization(GO:0061024);protein localization to nuclear envelope(GO:0090435)	nucleus(GO:0005634);endoplasmic reticulum(GO:0005783);membrane(GO:0016020)						Mus musculus
MOUSE|MGI=MGI=3582693|UniProtKB=Q921T2	Q921T2	Torsin-1A-interacting protein 1;Tor1aip1;PTN000782339;orthologs	TORSIN-1A-INTERACTING PROTEIN 1 (PTHR18843:SF6)		membrane organization(GO:0061024)	membrane(GO:0016020)			ATPase activator activity(GO:0001671);protein binding(GO:0005515);lamin binding(GO:0005521);cytoskeletal protein binding(GO:0008092);ATPase binding(GO:0051117)	positive regulation of ATP-dependent activity(GO:0032781);nuclear membrane organization(GO:0071763);protein localization to nuclear envelope(GO:0090435)	nucleus(GO:0005634);nuclear envelope(GO:0005635);membrane(GO:0016020);nuclear membrane(GO:0031965)	RHO GTPase cycle;RHOD GTPase cycle;Signaling by Rho GTPases, Miro GTPases and RHOBTB3;Signal Transduction;Signaling by Rho GTPases;RHOF GTPase cycle					Mus musculus
MOUSE|MGI=MGI=1914111|UniProtKB=Q9DC23	Q9DC23	DnaJ homolog subfamily C member 10;Dnajc10;PTN000637140;orthologs	DNAJ HOMOLOG SUBFAMILY C MEMBER 10 (PTHR44340:SF1)	protein binding(GO:0005515);protein-disulfide reductase activity(GO:0015035)	endoplasmic reticulum unfolded protein response(GO:0030968)	endoplasmic reticulum lumen(GO:0005788)	chaperone(PC00072)		ATPase activator activity(GO:0001671);protein binding(GO:0005515);protein-disulfide reductase activity(GO:0015035);disulfide oxidoreductase activity(GO:0015036);oxidoreductase activity(GO:0016491);oxidoreductase activity, acting on a sulfur group of donors, disulfide as acceptor(GO:0016671);Hsp70 protein binding(GO:0030544);protein-folding chaperone binding(GO:0051087);ATPase binding(GO:0051117);…	negative regulation of protein phosphorylation(GO:0001933);positive regulation of ATP-dependent activity(GO:0032781);protein folding in endoplasmic reticulum(GO:0034975);response to endoplasmic reticulum stress(GO:0034976);IRE1-mediated unfolded protein response(GO:0036498);intrinsic apoptotic signaling pathway in response to endoplasmic reticulum stress(GO:0070059)	endoplasmic reticulum(GO:0005783);endoplasmic reticulum lumen(GO:0005788);endoplasmic reticulum chaperone complex(GO:0034663)						Mus musculus
MOUSE|MGI=MGI=2387603|UniProtKB=Q8BK64	Q8BK64	Activator of 90 kDa heat shock protein ATPase homolog 1;Ahsa1;PTN000313858;orthologs	ACTIVATOR OF 90 KDA HEAT SHOCK PROTEIN ATPASE HOMOLOG 1 (PTHR13009:SF7)	ATPase activator activity(GO:0001671)	positive regulation of molecular function(GO:0044093);protein folding(GO:0006457)	cytosol(GO:0005829)	chaperone(PC00072)		ATPase activator activity(GO:0001671);protein binding(GO:0005515);protein-folding chaperone binding(GO:0051087);Hsp90 protein binding(GO:0051879)	protein folding(GO:0006457);positive regulation of ATP-dependent activity(GO:0032781)	cytoplasm(GO:0005737);endoplasmic reticulum(GO:0005783);cytosol(GO:0005829)						Mus musculus
MOUSE|MGI=MGI=109629|UniProtKB=Q9R1Q9	Q9R1Q9	V-type proton ATPase subunit S1;Atp6ap1;PTN000279825;orthologs	V-TYPE PROTON ATPASE SUBUNIT S1 (PTHR12471:SF2)				ATP synthase(PC00002)		ATPase activator activity(GO:0001671);small GTPase binding(GO:0031267);transporter activator activity(GO:0141109)	monoatomic ion transport(GO:0006811);intracellular iron ion homeostasis(GO:0006879);regulation of cellular pH(GO:0030641);osteoclast development(GO:0036035);cellular response to increased oxygen levels(GO:0036295);synaptic vesicle lumen acidification(GO:0097401);endosome to plasma membrane protein transport(GO:0099638);proton transmembrane transport(GO:1902600)	endoplasmic reticulum(GO:0005783);endosome membrane(GO:0010008);membrane(GO:0016020);synaptic vesicle membrane(GO:0030672);cytoplasmic vesicle(GO:0031410);proton-transporting V-type ATPase complex(GO:0033176);synapse(GO:0045202)	Signaling by Rho GTPases;Signaling by Receptor Tyrosine Kinases;Signaling by Insulin receptor;RHOA GTPase cycle;Insulin receptor recycling;Transport of small molecules;Transferrin endocytosis and recycling;RHO GTPase cycle;Ion channel transport;Iron uptake and transport;Signal Transduction;Signaling by Rho GTPases, Miro GTPases and RHOBTB3					Mus musculus
MOUSE|MGI=MGI=1931874|UniProtKB=Q9QYJ3	Q9QYJ3	DnaJ homolog subfamily B member 1;Dnajb1;PTN000636936;orthologs	DNAJ HOMOLOG SUBFAMILY B MEMBER 1 (PTHR24078:SF568)	transcription corepressor activity(GO:0003714);unfolded protein binding(GO:0051082);Hsp70 protein binding(GO:0030544)	negative regulation of transcription by RNA polymerase II(GO:0000122);chaperone cofactor-dependent protein refolding(GO:0051085)	cytosol(GO:0005829)	chaperone(PC00072)		ATPase activator activity(GO:0001671);transcription corepressor activity(GO:0003714);Hsp70 protein binding(GO:0030544);protein folding chaperone(GO:0044183);unfolded protein binding(GO:0051082);protein-folding chaperone binding(GO:0051087);ATPase binding(GO:0051117);transcription regulator inhibitor activity(GO:0140416)	negative regulation of transcription by RNA polymerase II(GO:0000122);protein folding(GO:0006457);positive regulation of ATP-dependent activity(GO:0032781);cellular response to heat(GO:0034605);chaperone cofactor-dependent protein refolding(GO:0051085);negative regulation of inclusion body assembly(GO:0090084)	nucleus(GO:0005634);nucleoplasm(GO:0005654);cytoplasm(GO:0005737);cytosol(GO:0005829);postsynaptic density(GO:0014069);neuronal cell body(GO:0043025);dendritic spine(GO:0043197);sperm head(GO:0061827);postsynapse(GO:0098794);glutamatergic synapse(GO:0098978)	Cellular responses to stimuli;MAPK6/MAPK4 signaling;HSF1-dependent transactivation;Attenuation phase;Cellular responses to stress;Regulation of HSF1-mediated heat shock response;Cellular response to heat stress;MAPK family signaling cascades;Signal Transduction;HSP90 chaperone cycle for steroid hormone receptors (SHR) in the presence of ligand					Mus musculus
MOUSE|MGI=MGI=1914285|UniProtKB=Q9D832	Q9D832	DnaJ homolog subfamily B member 4;Dnajb4;PTN000636965;orthologs	DNAJ HOMOLOG SUBFAMILY B MEMBER 4 (PTHR24078:SF288)	protein-folding chaperone binding(GO:0051087);unfolded protein binding(GO:0051082)	negative regulation of transcription by RNA polymerase II(GO:0000122);chaperone cofactor-dependent protein refolding(GO:0051085)	cytosol(GO:0005829)	chaperone(PC00072)		ATPase activator activity(GO:0001671);unfolded protein binding(GO:0051082);protein-folding chaperone binding(GO:0051087)	negative regulation of transcription by RNA polymerase II(GO:0000122);protein folding(GO:0006457);chaperone cofactor-dependent protein refolding(GO:0051085)	nucleoplasm(GO:0005654);cytoplasm(GO:0005737);cytosol(GO:0005829);plasma membrane(GO:0005886);membrane(GO:0016020);Z disc(GO:0030018)						Mus musculus
MOUSE|MGI=MGI=1919150|UniProtKB=Q80X71	Q80X71	Transmembrane protein 106B;Tmem106b;PTN002004586;orthologs	TRANSMEMBRANE PROTEIN 106B (PTHR28556:SF1)						ATPase binding(GO:0051117)	lysosome organization(GO:0007040);lysosomal transport(GO:0007041);lysosomal lumen acidification(GO:0007042);lysosome localization(GO:0032418);dendrite morphogenesis(GO:0048813);positive regulation of hydrolase activity(GO:0051345);neuron cellular homeostasis(GO:0070050);positive regulation of dendrite development(GO:1900006);lysosomal protein catabolic process(GO:1905146);regulation of lysosome o…	lysosome(GO:0005764);lysosomal membrane(GO:0005765);endosome(GO:0005768);plasma membrane(GO:0005886);membrane(GO:0016020)						Mus musculus
MOUSE|MGI=MGI=1913475|UniProtKB=Q9D945	Q9D945	Protein LLP homolog;Llph;PTN002151962;orthologs	PROTEIN LLP HOMOLOG (PTHR34253:SF1)	basal RNA polymerase II transcription machinery binding(GO:0001099);RNA binding(GO:0003723)	neuron projection extension(GO:1990138)	nucleolus(GO:0005730)			basal RNA polymerase II transcription machinery binding(GO:0001099);protein binding(GO:0005515)	positive regulation of dendritic spine development(GO:0060999);dendrite extension(GO:0097484)	nucleus(GO:0005634);chromosome(GO:0005694);nucleolus(GO:0005730)						Mus musculus
MOUSE|MGI=MGI=95705|UniProtKB=P15535	P15535	Beta-1,4-galactosyltransferase 1;B4galt1;PTN000446941;orthologs	BETA-1,4-GALACTOSYLTRANSFERASE 1 (PTHR19300:SF5)	UDP-galactosyltransferase activity(GO:0035250);cytoskeletal protein binding(GO:0008092)	protein N-linked glycosylation(GO:0006487)	Golgi apparatus(GO:0005794)	glycosyltransferase(PC00111)		beta-N-acetylglucosaminylglycopeptide beta-1,4-galactosyltransferase activity(GO:0003831);N-acetyllactosamine synthase activity(GO:0003945);lactose synthase activity(GO:0004461);protein binding(GO:0005515);cytoskeletal protein binding(GO:0008092);galactosyltransferase activity(GO:0008378);transferase activity(GO:0016740);glycosyltransferase activity(GO:0016757);manganese ion binding(GO:0030145);U…	epithelial cell development(GO:0002064);acute inflammatory response(GO:0002526);carbohydrate metabolic process(GO:0005975);lactose biosynthetic process(GO:0005989);galactose metabolic process(GO:0006012);protein glycosylation(GO:0006486);protein N-linked glycosylation(GO:0006487);lipid metabolic process(GO:0006629);cell adhesion(GO:0007155);binding of sperm to zona pellucida(GO:0007339);penetrati…	Golgi trans cisterna(GO:0000138);extracellular region(GO:0005576);Golgi apparatus(GO:0005794);plasma membrane(GO:0005886);external side of plasma membrane(GO:0009897);cell surface(GO:0009986);membrane(GO:0016020);basolateral plasma membrane(GO:0016323);desmosome(GO:0030057);brush border membrane(GO:0031526);protein-containing complex(GO:0032991);cell projection(GO:0042995)	Innate Immune System;Interaction With Cumulus Cells And The Zona Pellucida;Metabolism of proteins;Glycosaminoglycan metabolism;Lactose synthesis;Transport to the Golgi and subsequent modification;Metabolism;Immune System;Metabolism of carbohydrates;Reproduction;Keratan sulfate biosynthesis;Neutrophil degranulation;Asparagine N-linked glycosylation;Keratan sulfate/keratin metabolism;Fertilization;…					Mus musculus
MOUSE|MGI=MGI=95762|UniProtKB=Q60648	Q60648	Ganglioside GM2 activator;Gm2a;PTN000790940;orthologs	GANGLIOSIDE GM2 ACTIVATOR (PTHR17357:SF0)	lipid transporter activity(GO:0005319)	lipid transport(GO:0006869);carbohydrate derivative catabolic process(GO:1901136);ceramide metabolic process(GO:0006672);glycolipid metabolic process(GO:0006664);sphingolipid catabolic process(GO:0030149)	cytoplasmic side of plasma membrane(GO:0009898)	transfer/carrier protein(PC00219)		beta-N-acetylhexosaminidase activity(GO:0004563);lipid transporter activity(GO:0005319);enzyme activator activity(GO:0008047);hydrolase activity(GO:0016787)	lipid metabolic process(GO:0006629);sphingolipid metabolic process(GO:0006665);ganglioside catabolic process(GO:0006689);lipid transport(GO:0006869);learning or memory(GO:0007611);oligosaccharide catabolic process(GO:0009313);lipid storage(GO:0019915);nervous system process(GO:0050877);neuromuscular process controlling balance(GO:0050885);maintenance of location in cell(GO:0051651)	mitochondrion(GO:0005739);lysosome(GO:0005764);cytoplasmic side of plasma membrane(GO:0009898)	Immune System;Metabolism of lipids;Innate Immune System;Metabolism;Glycosphingolipid metabolism;Neutrophil degranulation;Sphingolipid metabolism					Mus musculus
MOUSE|MGI=MGI=2385271|UniProtKB=Q923D2	Q923D2	Flavin reductase (NADPH);Blvrb;PTN000385422;orthologs	FLAVIN REDUCTASE (NADPH) (PTHR43355:SF10)	oxidoreductase activity, acting on the CH-CH group of donors, NAD or NADP as acceptor(GO:0016628)			reductase(PC00198)		biliverdin reductase (NAD(P)+) activity(GO:0004074);oxidoreductase activity(GO:0016491);riboflavin reductase (NADPH) activity(GO:0042602);biliberdin reductase NAD+ activity(GO:0106276);biliverdin reductase (NADP+) activity(GO:0106277)	heme catabolic process(GO:0042167)	nucleoplasm(GO:0005654);cytoplasm(GO:0005737);cytosol(GO:0005829);plasma membrane(GO:0005886);terminal bouton(GO:0043195);intracellular membrane-bounded organelle(GO:0043231)	Heme degradation;Metabolism of porphyrins;Cellular responses to stimuli;Cellular responses to stress;Metabolism;Cytoprotection by HMOX1;Cellular response to chemical stress					Mus musculus
MOUSE|MGI=MGI=106381|UniProtKB=Q9CX66	Q9CX66	NOP protein chaperone 1;Nopchap1;PTN002010511;orthologs	NOP PROTEIN CHAPERONE 1 (PTHR28674:SF1)	ribonucleoprotein complex binding(GO:0043021)	protein-RNA complex assembly(GO:0022618)				box C/D snoRNP complex binding(GO:0062064)	box C/D snoRNP assembly(GO:0000492)	cellular_component(GO:0005575);nucleus(GO:0005634)						Mus musculus
MOUSE|MGI=MGI=1099438|UniProtKB=Q9R1J0	Q9R1J0	Sterol-4-alpha-carboxylate 3-dehydrogenase, decarboxylating;Nsdhl;PTN000041317;orthologs	STEROL-4-ALPHA-CARBOXYLATE 3-DEHYDROGENASE, DECARBOXYLATING (PTHR10366:SF242)	oxidoreductase activity, acting on the CH-OH group of donors, NAD or NADP as acceptor(GO:0016616)			dehydratase(PC00091)		C-3 sterol dehydrogenase (C-4 sterol decarboxylase) activity(GO:0000252);3-beta-hydroxy-delta5-steroid dehydrogenase activity(GO:0003854);oxidoreductase activity(GO:0016491);oxidoreductase activity, acting on the CH-OH group of donors, NAD or NADP as acceptor(GO:0016616);sterol-4-alpha-carboxylate 3-dehydrogenase (decarboxylating) activity(GO:0047012);4alpha-carboxy-4beta-methyl-5alpha-cholesta-8…	hair follicle development(GO:0001942);lipid metabolic process(GO:0006629);steroid biosynthetic process(GO:0006694);cholesterol biosynthetic process(GO:0006695);smoothened signaling pathway(GO:0007224);steroid metabolic process(GO:0008202);cholesterol metabolic process(GO:0008203);sterol biosynthetic process(GO:0016126);labyrinthine layer blood vessel development(GO:0060716)	endoplasmic reticulum(GO:0005783);lipid droplet(GO:0005811);membrane(GO:0016020)	Metabolism of steroids;Cholesterol biosynthesis;Metabolism of lipids;Metabolism					Mus musculus
MOUSE|MGI=MGI=1913484|UniProtKB=Q9CRA4	Q9CRA4	Methylsterol monooxygenase 1;Msmo1;PTN000221365;orthologs	LATHOSTEROL OXIDASE-RELATED (PTHR11863:SF226)				oxidase(PC00175)		C-4 methylsterol oxidase activity(GO:0000254);iron ion binding(GO:0005506);oxidoreductase activity(GO:0016491)	lipid metabolic process(GO:0006629);steroid biosynthetic process(GO:0006694);cholesterol biosynthetic process(GO:0006695);steroid metabolic process(GO:0008202);cholesterol metabolic process(GO:0008203);lipid biosynthetic process(GO:0008610);sterol biosynthetic process(GO:0016126)	endoplasmic reticulum(GO:0005783);endoplasmic reticulum membrane(GO:0005789);membrane(GO:0016020)	Metabolism of steroids;Cholesterol biosynthesis;Metabolism of lipids;Metabolism					Mus musculus
MOUSE|MGI=MGI=107822|UniProtKB=P70245	P70245	3-beta-hydroxysteroid-Delta(8),Delta(7)-isomerase;Ebp;PTN000368044;orthologs	3-BETA-HYDROXYSTEROID-DELTA(8),DELTA(7)-ISOMERASE (PTHR14207:SF0)	isomerase activity(GO:0016853)	sterol biosynthetic process(GO:0016126)	endoplasmic reticulum(GO:0005783)	isomerase(PC00135)		C-8 sterol isomerase activity(GO:0000247);steroid delta-isomerase activity(GO:0004769);isomerase activity(GO:0016853);identical protein binding(GO:0042802);cholestenol delta-isomerase activity(GO:0047750)	lipid metabolic process(GO:0006629);steroid biosynthetic process(GO:0006694);cholesterol biosynthetic process(GO:0006695);steroid metabolic process(GO:0008202);cholesterol metabolic process(GO:0008203);sterol metabolic process(GO:0016125);sterol biosynthetic process(GO:0016126);hemopoiesis(GO:0030097);ossification involved in bone maturation(GO:0043931)	nucleus(GO:0005634);nuclear envelope(GO:0005635);endoplasmic reticulum(GO:0005783);endoplasmic reticulum membrane(GO:0005789);membrane(GO:0016020);cytoplasmic vesicle(GO:0031410);nuclear membrane(GO:0031965)	Cholesterol biosynthesis via lathosterol;Cholesterol biosynthesis via desmosterol;Metabolism of steroids;Cholesterol biosynthesis;Metabolism of lipids;Metabolism					Mus musculus
MOUSE|MGI=MGI=3026965|UniProtKB=Q3UMR5	Q3UMR5	Calcium uniporter protein, mitochondrial;Mcu;PTN000336034;orthologs	CALCIUM UNIPORTER PROTEIN, MITOCHONDRIAL (PTHR13462:SF16)	calcium channel activity(GO:0005262);secondary active transmembrane transporter activity(GO:0015291)	mitochondrial transmembrane transport(GO:1990542);mitochondrial calcium ion homeostasis(GO:0051560);calcium ion transmembrane transport(GO:0070588)	calcium channel complex(GO:0034704);inner mitochondrial membrane protein complex(GO:0098800)			calcium channel activity(GO:0005262);protein binding(GO:0005515);uniporter activity(GO:0015292);identical protein binding(GO:0042802)	monoatomic ion transport(GO:0006811);calcium ion transport(GO:0006816);mitochondrial calcium ion transmembrane transport(GO:0006851);calcium-mediated signaling(GO:0019722);positive regulation of insulin secretion(GO:0032024);monoatomic ion transmembrane transport(GO:0034220);calcium import into the mitochondrion(GO:0036444);glucose homeostasis(GO:0042593);protein complex oligomerization(GO:005125…	mitochondrion(GO:0005739);mitochondrial inner membrane(GO:0005743);membrane(GO:0016020);calcium channel complex(GO:0034704);uniplex complex(GO:1990246)	Mitochondrial calcium ion transport;Transport of small molecules;Processing of SMDT1					Mus musculus
MOUSE|MGI=MGI=1921173|UniProtKB=Q921L3	Q921L3	Calcium load-activated calcium channel;Tmco1;PTN000467714;orthologs	CALCIUM LOAD-ACTIVATED CALCIUM CHANNEL (PTHR20917:SF0)	calcium channel activity(GO:0005262)	intracellular calcium ion homeostasis(GO:0006874)	cytoplasm(GO:0005737)			calcium channel activity(GO:0005262);ribosome binding(GO:0043022)	monoatomic ion transport(GO:0006811);calcium ion transport(GO:0006816);ER overload response(GO:0006983);endoplasmic reticulum calcium ion homeostasis(GO:0032469);monoatomic ion transmembrane transport(GO:0034220);calcium ion transmembrane transport(GO:0070588);multi-pass transmembrane protein insertion into ER membrane(GO:0160063)	cytoplasm(GO:0005737);endoplasmic reticulum(GO:0005783);endoplasmic reticulum membrane(GO:0005789);Golgi apparatus(GO:0005794);membrane(GO:0016020);multi-pass translocon complex(GO:0160064)						Mus musculus
MOUSE|MGI=MGI=2151156|UniProtKB=P83093	P83093	Stromal interaction molecule 2;Stim2;PTN000388475;orthologs	STROMAL INTERACTION MOLECULE 2 (PTHR15136:SF2)	calcium ion binding(GO:0005509);channel regulator activity(GO:0016247)	calcium ion transport(GO:0006816);positive regulation of cation channel activity(GO:2001259);regulation of calcium ion transport(GO:0051924);intracellular calcium ion homeostasis(GO:0006874)	endoplasmic reticulum(GO:0005783);plasma membrane(GO:0005886)			calcium channel regulator activity(GO:0005246);calcium ion binding(GO:0005509);protein binding(GO:0005515);store-operated calcium channel activity(GO:0015279);metal ion binding(GO:0046872)	store-operated calcium entry(GO:0002115);monoatomic ion transport(GO:0006811);calcium ion transport(GO:0006816);intracellular calcium ion homeostasis(GO:0006874);activation of store-operated calcium channel activity(GO:0032237);positive regulation of calcium ion transport(GO:0051928)	endoplasmic reticulum(GO:0005783);plasma membrane(GO:0005886);membrane(GO:0016020)						Mus musculus
[truncated: 4,800 more rows]

## Sheet: S5_SampleList
filename	concentration	normalization
[truncated: 9 more rows]

## Sheet: S6_PRMTargets
Target Accessions		Optional Proteins	Inclusion List/Manually Vetted Peptides
[truncated: 1,621 more rows]
