# Supplementary material for: Rapid assay development for low input targeted proteomics using a versatile linear ion trap
Source: Research Square preprint supplement (doi:10.21203/rs.3.rs-4702746/v1), 2024-07-19
Supplement: Supplementary file 1 [file bc80023f442e5b490bde7630.pdf]

## Reporting Summary

Nature Portfolio wishes to improve the reproducibility of the work that we publish. This form provides structure for consistency and transparency in reporting. For further information on Nature Portfolio policies, see our [Editorial Policies](#) and the [Editorial Policy Checklist](#).

### Statistics

For all statistical analyses, confirm that the following items are present in the figure legend, table legend, main text, or Methods section.

n/a Confirmed

- |                                     |                                     |                                                                                                                                                                                                                                                            |
|-------------------------------------|-------------------------------------|------------------------------------------------------------------------------------------------------------------------------------------------------------------------------------------------------------------------------------------------------------|
| <input type="checkbox"/>            | <input checked="" type="checkbox"/> | The exact sample size ( $n$ ) for each experimental group/condition, given as a discrete number and unit of measurement                                                                                                                                    |
| <input type="checkbox"/>            | <input checked="" type="checkbox"/> | A statement on whether measurements were taken from distinct samples or whether the same sample was measured repeatedly                                                                                                                                    |
| <input checked="" type="checkbox"/> | <input type="checkbox"/>            | The statistical test(s) used AND whether they are one- or two-sided<br><i>Only common tests should be described solely by name; describe more complex techniques in the Methods section.</i>                                                               |
| <input checked="" type="checkbox"/> | <input type="checkbox"/>            | A description of all covariates tested                                                                                                                                                                                                                     |
| <input type="checkbox"/>            | <input checked="" type="checkbox"/> | A description of any assumptions or corrections, such as tests of normality and adjustment for multiple comparisons                                                                                                                                        |
| <input type="checkbox"/>            | <input checked="" type="checkbox"/> | A full description of the statistical parameters including central tendency (e.g. means) or other basic estimates (e.g. regression coefficient) AND variation (e.g. standard deviation) or associated estimates of uncertainty (e.g. confidence intervals) |
| <input checked="" type="checkbox"/> | <input type="checkbox"/>            | For null hypothesis testing, the test statistic (e.g. $F$ , $t$ , $r$ ) with confidence intervals, effect sizes, degrees of freedom and $P$ value noted<br><i>Give <math>P</math> values as exact values whenever suitable.</i>                            |
| <input checked="" type="checkbox"/> | <input type="checkbox"/>            | For Bayesian analysis, information on the choice of priors and Markov chain Monte Carlo settings                                                                                                                                                           |
| <input checked="" type="checkbox"/> | <input type="checkbox"/>            | For hierarchical and complex designs, identification of the appropriate level for tests and full reporting of outcomes                                                                                                                                     |
| <input checked="" type="checkbox"/> | <input type="checkbox"/>            | Estimates of effect sizes (e.g. Cohen's $d$ , Pearson's $r$ ), indicating how they were calculated                                                                                                                                                         |

Our web collection on [statistics for biologists](#) contains articles on many of the points above.

### Software and code

Policy information about [availability of computer code](#)

Data collection XCalibur v1.0.4283, SpectraFlo v3

Data analysis EncyclopeDIA v.3.0.0-SNAPSHOT, Proteome Discoverer 3.1 (CHIMERYS node), Prosit v2019, Skyline 23.1.0.455, FlowJo v10, Proteowizard 3.0.23146

For manuscripts utilizing custom algorithms or software that are central to the research but not yet described in published literature, software must be made available to editors and reviewers. We strongly encourage code deposition in a community repository (e.g. GitHub). See the Nature Portfolio [guidelines for submitting code & software](#) for further information.

### Data

Policy information about [availability of data](#)

All manuscripts must include a [data availability statement](#). This statement should provide the following information, where applicable:

- Accession codes, unique identifiers, or web links for publicly available datasets
- A description of any restrictions on data availability
- For clinical datasets or third party data, please ensure that the statement adheres to our [policy](#)

Proteomics data and Skyline documents are available on Panorama at <https://panoramaweb.org/StellarIonTrapForLowInput.url>. All proteomics raw data is also publicly available on the MASSIVE repository under the accession number MSV000094904 (<ftp://massive.ucsd.edu/v08/MSV000094904/>). Open-source software developed for this project is publicly available as part of the EncyclopeDIA project at <https://bitbucket.org/searleb/encyclopedia>.

## Research involving human participants, their data, or biological material

Policy information about studies with [human participants or human data](#). See also policy information about [sex, gender \(identity/presentation\), and sexual orientation](#) and [race, ethnicity and racism](#).

|                                                                    |                                                                                                              |
|--------------------------------------------------------------------|--------------------------------------------------------------------------------------------------------------|
| Reporting on sex and gender                                        | N/a                                                                                                          |
| Reporting on race, ethnicity, or other socially relevant groupings | N/a                                                                                                          |
| Population characteristics                                         | N/a                                                                                                          |
| Recruitment                                                        | N/a                                                                                                          |
| Ethics oversight                                                   | The institutional review board at the Ohio State University approved the use of animal models in this study. |

Note that full information on the approval of the study protocol must also be provided in the manuscript.

## Field-specific reporting

Please select the one below that is the best fit for your research. If you are not sure, read the appropriate sections before making your selection.

☒ Life sciences ☐ Behavioural & social sciences ☐ Ecological, evolutionary & environmental sciences

For a reference copy of the document with all sections, see [nature.com/documents/nr-reporting-summary-flat.pdf](https://nature.com/documents/nr-reporting-summary-flat.pdf)

## Life sciences study design

All studies must disclose on these points even when the disclosure is negative.

|                 |                                                                                                                                                                                                                                                                                                                                                                                                                                                                                                                                                                 |
|-----------------|-----------------------------------------------------------------------------------------------------------------------------------------------------------------------------------------------------------------------------------------------------------------------------------------------------------------------------------------------------------------------------------------------------------------------------------------------------------------------------------------------------------------------------------------------------------------|
| Sample size     | A sample size of 2 mice were used for the purpose of this study. One biological replicate was used to generate the IL-2 stimulated T cell samples, while the other spleen was used to generate the IL-15 stimulated T cell samples. No stimulated controls were taken from each spleen. For IL-2 and IL-15 stimulated T cells, a total of 90 wells were combined from cell culture into a single replicate for cells stimulated until Day 6, and 46 were pooled for cells stimulated until day 10. 24-well plates were used for cell culture.                   |
| Data exclusions | Technical replicates of the PRM data was excluded at the 1 ng level in IL-15 harvested at Day 6 data as a result of an instrument error which caused no sample to be injected. The samples which were blank were excluded from this study.                                                                                                                                                                                                                                                                                                                      |
| Replication     | Two spleens were used to isolate immune cells for culture. Cells were expanded into 90 wells for an earlier time point, and 46 wells for a later time point, then combined for mass spectrometry. 1 representative well from each condition was used for flow cytometry on days 5, 6 and 10. PRM assays at the 1 ng level on IL-15 and IL-2 stimulated T cell proteomes, harvested at Days 6 and 10, were collected in triplicate. The analogous 10 ng and 100 ng assays were collected in duplicate. All libraries and calibration curves were not replicated. |
| Randomization   | For PRM technical replicates, the IL-2 and IL-15 stimulated T cell proteomes harvested at Days 6 and 10 were randomized in their injection order. One technical replicate of each condition was blocked together and acquired prior to acquiring second and third technical replicates.                                                                                                                                                                                                                                                                         |
| Blinding        | Not applicable.                                                                                                                                                                                                                                                                                                                                                                                                                                                                                                                                                 |

## Reporting for specific materials, systems and methods

We require information from authors about some types of materials, experimental systems and methods used in many studies. Here, indicate whether each material, system or method listed is relevant to your study. If you are not sure if a list item applies to your research, read the appropriate section before selecting a response.

### Materials & experimental systems

|                                     |                                                                 |
|-------------------------------------|-----------------------------------------------------------------|
| n/a                                 | Involved in the study                                           |
| <input type="checkbox"/>            | <input checked="" type="checkbox"/> Antibodies                  |
| <input checked="" type="checkbox"/> | <input type="checkbox"/> Eukaryotic cell lines                  |
| <input checked="" type="checkbox"/> | <input type="checkbox"/> Palaeontology and archaeology          |
| <input type="checkbox"/>            | <input checked="" type="checkbox"/> Animals and other organisms |
| <input checked="" type="checkbox"/> | <input type="checkbox"/> Clinical data                          |
| <input checked="" type="checkbox"/> | <input type="checkbox"/> Dual use research of concern           |
| <input checked="" type="checkbox"/> | <input type="checkbox"/> Plants                                 |

### Methods

|                                     |                                                    |
|-------------------------------------|----------------------------------------------------|
| n/a                                 | Involved in the study                              |
| <input checked="" type="checkbox"/> | <input type="checkbox"/> ChIP-seq                  |
| <input type="checkbox"/>            | <input checked="" type="checkbox"/> Flow cytometry |
| <input checked="" type="checkbox"/> | <input type="checkbox"/> MRI-based neuroimaging    |

## Antibodies

|                 |                                                                                                                                                                                                                         |
|-----------------|-------------------------------------------------------------------------------------------------------------------------------------------------------------------------------------------------------------------------|
| Antibodies used | Antibody information is listed in supplemental data Table S1 in the supplemental PDF.                                                                                                                                   |
| Validation      | The antibodies for B220 and CD25 from ThermoFisher Scientific underwent advanced verification, according to the manufacturer's website. All other antibodies were verified using isotype controls by the manufacturers. |

## Animals and other research organisms

Policy information about [studies involving animals](#); [ARRIVE guidelines](#) recommended for reporting animal research, and [Sex and Gender in Research](#)

|                         |                                                                                                                                                                                     |
|-------------------------|-------------------------------------------------------------------------------------------------------------------------------------------------------------------------------------|
| Laboratory animals      | Female mice from the C57BL/6J strain were sacrificed for this work at the age of 4 months and 11 days.                                                                              |
| Wild animals            | N/a                                                                                                                                                                                 |
| Reporting on sex        | Sex was not considered in regards to this study. All biology that is discussed is reported in prior literature, therefore we do not consider that sex is a covariate in this study. |
| Field-collected samples | N/a                                                                                                                                                                                 |
| Ethics oversight        | The use of an animal murine model was approved by the Institutional Review Board at the Ohio State University.                                                                      |

Note that full information on the approval of the study protocol must also be provided in the manuscript.

## Plants

|                       |     |
|-----------------------|-----|
| Seed stocks           | N/a |
| Novel plant genotypes | N/a |
| Authentication        | N/a |

## Flow Cytometry

### Plots

Confirm that:

- ☒ The axis labels state the marker and fluorochrome used (e.g. CD4-FITC).
- ☒ The axis scales are clearly visible. Include numbers along axes only for bottom left plot of group (a 'group' is an analysis of identical markers).
- ☒ All plots are contour plots with outliers or pseudocolor plots.
- ☒ A numerical value for number of cells or percentage (with statistics) is provided.

### Methodology

|                    |                                                                                                                                                                                                                                                                                                                                                                                                                                                                                                                                                                                                                                                                                                                                                                                                                                                                                                                                |
|--------------------|--------------------------------------------------------------------------------------------------------------------------------------------------------------------------------------------------------------------------------------------------------------------------------------------------------------------------------------------------------------------------------------------------------------------------------------------------------------------------------------------------------------------------------------------------------------------------------------------------------------------------------------------------------------------------------------------------------------------------------------------------------------------------------------------------------------------------------------------------------------------------------------------------------------------------------|
| Sample preparation | On days 5, 6, and 10, flow cytometry was performed with the following procedure: cultures pooled together, washed three times with PBS, and counted on a hemocytometer. Cells were then stained in the dark for 30 minutes at 4°C with the viability dye (Live/Dead Fixable Blue Dead Cell Stain kit, for UV excitation from Thermo Fisher Scientific) at a ratio of 1:1000. Extracellular markers, anti-CD4, anti-CD45R, anti-CD8, and anti-TCR-β at a concentration of 1 to 400 antibody to cell solution. Additionally, anti-CD69, anti-CD62L, and anti-CD25 were added at a 1 to 200 ratio. Anti-CD44 was applied at a ratio of 1 to 600, and the cell solution was 20 minutes at 4°C. More details on the antibody panel are available in Supplemental Table 1. Stained cells were analyzed with a Cytex Biosciences Aurora 5-laser flow cytometer. Data was processed and visualized in BD Biosciences FlowJo™ software. |
| Instrument         | Cytex Biosciences Aurora System                                                                                                                                                                                                                                                                                                                                                                                                                                                                                                                                                                                                                                                                                                                                                                                                                                                                                                |
| Software           | BD Biosciences FlowJo Software was used for analysis. The SpectraFlo software from Cytex Biosciences was used to acquire data on the flow cytometer.                                                                                                                                                                                                                                                                                                                                                                                                                                                                                                                                                                                                                                                                                                                                                                           |

## Cell population abundance

On day 6, there were 92.5 million IL-15 stimulated T cells and 119.5 million T cells for the IL-2 condition. On day 10, there were 153 million IL-15 cells stimulated T cells, and 90.5 million IL-2 stimulated T cells. Cells were counted using a hemocytometer, and purity was determined using flow cytometry. On day 6, 39.2% of the IL-15 culture were lymphocytes, while 48% of the culture were lymphocytes in the IL-2 stimulated condition. On day 10 68.5% of the IL-15 culture were lymphocytes, while 54.1% of the culture were lymphocytes. Flow cytometry without cell sorting was performed, therefore the purity of each population was not checked.

## Gating strategy

In each culture and time point, lymphocytes were gated on FSC-A (forward scattering area) and SSC-A (side-scattering area), then single cells were selected using FSC-W and FSC-A, then by SSC-W (side-scattering width) and FSC-A. Viability was determined using a Live/Dead Blue A Viability stain against FSC-A. T cells were gated using TCR-Beta and B220.

☒ Tick this box to confirm that a figure exemplifying the gating strategy is provided in the Supplementary Information.
